# Supplementary material for: Modeling molecular development of breast cancer in canine mammary tumors
Source: HighWire-hosted journal article supplement (doi:10.1101/gr.256388.119), 2020-12-23
Supplement: Supplemental_Table_S1.xlsx [file Supplemental_Table_S1.xlsx]

## Sheet: Supplemental Table S1
Supplemental Table S1: Clinical information describing each sample used in analysis.
Sample	LibPrep	SeqRun	RIN	PatientNumber	Diameter	Location	Tumor Grade	Goldschmidt	Human Counterpart	Hist	PAM50	Surgery Date	Status	Status Date	Breed	ER Expression	PR Expression	HER2 Expression	Cluster
1A	LB1	SB5	9.5	1	7	R2		severe duct ectasia/cyst formation	duct ectasia	N	LumA	2009-07-09		2009-07-16	mixed_breed	High	High	Medium
1C	LB1	SB5	9.2	1	2	R4	1	carcinoma arising in benign mixed tumor	carcinoma arising in a pleomorphic adenoma	M	Her2	2009-07-09		2009-07-16	mixed_breed	Medium	Medium	Medium	1
1E	LB1	SB5	9.2	1	2.5	L4		mammary adenoma	tubular adenoma	B	LumA	2009-07-09		2009-07-16	mixed_breed	High	High	Medium	2
1F	LB1	SB6	9.6	1	2.6	L5	1	carcinoma arising in benign mixed tumor	carcinoma arising in a pleomorphic adenoma	M	Basal	2009-07-09		2009-07-16	mixed_breed	Medium	Medium	High	1
2A	LB9	SB18	9.2	13	0.2	L3a		complex adenoma	adenomyoepithelioma	B	LumB	2009-12-22	alive	2013-08-02	Standard_Poodle	High	High	High	1
2B	LB9	SB17	9.1	13	0.5	L3c		adenoma	tubular adenoma	B	LumA	2009-12-22	alive	2013-08-02	Standard_Poodle	Medium	Medium	Medium	2
2C	LB9	SB17	NA	13	N	NL5		lobular hyperplasia	adenosis	N	LumA	2009-12-22	alive	2013-08-02	Standard_Poodle	Medium	High	High
2D	LB9	SB18	9.5	13	0.2	L5		complex adenoma	adenomyoepithelioma	B	LumB	2009-12-22	alive	2013-08-02	Standard_Poodle	High	High	Medium	1
2E	LB9	SB17	6.4	13	N	NR1		normal mammary tissue	normal	N	LumA	2009-12-22	alive	2013-08-02	Standard_Poodle	Medium	High	Medium
2F	LB9	SB17	9.7	13	0.5	R4b		carcinoma in-situ	intraductal carcinoma-in-situ	M	Basal	2009-12-22	alive	2013-08-02	Standard_Poodle	Low	Low	Medium	3
3A	LB7	SB13	8.1	17	0.6	L1a		lobular hypoplasia, adenoma, mastitis	tubular adenoma	B	LumB	necropsy	dead	2010-02-08	English_Setter	Medium	Medium	Medium	4
3B	LB7	SB13	8.6	17	1.7	L4a	1	low grade, focal carcinoma arising in a complex adenoma	carcinoma arising in an adenomyoepithelioma	M	LumB	necropsy	dead	2010-02-08	English_Setter	Medium	Medium	Medium	3
3C	LB7	SB13	6.9	17	N	NR1		mild lobular hyperplasia	adenosis	N	LumA	necropsy	dead	2010-02-08	English_Setter	Medium	Medium	High
3D	LB7	SB13	9.8	17	1.8	R4a		adenoma (large duct type) and epitheliosis	tubular adenoma and epitheliosis	B	LumA	necropsy	dead	2010-02-08	English_Setter	High	High	High	1
4A	LB10	SB19	NA	18	1.5	R2	1	carcinoma arising in mixed mammary tumor	carcinoma arising in a pleomorphic adenoma	M	LumA	2010-02-24	alive	2013-02-19	English_Setter	Medium	Low	Medium	2
4B	LB10	SB19	9.3	18	0.3	R3		adenoma	tubular adenoma	B	LumA	2010-02-24	alive	2013-02-19	English_Setter	High	High	High	1
4C	LB10	SB19	6.5	18	N	NR3		duct ectasia	duct ectasia	N	Basal	2010-02-24	alive	2013-02-19	English_Setter	Low	Low	Medium
4D	LB10	SB19	8.1	18	N	NL3		lobular hyperplasia, duct ectasia with atypia	adenosis and duct ectasia with atypia	N	LumA	2010-02-24	alive	2013-02-19	English_Setter	High	High	High
4E	LB10	SB19	8.9	18	0.4	L4		complex adenoma	adenomyoepithelioma	B	LumA	2010-02-24	alive	2013-02-19	English_Setter	Medium	High	High	1
4F	LB10	SB19	NA	18	0.5	MG3		lobular hyperplasia	adenosis	N	LumA	2010-02-24	alive	2013-02-19	English_Setter	Medium	High	Medium
6A	LB1	SB1	8.1	29	N	NR2		normal ductal tissue	normal	N	LumA	2010-10-19	dead	2012-12-04	German_Shepherd	High	Medium	Medium
6B	LB1	SB1	10	29	0.4	L3		complex adenoma	adenomyoepithelioma	B	Her2	2010-10-19	dead	2012-12-04	German_Shepherd	High	High	High	1
6C	LB2	SB1	6.9	29	2.7	R2	2	carcinoma with multifocal necrosis	tubular carcinoma	M	Basal	2010-10-19	dead	2012-12-04	German_Shepherd	Low	Low	Low	3
6D	LB2	SB1	7.4	29	0.2	R3		complex adenoma	adenomyoepithelioma	B	LumA	2010-10-19	dead	2012-12-04	German_Shepherd	High	High	High	3
6E	LB2	SB1	7.6	29	0.5	R5		lobular hyperplasia with atypia	adenosis	N	LumB	2010-10-19	dead	2012-12-04	German_Shepherd	High	Medium	High
8A	LB2	SB2	9.9	34	1.9	L1		complex adenoma	adenomyoepithelioma	B	LumA	2011-02-01	alive	2013-09-06	Chihuahua	Medium	Medium	Medium	3
8B	LB2	SB2	9.7	34	7.6	L2b	1	carcinoma (low grade based on discussion w/Dr. G)	tubular carcinoma	M	Normal	2011-02-01	alive	2013-09-06	Chihuahua	Medium	Medium	Medium	3
8C	LB2	SB2	10	34	0.4	L3		complex adenoma	adenomyoepithelioma	B	LumA	2011-02-01	alive	2013-09-06	Chihuahua	High	High	Medium	1
8D	LB2	SB2	9.7	34	N	NL4		duct ectasia	duct ectasia	N	LumA	2011-02-01	alive	2013-09-06	Chihuahua	High	High	High
8E	LB2	SB2	9.8	34	1.8	R3	1	tubular carcinoma (low grade based on discussion w/Dr. G)	tubular carcinoma	M	LumB	2011-02-01	alive	2013-09-06	Chihuahua	Medium	Medium	Medium	3
9A	LB3	SB3	9.1	36	0.6	L2		adenoma	tubular adenoma	B	LumA	2011-01-21	alive	2013-08-08	mixed_breed	High	High	High	2
9B	LB3	SB4	9.4	36	0.5	L3b		complex adenoma	adenomyoepithelioma	B	LumB	2011-01-21	alive	2013-08-08	mixed_breed	High	High	High	2
9C	LB3	SB4	9.3	36	0.9	L3c		complex adenoma	adenomyoepithelioma	B	LumA	2011-01-21	alive	2013-08-08	mixed_breed	High	High	High	1
9D	LB3	SB3	9.2	36	0.4	R1b		duct ectasia	duct ectasia	N	Basal	2011-01-21	alive	2013-08-08	mixed_breed	Medium	Medium	Medium
9E	LB3	SB4	9.6	36	0.8	R2		adenoma	tubular adenoma	B	Basal	2011-01-21	alive	2013-08-08	mixed_breed	Medium	Medium	Medium	1
9F	LB3	SB3	9.8	36	3.6	R4		low grade tubular carcinoma with necrosis	tubular carcinoma	M	LumB	2011-01-21	alive	2013-08-08	mixed_breed	Medium	Medium	Medium	3
9G	LB3	SB4	8.6	36	N	NR5		duct ectasia and lobular hyperplasia	duct ectasia and adenosis	N	LumA	2011-01-21	alive	2013-08-08	mixed_breed	High	High	High
10A	LB5	SB9	9.5	47	N	NL3		adenoma and lobular hyperplasia	tubular adenoma	B	LumA	2011-10-28	dead	2012-08-06	German_Shepherd	High	Medium	Medium	4
10B	LB5	SB9	9.5	47	3.6	L3	2	carcinoma	tubular carcinoma	M	Basal	2011-10-28	dead	2012-08-06	German_Shepherd	Low	Low	Medium	3
10C	LB5	SB9	9.6	47	0.9	L4b		lobular hyperplasia	adenosis	N	LumA	2011-10-28	dead	2012-08-06	German_Shepherd	High	High	High
10D	LB5	SB10	10	47	0.3	R3		adenoma with focal mineralization	tubular adenoma	B	LumA	2011-10-28	dead	2012-08-06	German_Shepherd	High	Medium	High	2
10F	LB5	SB10	9.4	47	1	R5		lobular hyperplasia	adenosis	N	LumB	2011-10-28	dead	2012-08-06	German_Shepherd	High	High	Low
11A	LB8	SB15	8.5	54	N	N		duct ectasia, lobular hyperplasia, duct papillomatosis with atypia	duct ectasia, adenosis, micropapillary intraductal hyperplasia	N	LumA	2012-01-13	alive	2013-07-26	Husky	Medium	High	High
11B	LB8	SB15	9.7	54	0.7	L3b	2	epitheliosis, carcinoma-in-situ, carcinoma	epitheliosis, ca-in-situ, tubular carcinoma	M	Basal	2012-01-13	alive	2013-07-26	Husky	Low	Low	Medium	1
11C	LB8	SB15	8.8	54	1	L4		intraductal papillary adenoma	papillary ductal adenoma	B	LumA	2012-01-13	alive	2013-07-26	Husky	High	High	Medium	2
11E	LB9	SB18	9.7	54	1	L5b		intraductal papillary adenoma	papillary ductal adenoma	B	LumA	2012-01-13	alive	2013-07-26	Husky	High	High	Medium	1
11F	LB8	SB16	7.9	54	0.5	R4		duct ectasia, lobular hyperplasia, duct papillomatosis with atypia and adenoma	duct ectasia, adenosis, ductal papillomatosis w atypia, tubular adenoma	N	LumA	2012-01-13	alive	2013-07-26	Husky	High	Medium	High
11G	LB8	SB16	9.2	54	2.5	R5a		complex adenoma	adenomyoepithelioma	B	LumA	2012-01-13	alive	2013-07-26	Husky	High	High	High	2
11H	LB8	SB16	6.9	54	0.5	R5b		duct ectasia, lobular hyperplasia, duct papillomatosis with atypia, carcinoma-in-situ	duct ectasia, adenosis, ductal papillomatosis w atypia, ca-in-situ	M	Normal	2012-01-13	alive	2013-07-26	Husky	Medium	High	High	3
11I	LB8	SB15	10	54	7	R4		adenocarcinoma, lobular hyperplasia, papillary adenoma	ductal carcinoma, adenosis, papillary adenoma	M	Basal	2012-06-06	alive	2013-07-26	Husky	Medium	Medium	Medium	1
11J	LB8	SB16	9.9	54	1	L3		adenocarcinoma with focal lymphatic invasion	tubular carcinoma w focal lymphatic invasion	M	Basal	2012-06-06	alive	2013-07-26	Husky	Medium	Low	Medium	1
12A	LB6	SB11	NA	59	N	N		severe duct ectasia and lobular hyperplasia	severe duct ectasia and adenosis	N	LumA	2012-05-01	alive	2013-07-25	mixed_breed	Medium	Medium	Medium
12B	LB6	SB11	NA	59	8	R3	2	severe duct ectasia with papillomatosis, lobular hyperplasia and multifocal periductal carcinoma with sclerosis	severe duct ectasia with papillomatosis, adenosis and multifocal periductal carcinoma and sclerosis	M	LumB	2012-05-01	alive	2013-07-25	mixed_breed	Medium	Medium	High	2
12C	LB6	SB11	NA	59	7.7	R5		severe duct ectasia and lobular hyperplasia	severe duct ectasia and adenosis	N	LumA	2012-05-01	alive	2013-07-25	mixed_breed	High	High	High
12D	LB6	SB11	8.9	59	5.6	L4		adenomas	tubular adenomas	B	LumB	2012-05-01	alive	2013-07-25	mixed_breed	Medium	Medium	Medium	2
13A	LB4	SB7	8.8	66	N	N		duct ectasia, lactation	duct ectasia and lactation	N	LumA	2012-04-25	alive	2013-06-10	Pitbull	Medium	Medium	High
13B	LB4	SB8	9.5	66	0.7	R3		adenoma with sclerosis	tubular adenoma with sclerosis	B	LumA	2012-04-25	alive	2013-06-10	Pitbull	High	Medium	Medium	4
13C	LB4	SB7	8.7	66	0.6	R5a	1	tubular carcinoma	tubular carcinoma	M	LumA	2012-04-25	alive	2013-06-10	Pitbull	High	Medium	Medium	4
13D	LB4	SB7	9.7	66	0.6	R5b		ductal adenoma	ductal adenoma	B	Basal	2012-04-25	alive	2013-06-10	Pitbull	Medium	Medium	Medium	3
13E	LB4	SB8	9.2	66	1.1	L3		complex adenoma	adenomyoepithelioma	B	LumA	2012-04-25	alive	2013-06-10	Pitbull	High	High	Medium	4
13F	LB4	SB8	9.3	66	0.9	L4a		adenoma with sclerosis	tubular adenoma with sclerosis	B	LumA	2012-04-25	alive	2013-06-10	Pitbull	High	High	High	2
13G	LB4	SB8	8.9	66	0.7	L4b		complex adenoma	adenomyoepithelioma	B	LumB	2012-04-25	alive	2013-06-10	Pitbull	Medium	Medium	Medium	3
14A	LB13	SB24	9.8	69	N	N		mild lobular hyperplasia and duct ectasia	mild adenosis and duct ectasia	N	LumB	2012-04-11	alive	2013-05-06	Yorkshire_Terrier	High	High	Medium
14B	LB13	SB24	10	69	0.5	R1	1	carcinoma	tubular carcinoma	M	LumA	2012-04-11	alive	2013-05-06	Yorkshire_Terrier	Medium	High	Medium	3
14C	LB13	SB25	9.9	69	3.2	R3		complex adenoma	adenomyoepithelioma	B	LumA	2012-04-11	alive	2013-05-06	Yorkshire_Terrier	Medium	Medium	Medium	4
14D	LB13	SB24	10	69	0.7	R4a		adenoma	tubular adenoma	B	LumA	2012-04-11	alive	2013-05-06	Yorkshire_Terrier	Medium	High	High	3
14E	LB13	SB25	8.3	69	0.8	L2		adenoma	tubular adenoma	B	LumA	2012-05-09	alive	2013-05-06	Yorkshire_Terrier	Medium	Medium	High	4
14F	LB13	SB25	9.3	69	1	L3		complex adenoma	adenomyoepithelioma	B	LumA	2012-05-09	alive	2013-05-06	Yorkshire_Terrier	High	Medium	Medium	1
14G	LB13	SB25	5.5	69	N	N		lobular hyperplasia and duct ectasia	adenosis and duct ectasia	N	LumA	2012-05-09	alive	2013-05-06	Yorkshire_Terrier	High	High	High
15A	LB7	SB14	7.1	70	N	N		mild duct ectasia and lobular hyperplasia	duct ectasia and adenosis	N	LumA	2012-04-06	alive	2013-07-16	Papillon	Medium	Medium	High
15B	LB7	SB14	7.9	70	3.2	L3	1	tubular carcinoma, low grade with desmoplasia	tubular carcinoma	M	LumA	2012-04-06	alive	2013-07-16	Papillon	High	High	High	2
15C	LB7	SB14	10	70	1.25	R1		ductal adenoma	ductal adenoma	B	Basal	2012-04-06	alive	2013-07-16	Papillon	Low	Low	Medium	2
16A	LB11	SB21	9.2	82	0.5	R3a		intraductal papillary adenoma	papillary ductal adenoma	B	LumB	2012-10-04	alive	2013-06-28	Akita	High	High	High	4
16B	LB11	SB21	9.4	82	5.9	R5a		complex adenoma	adenomyoepithelioma	B	LumA	2012-10-04	alive	2013-06-28	Akita	High	High	High	1
16C	LB11	SB20	9.2	82	-	L3		simple adenoma	tubular adenoma	B	LumA	2012-10-04	alive	2013-06-28	Akita	High	High	High	2
16D	LB11	SB21	NA	82	-	L4a		complex adenoma	adenomyoepithelioma	B	LumA	2012-10-04	alive	2013-06-28	Akita	High	Medium	Medium	2
16E	LB11	SB20	9.3	82	-	L4b		lobular hyperplasia	adenosis	N	LumA	2012-10-04	alive	2013-06-28	Akita	Low	Medium	Medium
16F	LB11	SB20	9.1	82	-	L5b	1	intraductal carcinoma	papillary carcinoma	M	Basal	2012-10-04	alive	2013-06-28	Akita	Medium	Medium	Medium	1
17A	LB6	SB12	4.4	83	N	N		lobular hyperplasia	adenosis	N	LumA	2012-10-02	dead	2013-03-01	Shih_Tzu	Medium	Medium	High
17B	LB6	SB12	NA	83	0.5	L5	1	duct papillomatosis, epitheliosis and carcinoma-in-situ	carcinoma in-situ	M	LumA	2012-10-02	dead	2013-03-01	Shih_Tzu	High	Medium	Medium	1
17C	LB6	SB12	6.2	83	0.3	R3		lobular hyperplasia	adenosis	N	LumA	2012-10-02	dead	2013-03-01	Shih_Tzu	Medium	Medium	High
17D	LB6	SB12	8.8	83	0.5	R5		benign adenoma with lobular hyperplasia	adenoma	B	LumB	2012-10-02	dead	2013-03-01	Shih_Tzu	Medium	High	High	1
18A	LB12	SB22	7.5	89	N	N		duct ectasia with periductal inflammation	duct ectasia	N	LumA	2012-12-19	alive	2013-02-21	Italian_Greyhound	Medium	Medium	Medium
18B	LB12	SB23	8.6	89	3.3	R2a		adenoma with sclerosis, duct ectasia with papillomatosis	tubular adenoma with sclerosis, duct ectasia	B	LumA	2012-12-19	alive	2013-02-21	Italian_Greyhound	Medium	Medium	Medium	4
18C	LB12	SB23	8.6	89	0.3	R2c		complex adenoma	adenomyoepithelioma	B	LumA	2012-12-19	alive	2013-02-21	Italian_Greyhound	Medium	High	High	2
18D	LB12	SB22	9.3	89	0.5	R3a	1	tubular carcinoma, low grade	tubular carcinoma	M	Basal	2012-12-19	alive	2013-02-21	Italian_Greyhound	Medium	Medium	Medium	3
18E	LB12	SB22	9.2	89	0.3	R3c		adenoma	tubular adenoma	B	Basal	2012-12-19	alive	2013-02-21	Italian_Greyhound	Low	Low	Medium	3
18F	LB12	SB23	7.8	89	1.8	R4		complex adenoma	adenomyoepithelioma	B	LumA	2012-12-19	alive	2013-02-21	Italian_Greyhound	High	High	High	1
18G	LB12	SB23	9.7	89	2	R5	1	complex adenoma and intraductal papillary carcinoma	adenomyoepithelioma and papillary carcinoma	M	LumA	2012-12-19	alive	2013-02-21	Italian_Greyhound	High	High	High	1
