# Supplementary material for: Modeling molecular development of breast cancer in canine mammary tumors
Source: HighWire-hosted journal article supplement (doi:10.1101/gr.256388.119), 2020-12-23
Supplement: Supplemental_Table_S2.xlsx [file Supplemental_Table_S2.xlsx]

## Sheet: Supplemental_Table_S2
Supplemental Table S2: Genes differentially expressed in a comparison of normal-carcinoma CMT samples at FDR < 0.05.
Gene	Fold Change
COL11A1	3.139
TMEM2	3.122
ADAMTS17	2.962
STK26	2.94
NCKAP5	2.827
FKBP10	2.79
CCDC88A	2.746
NOSTRIN	0.3577
P3H4	2.861
IGDCC4	2.784
MEX3A	2.845
WISP1	2.718
CHST11	2.743
MPP6	2.75
ASXL2	2.685
EDIL3	2.606
RYBP	2.723
WWTR1	2.72
SLC41A2	2.668
ALDH18A1	2.755
MID1	2.738
CKAP4	2.671
GPSM2	2.656
RAB21	2.671
SLC26A2	2.604
SLK	2.535
DDAH1	2.584
STXBP4	2.598
RBP7	0.3997
RLIM	2.435
ACAP2	2.439
TFRC	2.504
ANKRD44	2.59
MAGED1	2.724
DBN1	2.582
GALNT15	0.3921
CEMIP	2.663
LZTS3	2.63
FADS2	2.683
ACAT2	2.418
FNDC3B	2.513
PCYOX1	2.618
LSM12	2.587
TMED8	2.509
SPP2	0.3871
C14orf37	2.51
HMMR	2.517
COL8A1	2.463
VEPH1	2.517
KCTD12	2.351
FAM126A	2.458
C1QTNF12	0.4127
TUBB4A	2.569
RASSF6	0.4099
PDE4D	2.408
ADAMTS6	2.517
SOCS4	2.453
CD36	0.4206
PLEKHG2	2.562
ITGAV	2.474
CLEC5A	2.474
PANK3	2.457
INHBA	2.36
ITIH3	0.4293
VASH2	2.482
GNAQ	2.4
SMC2	2.431
TXNIP	0.4092
FMO3	0.4041
UGGT2	2.411
RAB6B	2.489
CDC7	2.507
KIDINS220	2.365
ZBTB33	2.398
LMAN1	2.354
SLC35F1	2.478
SLC35G1	2.322
NGEF	2.525
PLEKHA8	2.487
MUC4	0.4168
C17orf58	0.4266
DNAL1	2.308
FABP4	0.4427
GPIHBP1	0.4262
TRIM33	2.389
ENTPD7	2.337
SMO	2.549
TENM2	0.4248
SMC5	2.382
PALLD	2.479
NPY1R	0.4187
MDFIC	2.322
CCL13	2.372
KIAA0141	0.4029
TBX1	0.4234
EXO1	2.41
CD300LG	0.4212
ADAMTS4	2.347
PTPN11	2.338
FRS2	2.35
CGGBP1	2.424
SLC25A23	2.431
TTC3	2.431
SOCS5	2.308
WDR7	2.277
CDCA2	2.393
PLOD2	2.319
MAPK1	2.305
WNK3	2.329
TPPP	0.4267
DDX3X	2.333
TIGD1	2.405
PGK1	2.301
C16orf72	2.283
BTAF1	2.281
GARNL3	2.378
NAA25	2.23
AHNAK	0.4173
ETV1	2.18
SLCO2A1	2.365
CHST1	2.413
ANPEP	0.4488
MGAT5	2.363
E2F3	2.412
CLIC4	2.281
SERPINE1	2.301
BCLAF1	2.275
RIMKLA	2.347
RNASE4	0.4322
CLOCK	2.272
ADCY4	0.4381
ZNF367	2.456
SNORD12B	2.331
RBM28	2.313
PRR14L	2.398
AFAP1	2.353
PCYT1B	2.299
GPC2	2.379
ROCK2	2.281
WDR12	2.385
TBL1XR1	2.218
LYST	2.369
TRAFD1	2.387
ZNF24	2.203
GTF3C4	2.283
CYYR1	0.4509
LMBRD2	2.148
ANLN	2.285
COL12A1	2.355
UBA6	2.263
ABT1	2.411
SELENBP1	0.4374
USP37	2.273
GFPT1	2.285
PAPPA	2.321
CENPU	2.315
FNIP1	2.22
TTPAL	2.293
P4HA1	2.266
FBP1	0.4238
TET3	2.312
PDE6H	0.4361
ERCC4	2.264
SLC16A1	2.362
UHMK1	2.12
NAB1	2.318
TSC22D3	0.4245
CLCN2	2.319
ALDH1L1	0.4324
WDPCP	2.276
NDRG3	2.338
ADK	2.258
CCNE1	2.441
TMEM263	2.289
EFR3A	2.239
TMEM181	2.228
ZNF311	2.367
LIF	2.243
TAOK1	2.293
BGN	2.315
CCDC186	2.199
ANOS1	2.262
SPA17	0.4293
OSCP1	0.4243
ZBTB10	2.194
AC093155.3	2.177
AVL9	2.224
NCOA3	2.238
SHC1	2.24
ERO1B	2.241
CDKN2B	2.165
CDKN1A	2.185
USP45	2.266
NRIP2	0.4436
SYNCRIP	2.211
DENND1B	2.059
ROBO2	0.4769
MYBL2	2.242
ATF2	2.16
C5orf24	2.201
CANX	2.233
MMP17	2.298
GCGR	0.4488
OSBPL3	2.196
CLSPN	2.276
STK38L	2.16
FAR1	2.212
EPM2AIP1	2.24
THNSL1	2.139
CLEC3B	0.4611
PDIA5	0.455
PRC1	2.167
DSG3	2.227
CD2AP	2.144
ASB9	0.4408
TMEM50A	0.435
TRIP12	2.217
CENPL	2.219
ITIH5	0.4625
AZIN1	2.2
PDLIM5	2.175
CD55	0.4338
PANX1	2.184
ADGRA3	2.212
MALT1	2.183
NOLC1	2.265
AREL1	2.253
LGALS12	0.4681
KIF2A	2.185
CA9	2.194
SELENOI	2.157
UNC119	2.334
DSN1	2.263
SPECC1L	2.229
LOXL2	2.258
SLX4IP	2.174
GPX3	0.4536
SLC9A7	2.229
CCP110	2.187
HIF1A	2.252
MKI67	2.22
TMX4	2.203
CPSF2	2.134
ATG3	0.4731
MIOX	0.4505
MPZL1	2.246
RAB22A	2.275
SLC4A11	2.116
TANC2	2.171
CNDP1	0.4586
HIP1R	2.263
DAG1	2.298
CTNNB1	2.144
HOMER1	2.201
WASHC4	2.157
CEP97	2.185
C1orf115	0.4579
ITGA1	2.145
SLC35B4	2.175
FAM168A	2.181
SYT16	2.257
ATM	2.116
SEC22B	2.182
TCF12	2.161
MCM10	2.163
HLTF	2.177
ARL15	2.218
MAP4K4	2.277
TOP2A	2.217
CCSER2	2.137
DSC3	2.207
CDC45	2.127
DCBLD1	2.222
NOC4L	2.158
KIAA0895	2.178
PDE10A	2.092
RBBP8	2.228
FNBP1L	2.233
SLC26A10	0.4692
ANKIB1	2.166
HSPA4L	2.213
GJA1	2.257
ARHGEF15	0.4754
RAPGEF3	0.456
HJURP	2.219
CPD	2.114
CERS6	2.168
SHCBP1	2.169
ZC3H12C	2.074
SHMT2	2.136
NEK1	2.205
ATP11C	2.178
THUMPD1	2.162
ABL2	2.172
CDS1	2.124
DGKE	2.184
TMTC3	2.09
SH3BP1	2.213
MAN1A2	2.188
E2F1	2.169
GLS2	2.155
ZC2HC1C	0.4591
PLXDC2	2.198
ENO1	2.173
SCN4A	0.4608
MARS2	2.144
CENPH	2.219
ZKSCAN8	2.212
UBQLN1	2.217
GPR155	2.141
PDE4C	0.4823
ADCY2	0.4691
TMEM241	2.184
ZBTB41	2.092
ZNF655	2.112
GALNT5	2.153
TMEM222	0.4615
STK32B	0.4548
EEPD1	0.4678
HELB	2.1
SOX12	2.205
SLC2A13	2.069
TPX2	2.163
CREBRF	2.137
CALU	2.169
COL11A2	2.173
RALGAPB	2.117
ARL5B	2.055
GPM6B	2.206
AZI2	2.16
BTBD7	2.091
MCF2L	0.4504
SCRN3	2.133
ZNF10	2.157
TMEM245	2.033
BCL2L12	2.134
PDS5B	2.079
KIF15	2.093
PREPL	2.051
CILP2	2.158
TNIK	2.058
STRN	2.109
RPN2	2.164
ATF5	2.212
PNPLA2	0.4577
DPY19L3	2.093
ESCO2	2.162
PDK4	0.4786
LRP6	2.138
ACLY	2.172
DCK	2.137
SOX4	2.181
SLC37A1	0.4368
TNKS	2.015
KTN1	2.1
CKAP2L	2.193
CCDC170	0.4823
GLUL	0.4725
TMBIM6	0.4661
MAP3K7	2.098
RASA2	2.136
BYSL	2.076
CPQ	0.4748
ACTR2	2.071
FER	2.107
NMRAL1	2.124
FANCI	2.152
LTBP4	0.4664
FAM91A1	2.093
SHANK1	2.141
ATP2C1	2.201
NRAS	2.149
SEC23A	2.133
ITIH4	0.4962
TRIP11	2.049
SLF2	2.051
HK2	2.15
CLCN5	2.113
SECISBP2L	2.043
GNA13	2.135
FAT1	2.129
NUFIP2	2.076
KCTD3	2.158
LIMK1	2.133
PRKD3	2.12
SYNJ2	2.133
FKBP9	2.233
SSH2	2.081
WNK1	2.062
WDFY3	2.102
TANK	2.186
DSEL	2.153
RASGEF1B	0.4667
CDKN1B	0.4454
NDUFA4L2	2.114
RICTOR	2.087
PAPSS1	2.076
PWP1	2.111
DGKG	0.4805
MACF1	2.103
WWC2	2.028
PRELID3B	2.045
SGO2	2.098
DUSP10	0.4562
DLX5	2.071
CCSAP	2.158
NAALAD2	0.4734
SRSF6	2.154
CHADL	2.116
TPMT	2.159
GOPC	2.072
NCAPG2	2.052
MPHOSPH9	2.102
OSBPL10	2.093
FHL2	2.071
RIC1	2.067
2020-03-09	2.162
KIF14	2.121
LRRC8B	2.058
SUPT20H	2.137
INPP4A	2.151
NCAPG	2.112
PTBP3	2.071
RHOQ	2.071
SKA3	2.088
WDR3	2.171
PAFAH1B1	2.116
SAE1	2.177
GNG2	2.068
PLCB4	2.113
PLBD1	0.4571
KIF5B	2.043
UBR5	2.05
AACS	2.026
SLC30A9	2.08
HMCN1	0.4964
PLCE1	2.031
METTL7A	0.443
RIMBP2	0.4562
CENPE	2.125
SACS	2.017
DDX6	2.047
ABCC4	2.063
KIF11	2.118
MCC	2.117
PAWR	2.12
CIT	2.141
EMSY	2.112
CHSY1	2.125
ARMCX3	1.999
RTN1	0.4506
BIRC6	2.043
AFF4	2.024
SOGA1	2.203
VPS13B	2.033
SPAG4	2.117
ERCC6	2.08
TRIM59	2.076
HEATR5A	2.063
BMP2K	2.003
BTNL9	0.4753
ITGA6	2.149
SBNO1	2.026
KIF18B	2.157
TEAD1	2.023
CYP27C1	2.09
UHRF1BP1L	2.043
IGF2R	2.15
CCT8	2.131
HMGCS1	2.189
MIB1	2.05
TBC1D8B	2.019
RBM15	2.026
BAIAP3	0.4689
EPOR	0.4644
NF1	1.997
ELMO2	2.127
CKAP2	2.063
BRCA1	2.111
FN1	2.041
ZKSCAN1	2.055
USHBP1	0.499
PMS1	2.111
IDE	2.007
ADCY3	2.104
CEP170	2.009
TAF2	2.015
GOLM1	2.117
UBA2	2.109
PLOD1	2.041
ABRAXAS1	2.076
NUF2	2.039
CDCA7	2.064
HECA	2.076
ADRB2	0.4927
NUP155	2.037
IGFBP5	2.122
PBRM1	1.997
LIMCH1	2.046
LMO3	0.4831
HOOK1	1.979
SLC30A4	2.038
CDC14B	2.072
CDC6	2.103
CDCA5	2.013
SEC23B	2.11
YTHDF3	2.026
RBM25	2.034
GLCE	2.067
FAM160B1	2.029
TLE4	2.114
RASSF8	2.027
KLHL24	2.054
ZNF322	2.076
ENTPD4	2.013
ANKEF1	0.506
MCM4	2.075
NCOA2	1.993
TOP1	2.062
TIA1	2.076
NR2C2	2.084
TMX3	2.02
PPAT	2.046
DTL	2.077
WDR62	2.082
POLE	2.127
PDE1B	0.5004
GDF11	2.061
SMG1	1.984
IL15RA	0.4725
LRFN4	2.067
NRIP1	1.975
RAB3GAP2	1.979
HEATR5B	2.006
KIAA1549	2.038
ORC6	2.088
PBK	2.08
LRRC58	1.982
FANCM	2.071
DCAF6	0.4862
ADRA1A	0.4973
TGFBR1	2.018
PCBP4	2.095
FEM1C	1.93
ERBIN	1.992
ZZZ3	2.014
PAK1	2.13
KANK3	0.4998
TICRR	2.075
IQGAP3	2.063
FBXO5	2.041
CASC4	2.012
RRP12	2.127
PGR	0.4933
LIN54	2.077
KBTBD12	0.485
HECTD4	2.11
RND3	0.4711
ZFP30	2.047
ZSCAN16	2.078
PLA2G16	0.4995
VCL	2.127
SMAD5	1.995
BCHE	0.4935
MED1	2.024
SLC7A6	2.054
PPARGC1B	2.055
SOX17	0.5059
CTTNBP2NL	1.953
BNIP3	2.037
ZBTB16	0.4982
NAXE	2.089
MDFI	2.051
NF2	2.057
CDH2	2.061
MYBL1	2.019
LTBP2	2.051
FAM126B	2.07
DCP1A	2.02
RNF167	0.4711
PITPNC1	2.061
CCNF	2.057
UGGT1	1.872
FAM210B	1.999
CPT1A	0.4887
HSPA5	1.97
CADM4	2.144
UGT8	2.051
ZDHHC20	1.966
UBFD1	1.996
ABCB9	2
BMPR1B	1.996
ZFP2	0.4963
SMARCC1	2.066
RAB3GAP1	2.047
VPS13A	1.949
MDN1	2.085
PDZK1IP1	0.4735
TOX	1.985
MFSD4A	0.4763
CACUL1	2.078
2020-09-02	2.072
FBLIM1	2.014
CYP7B1	1.934
CCNT2	2.02
SSB	2.007
ERCC6L	2.022
COQ8A	0.501
SNX13	1.95
LRIG2	1.954
MON2	1.937
SELENOP	0.5229
KCTD9	2.009
XG	0.4944
TMEM61	0.5042
LYSMD2	0.4751
TRIM37	2.003
MPDZ	2.058
FANCD2	2.027
ANO8	2.127
CENPJ	2.015
CES1	0.4846
NCAPD3	1.923
SMOX	1.994
UBXN7	2.013
PDZD8	2.01
TMEM179B	0.4859
SPAG9	2.027
COL6A5	1.942
PNPT1	1.955
2020-09-11	2.062
PTPRZ1	2.028
NEMF	1.904
ZNF207	2.057
HSPA13	2.005
ARHGAP5	1.922
MGAT5B	1.984
HECW2	2.095
HTR7	2.071
ABCG2	0.5282
EFHD1	0.4959
FAM114A2	2.02
KIF20A	1.986
MCU	1.959
TSPAN4	0.5132
MASTL	1.963
MPPE1	0.49
FEM1B	1.881
ITCH	1.981
S100A14	0.4842
SSR1	1.986
CYP51A1	2.04
PDK1	1.979
BRWD3	1.942
OLFM2	1.98
ANKLE2	1.977
BMPR1A	1.997
ASNS	2.004
GATA3	0.4931
TTLL1	1.976
SLC35E3	2.039
TRIM7	0.4698
ZMYM3	2.067
ITPR1	2.032
AFG1L	0.4981
ZSWIM6	1.997
NCR3LG1	1.956
GINS4	2.025
TSPAN11	1.977
TRIB2	2.009
APOL5	0.5258
ARHGEF19	2.028
SOWAHC	2.04
CNOT6L	2.006
PDE5A	1.955
MGLL	0.4984
SNPH	1.998
MEF2A	1.944
ACOX2	0.5109
COL4A1	2.045
MYO19	1.98
CAT	0.4803
MUM1L1	1.934
PRKAR2A	1.991
UHRF1BP1	1.966
ZBED9	2.01
PPARG	0.4916
YEATS2	2.016
ZNF35	2.001
NOVA1	0.515
GYS1	2.049
RNF41	2.072
CASP2	2.053
REEP3	1.93
LRRC1	0.506
SEL1L	1.987
FKBP7	1.961
TBC1D4	1.966
FNDC4	1.972
RDX	1.973
DDX21	1.964
GLB1L2	0.5016
ADAM12	1.987
FAM171B	1.985
MTO1	2.029
DEPDC1B	1.968
ERMP1	1.964
ATP6V0A2	1.941
PACSIN1	1.867
BNIP2	1.926
AIG1	0.5109
MAPK6	1.95
GMNN	1.969
CXCL12	0.5231
KDELR3	2.019
ZNF12	1.944
MPP5	1.902
TRNT1	2.003
SFXN1	1.937
KNL1	1.993
KIF23	1.966
TMF1	1.923
ATP10B	1.989
FOXJ1	0.4961
TMEM97	1.956
WHAMM	0.5034
SHOC2	1.979
SPTY2D1	1.957
DHX36	1.966
RCOR2	2.009
KNTC1	1.969
MLPH	0.4961
ISLR	0.5167
DOCK5	1.939
SRSF12	1.976
PHF6	1.991
PRKAG1	0.5119
PDHA1	1.975
NEBL	1.94
ZNF516	1.959
GAS2L3	2.013
DLGAP5	1.981
COL5A2	2.019
FAM168B	2.031
VPS4B	1.959
EML4	1.963
SKIL	1.927
BPTF	1.942
GPD1	0.4948
RAB10	1.94
COL4A2	2.038
TK1	1.985
PARP8	1.912
SRSF3	1.944
CTPS1	1.956
SLC25A42	0.5202
MARCKSL1	2.033
RSC1A1	1.835
BMP4	0.51
CAND1	1.949
ANKRD13A	1.979
SLC39A14	1.993
CCDC149	0.4906
ENOPH1	1.974
DGKD	2.055
PARPBP	1.945
BCDIN3D	0.5077
NPTX1	0.5228
ZNF770	1.919
NT5C3B	2.003
REXO5	1.994
VASP	1.95
QKI	1.931
KDM3A	1.93
PIP4P1	0.5134
APPL2	0.5269
KAZALD1	1.952
IL17RD	1.982
UBE2E2	1.965
MYRF	2.077
LARP6	0.5247
PKMYT1	2.019
XPNPEP3	1.935
QDPR	0.4837
MCM2	1.997
THBS4	0.4965
CAPN5	0.5004
DZIP1	1.987
FOXA1	0.495
ATF6	2.011
NUP188	2.036
MTMR6	1.916
COG6	1.959
SIX4	1.929
WISP3	2.068
USF3	1.897
MAN2A2	1.973
SULT2B1	0.4907
YOD1	1.923
TNKS2	1.91
SRD5A1	1.937
ZNF654	1.898
MEOX2	0.4923
DNAJC18	2.002
YWHAG	1.969
ITGA2	1.909
HOXB7	0.5112
TESC	0.4929
DCTN5	1.948
SNCG	0.5059
NPR1	0.5281
ZMYND19	1.967
ZBTB38	1.932
SCOC	1.964
R3HDM1	1.943
ADNP	1.971
CPEB4	1.819
DIAPH3	1.939
KPNB1	2.03
GTSE1	1.94
RAB23	1.946
METTL24	0.5242
PSME4	1.887
SLC25A26	0.5125
HAAO	0.5045
USP31	1.974
PPP2R5E	1.861
ZNF605	1.983
TLK1	1.923
LSM10	0.5055
SULF1	1.983
CDH24	1.989
ROBO1	1.933
ROR2	0.5143
ANO1	0.4927
RBSN	2.013
ASB8	0.5065
APPL1	1.872
REST	1.853
DNMT3A	1.997
GSAP	1.921
PLAUR	1.949
MTMR12	1.941
REEP6	0.5003
SGO1	1.947
CHEK2	1.964
NOTCH2	1.943
FZD6	1.9
CDC27	1.861
PPP2R3A	1.928
CHGA	2.043
STT3B	1.896
DCBLD2	1.936
THBS1	1.902
CRELD1	1.915
BTN1A1	0.5066
ENPEP	0.5262
XPOT	1.918
RERG	0.5163
HEBP1	0.498
SQSTM1	0.513
MSLN	0.4972
AQP9	0.517
TSKS	0.5298
CDH11	1.907
SPAG5	1.915
CA4	0.5128
MGA	1.896
DEPDC1	1.973
SSBP3	0.5072
FAM214B	1.902
PLIN2	0.5233
SCARA5	0.512
CCT6A	1.921
LRCH3	1.894
NDUFAF5	1.906
PARG	1.928
DNA2	1.979
APLP1	1.993
AEN	1.904
KDM5B	1.946
UBL7	0.5051
C11orf24	1.927
NOL6	1.971
TAB2	1.916
GTF3C3	1.909
C14orf93	0.5163
GNL3	1.966
CDCA3	1.953
ALDH1L2	1.95
GRTP1	0.4862
ATRN	1.948
CD109	1.885
MFSD8	1.898
GAD1	1.993
SSFA2	1.947
ELF5	0.4952
CNOT6	1.908
TMEM120B	1.92
FCER1A	0.5201
GPRIN1	1.913
ACAA2	0.5228
WSB1	1.938
FERMT1	1.966
LHX6	0.5392
YTHDC2	1.858
RASGRF2	0.5479
TRIM27	2.057
GATA2	0.5244
MFAP3	1.889
RNFT2	1.935
RNGTT	1.896
RNF168	1.93
SULT4A1	1.994
FBXO21	1.927
DEPDC7	1.909
MYLK3	0.5104
PPRC1	1.967
AP1AR	1.957
GNG10	1.864
BACH2	1.99
RFX2	0.5093
TPR	1.861
SENP5	1.88
LTN1	1.875
SLC30A3	1.957
PAK3	1.983
SLC4A4	1.966
EPHB2	0.5223
ATAD2	1.913
SHROOM2	1.902
SKA2	1.947
SH3RF3	1.847
KMT2A	1.853
IFT46	0.5268
BTBD10	1.95
SLC5A5	0.5216
KLF12	1.939
NFYC	0.5358
ST6GAL2	1.892
PUM3	1.892
APAF1	1.898
ATG16L1	1.995
SLC25A13	1.92
ORC1	1.917
EBF3	0.5437
GRB14	1.965
POSTN	1.893
AADAT	1.849
KCNIP4	0.5342
FAM208B	1.852
DIAPH2	1.861
NAV3	1.876
HOXC4	0.5053
FADS1	1.919
CRADD	0.5422
REL	1.799
RAB5A	1.908
SMARCA1	1.868
RCOR1	1.91
KDM4C	1.883
ASF1B	1.94
OTUD1	0.5152
XK	0.5442
NOL4L	1.993
KRT18	0.4924
KLF11	0.5351
2020-09-03	1.917
ATP10D	1.935
IARS	1.933
CELSR2	1.989
C1GALT1	1.905
TNN	1.898
RCAN3	1.881
NECAB3	1.982
CDC73	1.919
FAAH	0.5251
NSD1	1.909
NECTIN3	1.871
TNXB	0.5363
TTBK2	1.91
LDLR	1.911
ARNT2	1.94
FAM222B	1.967
PSEN1	1.887
ZNF280B	1.846
ROCK1	1.837
PAICS	1.928
FBXO30	1.911
CFD	0.5515
AUTS2	1.894
CASP8AP2	1.81
ITGA10	1.919
C7orf57	0.487
SPRYD3	0.5115
GPC3	0.5256
CEP78	1.949
C20orf194	1.954
RAB36	1.881
NTMT1	1.892
CDKL5	1.95
FAM161A	1.892
MMD	1.939
TRPC6	0.5122
PRLR	0.527
NEK2	1.886
PPM1K	1.833
SLC1A7	0.5151
CPEB2	1.784
HSPA12B	0.5528
IVD	0.5193
BTBD3	1.879
ARPP19	1.854
TULP4	1.966
INTS2	1.86
CBFA2T2	2.019
TEAD2	1.93
WISP2	0.5255
CCDC18	1.912
GMDS	1.901
FKTN	1.821
CALCOCO1	0.5286
TNFSF10	0.5212
CPT1C	0.5245
CEP76	1.86
EPHX1	0.5441
MRS2	1.921
RUNX1T1	0.5436
C16orf95	0.5401
PDGFB	1.97
PDE2A	0.5282
XPA	1.826
PTGER4	0.5268
TTC39A	1.957
IRAK3	1.827
PIK3CA	1.864
C6orf203	0.559
CDK14	1.872
PALM	0.5456
AOC3	0.5401
NIN	1.834
CYP27A1	0.5384
GRAMD1B	0.5291
GOT2	1.879
SLC44A4	0.4996
ESM1	1.818
SLC3A2	0.5192
AMDHD1	0.5041
MAPK8	1.881
FAM149A	0.5435
MYSM1	1.746
RAD54L	1.87
GOLGA3	1.938
THAP5	1.864
DNAJC10	1.854
NDP	1.856
HAUS6	1.823
MMP13	1.856
HTATIP2	0.509
UBA1	1.96
MRGBP	1.888
CRK	1.893
EXOC5	1.828
ANKRD37	1.929
TMEM128	0.5141
SRPK1	1.882
MTHFD1L	1.879
ZNF248	1.862
SDAD1	1.874
GPATCH2L	1.894
FAM81A	1.874
TYSND1	1.852
SEMA4G	1.924
CHORDC1	1.832
MMS22L	1.894
SCAI	1.842
LDLRAD3	0.5222
MINDY1	0.526
GBF1	1.914
GXYLT1	1.845
SEC13	1.929
CMKLR1	1.896
PEX7	0.5249
SFRP2	1.906
ZWILCH	1.863
DAZAP2	0.5226
BAG2	1.865
BLOC1S6	1.883
ROR1	1.858
CASP10	1.834
ZNF397	1.858
ANKRD28	1.864
DPY19L1	1.841
CDK8	1.827
CNTN1	1.88
G3BP2	1.784
PLPBP	0.5195
NOP16	1.844
TM6SF1	0.5372
ARFGEF2	1.808
ELP1	1.869
CSN3	0.5243
ZMYM2	1.858
ZHX1	1.808
METTL16	1.921
AGPAT2	0.5226
GNB4	1.89
KCNQ5	1.896
GIT2	1.853
PIK3R4	1.858
TFDP2	1.925
KRT20	0.5327
RRAD	0.5326
AMPD2	1.905
AL109827.1	1.878
XPNPEP2	0.5456
DGKH	1.944
PLK4	1.853
CDK12	1.86
ITGA9	1.959
C2orf40	1.908
GLS	1.883
SLC22A3	0.5505
THRA	0.5574
INCENP	1.877
XDH	0.5288
VCPIP1	1.827
ZSWIM1	1.843
CEP68	1.948
ZNF462	1.885
RFTN2	1.873
RABIF	1.776
HAPLN1	1.835
LEMD3	1.858
RSBN1	1.804
ESPL1	1.908
CCDC142	1.884
GJC1	1.852
CREB3L2	1.819
VWC2	0.5441
GSK3B	1.829
TNRC6B	1.86
ALOX15	0.5363
GPX8	1.882
FNBP1	1.891
AKAP12	0.5328
CAB39L	0.534
DDI2	1.824
GAPVD1	1.881
PLXDC1	0.5534
MKL1	1.901
MIER3	1.828
RIPOR3	0.5272
DIP2B	1.864
TMPRSS2	0.5134
PLEKHG6	0.5145
POGLUT1	1.833
ASRGL1	1.896
TRPM4	1.875
SPON2	0.5367
ADGRL3	1.953
MCM3	1.88
FAM155B	1.835
LNPEP	1.83
CES2	0.5603
ZNF664	1.892
DCN	0.5703
STIL	1.876
TIMELESS	1.951
PRKACB	1.85
EMP2	0.5181
SETMAR	1.78
ZNF614	1.812
RNF38	1.812
ABCA5	1.848
PHOSPHO1	0.5193
PTX3	1.831
CDNF	0.5552
ZNF432	1.847
DCLK1	1.854
FGGY	0.5215
LMBR1L	0.521
GEMIN4	1.888
PCGF5	1.831
ZCCHC14	1.809
UHRF1	1.843
EPHB6	1.936
PRKAA1	1.839
TMEM108	1.838
GFOD1	1.89
SH3TC2	1.896
GJC3	1.857
OSTM1	1.86
MED8	0.5364
CRIP2	0.5518
CMTM8	0.5339
CASP3	1.794
TWSG1	1.817
CARD9	1.909
KIAA1456	0.5447
ASIC2	1.833
LARP7	1.858
CBX1	1.909
SPEG	0.5221
HMGCR	1.878
ATG2B	1.817
MYOM1	0.5342
DSTYK	1.827
MIA3	1.898
TANC1	1.889
CYP20A1	1.834
HYOU1	1.841
COQ10B	1.798
TNPO2	1.904
G2E3	1.819
JAM2	0.5513
FAM57A	1.873
DALRD3	0.5314
LRP12	1.862
RAB8B	1.789
HECTD1	1.782
TERT	1.792
NFYA	1.869
GPAM	1.796
CRYBG3	0.562
BBX	1.825
NKAIN1	1.847
USP38	1.816
PDP2	1.86
CSGALNACT1	0.5511
TAGLN2	0.539
SMIM15	1.889
ARHGAP17	0.5415
CACNA1H	0.5522
ARHGEF39	1.833
FHL5	0.5508
PHKA1	1.809
ARID5B	1.848
ZNF644	1.813
HINT2	0.5443
ZC4H2	0.5247
NONO	1.861
MYO9A	1.795
ADAM10	1.806
RGS6	0.5685
IFIT5	1.891
FAF2	1.865
MFN2	0.5419
NFXL1	1.902
ITGB1	1.832
LMLN	1.811
EGFL7	0.5693
AP3M1	1.852
SOAT1	1.793
SH3BP5	0.5446
OSBPL8	1.794
GPR162	1.751
RDH11	1.806
RBL1	1.813
EVA1C	0.5285
TTK	1.832
DSCC1	1.834
PNMA8A	1.859
CRY1	1.817
MVB12B	1.914
2020-03-01	0.5392
INPP5F	1.833
SORCS2	1.902
FZD4	0.5691
ADGRL2	1.861
RIPK1	1.85
JHY	0.5296
CISH	0.5619
SERPINH1	1.817
MAN1C1	0.544
STAU2	1.847
CD164L2	0.5369
HDAC2	1.876
STAT5B	0.5526
GALNT16	1.884
CHPT1	0.5604
ADAT1	1.877
XRRA1	1.892
NSUN2	1.869
RFC4	1.834
HSD11B1L	1.839
ABCA1	1.777
CBL	1.791
RELN	1.872
ATP8B4	1.801
MTFR2	1.862
CALHM6	1.849
ZNF292	1.767
ZKSCAN2	1.884
PRKAB2	1.832
PDLIM3	0.5329
NFKBIA	0.5305
CA14	1.817
MYEF2	1.86
ZNF174	1.822
SEMA3B	0.5522
SNX18	1.837
TGFBI	0.5318
KLHL42	1.736
HSPB7	0.5478
RGS4	1.836
AASDH	1.853
SEMA5A	1.885
GEMIN5	1.833
NT5DC2	1.837
LARP1B	1.815
FITM2	1.834
NSD2	1.86
ECT2	1.826
IGSF11	1.784
KIF13B	1.848
NUP133	1.82
LRRC2	0.5358
HACD4	0.557
TNPO1	1.8
SBSPON	0.5467
ARSG	0.5559
TM4SF18	1.866
GALNT18	0.5569
LIMS1	1.811
BMS1	1.823
RELL2	1.824
SIAE	0.5594
PKN2	1.774
SLC22A4	0.5468
KLHL23	1.823
ZNF700	1.831
KIF3A	1.771
EIF3A	1.826
NSUN7	0.5396
COL2A1	1.812
DPY19L4	1.763
CD46	0.5321
KLHL5	1.836
TP53I11	0.5479
RASSF9	1.787
HID1	0.5465
HACD1	1.813
STAG2	1.769
SCLT1	1.808
KYAT1	0.5689
UBA3	1.805
GARS	1.762
GMCL1	1.839
RLF	1.8
PER2	0.5653
DNAH1	1.79
STN1	1.807
ANAPC7	1.77
NCDN	1.79
PINX1	1.783
JADE2	0.5383
JUN	0.5392
PNP	0.5539
SYNJ1	1.801
SLC7A1	1.804
FBXO33	1.821
C10orf10	0.5731
SCAMP1	1.798
LALBA	0.5399
KLHL36	0.5515
MRAS	1.805
OSBPL11	1.781
ZNF713	1.798
HIPK1	1.77
KRAS	1.747
CACFD1	1.875
ZFAND4	1.812
KIF24	1.838
ERCC2	1.88
ZSCAN31	1.871
CDK1	1.809
ZNF691	0.5613
ZRANB1	1.828
UGDH	1.815
MOB2	0.5499
SKAP2	1.749
NCS1	1.884
DUSP5	1.739
USP53	1.718
QTRT2	1.796
ACAD8	0.5544
SNORD48	1.832
PGM3	1.795
TTYH3	1.847
SYDE2	1.868
CCNDBP1	0.5756
PTPDC1	1.832
SMYD2	0.542
PRSS22	0.5456
CENPI	1.819
VWCE	0.5523
ATP5S	0.5496
DVL3	1.881
DISC1	1.777
LRP8	1.782
UBXN1	0.5438
ZNF518A	1.782
SH3RF1	1.809
RUNX1	1.815
TRIP13	1.879
COL27A1	1.828
ENPP4	1.78
SYTL3	0.5237
STRN3	1.771
ACTR3	1.766
HUNK	1.832
PRSS23	1.756
TMEM140	0.5454
SLC25A30	0.5737
PROKR2	0.5487
SMARCAD1	1.797
SGCB	1.756
TFPI2	1.748
RPL18A	0.5507
PRRC2A	1.818
UBE2T	1.777
FBXL19	1.832
SBSN	0.5603
HTRA3	0.582
STAT5A	0.5566
SEC23IP	1.781
PNMT	0.5531
CORO2B	0.5493
IMPACT	1.753
BRAP	1.788
SLC46A2	0.5507
FBN2	1.805
NUP58	1.783
LRRC46	1.845
ARL4C	1.835
MED13L	1.799
LMNB2	1.796
GORASP2	1.863
KIAA1841	1.809
ZBED4	1.809
LRRIQ1	0.5494
KIAA0100	1.839
PEAR1	0.574
PRUNE2	1.762
AGRN	1.827
SEC24D	1.821
TBRG1	0.5539
CAVIN2	0.5606
ATAD5	1.819
ITGB1BP1	0.5625
C18orf54	1.806
KBTBD2	1.805
SLC39A10	1.77
REEP2	1.796
ABHD12B	1.747
DHRS3	0.5558
IKZF2	1.783
MC5R	0.5763
CAVIN1	0.5567
SHE	0.5794
FGF10	0.5793
WDFY1	1.816
EIF5A2	1.737
FUT11	1.809
RNMT	1.759
TNS4	1.784
EIF2AK2	1.738
KIF22	1.817
GALM	0.5493
ZNF570	1.829
GPD2	1.771
PHLDA1	1.764
SYAP1	1.828
RNF145	1.804
CNRIP1	0.5838
EPHA7	1.854
ASPM	1.776
TSGA10	1.821
FLRT2	1.755
CNOT8	1.777
FOXM1	1.817
PTPRD	0.5767
TSPAN18	1.755
TMED5	1.751
DENND6A	1.743
PTPRG	1.774
EIF4G1	1.82
PRDM16	0.5616
PLEKHA4	1.84
EGF	0.5527
GCN1	1.82
LPGAT1	1.804
FBXO45	1.812
ABHD14B	0.5461
NUDCD2	1.832
CSN1S1	0.5542
ZNF532	1.783
IGSF5	0.5225
SERPINE2	1.792
SDC2	0.5522
ARG1	1.843
DYNC1LI2	1.761
STX2	1.804
AP1S2	1.727
AP2M1	1.848
POLR3G	1.751
SLC30A6	1.759
TIMP3	1.825
NOC3L	1.761
ZNF470	1.768
TFAP2B	0.5598
ASPH	1.803
KAT5	0.5512
UBE2E1	1.76
RHOF	1.818
CD99	0.5549
OSMR	1.824
USP6NL	1.748
DHX29	1.756
RIF1	1.763
NXPE3	1.82
MRGPRF	0.5644
SPTLC3	1.771
GNG7	1.759
USP16	1.807
STK17B	1.774
HOXC8	0.5486
BUB3	1.785
CLDN12	1.823
YPEL3	0.5725
ZMYM4	1.741
PLCH1	1.787
CDC25C	1.825
TGIF2	1.822
CACNA1I	0.5587
TMEM199	1.768
RABGAP1	1.803
TMEM219	0.571
BRWD1	1.769
BAZ1A	1.752
YES1	1.765
PRKDC	1.775
CATSPER2	0.5774
ZNF571	1.811
DENND5B	1.738
CHTF18	1.809
CHST15	0.5534
ADA	0.5817
C8orf37	0.5872
YDJC	1.72
ADCY5	1.775
MAGI2	1.786
TNFSF12-TNFSF13	0.5808
ADGRG6	1.742
POLL	1.791
BHMT2	0.569
CEP55	1.758
ATP11B	1.739
USP33	1.755
CACNA2D1	1.724
PHF5A	1.807
RORC	0.5547
TIE1	0.5774
LDB2	0.5646
CACNA1C	1.773
ZDHHC2	1.744
FAM102B	1.761
VEZT	1.747
BICDL1	1.792
SLC43A2	0.5592
G3BP1	1.747
NCK2	1.788
KIAA1468	1.723
DCAKD	1.789
NDST3	1.804
NR6A1	1.77
KIAA1755	1.781
DSE	1.744
SIGIRR	0.5611
BRCA2	1.78
PSAT1	1.791
ATR	1.78
SLC4A7	1.763
ADGRG1	1.77
CACNA2D3	1.752
KPNA5	1.765
NUP205	1.77
USP46	1.785
TDRD3	0.5599
GSDME	1.779
CLIP2	1.829
DNPH1	1.781
MATN4	1.789
MLEC	1.788
DOCK10	1.735
CERS4	0.5756
ENKD1	0.5789
KLF4	0.5532
IMPAD1	1.735
SH3PXD2B	1.789
MXD3	1.81
SH2D4A	0.5659
SAMD8	1.744
TP53INP1	1.755
SKP2	1.793
VEGFA	1.785
SFRP1	1.838
USP42	1.734
ENDOU	0.5549
PSMB8	0.5342
TMEM200B	0.5742
UBE2S	1.757
PDE3B	0.565
COX15	1.748
BMPR2	1.776
PDCD11	1.806
PRDM5	1.776
METTL1	1.744
ARHGAP10	0.5601
ABI2	1.772
SCAMP2	0.549
CIP2A	1.745
ANXA6	1.822
LSAMP	1.751
PELI1	1.761
EIF4G2	1.75
CSDC2	1.783
PRPSAP2	0.5453
SLC44A1	1.763
RIOK1	1.775
CEP70	1.746
VAV1	1.803
MMP11	1.724
LAMP1	0.5582
ABHD15	1.796
RHOT1	1.752
VPS13C	1.731
RNF6	1.711
NT5C2	1.754
TMED10	1.753
CCL8	1.762
RASA1	1.725
SDR16C5	0.5671
MUC15	0.5539
C15orf39	0.5678
MDM4	1.755
LANCL1	1.734
TTC13	1.764
KAT8	0.579
GFRA2	0.5615
FZD7	1.786
DCP1B	0.5811
TESK2	0.5953
DUSP4	1.787
LRRC15	0.5751
FAM122B	1.78
ZDHHC23	1.771
AGPS	1.74
MEIS2	0.5821
DUSP1	0.5382
CTHRC1	1.683
SORBS3	0.5692
BOLA3	0.5621
AGTR1	0.591
TACC3	1.783
TIAM2	1.81
PLCG1	1.806
CYP27B1	1.746
ZBTB4	0.5829
HMBOX1	1.748
CREM	1.715
CTDSP1	0.5723
CENPA	1.734
OGFRL1	1.732
CHST3	1.774
RANBP9	1.807
HEPACAM2	0.563
PARP6	0.5779
ZDHHC16	1.789
NEMP1	1.781
ERP29	1.733
C6orf136	0.5797
RBPJ	1.749
RPA1	1.804
USP35	1.775
PRIM1	1.809
SLC13A1	0.5585
PRKRA	1.745
PTK7	1.787
SCUBE2	0.5899
ARHGAP6	0.5735
RTTN	1.739
RAB31	1.751
SDC3	1.754
SMAD4	1.775
DNTTIP2	1.752
SLC36A2	0.56
GLDC	1.761
FOXP4	1.757
COG3	1.719
RWDD4	1.785
RHOU	1.78
WDR11	1.729
TASP1	1.7
WDHD1	1.723
RAI14	1.71
SPP1	1.739
CMBL	0.56
DUSP19	1.728
DCUN1D4	1.729
ALAS1	0.5552
CAMSAP2	1.7
XPNPEP1	1.734
CWF19L2	0.5893
CASK	1.752
ADAM33	0.5857
CENPK	1.729
AGO2	1.748
CEP85L	1.759
SLC30A7	1.68
URI1	1.74
HEMK1	0.5694
ELK1	1.814
CUL3	1.738
PLA1A	0.5688
MAPK1IP1L	1.724
SLC23A2	1.809
PALB2	1.769
SPIDR	1.713
CLCN3	1.708
PDPN	0.5959
TJP3	0.5483
VPS11	0.5581
VAV2	1.737
ARHGAP27	0.5474
NUP160	1.726
ANO5	1.759
TXLNG	1.754
CYLD	1.708
CACNA1D	1.7
ECHS1	0.5962
SESN3	1.741
CDT1	1.732
PPP4R3B	1.722
ASCC3	1.7
DYNC1H1	1.776
DIABLO	1.76
TNFRSF18	0.5612
GRK6	1.834
ABHD16A	0.5755
PHEX	1.724
ESRRB	0.5722
KLHL15	1.631
SLITRK3	0.5781
MTFR1	1.739
MAPRE3	0.5768
ERC1	1.75
HCFC2	1.692
CREG1	0.569
RRN3	1.706
RACGAP1	1.736
RNF44	1.753
DENND2C	1.692
PEX26	0.5742
ZFP28	1.72
ATP8B1	1.73
PECAM1	0.5948
ADAM11	1.76
TSEN54	1.791
CDK7	1.741
ATXN7L3	1.747
TMEM248	1.728
FAU	0.5872
RTCB	1.788
EVI5L	1.791
PEBP4	0.5687
CLPB	1.716
HMCN2	0.602
TBC1D32	1.7
N4BP2L1	0.5816
LCA5	1.728
SLC6A7	0.5812
DDX18	1.729
PTS	0.5869
TMEM79	0.5485
TET2	1.698
DFFA	0.5897
SOBP	1.767
VANGL2	1.74
AHCYL2	1.773
ACSS1	0.5829
CYGB	0.5972
CIART	1.728
ZNF423	0.585
LRIF1	0.5853
FOXN2	1.707
TROAP	1.732
CENPW	1.706
STK39	1.803
FAT2	1.757
TRAIP	1.77
CNTN3	0.5969
CCNB1	1.691
VRK2	1.71
C12orf45	1.77
MAMDC2	0.564
HIC1	0.5924
POLR3A	1.775
CHP1	1.695
SLC12A8	1.7
PICK1	1.733
SPIN1	1.732
VAMP3	0.5746
XPR1	1.669
SEMA7A	1.669
PRPF4B	1.697
SQLE	1.745
EPS8	1.729
HLF	0.6081
CD3EAP	1.699
CCDC107	0.5732
CSN2	0.5716
GOLIM4	1.762
NUPR1	0.5847
KIRREL1	1.79
CCDC69	0.5905
SSBP2	0.5829
ZNF277	1.715
PARP11	1.761
USP5	1.774
MIS18A	1.712
PYROXD1	0.5944
ASAP2	1.755
SPRED2	0.5705
PRR15L	0.549
TMEM132A	1.764
TENM3	1.713
MMAB	1.699
MN1	0.5952
DCHS1	1.744
SUFU	1.699
TNFRSF21	1.737
ZSCAN29	1.723
HDAC9	1.75
POLR1B	1.721
CHD6	1.735
ZDHHC21	1.715
TNFRSF14	0.5634
ALDH1A1	0.5716
APBB2	1.672
KCNQ2	0.565
IGFBP6	0.5718
COQ4	1.763
GGCX	1.738
FGD6	1.669
BEND3	1.771
MT-CYB	0.5607
LEPR	1.66
BAMBI	1.741
CD34	0.5897
LAMC1	1.786
MYO1D	1.682
CNST	1.731
TSR1	1.742
NIPAL4	1.72
MELK	1.702
DOPEY1	1.69
OLFML2B	1.706
RILP	0.5894
MOB3B	0.5911
LYSMD1	1.726
SMARCA5	1.695
ATP2B4	1.722
TUBG1	1.731
ZNF74	1.752
EFHC1	0.5927
SKAP1	0.5501
WWP2	1.695
POLH	1.719
LSP1	0.5987
FBXO2	0.5711
MIS18BP1	1.698
P4HA2	1.695
CKB	1.768
BICC1	1.701
CNTNAP5	1.716
TIMM8A	1.733
EPRS	1.694
RASIP1	0.5948
ERCC6L2	1.666
GTF2IRD1	1.743
RNF2	1.72
TMEM19	1.704
BHLHA15	0.5724
USP49	1.75
GK5	1.675
SHPRH	1.695
ESRP2	0.5718
PDZD2	1.781
TRPV6	0.5675
ETFBKMT	0.5849
GABARAP	0.5588
STK33	0.5936
MAN2A1	1.676
DCUN1D1	1.679
TBX15	0.6124
TRMT6	1.678
GCOM1	0.5947
CDC26	0.5834
CEP350	1.622
MDGA1	0.5918
KIF26B	1.707
MTR	1.719
PITRM1	1.684
NKRF	1.699
HSPBP1	1.743
NET1	0.5737
RNF128	0.5998
FLNA	1.779
PPCS	0.5716
ZC3HAV1L	1.712
MCOLN1	0.5779
TRMT12	1.737
SHTN1	1.692
HINT3	1.702
MCM5	1.718
GOSR1	1.707
BNIP3L	1.682
EMG1	0.5872
MAGED2	1.758
POLR3B	1.7
IL1RAP	1.619
THAP9	1.709
OLFML1	0.6083
FAIM2	0.5966
SMARCA4	1.763
CSF2RA	1.753
FARP1	1.69
MCRS1	0.5787
CNP	1.718
ARMC2	1.728
ESR1	0.5879
XRN2	1.711
IQCJ-SCHIP1	1.7
TMEM87B	1.68
COL28A1	0.6026
ITPR2	1.639
ZNF16	1.696
IPO7	1.693
NLK	1.703
LRRCC1	1.656
VEZF1	1.711
XPO1	1.697
PCGF6	1.667
CLSTN1	0.5731
DOLPP1	1.719
LZTFL1	0.5942
TOR1B	1.739
ORAI1	0.5932
PDE1C	1.677
BTF3	0.5776
C11orf68	0.5925
DMXL1	1.661
MFSD13A	1.72
ANGPTL1	0.6049
ABTB2	1.719
ASB1	1.702
2020-03-03	0.5566
NFE2L3	1.733
SOX18	0.6
SNORD45C	1.699
CCDC43	1.759
GINS2	1.695
TADA2B	0.5802
RANBP17	1.673
OTUD6B	1.667
ALOXE3	0.5932
RAPGEF2	1.633
BHLHE41	1.72
GYG2	0.5756
MAPK15	0.5979
CAMTA1	1.685
PLXNC1	1.662
GSN	0.5997
OLR1	1.704
DENND4C	1.622
C11orf84	1.705
ATRX	1.618
TMEM131L	1.7
RAMP2	0.6054
LAPTM4A	0.6138
TTC12	0.5627
PMS2	1.679
NRBF2	0.5907
RTN4RL1	0.587
NCAPH	1.728
ARMCX2	1.704
[truncated: 1,989 more rows]
