# Supplementary material for: Modeling molecular development of breast cancer in canine mammary tumors
Source: HighWire-hosted journal article supplement (doi:10.1101/gr.256388.119), 2020-12-23
Supplement: Supplemental_Table_S3.xlsx [file Supplemental_Table_S3.xlsx]

## Sheet: (A) Normal-Carcinoma DEG GO
Supplemental Table S3: Network-based enrichment of GO processes in the normal-carcinoma CMT comparison (A) and for each PEP (B, C).
GO_VERSION	releases/2018-05-14
NETWORK_NAME	mammary epithelium
NETWORK_VERSION	8e3e751d361e286af5effc31f5f0fcab8678a9db
CLUSTER_NAME	CLUSTER_GENES
M1	RFC4,AURKA,FLNA,CENPJ,CDT1,DIAPH3,HAUS8,ADCY3,CACNA1H,G3BP1,LRR1,DZIP1,CDCA7,NUP155,TTC3,CENPW,DBN1,ACTR3,BUB3,LRP12,TIMP3,KIF18B,PSIP1,WDHD1,CENPL,HSD17B7,KIF22,KPNB1,KIF11,WDR3,SKA3,WDR12,ASCC3,FOXM1,ZMPSTE24,FAM83D,EPHB6,STX2,POLR3G,NDC80,CPQ,KNL1,SPC24,ICE1,CCT2,EIF2S1,MXD3,CDCA3,CALD1,DNA2,SUZ12,CIT,BUB1,VRK2,SLC16A1,MKI67,NUP133,MRGBP,GCN1,NEK2,STAT5B,DCLRE1B,DEPDC1,CENPK,ASPM,CEP76,NUP50,K…
M2	GPRIN1,TASP1,ABHD10,FERMT1,LSG1,LPP,HIPK2,SLC35B4,TMEM87B,SLC35A3,SLC44A1,UEVLD,PPP6R3,FBXW7,RAB10,ZC3HAV1L,TTC17,LLGL1,OSCP1,ITPRIP,ZC4H2,IGDCC4,ZNF629,IL18R1,MYO19,EBF3,BMP2K,FAM200A,SRRD,NOP58,TRMT6,CAND1,RELCH,LGALS12,FBXO11,ARHGEF19,COQ4,ASB6,USP31,BAG5,CNOT6,ISCA2,TMEM263,SLC39A10,EPHA7,CALHM6,ACAD11,FADS2,RANBP17,INTS2,ZNF70,ZNF614,CLEC3A,NSUN2,UHRF1BP1,CBLN3,TMEM8A,GPR155,KATNAL1,CIART,SL…
M3	KIF16B,MALT1,TRIM27,XPNPEP2,XPNPEP1,LMAN1,LLGL2,FADS1,ITGB1,CDKL5,SEPT2,IL1RL2,NEDD9,ANPEP,KIAA0895,AMPD2,PPP1R12A,RSL1D1,NFIL3,KAZALD1,VPS4B,CACNA2D2,GOSR1,ADCY2,NDUFA4L2,ADAM10,BTBD3,SEMA3B,NIT1,EPHA1,EPHB2,EPHB3,TJP2,CX3CL1,SPON2,RFC1,RAPGEF3,REEP2,INPP5F,SEC31A,TRIP12,TRIP11,FEZ2,TOP3B,EOGT,RBPJ,GGT5,CHORDC1,STX1A,STRN,ARFGEF1,MED8,FARP1,SLK,WISP2,RASSF9,MDFIC,SOX17,STRN3,CSF2RA,GOLM1,TIA1,PP…
M4	DOCK10,RNF168,BICC1,GTF3C4,WISP3,SYT16,ZNF571,FOXJ1,ZFP2,CCL19,BTN1A1,CLEC5A,CHST1,PRG4,CARD9,NDST3,TIGD1,ZNF391,FAAP24,MIOX,GPR162,SPP2,APOL5,CCR5,SVOPL,PDE6H,C14orf93,SYDE2,SLC30A3,NKAIN1,VWC2,KCP,CACNA2D3,ZNF713,TONSL,ADGRA3,TRPM4,CHGA,CSN3,SHANK1,CNNM4,SULT4A1,ZNF570,CCNT1,BAIAP3,DZANK1,ATP8B4,CDR2L,USP27X,PKD1L3,PLXNB3,RGS9,MATN4,MARC1,ARMC6,TMEM59L,TNN,CD180,MRM1,GCGR,MMP13,MMP17,POLL,BRSK1…
CLUSTER_NAME	TERM_NAME	GO_ID	TERM_Q_VALUE	GENE_COUNT	TERM_GENES
M2	anion transport	GO:0006820	0.0674758	23	SLC37A1,THBS1,SLC35A3,SLC25A42,TTYH1,GOPC,RIPK1,SLC36A4,SLC26A2,SLC35B4,SLC25A13,OSBPL8,ANO1,LRRC8A,TMEM30A,SLC4A11,ANO5,ATP8B1,TTYH3,SLC44A4,WNK3,ANO8,XPR1
M2	vacuole organization	GO:0007033	0.072632	11	HOOK1,RAB23,GNPTAB,STX17,SMCR8,RAB3GAP1,RAB3GAP2,HOOK3,UBQLN1,CCDC115,TMEM199
M2	endomembrane system organization	GO:0010256	0.0130632	24	RAB10,RBSN,RAB3GAP1,HOOK3,HOOK1,CLASP1,PACSIN1,ARHGAP21,SQSTM1,RAB43,RAB3GAP2,BAG5,ARFGEF2,WHAMM,TOR1B,LNPK,COG3,STX17,SEC61A1,REEP3,USP6NL,TMEM33,EXOC8,RAB33B
M2	G-protein coupled receptor signaling pathway	GO:0007186	0.00334203	4	CMKLR1,RPGRIP1L,DGKH,ADCY5
M2	peptide secretion	GO:0002790	0.0937143	7	ANO1,TCF7L2,DHX36,ADCY5,MCU,RSAD2,OLFM2
M2	leukocyte migration	GO:0050900	0.0365887	2	CMKLR1,ROCK1
M2	cell activation	GO:0001775	0.00109759	4	TMEM131L,THBS1,TWSG1,ARG1
M2	chemotaxis	GO:0006935	0.0660865	5	CMKLR1,ROBO2,NOTCH1,DOCK4,THBS1
M2	leukocyte activation	GO:0045321	0.006909	4	TMEM131L,THBS1,TWSG1,ARG1
M2	regulation of response to external stimulus	GO:0032101	0.074842	10	ADAMTS12,CLASP1,ROBO2,THBS1,NOTCH1,SERPINE2,CMKLR1,CD109,CASK,ARG1
M2	taxis	GO:0042330	0.0660865	5	CMKLR1,ROBO2,NOTCH1,DOCK4,THBS1
M2	regulation of secretion by cell	GO:1903530	0.0883464	9	ANO1,CLASP1,MCU,DHX36,ADCY5,RAB21,TCF7L2,RSAD2,RAB33B
M2	regulation of secretion	GO:0051046	0.0610792	9	ANO1,CLASP1,MCU,DHX36,ADCY5,RAB21,TCF7L2,RSAD2,RAB33B
M2	response to toxic substance	GO:0009636	0.0963018	3	RIPK1,GPX8,SLC30A4
M2	regulation of DNA metabolic process	GO:0051052	0.0969587	24	HMBOX1,SMG1,DHX36,TICRR,ESCO2,BMPR2,ZBTB38,ERCC4,MAPK1,ATR,SLF2,RBBP6,ABRAXAS1,KLHL15,TNKS2,PINX1,SMARCAD1,SPIDR,USP37,ESCO1,SLX4,GNL3,HELB,FBXW7
M2	peptidyl-serine modification	GO:0018209	0.029305	20	RIPK1,PAK1,NSD1,STK4,TGFBR1,ATR,TTBK2,SMG1,FNIP1,RICTOR,PRKX,UHMK1,CSNK1G3,GALNT16,POGLUT1,CSNK1G1,MAPK1,CLSPN,NTMT1,MAPK8
M2	macroautophagy	GO:0016236	0.0468009	15	VPS13C,USP36,RAB23,STX17,LARP1,YOD1,SMCR8,SQSTM1,SCOC,QSOX1,RAB3GAP1,RAB3GAP2,WDFY3,UBQLN1,SNAP29
M2	regulation of signaling receptor activity	GO:0010469	0.00771121	2	SOCS4,FBXW7
M2	epithelium development	GO:0060429	0.0904651	10	ADAMTS12,SH3BP1,PAK1,CLASP1,MYO9A,ROBO2,ROCK1,MPP5,PRKX,ARHGAP12
M2	epithelial cell differentiation	GO:0030855	0.0582659	4	SH3BP1,MYO9A,ROCK1,PRKX
M2	cellular response to cytokine stimulus	GO:0071345	0.076466	9	ADAMTS12,RIPK1,FOXO3,PNPT1,TRAF3,STAT3,ARG1,ERBIN,MYLK3
M2	positive regulation of cell adhesion	GO:0045785	0.0416565	3	DOCK1,DENND6A,DOCK5
M2	regulation of lymphocyte activation	GO:0051249	0.0870173	3	TMEM131L,TWSG1,ARG1
M2	lymphocyte activation	GO:0046649	0.0228655	3	TMEM131L,TWSG1,ARG1
M2	regulation of defense response	GO:0031347	0.0226539	6	ADAMTS12,CLEC7A,NONO,ERBIN,WDFY1,ARG1
M2	immune effector process	GO:0002252	0.000798318	3	ARG1,NCBP3,RSAD2
M2	cytokine-mediated signaling pathway	GO:0019221	0.0812705	4	TRAF3,FOXO3,STAT3,ARG1
M2	innate immune response	GO:0045087	0.0060673	5	POLR3A,NONO,ERBIN,WDFY1,ARG1
M2	defense response to other organism	GO:0098542	0.0182849	4	NOD1,ARG1,NCBP3,RSAD2
M2	regulation of cell activation	GO:0050865	0.0541026	4	TMEM131L,THBS1,TWSG1,ARG1
M2	regulation of leukocyte activation	GO:0002694	0.074598	4	TMEM131L,THBS1,TWSG1,ARG1
M2	regulation of multi-organism process	GO:0043900	0.0931601	9	LARP1,TMPRSS2,RSF1,PKN2,RSAD2,EXOC2,ZC3HAV1,FAM111A,ARG1
M2	negative regulation of cytokine production	GO:0001818	0.0736289	2	THBS1,TWSG1
M2	asparagine metabolic process	GO:0006528	0.0937143	2	ASNS,ASRGL1
M2	peptidyl-serine phosphorylation	GO:0018105	0.0724704	17	RIPK1,PAK1,NSD1,STK4,TGFBR1,ATR,SMG1,FNIP1,RICTOR,PRKX,CSNK1G3,TTBK2,CSNK1G1,MAPK1,CLSPN,UHMK1,MAPK8
M2	mRNA catabolic process	GO:0006402	0.0845325	13	CNOT6,CPEB3,FASTKD1,LARP1,TNRC6B,SMG1,PNPT1,ZC3HAV1,ELAVL1,UPF3B,TNRC6C,AGO1,AGO3
M2	regulation of chromosome organization	GO:0033044	0.0882303	21	SLX4,HMBOX1,NSD1,SART3,SPTY2D1,SLF2,SENP6,SMG1,DHX36,DYNC1LI1,MIER1,GNL3,HECW2,PINX1,C6orf89,NIPBL,ERCC4,MAPK1,TNKS2,PHF8,MAPK8
M2	regulation of system process	GO:0044057	0.0963018	3	DOCK4,DOCK5,CACNA1C
M2	regulation of DNA replication	GO:0006275	0.0963018	8	ATR,ESCO2,RBBP6,TICRR,ESCO1,ZBTB38,FBXW7,USP37
M2	DNA replication	GO:0006260	0.072904	13	ATR,ESCO2,PRIMPOL,FANCM,RBBP6,TICRR,ESCO1,MMS22L,ZBTB38,HELB,FAM111A,FBXW7,USP37
M2	macromolecule methylation	GO:0043414	0.0133498	21	WDR4,PRDM5,TRMT9B,DNMT3A,TET2,NSUN2,FBXO11,SETDB2,TET3,NDUFAF7,ATF7IP,KMT2C,FAM98A,TRMT6,SETD7,BCDIN3D,NSD3,NSD1,METTL16,TGS1,NTMT1
M2	covalent chromatin modification	GO:0016569	0.0405439	31	USP36,SART3,TET2,NIPBL,ATXN7L3,SETDB2,PHF20,EP400,C6orf89,NACC2,KDM4C,SUDS3,PCGF6,USP22,NTMT1,NSD1,KMT2C,SMARCAD1,SETD7,HUWE1,PHF8,MAPK8,USP49,PRDM5,USP16,MIER1,HCFC1,TET3,MYSM1,NSD3,MSL2
M2	methylation	GO:0032259	0.0046691	24	TRMT9B,TET2,SETDB2,TRMT6,MTR,DPH5,WDR4,NDUFAF7,ATF7IP,COQ5,NTMT1,NSD1,DNMT3A,KMT2C,FBXO11,FAM98A,SETD7,METTL16,PRDM5,NSUN2,BCDIN3D,TET3,NSD3,TGS1
M2	histone modification	GO:0016570	0.0345903	31	USP36,SART3,TET2,NIPBL,ATXN7L3,SETDB2,PHF20,EP400,C6orf89,NACC2,KDM4C,SUDS3,PCGF6,USP22,NTMT1,NSD1,KMT2C,SMARCAD1,SETD7,HUWE1,PHF8,MAPK8,USP49,PRDM5,USP16,MIER1,HCFC1,TET3,MYSM1,NSD3,MSL2
M2	positive regulation of transmembrane receptor protein serine/threonine kinase signaling pathway	GO:0090100	0.0664233	8	HIPK2,CDKN2B,TGFBR1,THBS1,BMPR2,TWSG1,SMAD2,SMAD4
M2	negative regulation of cellular component movement	GO:0051271	0.0838069	4	THBS1,NOTCH1,CLASP1,SCAI
M2	negative regulation of cell motility	GO:2000146	0.0928013	4	THBS1,NOTCH1,CLASP1,SCAI
M2	positive regulation of immune response	GO:0050778	0.029305	6	CLEC7A,NONO,ERBIN,EIF2B1,WDFY1,PDE4D
M2	positive regulation of cytokine production	GO:0001819	0.048252	6	POLR3A,RIPK1,ARFGEF2,DHX36,THBS1,PDE4D
M2	endoplasmic reticulum organization	GO:0007029	0.033755	7	SEC61A1,RAB10,RAB3GAP1,TOR1B,RAB3GAP2,LNPK,TMEM33
M2	response to virus	GO:0009615	0.036593	3	ZC3HAV1,NCBP3,RSAD2
M2	response to bacterium	GO:0009617	0.029305	4	NOD1,ERBIN,BAIAP2L1,MAPK8
M2	transforming growth factor beta receptor signaling pathway	GO:0007179	0.0696834	12	HIPK2,TGFBR1,CDKN2B,LEMD3,THBS1,PDPK1,PTK2,TWSG1,SMAD2,SMAD4,CD109,NLK
M2	positive regulation of cellular response to transforming growth factor beta stimulus	GO:1903846	0.0800703	4	THBS1,HIPK2,CDKN2B,SMAD4
M2	positive regulation of transforming growth factor beta receptor signaling pathway	GO:0030511	0.0800703	4	THBS1,HIPK2,CDKN2B,SMAD4
M2	positive regulation of secretion	GO:0051047	0.0988197	5	DHX36,ANO1,CLASP1,TCF7L2,MCU
M2	inorganic anion transport	GO:0015698	0.066477	12	GOPC,WNK3,ANO1,TTYH1,SLC4A11,LRRC8A,ANO8,SLC26A2,ANO5,TTYH3,SLC37A1,XPR1
M2	inorganic anion transmembrane transport	GO:0098661	0.0434635	10	ANO5,ANO1,SLC37A1,ANO8,SLC26A2,TTYH3,WNK3,SLC4A11,TTYH1,XPR1
M2	anion transmembrane transport	GO:0098656	0.00587952	21	GOPC,RIPK1,ANO5,ANO1,TTYH1,LRRC8A,WNK3,SLC36A4,ANO8,TMEM30A,SLC4A11,SLC26A2,SLC35B4,THBS1,TTYH3,SLC35A3,SLC44A4,SLC25A13,SLC25A42,SLC37A1,XPR1
M2	soft palate development	GO:0060023	0.0937143	2	TBX1,COL11A2
M2	centriole-centriole cohesion	GO:0010457	0.047419	4	SGO1,CNTLN,ODF2,NIN
M2	protein modification by small protein removal	GO:0070646	5.31869e-06	24	USP36,SART3,USP49,USP34,ATXN7L3,USP45,USP22,USP38,USP42,USP31,OTUD6B,OTUD1,YOD1,USP25,SENP6,USP46,USP35,USP37,USP16,ZRANB1,MINDY1,MYSM1,VCPIP1,WDR48
M2	protein deubiquitination	GO:0016579	2.09789e-06	23	USP36,SART3,USP49,USP34,ATXN7L3,USP45,USP22,USP38,USP42,USP31,OTUD6B,OTUD1,YOD1,USP25,USP46,USP35,USP37,USP16,ZRANB1,MINDY1,MYSM1,VCPIP1,WDR48
M2	RNA secondary structure unwinding	GO:0010501	0.090769	3	DHX36,AGO1,AGO3
M2	cytoplasmic mRNA processing body assembly	GO:0033962	0.047419	4	CNOT6,DDX6,ATXN2,CNOT6L
M2	protein deacetylation	GO:0006476	0.0711818	8	PRDM5,C6orf89,NACC2,MIER1,SUDS3,NIPBL,SMARCAD1,MAPK8
M2	protein deacylation	GO:0035601	0.0859906	8	PRDM5,C6orf89,NACC2,MIER1,SUDS3,NIPBL,SMARCAD1,MAPK8
M2	histone deacetylation	GO:0016575	0.029305	8	PRDM5,C6orf89,NACC2,MIER1,SUDS3,NIPBL,SMARCAD1,MAPK8
M2	protein O-linked glycosylation	GO:0006493	0.0578758	7	POMGNT1,TET2,GXYLT1,GALNT16,C1GALT1C1,TET3,POGLUT1
M2	cilium assembly	GO:0060271	0.0626506	17	SCLT1,CEP41,MKKS,TCHP,CEP89,TTBK2,FAM161A,SNAP29,CEP97,DNAL1,RAB23,IFT81,WDR35,CCDC88A,EVI5L,DNAH1,SPAG16
M2	cilium organization	GO:0044782	0.0304065	19	SCLT1,CEP41,MKKS,TCHP,CEP78,CEP89,DNAL1,TTBK2,FAM161A,SNAP29,CEP97,TTC17,RAB23,IFT81,WDR35,CCDC88A,EVI5L,DNAH1,SPAG16
M2	protein localization to endoplasmic reticulum	GO:0070972	0.0370402	6	ANKRD13C,SEC61A1,RAB10,HSPA5,RAB3GAP1,RAB3GAP2
M2	drug transport	GO:0015893	0.0963018	9	SLC44A4,RIPK1,SLC36A4,TMEM30A,SLC25A42,SLC25A13,SLC25A26,SLC4A11,ATP8B1
M2	lipoprotein metabolic process	GO:0042157	0.0983324	8	ZDHHC21,ZDHHC2,ZDHHC20,ZDHHC6,RAB3GAP1,RAB3GAP2,PIGG,ZDHHC16
M2	negative regulation of anoikis	GO:2000811	0.0931727	4	PIK3CA,PTK2,PDK4,NOTCH1
M2	anoikis	GO:0043276	0.0983324	5	PIK3CA,PTK2,ANKRD13C,PDK4,NOTCH1
M2	regulation of anoikis	GO:2000209	0.0666055	5	PIK3CA,PTK2,ANKRD13C,PDK4,NOTCH1
M2	tRNA modification	GO:0006400	0.0734388	6	WDR4,TRMT9B,NSUN2,TYW5,QTRT2,CDKAL1
M2	RNA modification	GO:0009451	0.0460045	10	WDR4,TRMT9B,NSUN2,BCDIN3D,TYW5,QTRT2,TRMT6,METTL16,TGS1,CDKAL1
M2	ncRNA processing	GO:0034470	0.0785074	16	WDR4,USP36,TRMT9B,UTP15,NSUN2,BCDIN3D,TYW5,QTRT2,RIOK1,CDKAL1,TRNT1,INTS2,AGO1,AGO3,RPP14,TSEN54
M2	tRNA processing	GO:0008033	0.0519805	9	WDR4,TRMT9B,NSUN2,TYW5,QTRT2,TSEN54,TRNT1,RPP14,CDKAL1
M2	RNA methylation	GO:0001510	0.0963018	7	WDR4,TRMT9B,NSUN2,BCDIN3D,TRMT6,METTL16,TGS1
M2	membrane docking	GO:0022406	0.0519805	5	SNAP29,SYTL2,PDZD8,ROCK1,STX17
M2	drug transmembrane transport	GO:0006855	0.0370482	8	RIPK1,SLC36A4,TMEM30A,SLC25A42,SLC25A13,SLC25A26,SLC4A11,ATP8B1
M2	histone deubiquitination	GO:0016578	0.00479576	7	USP36,SART3,USP49,USP16,ATXN7L3,MYSM1,USP22
M2	cellular transition metal ion homeostasis	GO:0046916	0.0980817	6	SLC30A4,ATP6V0A2,TMEM199,SLC30A5,CCDC115,SLC30A9
M2	protein K48-linked deubiquitination	GO:0071108	0.0601513	6	USP25,MINDY1,YOD1,USP34,VCPIP1,USP37
M2	carbohydrate derivative transport	GO:1901264	0.0541026	6	RIPK1,SLC37A1,SLC35B4,SLC35A3,PLEKHA8,SLC25A42
M2	aggrephagy	GO:0035973	0.0715184	3	WDFY3,UBQLN1,SQSTM1
M2	organelle localization by membrane tethering	GO:0140056	0.0379456	4	STX17,SYTL2,SNAP29,PDZD8
M2	retrograde transport, plasma membrane to Golgi	GO:0035526	0.0519805	2	USP6NL,RAB43
M2	regulation of vascular smooth muscle contraction	GO:0003056	0.0519805	2	DOCK4,DOCK5
M2	negative regulation of vascular smooth muscle contraction	GO:1904694	0.0519805	2	DOCK4,DOCK5
M2	negative regulation of smooth muscle contraction	GO:0045986	0.0519805	2	DOCK4,DOCK5
M2	negative regulation of vasoconstriction	GO:0045906	0.0937143	2	DOCK4,DOCK5
M2	negative regulation of cilium assembly	GO:1902018	0.090769	3	EVI5L,TCHP,CEP97
M2	establishment of protein localization to endoplasmic reticulum membrane	GO:0097051	0.00762337	3	RAB3GAP1,RAB10,RAB3GAP2
M2	endoplasmic reticulum tubular network organization	GO:0071786	0.0370307	5	LNPK,TMEM33,RAB10,RAB3GAP1,RAB3GAP2
M2	establishment of protein localization to endoplasmic reticulum	GO:0072599	0.0582659	4	RAB10,RAB3GAP1,RAB3GAP2,SEC61A1
M2	nuclear-transcribed mRNA poly(A) tail shortening	GO:0000289	0.0379456	4	CNOT6,CPEB3,TNRC6C,TNRC6B
M2	regulation of nuclear-transcribed mRNA poly(A) tail shortening	GO:0060211	0.090769	3	TNRC6B,CPEB3,TNRC6C
M2	positive regulation of nuclear-transcribed mRNA poly(A) tail shortening	GO:0060213	0.090769	3	TNRC6B,CPEB3,TNRC6C
M2	protein lipidation	GO:0006497	0.0614098	8	ZDHHC2,ZDHHC21,ZDHHC20,ZDHHC6,RAB3GAP1,RAB3GAP2,PIGG,ZDHHC16
M2	lipoprotein biosynthetic process	GO:0042158	0.0614098	8	ZDHHC2,ZDHHC21,ZDHHC20,ZDHHC6,RAB3GAP1,RAB3GAP2,PIGG,ZDHHC16
M2	positive regulation of endoplasmic reticulum tubular network organization	GO:1903373	0.020445	3	LNPK,RAB3GAP1,RAB3GAP2
M2	regulation of endoplasmic reticulum tubular network organization	GO:1903371	0.00290036	4	LNPK,TMEM33,RAB3GAP1,RAB3GAP2
M2	nucleotide-sugar transmembrane transport	GO:0015780	0.0519805	2	SLC35B4,SLC35A3
M2	pyrimidine nucleotide-sugar transmembrane transport	GO:0090481	0.0519805	2	SLC35B4,SLC35A3
M2	UDP-N-acetylglucosamine transmembrane transport	GO:1990569	0.0519805	2	SLC35B4,SLC35A3
M2	protein palmitoylation	GO:0018345	0.0983324	5	ZDHHC20,ZDHHC2,ZDHHC16,ZDHHC6,ZDHHC21
M2	protein K33-linked deubiquitination	GO:1990168	0.0937143	2	YOD1,ZRANB1
M2	post-translational protein acetylation	GO:0034421	0.0937143	2	ESCO2,ESCO1
M2	DNA replication, synthesis of RNA primer	GO:0006269	0.0937143	2	PRIMPOL,HELB
M4	G-protein coupled receptor signaling pathway	GO:0007186	0.0359825	5	CCR5,PICK1,GCGR,BAIAP3,ADGRG3
M4	cation homeostasis	GO:0055080	0.0937143	4	CNNM4,CCR5,CCL19,SLC30A3
M4	metal ion homeostasis	GO:0055065	0.0793983	4	CNNM4,CCR5,CCL19,SLC30A3
M4	inorganic ion homeostasis	GO:0098771	0.0963018	4	CNNM4,CCR5,CCL19,SLC30A3
M4	cellular chemical homeostasis	GO:0055082	0.0963018	4	BAIAP3,CCR5,CCL19,SLC30A3
M4	sensory perception of taste	GO:0050909	0.072632	2	ASIC2,PKD1L3
M4	sensory perception of chemical stimulus	GO:0007606	0.076466	2	ASIC2,PKD1L3
M4	sensory perception	GO:0007600	0.0800703	3	SHANK1,ASIC2,PKD1L3
M4	sensory perception of sour taste	GO:0050915	0.00424538	2	ASIC2,PKD1L3
M4	response to alcohol	GO:0097305	0.085071	2	CCR5,CCL19
M4	double-strand break repair	GO:0006302	0.0965506	3	TONSL,RNF168,POLL
M4	monoamine transport	GO:0015844	0.0176594	2	CHGA,PICK1
M4	regulated exocytosis	GO:0045055	0.0968846	2	CHGA,BAIAP3
M4	cytokine production involved in immune response	GO:0002367	0.076466	2	CHGA,TRPM4
M3	small GTPase mediated signal transduction	GO:0007264	0.076466	15	NCKAP1,CUL3,RB1,MFN2,ADGRG1,RAPGEF3,ROBO1,ABCA1,NOTCH2,CD2AP,SHOC2,SRC,FBP1,PLCE1,RAPGEF2
M3	vesicle organization	GO:0016050	0.0515526	15	SYNJ1,CUL3,RAB1A,SEC24D,MIA3,RAB22A,ABCA1,SEC23A,AP2M1,SEC31A,GBF1,FNBP1L,VPS8,WASHC4,DNAJC13
M3	secondary alcohol metabolic process	GO:1902652	0.0537334	8	SULT2B1,CES1,LSS,ABCA1,HMGCR,DHCR7,MVK,CYP27B1
M3	regulation of small GTPase mediated signal transduction	GO:0051056	0.0677367	10	CUL3,MFN2,ROBO1,ABCA1,NOTCH2,CD2AP,SHOC2,SRC,FBP1,PLCE1
M3	cholesterol metabolic process	GO:0008203	0.0610297	7	SULT2B1,CES1,LSS,ABCA1,HMGCR,DHCR7,MVK
M3	endosomal transport	GO:0016197	0.0658949	15	PIKFYVE,MICALL1,TRIM27,EVI5,ENTR1,LYST,ARL4C,SGSM2,ABCA1,VPS4B,GOSR1,GBF1,INPP5F,WASHC4,TBC1D5
M3	response to lipoprotein particle	GO:0055094	0.0963018	3	ABCA1,PPARG,LDLR
M3	sterol metabolic process	GO:0016125	0.0610297	7	SULT2B1,CES1,LSS,ABCA1,HMGCR,DHCR7,MVK
M3	cellular response to low-density lipoprotein particle stimulus	GO:0071404	0.0582659	3	ABCA1,PPARG,LDLR
M3	cellular response to lipoprotein particle stimulus	GO:0071402	0.0318308	4	PPARG,ABCA1,ADAM17,LDLR
M3	endomembrane system organization	GO:0010256	0.0968378	20	MICALL1,SYNJ1,ARFGEF1,TRAM2,COL5A1,CAMSAP2,REEP2,YWHAZ,WASL,RAB22A,ABCA1,DNAJC13,RAB1A,TMED5,GBF1,FNBP1L,SPAST,WASHC4,LMAN1,SEC16A
M3	endocytosis	GO:0006897	0.081335	23	MICALL1,MAGI2,MRC1,PTPN1,ABCA1,AP2M1,RAB31,ADRB2,FMR1,SYNJ1,LMBR1L,TBC1D5,SRC,RAB22A,SERPINE1,HIP1R,FNBP1L,ITGAV,RAB1A,TF,RAB5A,LDLR,VEGFA
M3	receptor-mediated endocytosis	GO:0006898	0.0175386	17	MICALL1,HIP1R,LMBR1L,MAGI2,MRC1,TF,RAB5A,LDLR,TBC1D5,VEGFA,ABCA1,AP2M1,RAB31,ADRB2,FMR1,FNBP1L,SERPINE1
M3	import into cell	GO:0098657	0.0850323	25	MICALL1,MAGI2,MRC1,PTPN1,ABCA1,AP2M1,RAB31,ADRB2,FMR1,SYNJ1,LMBR1L,TBC1D5,SRC,RAB22A,SERPINE1,HIP1R,SLC39A6,FNBP1L,SLC39A14,ITGAV,RAB1A,TF,RAB5A,LDLR,VEGFA
M3	peptidyl-tyrosine phosphorylation	GO:0018108	0.072632	25	EPHB3,CDKN1B,LIF,PTPN1,IBTK,FLT1,THBS4,SFRP1,PDGFB,CD80,NTRK2,SOCS5,CSPG4,SRC,FER,DYRK1A,PAK2,NF2,ADAM17,INPP5F,PIBF1,YES1,EPHA1,SH3BP5,VEGFA
M3	regulation of cell projection organization	GO:0031344	0.0292395	24	TNIK,KIF13B,RHOQ,CCP110,NAV3,FMR1,PSEN1,NCKAP1,CBFA2T2,SRC,NEDD4L,FER,MACF1,PALM,RDX,ROBO1,FNBP1L,RAPGEF2,PFN2,CAMSAP2,ZNF365,RAB5A,RAC1,PTK7
M3	regulation of plasma membrane bounded cell projection organization	GO:0120035	0.0250418	24	TNIK,KIF13B,RHOQ,CCP110,NAV3,FMR1,PSEN1,NCKAP1,CBFA2T2,SRC,NEDD4L,FER,ROBO1,PALM,RDX,MACF1,FNBP1L,RAPGEF2,PFN2,CAMSAP2,ZNF365,RAB5A,RAC1,PTK7
M3	peptidyl-tyrosine modification	GO:0018212	0.0766512	25	EPHB3,CDKN1B,LIF,PTPN1,IBTK,FLT1,THBS4,SFRP1,PDGFB,CD80,NTRK2,SOCS5,CSPG4,SRC,FER,DYRK1A,PAK2,NF2,ADAM17,INPP5F,PIBF1,YES1,EPHA1,SH3BP5,VEGFA
M3	acyl-CoA biosynthetic process	GO:0071616	0.05355	4	PDHA1,DLAT,PDK3,ACLY
M3	sulfur compound biosynthetic process	GO:0044272	0.00263208	11	MTRR,PDHA1,DLAT,PDK3,CSGALNACT1,ACLY,CHSY1,CHST11,DSE,CHST3,GGT5
M3	acetyl-CoA metabolic process	GO:0006084	0.0764991	4	PDHA1,DLAT,PDK3,ACLY
M3	acetyl-CoA biosynthetic process	GO:0006085	0.05355	4	PDHA1,DLAT,PDK3,ACLY
M3	thioester biosynthetic process	GO:0035384	0.05355	4	PDHA1,DLAT,PDK3,ACLY
M3	positive regulation of cellular component movement	GO:0051272	0.0162578	34	ROCK2,FER,MIA3,FLT1,HIF1A,THBS4,SPARC,FN1,PDGFB,ITGA6,CAPN7,WNT5A,SRC,ROR2,S100A14,SERPINE1,CPNE3,GATA2,GATA3,FGF2,RDX,ADAM17,PLCG1,CCL20,HAS2,MMP14,ADAM8,ADAM10,LEF1,CXCL12,VEGFA,RAC1,EPHA1,CEMIP
M3	cellular response to oxygen levels	GO:0071453	0.00103819	17	TMBIM6,FOXO1,ADAM8,ACAA2,TERT,PDK3,PTGS2,TBL2,BNIP3,HIF1A,SFRP1,DDAH1,BNIP3L,BACH1,RBPJ,HYOU1,VEGFA
M3	response to decreased oxygen levels	GO:0036293	0.00018289	23	HSP90B1,DDAH1,HIF1A,SFRP1,BNIP3,BNIP3L,HYOU1,PDK3,BACH1,RBPJ,ACAA2,ADAM17,TMBIM6,ARNT2,ADAM8,TERT,PLOD2,PLOD1,PTGS2,TBL2,EP300,ITPR2,VEGFA
M3	cellular response to decreased oxygen levels	GO:0036294	0.000683088	16	TMBIM6,ADAM8,ACAA2,TERT,PDK3,PTGS2,TBL2,BNIP3,HIF1A,SFRP1,DDAH1,BNIP3L,BACH1,RBPJ,HYOU1,VEGFA
M3	response to hypoxia	GO:0001666	0.00018289	23	HSP90B1,DDAH1,HIF1A,SFRP1,BNIP3,BNIP3L,HYOU1,PDK3,BACH1,RBPJ,ACAA2,ADAM17,TMBIM6,ARNT2,ADAM8,TERT,PLOD2,PLOD1,PTGS2,TBL2,EP300,ITPR2,VEGFA
M3	cellular response to hypoxia	GO:0071456	0.000683088	16	TMBIM6,ADAM8,ACAA2,TERT,PDK3,PTGS2,TBL2,BNIP3,HIF1A,SFRP1,DDAH1,BNIP3L,BACH1,RBPJ,HYOU1,VEGFA
M3	positive regulation of leukocyte migration	GO:0002687	0.033755	11	ADAM8,ADAM10,MIA3,WNT5A,CXCL12,THBS4,RAC1,ADAM17,S100A14,CCL20,SERPINE1
M3	regulation of leukocyte migration	GO:0002685	0.0292395	14	MIA3,ADAM8,PTGER4,CCL2,WASL,WNT5A,CXCL12,ADAM17,RAC1,THBS4,S100A14,CCL20,ADAM10,SERPINE1
M3	leukocyte migration	GO:0050900	0.00797525	22	MIA3,FLT1,THBS4,GBF1,PDGFB,WNT5A,S100A14,SERPINE1,GATA3,CCL2,ADAM17,CCL13,GCNT1,CCL20,WASL,ADAM8,PTGER4,ITGB1,CX3CL1,CXCL12,RAC1,ADAM10
M3	myeloid leukocyte migration	GO:0097529	0.081203	12	PDGFB,ADAM8,PTGER4,CCL2,FLT1,CXCL12,THBS4,CCL13,RAC1,GBF1,S100A14,SERPINE1
M3	positive regulation of cell motility	GO:2000147	0.0138553	34	ROCK2,FER,MIA3,FLT1,HIF1A,THBS4,SPARC,FN1,PDGFB,ITGA6,CAPN7,WNT5A,SRC,ROR2,S100A14,SERPINE1,CPNE3,GATA2,GATA3,FGF2,RDX,ADAM17,PLCG1,CCL20,HAS2,MMP14,ADAM8,ADAM10,LEF1,CXCL12,VEGFA,RAC1,EPHA1,CEMIP
M3	response to oxygen levels	GO:0070482	0.000243705	24	FOXO1,HSP90B1,DDAH1,HIF1A,SFRP1,BNIP3,BNIP3L,HYOU1,PDK3,BACH1,RBPJ,ACAA2,ADAM17,TMBIM6,ARNT2,ADAM8,TERT,PLOD2,PLOD1,PTGS2,TBL2,EP300,ITPR2,VEGFA
M3	positive regulation of cell migration	GO:0030335	0.00886027	34	ROCK2,FER,MIA3,FLT1,HIF1A,THBS4,SPARC,FN1,PDGFB,ITGA6,CAPN7,WNT5A,SRC,ROR2,S100A14,SERPINE1,CPNE3,GATA2,GATA3,FGF2,RDX,ADAM17,PLCG1,CCL20,HAS2,MMP14,ADAM8,ADAM10,LEF1,CXCL12,VEGFA,RAC1,EPHA1,CEMIP
M3	PMA-inducible membrane protein ectodomain proteolysis	GO:0051088	0.0546849	2	ADAM17,ADAM10
M3	lymphocyte migration	GO:0072676	0.0406081	8	GATA3,ADAM10,CCL2,WASL,WNT5A,CXCL12,ADAM17,CCL20
M3	cell chemotaxis	GO:0060326	0.0789224	18	PDGFB,ADAM10,FGF2,CX3CL1,CCL2,FLT1,WNT5A,CXCL12,THBS4,CCL13,RAC1,ADAM17,GBF1,S100A14,LEF1,CCL20,VEGFA,SERPINE1
M3	positive regulation of T cell chemotaxis	GO:0010820	0.076593	3	WNT5A,ADAM17,ADAM10
M3	regulation of lymphocyte chemotaxis	GO:1901623	0.0904651	4	WNT5A,CCL2,ADAM17,ADAM10
M3	regulation of chemotaxis	GO:0050920	0.0963018	13	PDGFB,ADAM10,FGF2,ROBO1,WNT5A,CXCL12,ADAM17,VEGFA,CCL2,RAC1,THBS4,S100A14,SERPINE1
M3	positive regulation of chemotaxis	GO:0050921	0.0789224	11	PDGFB,ADAM10,FGF2,WNT5A,CXCL12,THBS4,SERPINE1,RAC1,ADAM17,S100A14,VEGFA
M3	regulation of lymphocyte migration	GO:2000401	0.0406081	7	ADAM10,CCL2,WASL,WNT5A,CXCL12,ADAM17,CCL20
M3	positive regulation of lymphocyte migration	GO:2000403	0.066477	5	ADAM17,WNT5A,CXCL12,CCL20,ADAM10
M3	regulation of T cell migration	GO:2000404	0.0761823	5	ADAM17,WNT5A,CXCL12,CCL20,ADAM10
M3	positive regulation of T cell migration	GO:2000406	0.0427727	5	ADAM17,WNT5A,CXCL12,CCL20,ADAM10
M3	leukocyte chemotaxis	GO:0030595	0.0904651	13	PDGFB,GBF1,ADAM10,CCL2,FLT1,WNT5A,CXCL12,THBS4,CCL13,RAC1,ADAM17,S100A14,SERPINE1
M3	response to tumor necrosis factor	GO:0034612	0.0626506	15	GATA3,CYLD,ADAM10,TNFRSF21,CCL2,YTHDC2,HIPK1,ADAM17,SFRP1,GSDME,NFKBIA,TANK,CHUK,LIMS1,HAS2
M3	positive regulation of leukocyte chemotaxis	GO:0002690	0.0938592	8	ADAM10,WNT5A,CXCL12,THBS4,RAC1,ADAM17,S100A14,SERPINE1
M3	regulation of T cell chemotaxis	GO:0010819	0.0963018	3	WNT5A,ADAM17,ADAM10
M3	regulation of growth	GO:0040008	0.0964967	21	SOX17,CSNK2A3,CDKN1B,SMARCA4,ADAM10,FGF2,INHBA,MMP14,MACF1,RERG,DDX3X,WWC2,LEF1,CRLF3,ADAM17,NOTCH2,SFRP1,CYP27B1,FBP1,EIF4G1,NEDD4L
M3	cellular response to organic cyclic compound	GO:0071407	0.0132678	31	SLC5A5,ROCK2,KDM3A,NRIP1,DICER1,HSP90B1,PPARGC1B,PDE3A,SFRP1,RNF6,UBR5,SPP1,RAPGEF3,CYP27B1,NCOA3,PDE2A,CASP3,SMARCA4,KCNQ1,CCL2,LMO3,APLP1,REST,CTNNB1,RAPGEF2,TERT,LEF1,ATP2B4,EP300,RBFOX2,PRKRA
M3	cyclic nucleotide metabolic process	GO:0009187	0.076879	8	PDE1B,ADCY7,WNT5A,AMPD2,NPR1,PDE2A,PDE3A,VEGFA
M3	nucleobase-containing small molecule metabolic process	GO:0055086	0.0787149	26	RHOQ,AMPD2,NPR1,PDE2A,PDE3A,FBP1,GALT,PDE1B,SULT2B1,WNT5A,GARS,GMDS,PKM,BEND3,XDH,SAMHD1,EXTL2,ENPP4,GMPR2,ME2,CSGALNACT1,ENTPD4,ADCY7,PGM3,AFG1L,VEGFA
M3	cellular response to hormone stimulus	GO:0032870	0.0602983	25	SLC5A5,ROCK2,RHOQ,NCOA3,NRIP1,PPARGC1B,PTPN11,SFRP1,RAB31,TBC1D4,THRA,RNF6,UBR5,SPP1,MARS,KDM3A,SMARCA4,GRB14,LMO3,REST,PPARG,LEF1,PTGFR,EP300,RBFOX2
M3	cellular response to organonitrogen compound	GO:0071417	0.0696834	22	SLC5A5,RHOQ,CACNA2D1,HSP90B1,PDE2A,PDE3A,PTPN11,SFRP1,RAB31,TBC1D4,ADRB2,PSEN1,RAPGEF3,MARS,KCNQ1,CASP3,GRB14,APLP1,CTNNB1,PPARG,RAPGEF2,ATP2B4
M3	response to oxidative stress	GO:0006979	0.070018	4	CHUK,HIF1A,ERCC2,PYCR1
M3	response to hormone	GO:0009725	0.05355	28	SLC5A5,ROCK2,RHOQ,NCOA3,RERG,PPARGC1B,PTPN11,SFRP1,RAB31,TBC1D4,THRA,RNF6,UBR5,SPP1,MARS,KDM3A,SMARCA4,GRB14,NRIP1,LMO3,REST,CTNNB1,PPARG,FHL2,LEF1,PTGFR,EP300,RBFOX2
M3	peptidyl-serine modification	GO:0018209	0.0624263	19	PFN2,PDGFB,PAK2,LIF,RAPGEF3,PDK3,TOP1,ATP2B4,NCK2,ATM,TNKS,ROCK2,GSK3B,STK39,TLK2,DYRK1A,EIF4G1,VEGFA,NEK6
M3	positive regulation of MAPK cascade	GO:0043410	0.0247009	29	TNIK,LIF,MDFIC,ADRA1A,PTPN11,GSDME,ADRB2,PDGFB,FGF2,PIK3CG,WNT5A,MID1,SHC1,DVL3,ALOX15,PAK3,XDH,ROBO1,ERP29,STK39,RAPGEF2,MAP3K7,FLT1,EIF2AK2,RYK,NOTCH2,MAPK8IP2,PLCE1,VEGFA
M3	positive regulation of kinase activity	GO:0033674	0.00675627	34	PIK3R4,TNIK,PTPN1,ZNF16,MDFIC,ADRB2,PDGFB,FGF2,PIK3CG,EMP2,WNT5A,SRC,SHC1,DVL3,PAK2,PAK3,MALT1,ROBO1,TAB2,ERP29,STK39,ADAM17,RAPGEF2,WNK1,PIBF1,PIH1D1,MAP3K7,FLT1,EIF2AK2,ATP2B4,CEMIP,DDX3X,PLCE1,VEGFA
M3	positive regulation of protein serine/threonine kinase activity	GO:0071902	0.000878745	25	TNIK,MDFIC,ADRB2,PDGFB,FGF2,PIK3CG,WNT5A,SRC,SHC1,DVL3,PAK3,ROBO1,ERP29,STK39,ADAM17,RAPGEF2,PIH1D1,MAP3K7,FLT1,EIF2AK2,ATP2B4,VEGFA,DDX3X,PLCE1,CEMIP
M3	regulation of protein serine/threonine kinase activity	GO:0071900	0.00275168	31	TNIK,PTPN1,MDFIC,CDKN1B,ADRB2,TRIB3,PDGFB,FGF2,PIK3CG,WNT5A,DUSP4,SRC,SHC1,DVL3,PAK3,ROBO1,IRAK3,ERP29,STK39,ADAM17,DUSP10,RAPGEF2,PIH1D1,MAP3K7,FLT1,EIF2AK2,ATP2B4,VEGFA,DDX3X,PLCE1,CEMIP
M3	negative regulation of G-protein coupled receptor protein signaling pathway	GO:0045744	0.0833947	6	PALM,GPRASP1,APLP1,ATP2B4,YWHAB,ADRB2
M3	positive regulation of protein kinase activity	GO:0045860	0.00762337	32	TNIK,PTPN1,MALT1,MDFIC,ADRB2,PDGFB,FGF2,PIK3CG,RAPGEF2,WNT5A,SRC,SHC1,DVL3,PAK2,PAK3,ROBO1,TAB2,ERP29,STK39,ADAM17,EMP2,WNK1,PIBF1,PIH1D1,MAP3K7,FLT1,EIF2AK2,ATP2B4,VEGFA,DDX3X,PLCE1,CEMIP
M3	regulation of binding	GO:0051098	0.0839075	23	WAPL,ADRB2,FMR1,PSEN1,PDGFB,RB1,HEY1,BAG2,EIF4G1,GATA3,HIP1R,BAMBI,PLAUR,TNKS,BTAF1,CTNNB1,PPARG,TMBIM6,TERT,LEF1,GSK3B,CRK,USP33
M3	polysaccharide metabolic process	GO:0005976	0.0909729	7	PDGFB,GBE1,B3GNT4,CSGALNACT1,AGL,GSK3B,GYS1
M3	epithelium development	GO:0060429	0.0185186	33	COL4A1,ROCK2,FZD7,DVL3,LIF,COL5A1,NCOA3,ERCC2,TXNIP,SRSF6,VEZF1,INHBA,CES1,RAPGEF3,WNT5A,CYP27B1,XDH,SERPINE1,GATA3,TJP2,FGF2,RDX,ROBO1,CLIC4,ADAM17,TAGLN2,SULT2B1,CTNNB1,RAPGEF2,CPT1A,PIH1D1,ALDOC,VCL
M3	epithelial cell differentiation	GO:0030855	0.0161253	24	ROCK2,FZD7,LIF,NCOA3,ERCC2,TXNIP,SRSF6,VEZF1,CES1,RAPGEF3,WNT5A,CYP27B1,XDH,SERPINE1,GATA3,TJP2,RDX,CLIC4,TAGLN2,SULT2B1,RAPGEF2,CPT1A,PIH1D1,ALDOC
M3	cell-substrate adhesion	GO:0031589	0.00275168	25	EPHB3,FZD7,GPM6B,LIMS1,SLK,FN1,RASA1,PIK3CB,SERPINE1,ITGA10,CRK,ITGA6,LAMC1,MACF1,ITGA1,ITGA2,EMP2,ITGAV,ITGB1,UTRN,GSK3B,ALOX15,RAC1,EPHA1,VEGFA
M3	cellular response to cytokine stimulus	GO:0071345	0.0582659	29	CYLD,FER,EPOR,EPRS,PDE2A,LIMS1,SFRP1,GSDME,TANK,HIF1A,PDE1B,PDGFB,PPARG,WNT5A,HIPK1,NFKBIA,GATA3,ROBO1,OTUD4,CCL2,IRAK3,ADAM17,OSMR,HAS2,LEF1,TNFRSF21,CXCL12,ALOX15,CHUK
M3	regulation of cell-substrate adhesion	GO:0010810	0.0060494	17	RASA1,MACF1,FZD7,ALOX15,EPHA1,GPM6B,UTRN,PIK3CB,LIMS1,SLK,VEGFA,CRK,RAC1,GSK3B,EMP2,SERPINE1,FN1
M3	positive regulation of cell-substrate adhesion	GO:0010811	0.0226539	10	CRK,UTRN,LIMS1,GSK3B,ALOX15,RAC1,EPHA1,EMP2,VEGFA,FN1
M3	positive regulation of cell adhesion	GO:0045785	0.0909036	19	ALOX15,CD55,ITGAV,EPHA1,CXCL12,CX3CL1,ADGRG1,HAS2,IGFBP2,LIMS1,GSK3B,DUSP10,CRK,RAC1,NCK2,UTRN,EMP2,VEGFA,FN1
M3	response to metal ion	GO:0010038	0.0582659	16	SEC31A,CHUK,CDKN1B,TF,CLIC4,MEF2A,HOMER1,LOXL2,WNT5A,HIF1A,ALOX15,BNIP3,FBP1,CPNE3,ITPR3,NEDD4L
M3	regulation of cysteine-type endopeptidase activity	GO:2000116	0.0964967	17	HIP1R,PIH1D1,PAK2,TNFSF10,F3,PPARG,CASP8AP2,ROBO1,REST,PLAUR,XDH,LEF1,DDX3X,SRC,ASPH,APAF1,VEGFA
M3	positive regulation of apoptotic process	GO:0043065	0.0169731	34	TNFRSF12A,SOX4,CYLD,RYBP,CASP8AP2,TCTN3,KLF11,SFRP1,GSDME,BNIP3,BNIP3L,CRADD,TNFSF10,INHBA,ITGA6,PIK3CB,APAF1,HIP1R,CCL2,PAK2,MFN2,XDH,ROBO1,PLAUR,PLCG1,ATM,REST,CTNNB1,PPARG,RAPGEF2,FOXO1,ITGB1,F3,DDX3X
M3	positive regulation of programmed cell death	GO:0043068	0.0190038	34	TNFRSF12A,SOX4,CYLD,RYBP,CASP8AP2,TCTN3,KLF11,SFRP1,GSDME,BNIP3,BNIP3L,CRADD,TNFSF10,INHBA,ITGA6,PIK3CB,APAF1,HIP1R,CCL2,PAK2,MFN2,XDH,ROBO1,PLAUR,PLCG1,ATM,REST,CTNNB1,PPARG,RAPGEF2,FOXO1,ITGB1,F3,DDX3X
M3	regulation of cysteine-type endopeptidase activity involved in apoptotic process	GO:0043281	0.0763321	16	HIP1R,PIH1D1,PAK2,TNFSF10,F3,PPARG,CASP8AP2,ROBO1,REST,PLAUR,LEF1,DDX3X,SRC,XDH,APAF1,VEGFA
M3	negative regulation of intracellular signal transduction	GO:1902532	0.00335503	37	CUL3,MAGI2,PTPN1,WWC2,DLG5,PDE2A,HIF1A,CYLD,TANK,FBP1,HYOU1,RCAN1,FKTN,DUSP4,CD2AP,SRC,RANBP9,NF1,DAG1,FOXO1,MFN2,XDH,APLP1,LMO3,PLAUR,NF2,DUSP10,ATM,INPP5F,PIBF1,TMBIM6,IRAK3,ATP2B4,CXCL12,GSK3B,DDX3X,CHP1
M3	negative regulation of cell proliferation	GO:0008285	0.000878745	38	SOX4,SFRP1,RERG,KLF11,DLG5,FLT1,CDKN1B,SPARC,GSDME,DDAH1,ATF5,NF1,MAGED1,NF2,SULT2B1,INHBA,FKTN,SULF1,WNT5A,ROR2,CYP27B1,GATA2,GATA3,MCC,ADGRG1,XDH,CCL2,ROBO1,RNF41,ITGA1,REST,CTNNB1,PPARG,RAPGEF2,ATM,STRN,EIF2AK2,P3H3
M3	regulation of mitotic cell cycle	GO:0007346	0.0588652	29	CDKN1B,CYLD,TPR,SETMAR,ERCC2,GBF1,CUL3,NEK6,ATRX,PDGFB,RB1,SOX4,VPS4B,EIF4G1,STAG1,BTG3,CCL2,ZNF207,CRADD,TNKS,ADAM17,ATM,SMC5,CDC27,ATF2,STAG2,HECA,DDX3X,RAD17
M3	response to extracellular stimulus	GO:0009991	0.0681185	16	TBL2,TMBIM6,FOXO1,HLCS,POSTN,SPP1,EIF2AK2,MARS,LDLR,HSP90B1,USP33,TBC1D5,SFRP1,FADS1,CYP27B1,EIF4G1
M3	small molecule biosynthetic process	GO:0044283	0.0232865	30	KDM3A,FADS1,PDE2A,PDE3A,ARPP19,FBP1,PDE1B,PDGFB,CES1,PYCR1,ENTPD4,DHCR7,CYP27B1,ABCD3,PKM,FGF2,MTRR,LSS,SAMHD1,HMGCR,REST,HAS2,PIBF1,PLOD1,PLOD2,ATP2B4,PTGS2,DSE,MVK,GGT5
M3	response to nutrient levels	GO:0031667	0.0541026	16	TBL2,TMBIM6,FOXO1,HLCS,POSTN,SPP1,EIF2AK2,MARS,LDLR,HSP90B1,USP33,TBC1D5,SFRP1,FADS1,CYP27B1,EIF4G1
M3	cellular amino acid metabolic process	GO:0006520	0.0434635	16	NOX4,GATB,PYCR1,MTRR,EPRS,GLDC,MARS,QRSL1,ATP2B4,PLOD2,MUT,GOT2,DDAH1,GARS,GGT5,PLOD1
M3	peptidyl-serine phosphorylation	GO:0018105	0.0417534	19	PDGFB,TLK2,PAK2,PFN2,LIF,RAPGEF3,PDK3,TOP1,ATP2B4,NCK2,TNKS,ROCK2,GSK3B,STK39,ATM,DYRK1A,EIF4G1,VEGFA,NEK6
M3	cell cycle phase transition	GO:0044770	0.0226287	27	CDKN1B,CUL3,TPR,ZNF16,KLF11,SOX4,ERCC2,ARPP19,ATF5,SPAST,NEK6,CRADD,RB1,INHBA,CRLF3,VPS4B,STXBP4,BACH1,EIF4G1,CCL2,ZNF207,ADAM17,ATM,TAF2,CDC27,ATP2B4,DDX3X
M3	mitotic cell cycle phase transition	GO:0044772	0.0390726	23	SOX4,CUL3,TPR,KLF11,CDKN1B,ERCC2,ARPP19,SPAST,NEK6,CRADD,RB1,INHBA,CRLF3,VPS4B,BACH1,EIF4G1,CCL2,ZNF207,ADAM17,ATM,TAF2,CDC27,DDX3X
M3	regulation of mitotic nuclear division	GO:0007088	0.054138	14	SMC5,ATRX,PDGFB,CUL3,RB1,TPR,ZNF207,STAG1,STAG2,TNKS,VPS4B,ATM,CDC27,NEK6
M3	regulation of nuclear division	GO:0051783	0.0593104	14	SMC5,ATRX,PDGFB,CUL3,RB1,TPR,ZNF207,STAG1,STAG2,TNKS,VPS4B,ATM,CDC27,NEK6
M3	sister chromatid segregation	GO:0000819	0.0582659	16	PIBF1,SMC5,ATRX,CUL3,RB1,TPR,ZNF207,PDS5A,STAG2,TNKS,VPS4B,WAPL,ATM,CDC27,CTNNB1,NEK6
M3	regulation of cell cycle phase transition	GO:1901987	0.0815553	18	CRADD,SOX4,CUL3,RB1,TPR,ZNF207,CCL2,ZNF16,ATP2B4,ERCC2,VPS4B,DDX3X,STXBP4,ATM,ATF5,EIF4G1,ADAM17,NEK6
M3	regulation of metaphase/anaphase transition of cell cycle	GO:1902099	0.0761823	6	CUL3,RB1,TPR,ZNF207,ATM,NEK6
M3	protein autophosphorylation	GO:0046777	0.0514281	18	GSK3B,EPHB3,TNIK,DYRK1A,PAK2,FER,CDKL5,EIF2AK2,FLT1,PDGFB,SLK,CAMKK2,STK39,ATM,EPHA1,SRC,VEGFA,NEK6
M3	metaphase/anaphase transition of mitotic cell cycle	GO:0007091	0.0406081	7	CDC27,RB1,TPR,ZNF207,ATM,CUL3,NEK6
M3	negative regulation of chromosome organization	GO:2001251	0.0673178	12	ATRX,PIH1D1,UBR5,TPR,TRIP12,STN1,ZNF207,TNKS,SETMAR,WAPL,ATM,SRC
M3	regulation of mitotic metaphase/anaphase transition	GO:0030071	0.0761823	6	CUL3,RB1,TPR,ZNF207,ATM,NEK6
M3	negative regulation of chromosome segregation	GO:0051985	0.0434635	6	ATRX,TPR,ZNF207,TNKS,WAPL,ATM
M3	regulation of chromosome segregation	GO:0051983	0.030415	12	SMC5,ATRX,CUL3,RB1,TPR,ZNF207,TNKS,WAPL,ATM,CDC27,CTNNB1,NEK6
M3	regulation of chromosome separation	GO:1905818	0.0555742	7	CDC27,RB1,TPR,ZNF207,ATM,CUL3,NEK6
M3	negative regulation of organelle organization	GO:0010639	0.0473856	23	TPR,CCP110,TUBB4A,SETMAR,WAPL,BNIP3,ATRX,FEZ2,UBR5,SRC,HIP1R,NAV3,ARFGEF1,ZNF207,ACAA2,TNKS,ATM,PFN2,PIH1D1,TRIP12,SEC22B,TRIM37,STN1
M3	regulation of chromosome organization	GO:0033044	0.0610297	23	TLK2,CUL3,TPR,LIF,TLK1,SETMAR,WAPL,FMR1,NEK6,ATRX,RB1,UBR5,SRC,ZNF207,TNKS,ATM,CTNNB1,SMC5,PIH1D1,CDC27,TRIP12,STN1,VEGFA
M3	regulation of sister chromatid segregation	GO:0033045	0.00299344	12	SMC5,ATRX,CUL3,RB1,TPR,ZNF207,TNKS,WAPL,ATM,CDC27,CTNNB1,NEK6
M3	negative regulation of sister chromatid segregation	GO:0033046	0.0434635	6	ATRX,TPR,ZNF207,TNKS,WAPL,ATM
M3	regulation of mitotic sister chromatid segregation	GO:0033047	0.00670187	10	SMC5,ATRX,CUL3,RB1,TPR,ZNF207,TNKS,ATM,CDC27,NEK6
M3	negative regulation of mitotic sister chromatid segregation	GO:0033048	0.0937143	5	ATM,ATRX,ZNF207,TNKS,TPR
M3	metaphase/anaphase transition of cell cycle	GO:0044784	0.0406081	7	CDC27,RB1,TPR,ZNF207,ATM,CUL3,NEK6
M3	regulation of protein complex assembly	GO:0043254	0.024903	28	PMEPA1,TUBB4A,PTPN11,THRA,RASA1,NCKAP1,ACTR2,SRC,EIF4G1,FER,HIP1R,NAV3,ARFGEF1,PAK3,PIH1D1,ATM,PFN2,CAMSAP1,TRIM27,PTGER4,CAMSAP2,CLIP1,EP300,GSK3B,DDX3X,RAC1,NCK2,VEGFA
M3	mitotic sister chromatid separation	GO:0051306	0.0456581	7	CDC27,RB1,TPR,ZNF207,ATM,CUL3,NEK6
M3	chromosome separation	GO:0051304	0.0909729	7	CDC27,RB1,TPR,ZNF207,ATM,CUL3,NEK6
M3	regulation of mitotic sister chromatid separation	GO:0010965	0.0406081	7	CDC27,RB1,TPR,ZNF207,ATM,CUL3,NEK6
M3	negative regulation of calcium-mediated signaling	GO:0050849	0.0904651	4	RCAN1,GSK3B,ATP2B4,CHP1
M3	divalent inorganic cation transport	GO:0072511	0.0228655	25	CACNA1D,CACNA2D1,IBTK,CACNB2,CACNB3,ATP2C1,PSEN1,PDGFB,MRS2,AHNAK,TRPC6,FGF2,SLC39A6,CCL2,PANX1,CCL8,PLCG1,CTNNB1,SLC39A14,TMBIM6,TRIM27,ITGAV,ATP2B4,ITPR3,CEMIP
M3	negative regulation of calcineurin-NFAT signaling cascade	GO:0070885	0.00335503	4	RCAN1,GSK3B,ATP2B4,CHP1
M3	regulation of calcineurin-NFAT signaling cascade	GO:0070884	0.0983324	4	RCAN1,GSK3B,ATP2B4,CHP1
M3	regulation of calcineurin-mediated signaling	GO:0106056	0.0983324	4	RCAN1,GSK3B,ATP2B4,CHP1
M3	negative regulation of calcineurin-mediated signaling	GO:0106057	0.00335503	4	RCAN1,GSK3B,ATP2B4,CHP1
M3	cell cycle G1/S phase transition	GO:0044843	0.0761823	13	CRADD,CDKN1B,CRLF3,INHBA,CCL2,ATP2B4,KLF11,SOX4,ADAM17,DDX3X,STXBP4,BACH1,EIF4G1
M3	divalent metal ion transport	GO:0070838	0.0228655	25	CACNA1D,CACNA2D1,IBTK,CACNB2,CACNB3,ATP2C1,PSEN1,PDGFB,MRS2,AHNAK,TRPC6,FGF2,SLC39A6,CCL2,PANX1,CCL8,PLCG1,CTNNB1,SLC39A14,TMBIM6,TRIM27,ITGAV,ATP2B4,ITPR3,CEMIP
M3	calcium ion transport	GO:0006816	0.0434635	22	CACNA1D,CACNA2D1,IBTK,CACNB2,CACNB3,ATP2C1,PSEN1,PDGFB,AHNAK,TRPC6,FGF2,CCL2,PANX1,CCL8,PLCG1,CTNNB1,TMBIM6,TRIM27,ITGAV,ATP2B4,ITPR3,CEMIP
M3	histone H3-K9 trimethylation	GO:0036124	0.0582659	3	BEND3,ATRX,PIH1D1
M3	regulation of maintenance of mitotic sister chromatid cohesion	GO:0034182	0.0963018	3	SMC5,ATRX,TNKS
M3	negative regulation of maintenance of mitotic sister chromatid cohesion	GO:0034183	0.0963018	2	TNKS,ATRX
M3	covalent chromatin modification	GO:0016569	0.0963018	29	CUL4B,RYBP,LIF,YEATS2,KDM3A,ZMYND8,RCOR1,SETMAR,FMR1,ATRX,UBR5,UBE2E1,ATXN7,BEND3,NCOA3,HLCS,KMT2A,ELK4,REST,PIH1D1,MAP3K7,TRRAP,TRIP12,ATF2,CLOCK,TRIM37,EP300,LEF1,VEGFA
M3	maintenance of sister chromatid cohesion	GO:0034086	0.064586	4	TNKS,SMC5,ATRX,RB1
M3	maintenance of mitotic sister chromatid cohesion	GO:0034088	0.064586	4	TNKS,SMC5,ATRX,RB1
M3	chromatin remodeling	GO:0006338	0.0508861	9	ATRX,PIH1D1,SMARCA4,SMARCC1,BPTF,TPR,SMARCA1,TOP1,SMARCA5
M3	mitotic sister chromatid cohesion	GO:0007064	0.0761823	5	TNKS,SMC5,ATRX,PDS5A,RB1
M3	regulation of sister chromatid cohesion	GO:0007063	0.0172938	6	SMC5,ATRX,RB1,TNKS,WAPL,CTNNB1
M3	sister chromatid cohesion	GO:0007062	0.0323258	8	SMC5,ATRX,RB1,PDS5A,STAG2,TNKS,WAPL,CTNNB1
M3	negative regulation of maintenance of mitotic sister chromatid cohesion, telomeric	GO:1904908	0.0546849	2	TNKS,ATRX
M3	regulation of maintenance of mitotic sister chromatid cohesion, telomeric	GO:1904907	0.0546849	2	TNKS,ATRX
M3	negative regulation of maintenance of sister chromatid cohesion	GO:0034092	0.0963018	2	ATRX,TNKS
M3	regulation of maintenance of sister chromatid cohesion	GO:0034091	0.0963018	3	SMC5,ATRX,TNKS
M3	histone modification	GO:0016570	0.090769	29	CUL4B,RYBP,LIF,YEATS2,KDM3A,ZMYND8,RCOR1,SETMAR,FMR1,ATRX,UBR5,UBE2E1,ATXN7,BEND3,NCOA3,HLCS,KMT2A,ELK4,REST,PIH1D1,MAP3K7,TRRAP,TRIP12,ATF2,CLOCK,TRIM37,EP300,LEF1,VEGFA
M3	negative regulation of sister chromatid cohesion	GO:0045875	0.0226539	3	ATRX,TNKS,WAPL
M3	mitotic sister chromatid cohesion, telomeric	GO:0099404	0.0546849	2	ATRX,TNKS
M3	maintenance of mitotic sister chromatid cohesion, telomeric	GO:0099403	0.0546849	2	ATRX,TNKS
M3	regulation of transcription from RNA polymerase II promoter in response to hypoxia	GO:0061418	0.0427727	4	HIF1A,BACH1,RBPJ,VEGFA
M3	negative regulation of phosphorylation	GO:0042326	0.0175656	28	CDKN1B,FOXO1,PTPN1,IBTK,SFRP1,NF1,TRIB3,NF2,RB1,FKTN,DUSP4,SOCS5,EIF4G1,RANBP9,DAG1,XDH,LMO3,IRAK3,WWTR1,DUSP10,INPP5F,PIBF1,TRIM27,PMEPA1,FBP1,NCK2,EPHA1,SH3BP5
M3	mesenchymal to epithelial transition	GO:0060231	0.0582659	3	LIF,GATA3,FZD7
M3	regulation of epidermal cell differentiation	GO:0045604	0.0845325	5	NCOA3,ROCK2,SULT2B1,CYP27B1,SRSF6
M3	regulation of epithelial cell proliferation	GO:0050678	0.00040863	26	FZD7,SPARC,FLT1,THBS4,SFRP1,NF1,MAGED1,NRAS,SRSF6,PDGFB,SULF1,WNT5A,STXBP4,GATA2,GATA3,MCC,FGF2,XDH,ROBO1,ADAM17,PLCG1,EGFL7,PPARG,F3,CCL2,VEGFA
M3	positive regulation of epithelial cell proliferation	GO:0050679	0.0175656	15	GATA2,PDGFB,FZD7,FGF2,F3,STXBP4,WNT5A,THBS4,SFRP1,PLCG1,ADAM17,EGFL7,NRAS,VEGFA,SRSF6
M3	epithelial cell proliferation	GO:0050673	0.00069786	27	FZD7,SFRP1,FLT1,THBS4,SPARC,NF1,MAGED1,NRAS,SRSF6,PDGFB,SULF1,LOXL2,WNT5A,STXBP4,GATA2,GATA3,MCC,FGF2,XDH,ROBO1,ADAM17,PLCG1,EGFL7,PPARG,F3,CCL2,VEGFA
M3	activation of protein kinase activity	GO:0032147	0.0673178	18	SHC1,PIBF1,PDGFB,MAP3K7,PAK2,PAK3,EIF2AK2,MALT1,DDX3X,MDFIC,WNT5A,TNIK,STK39,ERP29,PLCE1,EMP2,VEGFA,WNK1
M3	ameboidal-type cell migration	GO:0001667	0.0240092	26	ROCK2,PLCG1,HIF1A,FAT2,SPARC,NF1,PTPRG,PDGFB,CAPN7,LOXL2,WNT5A,SRC,GATA2,GATA3,MCC,FGF2,ROBO1,ADAM17,NUP188,PPARG,EMP2,PFN2,DCN,LGALS8,VEGFA,MEOX2
M3	epidermal cell differentiation	GO:0009913	0.0541026	9	ROCK2,TXNIP,NCOA3,CLIC4,WNT5A,ERCC2,SULT2B1,CYP27B1,SRSF6
M3	embryo development	GO:0009790	0.0964967	17	COL2A1,SOX17,MMP14,FZD7,DAG1,ITGA2,INHBA,COL5A1,COL5A2,ITGAV,COL8A1,ITGB1,WNT5A,COL11A1,FBN2,COL4A2,FN1
M3	pri-miRNA transcription by RNA polymerase II	GO:0061614	0.0138553	8	GATA2,PDGFB,SMARCA4,TERT,KLF5,HIF1A,TEAD1,PPARG
M3	head development	GO:0060322	0.0610792	12	COL4A1,INHBA,ADGRG1,BPTF,ROBO1,SMARCA1,WNT5A,WDR62,GSK3B,PTPN11,PAFAH1B1,ARNT2
M3	cardiovascular system development	GO:0072358	0.000427297	37	COL4A1,ROCK2,COL4A2,TGFBI,FLT1,HIF1A,THBS4,SPARC,NF1,RASA1,PDGFB,HEY1,RAPGEF3,SULF1,LOXL2,WNT5A,HTATIP2,SERPINE1,GATA2,FGF2,ADGRG1,XDH,ROBO1,PLCG1,PPARG,EMP2,TBX20,DCN,ITGAV,ADAM12,ITGB1,ATF2,F3,EPHA1,LGALS8,VEGFA,MEOX2
M3	brain development	GO:0007420	0.0582659	11	COL4A1,INHBA,ADGRG1,BPTF,ROBO1,SMARCA1,WDR62,GSK3B,PTPN11,PAFAH1B1,ARNT2
M3	positive regulation of endothelial cell proliferation	GO:0001938	0.0191789	11	GATA2,PDGFB,FGF2,F3,WNT5A,THBS4,PLCG1,ADAM17,EGFL7,NRAS,VEGFA
M3	negative regulation of protein phosphorylation	GO:0001933	0.0144559	27	CDKN1B,FOXO1,PTPN1,IBTK,SFRP1,NF1,TRIB3,NF2,RB1,FKTN,DUSP4,SOCS5,EIF4G1,RANBP9,DAG1,XDH,LMO3,IRAK3,WWTR1,DUSP10,INPP5F,PIBF1,TRIM27,PMEPA1,NCK2,EPHA1,SH3BP5
M3	endothelial cell proliferation	GO:0001935	0.000521968	19	GATA2,PDGFB,FGF2,F3,XDH,CCL2,FLT1,SULF1,LOXL2,WNT5A,THBS4,SPARC,PLCG1,ADAM17,EGFL7,NF1,PPARG,NRAS,VEGFA
M3	regulation of endothelial cell proliferation	GO:0001936	0.000459351	18	GATA2,PDGFB,FGF2,F3,XDH,CCL2,SULF1,FLT1,WNT5A,THBS4,SPARC,PLCG1,ADAM17,EGFL7,NF1,PPARG,NRAS,VEGFA
M3	cellular response to growth factor stimulus	GO:0071363	0.0517064	30	TRIM33,MARS,BMPR1A,PDE2A,PDE3A,PTPN11,SFRP1,PDGFB,SULF1,WNT5A,NTRK2,SRC,CPNE3,SHC1,CCL2,CASP3,FGF2,XDH,ROBO1,BAMBI,CLEC3B,ADAM17,PLCG1,CTNNB1,HAS2,DCN,FLT1,PMEPA1,LIMS1,VEGFA
M3	cell surface receptor signaling pathway involved in cell-cell signaling	GO:1905114	0.0239865	27	FZD6,FZD7,DVL3,MDFIC,SFRP1,CYLD,UBR5,SULF1,DISC1,WNT5A,ROR1,SOX17,MCC,SMARCA4,BAMBI,WWTR1,TNKS,NDP,CTNNB1,WNK1,STRN,LEF1,TERT,RAB5A,GSK3B,DDX3X,PTK7
M3	blood vessel development	GO:0001568	0.000377658	36	COL4A1,ROCK2,COL4A2,TGFBI,FLT1,HIF1A,THBS4,SPARC,NF1,RASA1,PDGFB,HEY1,RAPGEF3,SULF1,LOXL2,WNT5A,HTATIP2,SERPINE1,GATA2,FGF2,ADGRG1,XDH,ROBO1,PLCG1,PPARG,EMP2,TBX20,DCN,ITGAV,ADAM12,ITGB1,ATF2,F3,EPHA1,VEGFA,MEOX2
M3	vasculature development	GO:0001944	0.000427297	37	COL4A1,ROCK2,COL4A2,TGFBI,FLT1,HIF1A,THBS4,SPARC,NF1,RASA1,PDGFB,HEY1,RAPGEF3,SULF1,LOXL2,WNT5A,HTATIP2,SERPINE1,GATA2,FGF2,ADGRG1,XDH,ROBO1,PLCG1,PPARG,EMP2,TBX20,DCN,ITGAV,ADAM12,ITGB1,ATF2,F3,EPHA1,LGALS8,VEGFA,MEOX2
M3	epidermis development	GO:0008544	0.0199781	12	ROCK2,TXNIP,PLOD1,INHBA,NCOA3,CLIC4,WNT5A,ERCC2,ATP2C1,SULT2B1,CYP27B1,SRSF6
M3	formation of primary germ layer	GO:0001704	0.000156897	13	SOX17,MMP14,FZD7,ITGAV,INHBA,COL5A1,COL5A2,COL8A1,ITGB1,COL11A1,ITGA2,COL4A2,FN1
M3	positive regulation of MAP kinase activity	GO:0043406	0.0112426	17	SHC1,DVL3,PDGFB,MAP3K7,PAK3,EIF2AK2,FGF2,ROBO1,PIK3CG,MDFIC,WNT5A,TNIK,STK39,ERP29,PLCE1,VEGFA,FLT1
M3	regulation of MAP kinase activity	GO:0043405	0.00438713	22	TNIK,PTPN1,MDFIC,TRIB3,PDGFB,FGF2,PIK3CG,WNT5A,DUSP4,SHC1,DVL3,PAK3,ROBO1,IRAK3,ERP29,STK39,DUSP10,MAP3K7,FLT1,EIF2AK2,PLCE1,VEGFA
M3	negative regulation of vasculature development	GO:1901343	0.0390713	12	DCN,PDGFB,COL4A2,ATF2,SULF1,ROCK2,THBS4,SPARC,PPARG,XDH,SERPINE1,MEOX2
M3	tube morphogenesis	GO:0035239	0.00161897	36	COL4A1,ROCK2,COL4A2,TGFBI,FLT1,HIF1A,THBS4,SPARC,NF1,RASA1,HEY1,RAPGEF3,SULF1,LOXL2,WNT5A,HTATIP2,SERPINE1,GATA2,FGF2,ADGRG1,XDH,ROBO1,PLCG1,CTNNB1,PPARG,EMP2,TBX20,DCN,ITGAV,ADAM12,F3,ATF2,ITGB1,EPHA1,VEGFA,MEOX2
M3	embryonic morphogenesis	GO:0048598	0.0182876	16	COL2A1,SOX17,MMP14,FZD7,DAG1,ITGA2,INHBA,COL5A1,COL5A2,ITGAV,COL8A1,ITGB1,COL11A1,FBN2,COL4A2,FN1
M3	response to growth factor	GO:0070848	0.0359825	32	TPR,TRIM33,SULF1,BMPR1A,PDE2A,PDE3A,PTPN11,SFRP1,PDGFB,MARS,WNT5A,NTRK2,SRC,CPNE3,SHC1,CCL2,CASP3,FNDC4,FGF2,XDH,ROBO1,BAMBI,CLEC3B,ADAM17,PLCG1,CTNNB1,HAS2,DCN,FLT1,PMEPA1,LIMS1,VEGFA
M3	regulation of pri-miRNA transcription by RNA polymerase II	GO:1902893	0.049687	6	PDGFB,SMARCA4,TERT,KLF5,HIF1A,TEAD1
M3	regulation of epithelial cell differentiation	GO:0030856	0.0396855	9	ROCK2,SULT2B1,LIF,NCOA3,VEZF1,CYP27B1,XDH,SERPINE1,SRSF6
M3	positive regulation of epithelial cell differentiation	GO:0030858	0.0618534	6	SULT2B1,LIF,NCOA3,VEZF1,CYP27B1,SERPINE1
M3	gastrulation	GO:0007369	0.000798318	14	SOX17,MMP14,FZD7,DAG1,INHBA,COL5A1,COL5A2,COL8A1,ITGB1,COL11A1,ITGA2,COL4A2,FN1,ITGAV
M3	epithelium migration	GO:0090132	0.00872724	26	ROCK2,PLCG1,HIF1A,FAT2,SPARC,NF1,PTPRG,PDGFB,CAPN7,LOXL2,WNT5A,SRC,GATA2,GATA3,MCC,FGF2,ROBO1,ADAM17,NUP188,PPARG,EMP2,PFN2,DCN,LGALS8,VEGFA,MEOX2
M3	tissue migration	GO:0090130	0.00872724	26	ROCK2,PLCG1,HIF1A,FAT2,SPARC,NF1,PTPRG,PDGFB,CAPN7,LOXL2,WNT5A,SRC,GATA2,GATA3,MCC,FGF2,ROBO1,ADAM17,NUP188,PPARG,EMP2,PFN2,DCN,LGALS8,VEGFA,MEOX2
M3	activation of MAPK activity	GO:0000187	0.0434635	10	SHC1,TNIK,MAP3K7,PAK3,EIF2AK2,MDFIC,WNT5A,STK39,ERP29,PLCE1
M3	regulation of vasculature development	GO:1901342	0.00104937	27	ROCK2,COL4A2,FLT1,HIF1A,THBS4,SPARC,NF1,PDGFB,RAPGEF3,SULF1,WNT5A,HTATIP2,SERPINE1,GATA2,FGF2,XDH,PLCG1,PPARG,EMP2,DCN,ADAM12,F3,ATF2,ITGB1,EPHA1,VEGFA,MEOX2
M3	blood vessel morphogenesis	GO:0048514	0.000350247	35	COL4A1,ROCK2,COL4A2,TGFBI,FLT1,HIF1A,THBS4,SPARC,NF1,RASA1,HEY1,RAPGEF3,SULF1,LOXL2,WNT5A,HTATIP2,SERPINE1,GATA2,FGF2,ADGRG1,XDH,ROBO1,PLCG1,PPARG,EMP2,TBX20,DCN,ITGAV,ADAM12,F3,ATF2,ITGB1,EPHA1,VEGFA,MEOX2
M3	endothelial cell migration	GO:0043542	0.0268383	19	GATA2,GATA3,DCN,PDGFB,FGF2,ROCK2,LGALS8,ROBO1,LOXL2,WNT5A,HIF1A,ADAM17,SPARC,PLCG1,NF1,PPARG,EMP2,VEGFA,MEOX2
M3	positive regulation of epithelial cell migration	GO:0010634	0.0964967	13	GATA2,GATA3,PDGFB,FGF2,ROCK2,CAPN7,WNT5A,HIF1A,ADAM17,SPARC,PLCG1,SRC,VEGFA
M3	epithelial cell migration	GO:0010631	0.00872724	26	ROCK2,PLCG1,HIF1A,FAT2,SPARC,NF1,PTPRG,PDGFB,CAPN7,LOXL2,WNT5A,SRC,GATA2,GATA3,MCC,FGF2,ROBO1,ADAM17,NUP188,PPARG,EMP2,PFN2,DCN,LGALS8,VEGFA,MEOX2
M3	regulation of epithelial cell migration	GO:0010632	0.029305	21	GATA2,PTPRG,MCC,ROCK2,GATA3,PFN2,PDGFB,DCN,CAPN7,WNT5A,HIF1A,ADAM17,VEGFA,SPARC,PLCG1,SRC,NF1,PPARG,EMP2,FGF2,MEOX2
M3	tube development	GO:0035295	0.00129165	39	COL4A1,ROCK2,COL4A2,TGFBI,LIF,FLT1,HIF1A,THBS4,SPARC,NF1,SRSF6,RASA1,HEY1,RAPGEF3,SULF1,LOXL2,WNT5A,HTATIP2,SERPINE1,GATA2,FGF2,ADGRG1,XDH,ROBO1,PLCG1,CTNNB1,PPARG,EMP2,TBX20,DCN,ITGAV,ADAM12,F3,ATF2,ITGB1,ITGA6,EPHA1,VEGFA,MEOX2
M3	positive regulation of endothelial cell migration	GO:0010595	0.0761823	11	GATA2,GATA3,ROCK2,HIF1A,FGF2,WNT5A,PDGFB,ADAM17,SPARC,PLCG1,VEGFA
M3	regulation of endothelial cell migration	GO:0010594	0.0472612	16	GATA2,GATA3,DCN,PDGFB,FGF2,ROCK2,WNT5A,HIF1A,ADAM17,SPARC,PLCG1,NF1,PPARG,EMP2,VEGFA,MEOX2
M3	angiogenesis	GO:0001525	0.00099429	32	COL4A1,ROCK2,COL4A2,TGFBI,FLT1,HIF1A,THBS4,SPARC,NF1,HEY1,RAPGEF3,SULF1,LOXL2,WNT5A,HTATIP2,SERPINE1,GATA2,FGF2,ADGRG1,ROBO1,PLCG1,PPARG,EMP2,DCN,ITGAV,ADAM12,ITGB1,ATF2,F3,EPHA1,VEGFA,MEOX2
M3	negative regulation of cellular component movement	GO:0051271	0.000307237	28	ROBO1,DLG5,MIA3,BMPR1A,NAV3,SFRP1,NF1,PTPRG,SULF1,ZMYND8,SERPINE1,GATA3,MCC,DAG1,FGF2,CCL2,CLIC4,RNF41,PPARG,PFN2,DCN,PTGER4,CX3CL1,CXCL12,CRK,EPHA1,WASL,MEOX2
M3	regulation of vascular smooth muscle cell proliferation	GO:1904705	0.0761823	6	PDGFB,MFN2,FGF2,BMPR1A,CDKN1B,PPARG
M3	vascular smooth muscle cell proliferation	GO:1990874	0.0761823	6	PDGFB,MFN2,FGF2,BMPR1A,CDKN1B,PPARG
M3	negative regulation of locomotion	GO:0040013	0.000736452	28	ROBO1,DLG5,MIA3,BMPR1A,NAV3,SFRP1,NF1,PTPRG,SULF1,ZMYND8,SERPINE1,GATA3,MCC,DAG1,FGF2,CCL2,CLIC4,RNF41,PPARG,PFN2,DCN,PTGER4,CX3CL1,CXCL12,CRK,EPHA1,WASL,MEOX2
M3	negative regulation of cell motility	GO:2000146	0.000222949	28	ROBO1,DLG5,MIA3,BMPR1A,NAV3,SFRP1,NF1,PTPRG,SULF1,ZMYND8,SERPINE1,GATA3,MCC,DAG1,FGF2,CCL2,CLIC4,RNF41,PPARG,PFN2,DCN,PTGER4,CX3CL1,CXCL12,CRK,EPHA1,WASL,MEOX2
M3	positive regulation of vascular smooth muscle cell proliferation	GO:1904707	0.0983324	4	BMPR1A,PDGFB,FGF2,MFN2
M3	negative regulation of cell migration	GO:0030336	0.000443777	26	ROBO1,DLG5,MIA3,BMPR1A,NAV3,SFRP1,NF1,PTPRG,SULF1,ZMYND8,SERPINE1,MCC,DAG1,FGF2,CCL2,CLIC4,RNF41,PPARG,PFN2,DCN,PTGER4,CX3CL1,CXCL12,EPHA1,WASL,MEOX2
M3	positive regulation of mitochondrial membrane permeability	GO:0035794	0.0845325	5	RHOT1,ACAA2,HIP1R,BNIP3,ATF2
M3	positive regulation of membrane permeability	GO:1905710	0.0937143	5	RHOT1,ACAA2,HIP1R,BNIP3,ATF2
M3	regulation of mitochondrial membrane permeability involved in apoptotic process	GO:1902108	0.0845325	5	RHOT1,ACAA2,HIP1R,BNIP3,ATF2
M3	intrinsic apoptotic signaling pathway in response to hypoxia	GO:1990144	0.0226539	3	BNIP3,TMBIM6,HYOU1
M3	mitochondrial outer membrane permeabilization involved in programmed cell death	GO:1902686	0.0761823	5	RHOT1,ACAA2,HIP1R,BNIP3,ATF2
M3	regulation of apoptotic signaling pathway	GO:2001233	0.044267	24	TNFRSF12A,CYLD,HIF1A,SFRP1,GSDME,BNIP3,FEM1B,HYOU1,TNFSF10,INHBA,SRC,SERPINE1,HIP1R,DDX3X,PAK2,ITGA6,PLAUR,TMBIM6,PIH1D1,ITGAV,ACAA2,TERT,CXCL12,MAPK8IP2
M3	positive regulation of mitochondrial membrane permeability involved in apoptotic process	GO:1902110	0.0582659	5	RHOT1,ACAA2,HIP1R,BNIP3,ATF2
M3	mitochondrial protein catabolic process	GO:0035694	0.00335503	4	BNIP3,BNIP3L,YME1L1,AFG1L
M3	positive regulation of vasculature development	GO:1904018	0.0495505	14	GATA2,EPHA1,PDGFB,ADAM12,FGF2,ITGB1,RAPGEF3,FLT1,WNT5A,HIF1A,VEGFA,PLCG1,F3,SERPINE1
M3	cellular response to tumor necrosis factor	GO:0071356	0.0904651	13	GATA3,CYLD,TNFRSF21,CCL2,HIPK1,ADAM17,SFRP1,GSDME,NFKBIA,TANK,CHUK,LIMS1,HAS2
M3	regulation of angiogenesis	GO:0045765	0.00253712	25	ROCK2,COL4A2,FLT1,HIF1A,THBS4,SPARC,NF1,RAPGEF3,SULF1,WNT5A,HTATIP2,SERPINE1,GATA2,FGF2,PLCG1,PPARG,EMP2,DCN,ADAM12,F3,ATF2,ITGB1,EPHA1,VEGFA,MEOX2
M3	positive regulation of angiogenesis	GO:0045766	0.066477	13	GATA2,EPHA1,ADAM12,FGF2,ITGB1,RAPGEF3,FLT1,WNT5A,HIF1A,VEGFA,PLCG1,F3,SERPINE1
M3	regulation of extrinsic apoptotic signaling pathway	GO:2001236	0.0711976	12	TNFRSF12A,CYLD,ITGAV,PAK2,ITGA6,INHBA,TNFSF10,TERT,SFRP1,FEM1B,SRC,SERPINE1
M3	extrinsic apoptotic signaling pathway	GO:0097191	0.029305	17	TNFRSF12A,FEM1B,ITGAV,PAK2,TNFSF10,INHBA,CASP8AP2,ITGA6,DDX3X,RNF41,HIPK1,SFRP1,CYLD,SRC,TLR3,SERPINE1,TERT
M3	negative regulation of epithelial cell proliferation	GO:0050680	0.00928097	12	GATA3,MCC,SFRP1,MAGED1,XDH,ROBO1,SULF1,FLT1,CCL2,SPARC,NF1,PPARG
M3	microtubule cytoskeleton organization	GO:0000226	0.0323258	32	ROCK2,CYLD,TPR,CEP68,CCP110,TUBB4A,SLK,TRIM37,ATF5,SPAST,STAG1,ATXN7,DISC1,PPP1R12A,VPS4B,PAFAH1B1,MARK4,FER,NAV3,DAG1,ZNF207,CTNNB1,PIBF1,CAMSAP1,CAMSAP2,KIF24,CLIP1,STAG2,WDR62,GSK3B,RAC1,USP33
M3	negative regulation of mammary gland epithelial cell proliferation	GO:0033600	0.0963018	2	GATA3,ROBO1
M3	positive regulation of pri-miRNA transcription by RNA polymerase II	GO:1902895	0.0138553	6	PDGFB,SMARCA4,TERT,KLF5,HIF1A,TEAD1
M3	regulation of metal ion transport	GO:0010959	0.0690403	19	TMBIM6,TRIM27,PDGFB,CACNA1D,TF,CCL2,CACNA2D1,KIF5B,CACNB2,KCNQ1,AHNAK,STK39,WWP2,PLCG1,TRPC6,CTNNB1,CHP1,CEMIP,NEDD4L
M3	transmembrane receptor protein tyrosine kinase signaling pathway	GO:0007169	0.0175656	28	EPHB3,RHOQ,PTPN1,FLT1,PTPN11,PDGFB,SULF1,NTRK2,SOCS5,KIF16B,CPNE3,FER,HIP1R,CASP3,FGF2,GRB14,XDH,ROBO1,PLAUR,ADAM17,PLCG1,DCN,F3,CRK,RAC1,EPHA1,MVB12B,VEGFA
M3	ERBB signaling pathway	GO:0038127	0.064277	10	FER,HIP1R,SOCS5,PLAUR,ADAM17,PTPN11,PLCG1,MVB12B,KIF16B,CPNE3
M3	regulation of cytoskeleton organization	GO:0051493	0.0219849	31	CYLD,TPR,GPM6B,TUBB4A,LIMK1,ATF5,STAG2,RASA1,STAG1,NCKAP1,RAPGEF3,VPS4B,FER,HIP1R,NAV3,ARFGEF1,PAK3,RDX,NF2,CTNNB1,PFN2,CAMSAP1,TRIM27,CAMSAP2,CLIP1,TRIM37,ACTR2,GSK3B,CRK,RAC1,NCK2
M3	regulation of microtubule cytoskeleton organization	GO:0070507	0.0626506	15	STAG1,NAV3,CYLD,TPR,CLIP1,CAMSAP2,CAMSAP1,TUBB4A,TRIM37,RAC1,GSK3B,VPS4B,STAG2,ATF5,CTNNB1
M3	regulation of microtubule-based process	GO:0032886	0.0812705	16	STAG1,NAV3,CYLD,TPR,CLIP1,MACF1,CAMSAP1,TUBB4A,TRIM37,RAC1,GSK3B,VPS4B,STAG2,CAMSAP2,ATF5,CTNNB1
M3	viral gene expression	GO:0019080	0.0793983	9	TRIM27,SMARCA4,MDFIC,LEF1,CCNT2,EP300,EIF3A,REST,SSB
M3	viral process	GO:0016032	0.0666055	25	ROCK2,CCNT2,EIF3A,MDFIC,FMR1,DAG1,PTX3,VPS4B,CD55,SMARCA4,IFIT5,YTHDC2,SSB,REST,RAB1A,TRIM27,ITGAV,LEF1,EIF2AK2,RAB5A,MVB12B,EP300,DDX3X,PABPC1,ISG20
M3	positive regulation of cell-matrix adhesion	GO:0001954	0.0309635	7	UTRN,LIMS1,GSK3B,RAC1,EPHA1,EMP2,VEGFA
M3	regulation of cell-matrix adhesion	GO:0001952	0.00424538	13	RASA1,PIK3CB,GPM6B,UTRN,MACF1,SLK,LIMS1,GSK3B,SERPINE1,RAC1,EPHA1,EMP2,VEGFA
M3	cell-matrix adhesion	GO:0007160	0.00544167	18	GSK3B,RASA1,ITGA10,ITGAV,EPHA1,GPM6B,UTRN,PIK3CB,MACF1,ITGB1,LIMS1,SLK,VEGFA,RAC1,ITGA1,ITGA2,EMP2,SERPINE1
M3	Wnt signaling pathway	GO:0016055	0.00856978	27	FZD6,FZD7,SOX17,MDFIC,SFRP1,CYLD,UBR5,SULF1,DISC1,WNT5A,ROR1,DVL3,MCC,SMARCA4,BAMBI,WWTR1,TNKS,NDP,CTNNB1,WNK1,STRN,LEF1,TERT,RAB5A,GSK3B,DDX3X,PTK7
M3	skin development	GO:0043588	0.0582659	11	ROCK2,TXNIP,ITGA6,INHBA,COL5A1,COL5A2,CLIC4,WNT5A,CYP27B1,NCOA3,SRSF6
M3	canonical Wnt signaling pathway	GO:0060070	0.0435742	20	SOX17,FZD6,FZD7,WNK1,UBR5,DVL3,LEF1,RAB5A,BAMBI,DDX3X,TNKS,WWTR1,WNT5A,MCC,GSK3B,NDP,SFRP1,CYLD,PTK7,CTNNB1
M3	cell-cell signaling by wnt	GO:0198738	0.00949121	27	FZD6,FZD7,SOX17,MDFIC,SFRP1,CYLD,UBR5,SULF1,DISC1,WNT5A,ROR1,DVL3,MCC,SMARCA4,BAMBI,WWTR1,TNKS,NDP,CTNNB1,WNK1,STRN,LEF1,TERT,RAB5A,GSK3B,DDX3X,PTK7
M3	response to nutrient	GO:0007584	0.0845325	7	TMBIM6,HLCS,POSTN,SPP1,HSP90B1,SFRP1,CYP27B1
M3	alcohol biosynthetic process	GO:0046165	0.0963018	7	FGF2,CES1,LSS,HMGCR,DHCR7,MVK,CYP27B1
M3	secondary alcohol biosynthetic process	GO:1902653	0.0349694	5	CES1,HMGCR,DHCR7,MVK,LSS
M3	cholesterol biosynthetic process	GO:0006695	0.0349694	5	CES1,HMGCR,DHCR7,MVK,LSS
M3	sterol biosynthetic process	GO:0016126	0.0349694	5	CES1,HMGCR,DHCR7,MVK,LSS
M3	regulation of anatomical structure size	GO:0090066	0.0700522	18	RASA1,HIP1R,NCKAP1,ARFGEF1,FER,PFN2,RDX,PAK3,RAB5A,MACF1,ACTR2,TRIM27,AP2M1,RAC1,NCK2,RAB22A,CLCN3,EDNRA
M3	regulation of cellular component size	GO:0032535	0.0444687	17	RASA1,HIP1R,NCKAP1,ARFGEF1,FER,PFN2,RDX,PAK3,RAB5A,MACF1,ACTR2,TRIM27,AP2M1,RAC1,NCK2,RAB22A,CLCN3
M3	receptor metabolic process	GO:0043112	0.0226539	16	PIK3R4,ITGAV,MAGI2,GPRASP1,PTPN1,RAB5A,TBC1D5,HIF1A,PPARG,AP2M1,RAB31,INPP5F,ITCH,FMR1,VEGFA,KIF16B
M3	supramolecular fiber organization	GO:0097435	0.000798318	37	COL2A1,CUL3,COL5A1,COL5A2,MICAL1,TUBB4A,HSP90B1,SLK,PSEN1,NEBL,NCKAP1,RAPGEF3,LOXL2,MTM1,CD2AP,SRC,KRT20,FER,HIP1R,NAV3,ARFGEF1,RASA1,RDX,NF2,LTBP2,EMP2,PFN2,CAMSAP1,TRIM27,CAMSAP2,KIF24,CLIP1,LIMK1,ACTR2,PAK3,RAC1,NCK2
M3	collagen fibril organization	GO:0030199	0.064586	4	COL2A1,COL5A1,COL5A2,LOXL2
M3	endoderm development	GO:0007492	0.00155499	10	SOX17,MMP14,COL4A2,ITGAV,INHBA,COL5A1,COL5A2,COL8A1,COL11A1,FN1
M3	endoderm formation	GO:0001706	0.00155499	10	SOX17,MMP14,COL4A2,ITGAV,INHBA,COL5A1,COL5A2,COL8A1,COL11A1,FN1
M3	endodermal cell differentiation	GO:0035987	0.00442422	9	MMP14,COL4A2,ITGAV,INHBA,COL5A1,COL5A2,COL8A1,COL11A1,FN1
M3	negative regulation of angiogenesis	GO:0016525	0.0845325	10	DCN,ROCK2,COL4A2,ATF2,SULF1,THBS4,SPARC,PPARG,SERPINE1,MEOX2
M3	negative regulation of blood vessel morphogenesis	GO:2000181	0.0546849	11	DCN,ROCK2,COL4A2,ATF2,SULF1,THBS4,SPARC,PPARG,XDH,SERPINE1,MEOX2
M3	wound healing	GO:0042060	0.0963018	14	TNFRSF12A,PDGFB,FZD7,ARFGEF1,FGF2,F3,COL5A1,MIA3,WNT5A,ADAM17,CRK,ENPP4,SERPINE1,SRSF6
M3	negative regulation of gastrulation	GO:2000542	0.0226539	3	COL5A1,COL5A2,FZD7
M3	negative regulation of endodermal cell differentiation	GO:1903225	0.0546849	2	COL5A1,COL5A2
M3	regulation of endodermal cell differentiation	GO:1903224	0.0963018	2	COL5A1,COL5A2
M3	negative regulation of embryonic development	GO:0045992	0.0226539	3	COL5A1,COL5A2,FZD7
M3	regulation of cell morphogenesis	GO:0022604	0.0435742	20	CAMSAP1,TNIK,SPARC,KIF13B,RDX,MACF1,BAMBI,ROBO1,VEGFA,ZMYM4,ZMYM3,CCL13,CCL2,RAC1,SRC,CRK,LIMS1,RAPGEF2,BRWD1,NEDD4L
M3	actin cytoskeleton organization	GO:0030036	0.029305	30	TNIK,CUL3,GPM6B,RHOQ,PTPN1,MICAL1,HSP90B1,ROCK2,ATP2C1,RASA1,NCKAP1,RAPGEF3,NEBL,CD2AP,SRC,FER,HIP1R,ARFGEF1,PAK3,RDX,NF2,EMP2,PFN2,LIMK1,TRIM27,ACTR2,CRK,RAC1,NCK2,PTK7
M3	regulation of GTPase activity	GO:0043087	0.0582659	20	EPHB3,EVI5,RASA1,ITGB1,ITGA6,RAPGEF3,RDX,ARFGAP3,SGSM2,MUT,LIMS1,GSK3B,RABGAP1,CRK,SNX13,EPHA1,NF1,RAPGEF2,DVL3,ARFGEF1
M3	cellular component morphogenesis	GO:0032989	0.0364004	30	EPHB3,TNIK,CRK,KIF13B,LIMS1,SPARC,NEDD4L,NEBL,MACF1,MTM1,PAFAH1B1,SRC,FN1,ROBO1,DAG1,RDX,CCL2,BAMBI,CCL13,CTNNB1,RAPGEF2,CAMSAP1,ITGAV,ZMYM4,ZMYM3,VEGFA,LAMC1,RAC1,EPHA1,BRWD1
M3	cell morphogenesis	GO:0000902	0.0472612	27	EPHB3,TNIK,SPARC,KIF13B,LIMS1,CCL2,NEDD4L,PAFAH1B1,SRC,FN1,ROBO1,RDX,MACF1,BAMBI,LAMC1,CCL13,CTNNB1,RAPGEF2,CAMSAP1,ITGAV,ZMYM4,ZMYM3,VEGFA,CRK,RAC1,EPHA1,BRWD1
M3	proteoglycan metabolic process	GO:0006029	0.0225949	8	CHSY1,CHST11,SULF1,CSGALNACT1,GLCE,DSE,CTNNB1,CHST3
M3	adherens junction assembly	GO:0034333	0.076879	8	GPM6B,MACF1,LIMS1,SLK,VCL,RAC1,CTNNB1,VEGFA
M3	adherens junction organization	GO:0034332	0.066477	9	GPM6B,RDX,MACF1,LIMS1,SLK,VCL,RAC1,CTNNB1,VEGFA
M3	proteoglycan biosynthetic process	GO:0030166	0.0161076	7	CHSY1,GLCE,CSGALNACT1,CHST11,DSE,CTNNB1,CHST3
M3	regulation of DNA binding	GO:0051101	0.0845325	10	GATA3,RB1,HEY1,LEF1,PLAUR,TNKS,WAPL,CTNNB1,PPARG,PSEN1
M3	positive regulation of extrinsic apoptotic signaling pathway	GO:2001238	0.0688473	6	TNFRSF12A,CYLD,PAK2,TNFSF10,INHBA,SFRP1
M3	regulation of Wnt signaling pathway	GO:0030111	0.0743172	19	SOX17,FZD6,FZD7,SMARCA4,UBR5,DISC1,LEF1,TERT,DDX3X,SULF1,WWTR1,BAMBI,TNKS,MDFIC,WNT5A,MCC,SFRP1,CYLD,WNK1
M3	response to vitamin	GO:0033273	0.0582659	5	SPP1,CYP27B1,HLCS,SFRP1,POSTN
M3	vascular endothelial growth factor signaling pathway	GO:0038084	0.0845325	5	FLT1,DCN,ROBO1,XDH,VEGFA
M3	negative regulation of vascular endothelial growth factor signaling pathway	GO:1900747	0.0963018	2	DCN,XDH
M3	negative regulation of protein complex assembly	GO:0031333	0.0546849	11	PFN2,HIP1R,ARFGEF1,PTGER4,PMEPA1,TUBB4A,EP300,GSK3B,DDX3X,SRC,THRA
M3	protein localization to cytoplasmic stress granule	GO:1903608	0.076593	3	TIA1,SSB,DDX3X
M3	regulation of translational initiation	GO:0006446	0.0909729	7	PAIP2B,TPR,EIF2AK2,DDX3X,YTHDF3,NCK2,EIF4G1
M3	acetyl-CoA biosynthetic process from pyruvate	GO:0006086	0.076593	3	PDHA1,DLAT,PDK3
M3	non-canonical Wnt signaling pathway	GO:0035567	0.0427727	5	DVL3,WNT5A,FZD6,FZD7,SFRP1
M3	regulation of vasculogenesis	GO:2001212	0.0963018	2	XDH,EMP2
M3	blood vessel endothelial cell migration	GO:0043534	0.0547355	12	GATA2,PDGFB,FGF2,ROBO1,HIF1A,ADAM17,PLCG1,NF1,PPARG,EMP2,VEGFA,MEOX2
M3	actin filament organization	GO:0007015	0.0201525	22	CUL3,MICAL1,LIMK1,RASA1,NCKAP1,RAPGEF3,CD2AP,SRC,FER,HIP1R,ARFGEF1,HSP90B1,NEBL,RDX,NF2,EMP2,PFN2,TRIM27,ACTR2,PAK3,RAC1,NCK2
M3	negative regulation of hypoxia-induced intrinsic apoptotic signaling pathway	GO:1903298	0.0963018	2	TMBIM6,HYOU1
M3	regulation of hypoxia-induced intrinsic apoptotic signaling pathway	GO:1903297	0.0963018	2	TMBIM6,HYOU1
M3	negative regulation of cellular response to hypoxia	GO:1900038	0.0406081	3	DDAH1,TMBIM6,HYOU1
M3	UDP-N-acetylgalactosamine metabolic process	GO:0019276	0.0963018	2	CSGALNACT1,EXTL2
M3	nucleotide-sugar metabolic process	GO:0009225	0.00762337	5	GALT,GMDS,PGM3,CSGALNACT1,EXTL2
M3	platelet-derived growth factor receptor signaling pathway	GO:0048008	0.0761823	5	F3,PTPN1,PDGFB,HIP1R,VEGFA
M3	actin filament polymerization	GO:0030041	0.0797988	10	FER,HIP1R,NCKAP1,ARFGEF1,PFN2,PAK3,ACTR2,TRIM27,NCK2,RASA1
M3	cellular response to macrophage colony-stimulating factor stimulus	GO:0036006	0.0406081	3	FER,PDE2A,PDE1B
M3	response to macrophage colony-stimulating factor	GO:0036005	0.0406081	3	FER,PDE2A,PDE1B
M3	regulation of actin filament organization	GO:0110053	0.0711976	15	FER,HIP1R,NCKAP1,ARFGEF1,RASA1,PFN2,RDX,RAPGEF3,LIMK1,ACTR2,NF2,PAK3,RAC1,NCK2,TRIM27
M3	regulation of plasma membrane bounded cell projection assembly	GO:0120032	0.0913027	11	FER,NCKAP1,PFN2,PALM,RHOQ,RDX,RAB5A,RAC1,FNBP1L,FMR1,CCP110
M3	positive regulation of supramolecular fiber organization	GO:1902905	0.0931601	13	PFN2,NCKAP1,FER,CLIP1,RAPGEF3,LIMK1,ACTR2,NF2,NAV3,RAC1,NCK2,TRIM27,PSEN1
M3	regulation of supramolecular fiber organization	GO:1902903	0.0268383	21	PAK3,RASA1,HIP1R,NCKAP1,ARFGEF1,FER,PFN2,RDX,RAPGEF3,RAC1,CAMSAP1,TUBB4A,CAMSAP2,LIMK1,ACTR2,NF2,NAV3,CLIP1,NCK2,TRIM27,PSEN1
M3	regulation of cell projection assembly	GO:0060491	0.0959488	11	FER,NCKAP1,PFN2,PALM,RHOQ,RDX,RAB5A,RAC1,FNBP1L,FMR1,CCP110
M3	regulation of actin filament length	GO:0030832	0.0987589	10	PFN2,HIP1R,NCKAP1,ARFGEF1,FER,PAK3,ACTR2,TRIM27,NCK2,RASA1
M3	regulation of actin filament polymerization	GO:0030833	0.064277	10	PFN2,HIP1R,NCKAP1,ARFGEF1,PAK3,FER,ACTR2,TRIM27,NCK2,RASA1
M3	regulation of actin polymerization or depolymerization	GO:0008064	0.0987589	10	PFN2,HIP1R,NCKAP1,ARFGEF1,FER,PAK3,ACTR2,TRIM27,NCK2,RASA1
M3	regulation of protein polymerization	GO:0032271	0.0127647	16	FER,HIP1R,NCKAP1,ARFGEF1,PAK3,PFN2,CAMSAP2,CAMSAP1,TUBB4A,RAC1,ACTR2,NAV3,CLIP1,NCK2,TRIM27,RASA1
M3	protein polymerization	GO:0051258	0.0632181	16	RASA1,HIP1R,NCKAP1,ARFGEF1,FER,PFN2,PAK3,CAMSAP1,TUBB4A,CAMSAP2,ACTR2,NAV3,RAC1,CLIP1,NCK2,TRIM27
M3	glycosaminoglycan metabolic process	GO:0030203	0.00376739	10	PDGFB,FGF2,CHSY1,CSGALNACT1,HAS2,CHST11,DSE,CEMIP2,CHST3,CEMIP
M3	aminoglycan metabolic process	GO:0006022	0.00315851	11	PDGFB,FGF2,CHSY1,B3GNT4,CSGALNACT1,HAS2,CHST11,DSE,CEMIP2,CHST3,CEMIP
M3	regulation of blood vessel endothelial cell migration	GO:0043535	0.0845325	10	GATA2,PDGFB,FGF2,HIF1A,ADAM17,PLCG1,NF1,PPARG,VEGFA,MEOX2
M3	positive regulation of phosphatidylinositol 3-kinase activity	GO:0043552	0.0904651	4	PIK3R4,PDGFB,FGF2,FLT1
M3	hyaluronan metabolic process	GO:0030212	0.0427727	5	CEMIP2,PDGFB,HAS2,CEMIP,FGF2
M3	hyaluronan catabolic process	GO:0030214	0.0963018	3	CEMIP2,CEMIP,FGF2
M3	carbohydrate derivative catabolic process	GO:1901136	0.0963018	10	PDE3A,PDE1B,FGF2,ENTPD4,PDE2A,SAMHD1,CEMIP2,ENPP4,NAGA,CEMIP
M3	vascular endothelial cell proliferation	GO:0101023	0.00762337	6	FGF2,CCL2,FLT1,ADAM17,PLCG1,PPARG
M3	mucopolysaccharide metabolic process	GO:1903510	0.000422078	10	PDGFB,FGF2,CHSY1,CSGALNACT1,HAS2,CHST11,DSE,CEMIP2,CHST3,CEMIP
M3	regulation of vascular endothelial cell proliferation	GO:1905562	0.00762337	6	FGF2,CCL2,FLT1,ADAM17,PLCG1,PPARG
M3	localization within membrane	GO:0051668	0.0406081	7	RAB1A,AGRN,SEC24D,MIA3,SEC23A,RAC1,SEC31A
M3	negative regulation of endothelial cell proliferation	GO:0001937	0.0309635	7	XDH,CCL2,SULF1,FLT1,SPARC,NF1,PPARG
M3	negative regulation of vascular endothelial cell proliferation	GO:1905563	0.0226539	3	FLT1,CCL2,PPARG
M3	regulation of filopodium assembly	GO:0051489	0.066477	5	PALM,RHOQ,FNBP1L,RAB5A,FMR1
M3	regulation of dendrite development	GO:0050773	0.0937143	5	PSEN1,TNIK,FMR1,RAPGEF2,CAMSAP2
M3	integrin activation	GO:0033622	0.064586	4	CX3CL1,CXCL12,PTGER4,FN1
M3	substrate-dependent cell migration	GO:0006929	0.076593	3	ITGA2,ROBO1,FN1
M3	regulation of fat cell differentiation	GO:0045598	0.0618534	6	GATA2,GATA3,LMO3,WNT5A,SFRP1,ZBTB16
M3	fat cell differentiation	GO:0045444	0.0780105	7	GATA2,GATA3,LMO3,WNT5A,SFRP1,ZBTB16,ATF5
M3	regulation of adherens junction organization	GO:1903391	0.0729968	7	GPM6B,RDX,MACF1,LIMS1,SLK,RAC1,VEGFA
M3	pallium development	GO:0021543	0.0983324	4	PAFAH1B1,ROBO1,GSK3B,WDR62
M3	cerebral cortex development	GO:0021987	0.0983324	4	PAFAH1B1,ROBO1,GSK3B,WDR62
M3	aminoglycan biosynthetic process	GO:0006023	0.0161253	8	PDGFB,CHSY1,B3GNT4,CSGALNACT1,HAS2,CHST11,DSE,CHST3
M3	glycosaminoglycan biosynthetic process	GO:0006024	0.0269085	7	PDGFB,CHSY1,CSGALNACT1,HAS2,CHST11,DSE,CHST3
M3	response to interleukin-1	GO:0070555	0.0964967	9	SRC,OTUD4,CCL2,IRAK3,YTHDC2,HIF1A,SFRP1,TANK,HAS2
M3	positive regulation of transcription from RNA polymerase II promoter in response to hypoxia	GO:0061419	0.0226539	3	HIF1A,RBPJ,VEGFA
M3	ectoderm development	GO:0007398	0.0963018	2	FZD7,ITGA6
M3	ectodermal cell differentiation	GO:0010668	0.0963018	2	FZD7,ITGA6
M3	negative regulation of macrophage derived foam cell differentiation	GO:0010745	0.076593	3	NFKBIA,PPARG,ITGAV
M3	negative regulation of lipid storage	GO:0010888	0.05355	4	PNPLA2,NFKBIA,PPARG,ITGAV
M3	regulation of microtubule polymerization	GO:0031113	0.0963018	6	CAMSAP1,NAV3,CAMSAP2,CLIP1,TUBB4A,RAC1
M3	positive regulation of metanephros development	GO:0072216	0.0963018	2	LIF,PDGFB
M3	homocysteine metabolic process	GO:0050667	0.0963018	3	MTRR,MUT,NOX4
M3	histone H2A ubiquitination	GO:0033522	0.0937143	5	TRIP12,CUL4B,RYBP,UBR5,TRIM37
M3	negative regulation of peptidyl-tyrosine phosphorylation	GO:0050732	0.0833947	6	PIBF1,NF2,IBTK,SFRP1,SOCS5,INPP5F
M3	negative regulation of tyrosine phosphorylation of STAT protein	GO:0042532	0.076593	3	PIBF1,NF2,INPP5F
M3	hippo signaling	GO:0035329	0.0937143	5	WWTR1,TEAD1,NF2,WWC2,DLG5
M3	cGMP metabolic process	GO:0046068	0.0937143	5	PDE1B,WNT5A,PDE2A,VEGFA,NPR1
M3	cAMP catabolic process	GO:0006198	0.0963018	3	PDE1B,PDE2A,PDE3A
M3	purine-containing compound catabolic process	GO:0072523	0.0434635	6	PDE1B,XDH,SAMHD1,PDE2A,PDE3A,ENPP4
M3	response to cGMP	GO:0070305	0.0406081	3	PDE2A,PDE3A,RAPGEF2
M3	negative regulation of vascular permeability	GO:0043116	0.076593	3	DDAH1,PDE2A,PDE3A
M3	cellular response to cGMP	GO:0071321	0.0406081	3	PDE2A,PDE3A,RAPGEF2
M3	ribonucleotide catabolic process	GO:0009261	0.0983324	4	PDE1B,PDE2A,PDE3A,ENTPD4
M3	platelet-derived growth factor receptor-beta signaling pathway	GO:0035791	0.076593	3	PTPN1,PDGFB,HIP1R
M3	peroxisome proliferator activated receptor signaling pathway	GO:0035357	0.0963018	3	PPARG,LMO3,PDK3
M3	glutaminyl-tRNAGln biosynthesis via transamidation	GO:0070681	0.0963018	2	GATB,QRSL1
M3	hydroxylysine metabolic process	GO:0046946	0.0963018	2	PLOD2,PLOD1
M3	hydroxylysine biosynthetic process	GO:0046947	0.0963018	2	PLOD2,PLOD1
M3	receptor catabolic process	GO:0032801	0.0761823	5	PIK3R4,PTPN1,GPRASP1,KIF16B,ITCH
M3	ER to Golgi vesicle-mediated transport	GO:0006888	0.0495166	8	CUL3,RAB1A,SEC24D,MIA3,SEC23A,SEC31A,SPAST,HYOU1
M3	COPII-coated vesicle budding	GO:0090114	0.0172938	6	CUL3,RAB1A,SEC24D,MIA3,SEC23A,SEC31A
M3	cargo loading into COPII-coated vesicle	GO:0090110	0.0160672	5	MIA3,SEC31A,SEC23A,RAB1A,SEC24D
M3	Golgi vesicle budding	GO:0048194	0.0133498	7	CUL3,RAB1A,SEC24D,MIA3,SEC23A,SEC31A,GBF1
M3	vesicle budding from membrane	GO:0006900	0.0161253	8	CUL3,RAB1A,SEC24D,MIA3,SEC23A,SEC31A,GBF1,FNBP1L
M3	cargo loading into vesicle	GO:0035459	0.0349694	5	MIA3,SEC31A,SEC23A,RAB1A,SEC24D
M3	regulation of synaptic vesicle transport	GO:1902803	0.0963018	2	RAB5A,PREPL
M3	regulation of synaptic vesicle exocytosis	GO:2000300	0.0963018	2	RAB5A,PREPL
M3	positive regulation of glucose mediated signaling pathway	GO:1902661	0.0963018	2	PIH1D1,SMARCA4
M3	regulation of glucose mediated signaling pathway	GO:1902659	0.0963018	2	PIH1D1,SMARCA4
M3	protein hexamerization	GO:0034214	0.0582659	3	PANX1,YME1L1,SPAST
M3	RNA interference	GO:0016246	0.0963018	3	TERT,DICER1,PRKRA
M3	production of siRNA involved in RNA interference	GO:0030422	0.0226539	3	PRKRA,DICER1,TERT
M3	circadian regulation of gene expression	GO:0032922	0.0963018	3	NRIP1,TOP1,CLOCK
M3	negative regulation of chromatin binding	GO:0035562	0.0963018	2	BTAF1,WAPL
M3	negative regulation of histone H2A K63-linked ubiquitination	GO:1901315	0.0963018	2	TRIP12,UBR5
M3	regulation of histone H2A K63-linked ubiquitination	GO:1901314	0.0963018	2	TRIP12,UBR5
M3	negative regulation of histone ubiquitination	GO:0033183	0.0963018	2	TRIP12,UBR5
M3	chondroitin sulfate biosynthetic process	GO:0030206	0.0141165	4	CHSY1,CHST11,CHST3,CSGALNACT1
M3	chondroitin sulfate metabolic process	GO:0030204	0.0141165	4	CHSY1,CHST11,CHST3,CSGALNACT1
M3	chondroitin sulfate proteoglycan biosynthetic process	GO:0050650	0.05355	4	CHSY1,CHST11,CHST3,CSGALNACT1
M3	chondroitin sulfate proteoglycan metabolic process	GO:0050654	0.05355	4	CHSY1,CHST11,CHST3,CSGALNACT1
M3	zinc ion import across plasma membrane	GO:0071578	0.0546849	2	SLC39A6,SLC39A14
M3	signal transduction by trans-phosphorylation	GO:0023016	0.0963018	2	STK39,WNK1
M1	Ras protein signal transduction	GO:0007265	0.0457097	8	FOXM1,CDKN1A,KIF14,GPSM2,STMN1,CCNA2,BRAP,KPNB1
M1	small GTPase mediated signal transduction	GO:0007264	0.0650048	8	FOXM1,CDKN1A,KIF14,GPSM2,STMN1,CCNA2,BRAP,KPNB1
M1	ribose phosphate biosynthetic process	GO:0046390	0.0672363	6	ADK,PAPSS1,ENO1,PGK1,PARP1,CTPS1
M1	ribonucleotide biosynthetic process	GO:0009260	0.0649952	6	ADK,PAPSS1,ENO1,PGK1,PARP1,CTPS1
M1	purine ribonucleotide metabolic process	GO:0009150	0.0519805	10	ADK,PAPSS1,ENO1,SHMT2,PGK1,PARP1,GNAI3,PDE4B,CDK1,CCNB1
M1	nucleobase-containing small molecule metabolic process	GO:0055086	0.0175656	15	DCK,CCNB1,ADK,CAD,ENO1,SHMT2,TK1,PGK1,PARP1,GNAI3,PDE4B,CDK1,DNPH1,PAPSS1,CTPS1
M1	purine-containing compound metabolic process	GO:0072521	0.0873661	10	ADK,PAPSS1,ENO1,SHMT2,PGK1,PARP1,GNAI3,PDE4B,CDK1,CCNB1
M1	purine nucleotide metabolic process	GO:0006163	0.0582659	10	ADK,PAPSS1,ENO1,SHMT2,PGK1,PARP1,GNAI3,PDE4B,CDK1,CCNB1
M1	nucleotide biosynthetic process	GO:0009165	0.0348468	8	DCK,ADK,PAPSS1,ENO1,TK1,PGK1,PARP1,CTPS1
M1	ribose phosphate metabolic process	GO:0019693	0.0323258	11	ADK,PAPSS1,ENO1,SHMT2,PGK1,PARP1,GNAI3,PDE4B,CDK1,CCNB1,CTPS1
M1	nucleotide metabolic process	GO:0009117	0.0274462	13	DCK,ADK,PAPSS1,ENO1,SHMT2,TK1,PGK1,PARP1,GNAI3,PDE4B,CDK1,CCNB1,CTPS1
M1	nucleoside phosphate biosynthetic process	GO:1901293	0.0362933	8	DCK,ADK,PAPSS1,ENO1,TK1,PGK1,PARP1,CTPS1
M1	nucleoside phosphate metabolic process	GO:0006753	0.0141165	14	DCK,CCNB1,ADK,PAPSS1,ENO1,SHMT2,TK1,PGK1,PARP1,GNAI3,PDE4B,CDK1,DNPH1,CTPS1
M1	ribonucleotide metabolic process	GO:0009259	0.0280048	11	ADK,PAPSS1,ENO1,SHMT2,PGK1,PARP1,GNAI3,PDE4B,CDK1,CCNB1,CTPS1
M1	cellular response to alcohol	GO:0097306	0.0963018	3	RAD51,BRCA1,BLM
M1	purine ribonucleoside monophosphate metabolic process	GO:0009167	0.0541026	7	ADK,ENO1,SHMT2,PARP1,PGK1,CDK1,CCNB1
M1	ribonucleoside monophosphate metabolic process	GO:0009161	0.0557989	7	ADK,ENO1,SHMT2,PARP1,PGK1,CDK1,CCNB1
M1	nucleoside monophosphate metabolic process	GO:0009123	0.0160078	9	DCK,ADK,ENO1,SHMT2,PGK1,PARP1,CDK1,CCNB1,DNPH1
M1	purine nucleoside monophosphate metabolic process	GO:0009126	0.0541026	7	ADK,ENO1,SHMT2,PARP1,PGK1,CDK1,CCNB1
M1	nucleoside monophosphate biosynthetic process	GO:0009124	0.0585536	5	DCK,ADK,PGK1,PARP1,ENO1
M1	purine ribonucleoside triphosphate metabolic process	GO:0009205	0.0527792	7	ENO1,SHMT2,PARP1,PGK1,CDK1,CCNB1,GNAI3
M1	ribonucleoside triphosphate biosynthetic process	GO:0009201	0.0963018	4	CTPS1,PARP1,PGK1,ENO1
M1	regulation of cellular protein localization	GO:1903827	0.0456581	14	NDC80,TCP1,CCT8,BMP4,CDCA5,GPSM2,CCT6A,PARP1,CCT2,ICE1,CDT1,CENPQ,CDK1,MSN
M1	regulation of purine nucleotide metabolic process	GO:1900542	0.05355	5	SHMT2,CCNB1,CDK1,PARP1,ENO1
M1	cellular response to peptide	GO:1901653	0.0815623	7	HDAC9,KAT2B,PARP1,TIMELESS,CD36,PRKDC,STAT5B
M1	regulation of nucleotide metabolic process	GO:0006140	0.0673178	5	SHMT2,CCNB1,CDK1,PARP1,ENO1
M1	mitochondrial DNA repair	GO:0043504	0.0138553	2	DNA2,PARP1
M1	positive regulation of DNA metabolic process	GO:0051054	6.57667e-08	19	RAD51,FOXM1,DNA2,RIF1,TCP1,CCT8,RFC4,CCT6A,TIMELESS,PARP1,NEK2,CCT2,CHTF18,DSCC1,CDT1,PCNA,CDC7,BRCA1,TFRC
M1	regulation of DNA metabolic process	GO:0051052	1.34705e-08	27	RAD51,BLM,FOXM1,MSH6,PARP1,RIF1,DONSON,BRCA1,TCP1,CHTF18,CHEK2,CCT8,CCT6A,CCT2,TIMELESS,DNA2,CDT1,NEK2,RFC4,PARPBP,DSCC1,SMC3,GMNN,TFRC,PCNA,MSH2,CDC7
M1	cellular response to hormone stimulus	GO:0032870	0.0989397	11	BRCA1,MED14,HDAC9,BMP4,PARP1,CACNA1H,KAT2B,URI1,PRKDC,STAT5B,MSN
M1	response to radiation	GO:0009314	0.0124294	13	RAD51,BLM,CDKN1A,CDC25A,ECT2,FANCD2,INTS7,PARP1,CAT,PCNA,DTL,BRCA1,TOPBP1
M1	regulation of small molecule metabolic process	GO:0062012	0.0968846	8	BRCA1,LPGAT1,ENO1,SHMT2,PASK,PARP1,CDK1,CCNB1
M1	ATP metabolic process	GO:0046034	0.076593	6	ENO1,SHMT2,PARP1,PGK1,CDK1,CCNB1
M1	cellular response to organonitrogen compound	GO:0071417	0.0621913	11	RAD51,BLM,HDAC9,KAT2B,PARP1,TIMELESS,IGFBP5,CD36,PRKDC,STAT5B,BRCA1
M1	double-strand break repair	GO:0006302	2.4342e-05	16	RAD51,FOXM1,PARPBP,BRCA2,CHEK2,RPA1,BLM,CDCA5,RBBP8,PARP1,RIF1,TIMELESS,DNA2,GEN1,PRKDC,BRCA1
M1	positive regulation of DNA repair	GO:0045739	0.0115452	6	BRCA1,FOXM1,PARP1,RIF1,TIMELESS,PCNA
M1	cellular response to nitrogen compound	GO:1901699	0.0662589	13	BRCA1,BLM,HDAC9,STAT5B,BMP4,KAT2B,PARP1,TIMELESS,IGFBP5,CD36,PRKDC,AGO2,RAD51
M1	nucleoside triphosphate metabolic process	GO:0009141	0.0406081	8	ENO1,SHMT2,PARP1,GNAI3,PGK1,CDK1,CCNB1,CTPS1
M1	purine nucleoside triphosphate metabolic process	GO:0009144	0.0582659	7	ENO1,SHMT2,PARP1,PGK1,CDK1,CCNB1,GNAI3
M1	cellular response to radiation	GO:0071478	0.0331623	8	RAD51,BLM,CDKN1A,ECT2,CDC25A,INTS7,PARP1,PCNA
M1	response to hormone	GO:0009725	0.0999386	12	BRCA1,MED14,IL1RN,HDAC9,BMP4,PARP1,CACNA1H,KAT2B,URI1,PRKDC,STAT5B,MSN
M1	regulation of response to DNA damage stimulus	GO:2001020	0.0968846	8	RAD51,FOXM1,PARPBP,PARP1,RIF1,TIMELESS,PCNA,BRCA1
M1	positive regulation of response to DNA damage stimulus	GO:2001022	0.0471225	6	BRCA1,FOXM1,PARP1,RIF1,TIMELESS,PCNA
M1	ribonucleoside triphosphate metabolic process	GO:0009199	0.0225949	8	ENO1,SHMT2,PARP1,GNAI3,PGK1,CDK1,CCNB1,CTPS1
M1	regulation of DNA repair	GO:0006282	0.0141334	8	RAD51,FOXM1,PARPBP,PARP1,RIF1,TIMELESS,PCNA,BRCA1
M1	DNA repair	GO:0006281	1.26921e-08	27	RAD51,BLM,FOXM1,MSH6,PARP1,RIF1,BRCA1,UBE2T,BRCA2,RBBP8,POLE,DTL,CHEK2,EXO1,UNG,FANCL,TIMELESS,MSH2,PRKDC,DCLRE1B,ASCC3,PARPBP,DNA2,RPA1,CDCA5,GEN1,PCNA
M1	regulation of ATP metabolic process	GO:1903578	0.0104199	5	SHMT2,CCNB1,CDK1,PARP1,ENO1
M1	positive regulation of protein modification by small protein conjugation or removal	GO:1903322	0.0999386	6	BRCA1,PLK1,UBE2S,FANCI,HSPBP1,CDC20
M1	positive regulation of protein ubiquitination	GO:0031398	0.0672363	6	BRCA1,PLK1,UBE2S,FANCI,HSPBP1,CDC20
M1	regulation of binding	GO:0051098	0.0877414	11	PLK1,AURKA,CDCA5,BMP4,E2F1,GMNN,CD36,STMN1,CDT1,HJURP,CAPRIN2
M1	protein-containing complex localization	GO:0031503	0.0582659	6	NUP107,BIRC5,NUP133,NUP160,SSX2IP,XPOT
M1	regulation of mitotic cell cycle	GO:0007346	1.12874e-11	33	BLM,CDKN1A,NUSAP1,KNTC1,PRKDC,BMP4,NEK2,DONSON,NDC80,CENPE,UBE2C,DTL,MKI67,KIF14,GPSM2,CDK4,E2F1,RCC1,CDT1,CDK1,CDC73,ZWILCH,TACC3,CDC6,PLK1,CHEK2,SMC3,TRIP13,CDCA5,GEN1,KIF11,CCNB1,CDC7
M1	positive regulation of mitotic cell cycle	GO:0045931	0.000310382	11	NUSAP1,CDCA5,GEN1,CDK4,NDC80,CDT1,CDK1,UBE2C,DTL,CCNB1,CDC7
M1	positive regulation of cell cycle	GO:0045787	3.89916e-10	26	CDKN1A,NUSAP1,KIF23,BRCA1,NDC80,UBE2C,DTL,FEN1,RACGAP1,KIF14,FAM83D,GPSM2,CDT1,CDK1,CDC73,CDC6,CCNB1,ECT2,CIT,CDCA5,PLK4,GEN1,KIF20B,SPAG5,CDK4,CDC7
M1	nuclear division	GO:0000280	6.88737e-21	37	MKI67,NUSAP1,KIF22,FLNA,NCAPD3,NEK2,KIF23,NCAPG,NDC80,CENPE,UBE2C,TPX2,CHEK2,RACGAP1,KIF14,BMP4,UBE2S,RCC1,PLK1,KIF2A,TACC3,CDC6,SMC2,DSCC1,ESPL1,NCAPH,TRIP13,CDCA5,CDCA8,GEN1,NCAPD2,SPAG5,KIF11,CDT1,CCNB1,SMC3,KPNB1
M1	cell cycle phase transition	GO:0044770	2.77599e-14	33	BLM,CDKN1A,FOXM1,PRKDC,DONSON,BRCA1,NDC80,CENPE,POLE,CCNB1,UBE2C,DTL,UBE2S,CHEK2,MASTL,KIF14,FAM83D,E2F1,RCC1,TIMELESS,PLK1,CDT1,CDK1,CDC73,TACC3,CDC6,CDC25C,TRIP13,CDCA5,GEN1,CCNA2,CDK4,CDC7
M1	mitotic cell cycle phase transition	GO:0044772	1.41111e-13	30	BLM,CDKN1A,FOXM1,PRKDC,DONSON,NDC80,CENPE,POLE,CCNB1,UBE2C,DTL,CHEK2,MASTL,KIF14,UBE2S,E2F1,RCC1,CDC25C,CDT1,CDK1,CDC73,TACC3,CDC6,PLK1,TRIP13,CDCA5,GEN1,CCNA2,CDK4,CDC7
M1	mitotic DNA damage checkpoint	GO:0044773	0.024903	5	CHEK2,BLM,CDKN1A,DONSON,PRKDC
M1	signal transduction involved in G2 DNA damage checkpoint	GO:0072425	0.0449601	3	BRCA1,DTL,PLK1
M1	negative regulation of mitotic cell cycle phase transition	GO:1901991	7.44602e-05	11	BLM,CDKN1A,NDC80,TRIP13,GEN1,PLK1,CDT1,PRKDC,CDC73,CCNB1,DONSON
M1	regulation of mitotic cell cycle phase transition	GO:1901990	1.95071e-09	21	BLM,CDKN1A,NDC80,CENPE,TRIP13,KIF14,CDC73,CDK1,E2F1,GEN1,CDC7,PLK1,CDT1,PRKDC,CCNB1,UBE2C,DTL,CDK4,DONSON,CDCA5,CDC6
M1	signal transduction involved in DNA damage checkpoint	GO:0072422	0.00118798	6	BRCA1,CHEK2,CDKN1A,PLK1,PRKDC,DTL
M1	negative regulation of mitotic sister chromatid separation	GO:2000816	0.000243705	6	PLK1,TRIP13,GEN1,NDC80,CDT1,CCNB1
M1	regulation of cell cycle G2/M phase transition	GO:1902749	4.48395e-05	10	BRCA1,BLM,PLK1,KIF14,CDK4,CDK1,DTL,CCNB1,DONSON,CDC7
M1	chromosome segregation	GO:0007059	8.42626e-26	42	NUSAP1,KIF22,NCAPD3,NEK2,KIF23,NCAPG,CENPW,BRCA1,NDC80,CENPE,DSCC1,SKA3,HJURP,FEN1,NCAPD2,MKI67,SMC2,RACGAP1,KIF14,FAM83D,SRPK1,RCC1,PLK1,CDT1,TACC3,CDC6,BUB3,BUB1,ESPL1,NCAPH,ECT2,TRIP13,CDCA5,CDCA8,GEN1,TOP2A,SPAG5,KNL1,CCNB1,SMC3,KPNB1,CENPQ
M1	RNA localization	GO:0006403	0.0624263	6	NUP107,TCP1,NUP133,NUP160,CCT2,XPOT
M1	mitotic DNA integrity checkpoint	GO:0044774	0.029305	5	CHEK2,BLM,CDKN1A,DONSON,PRKDC
M1	regulation of mitotic nuclear division	GO:0007088	6.32431e-09	18	MKI67,NUSAP1,SMC3,CENPE,PLK1,CDCA5,TRIP13,BMP4,GEN1,NEK2,RCC1,NDC80,CDT1,KIF11,UBE2C,CCNB1,TACC3,CDC6
M1	negative regulation of mitotic metaphase/anaphase transition	GO:0045841	0.000243705	6	PLK1,TRIP13,GEN1,NDC80,CDT1,CCNB1
M1	mitotic nuclear division	GO:0140014	3.05846e-21	37	MKI67,NUSAP1,KIF22,FLNA,NCAPD3,NEK2,KIF23,NCAPG,NDC80,CENPE,UBE2C,TPX2,CHEK2,RACGAP1,KIF14,BMP4,UBE2S,RCC1,PLK1,KIF2A,TACC3,CDC6,SMC2,DSCC1,ESPL1,NCAPH,TRIP13,CDCA5,CDCA8,GEN1,NCAPD2,SPAG5,KIF11,CDT1,CCNB1,SMC3,KPNB1
M1	negative regulation of metaphase/anaphase transition of cell cycle	GO:1902100	0.000243705	6	PLK1,TRIP13,GEN1,NDC80,CDT1,CCNB1
M1	positive regulation of telomere maintenance via telomere lengthening	GO:1904358	0.0169731	5	CCT2,CCT6A,CCT8,TCP1,NEK2
M1	regulation of telomere maintenance via telomere lengthening	GO:1904356	0.0673178	5	CCT2,CCT6A,TCP1,CCT8,NEK2
M1	response to ionizing radiation	GO:0010212	0.0141334	8	RAD51,BLM,CDKN1A,ECT2,FANCD2,INTS7,BRCA1,TOPBP1
M1	nuclear chromosome segregation	GO:0098813	4.95188e-21	34	NUSAP1,KIF22,NCAPD3,NEK2,KIF23,NCAPG,NDC80,CENPE,BUB1,FEN1,NCAPD2,SMC2,RACGAP1,KIF14,FAM83D,DSCC1,CDT1,TACC3,CDC6,BUB3,PLK1,ESPL1,NCAPH,ECT2,TRIP13,CDCA5,CDCA8,GEN1,SPAG5,KNL1,CCNB1,SMC3,KPNB1,CENPQ
M1	signal transduction involved in DNA integrity checkpoint	GO:0072401	0.00118798	6	BRCA1,CHEK2,CDKN1A,PLK1,PRKDC,DTL
M1	regulation of nuclear division	GO:0051783	7.98917e-09	18	MKI67,NUSAP1,SMC3,CENPE,PLK1,CDCA5,TRIP13,BMP4,GEN1,NEK2,RCC1,NDC80,CDT1,KIF11,UBE2C,CCNB1,TACC3,CDC6
M1	negative regulation of nuclear division	GO:0051784	0.000398679	7	NDC80,TRIP13,BMP4,GEN1,PLK1,CDT1,CCNB1
M1	sister chromatid segregation	GO:0000819	1.07016e-16	28	NUSAP1,KIF22,NCAPD3,KIF23,NCAPG,NDC80,CENPE,BUB1,FEN1,NCAPD2,RACGAP1,KIF14,DSCC1,CDT1,TACC3,CDC6,SMC2,PLK1,ESPL1,NCAPH,TRIP13,CDCA5,CDCA8,GEN1,SPAG5,CCNB1,SMC3,KPNB1
M1	negative regulation of mitotic nuclear division	GO:0045839	0.0003344	7	NDC80,TRIP13,BMP4,GEN1,PLK1,CDT1,CCNB1
M1	RNA-dependent DNA biosynthetic process	GO:0006278	0.0995478	5	CCT2,CCT6A,CCT8,TCP1,NEK2
M1	telomere maintenance	GO:0000723	0.00276323	10	BLM,TCP1,CCT8,CCT6A,NEK2,CCT2,PRKDC,DCLRE1B,RIF1,RPA1
M1	negative regulation of DNA metabolic process	GO:0051053	0.00959515	9	CHEK2,BLM,PARPBP,SMC3,MSH6,GMNN,RIF1,MSH2,DONSON
M1	regulation of cell cycle phase transition	GO:1901987	9.34186e-10	23	BLM,CDKN1A,PRKDC,CDK4,DONSON,BRCA1,NDC80,CENPE,UBE2C,DTL,KIF14,FAM83D,E2F1,CDT1,CDK1,CDC73,CDC6,PLK1,TRIP13,CDCA5,GEN1,CCNB1,CDC7
M1	negative regulation of cell cycle phase transition	GO:1901988	1.16732e-05	13	BRCA1,BLM,CDKN1A,NDC80,TRIP13,GEN1,PLK1,CDT1,PRKDC,CDC73,DTL,CCNB1,DONSON
M1	regulation of DNA biosynthetic process	GO:2000278	0.0112426	8	RFC4,DSCC1,CCT8,TCP1,CCT6A,NEK2,CCT2,CHTF18
M1	G2/M transition of mitotic cell cycle	GO:0000086	3.21424e-09	15	CHEK2,FOXM1,CDKN1A,CDC25C,BLM,KIF14,MASTL,CDK4,PLK1,CDC7,CDK1,DTL,CCNB1,DONSON,CCNA2
M1	signal transduction in response to DNA damage	GO:0042770	0.022943	7	BRCA1,FOXM1,CDKN1A,PLK1,CHEK2,PRKDC,DTL
M1	negative regulation of cell cycle G2/M phase transition	GO:1902750	0.024903	5	BRCA1,BLM,DTL,PLK1,DONSON
M1	regulation of metaphase/anaphase transition of cell cycle	GO:1902099	2.05692e-05	8	NDC80,CENPE,TRIP13,GEN1,PLK1,CDT1,CCNB1,CDC6
M1	organelle fission	GO:0048285	8.21761e-19	37	MKI67,NUSAP1,CCNB1,FLNA,NCAPD3,NEK2,KIF23,NCAPG,NDC80,CENPE,UBE2C,NCAPD2,CHEK2,RACGAP1,KIF14,BMP4,UBE2S,RCC1,PLK1,KIF2A,TACC3,CDC6,SMC2,DSCC1,ESPL1,NCAPH,TRIP13,CDCA5,CDCA8,GEN1,TPX2,SPAG5,KIF11,CDT1,KIF22,SMC3,KPNB1
M1	mitotic spindle assembly checkpoint	GO:0007094	0.000243705	6	PLK1,TRIP13,GEN1,NDC80,CDT1,CCNB1
M1	metaphase/anaphase transition of mitotic cell cycle	GO:0007091	2.81242e-06	9	NDC80,CENPE,TRIP13,GEN1,PLK1,CDT1,CCNB1,TACC3,CDC6
M1	mitotic cell cycle checkpoint	GO:0007093	3.52546e-06	13	CHEK2,BLM,CDKN1A,NDC80,KNTC1,TRIP13,GEN1,ZWILCH,PLK1,CDT1,PRKDC,CCNB1,DONSON
M1	regulation of G2/M transition of mitotic cell cycle	GO:0010389	0.000252942	8	BLM,CDK4,KIF14,CDK1,DTL,CCNB1,DONSON,CDC7
M1	positive regulation of telomere maintenance	GO:0032206	0.0405439	5	CCT2,CCT6A,CCT8,TCP1,NEK2
M1	telomere organization	GO:0032200	0.00276323	10	BLM,TCP1,CCT8,CCT6A,NEK2,CCT2,PRKDC,DCLRE1B,RIF1,RPA1
M1	DNA biosynthetic process	GO:0071897	0.00116566	11	RFC4,DSCC1,TCP1,CCT8,CCT6A,CHTF18,NEK2,CCT2,POLE,PCNA,DTL
M1	mitotic spindle checkpoint	GO:0071174	0.000243705	6	PLK1,TRIP13,GEN1,NDC80,CDT1,CCNB1
M1	spindle assembly checkpoint	GO:0071173	0.000243705	6	PLK1,TRIP13,GEN1,NDC80,CDT1,CCNB1
M1	spindle checkpoint	GO:0031577	0.000243705	6	PLK1,TRIP13,GEN1,NDC80,CDT1,CCNB1
M1	G2 DNA damage checkpoint	GO:0031572	0.0089744	5	BRCA1,BLM,DTL,PLK1,DONSON
M1	DNA integrity checkpoint	GO:0031570	1.81495e-05	12	BRCA1,BLM,CDKN1A,PLK1,CHEK2,INTS7,E2F1,DNA2,CDT1,PRKDC,DTL,DONSON
M1	positive regulation of chromosome organization	GO:2001252	0.0226735	9	BRCA1,AUTS2,TCP1,CCT8,CCT6A,NEK2,CCT2,CDT1,FEN1
M1	negative regulation of chromosome organization	GO:2001251	0.0169731	8	BRCA1,NDC80,TRIP13,GEN1,TOP2A,PLK1,CDT1,CCNB1
M1	signal transduction involved in mitotic DNA damage checkpoint	GO:1902402	0.0449601	3	CHEK2,CDKN1A,PRKDC
M1	signal transduction involved in mitotic DNA integrity checkpoint	GO:1902403	0.0449601	3	CHEK2,CDKN1A,PRKDC
M1	regulation of mitotic metaphase/anaphase transition	GO:0030071	2.05692e-05	8	NDC80,CENPE,TRIP13,GEN1,PLK1,CDT1,CCNB1,CDC6
M1	telomere maintenance via telomere lengthening	GO:0010833	0.0410483	6	CCT8,TCP1,CCT6A,NEK2,CCT2,DCLRE1B
M1	negative regulation of chromosome segregation	GO:0051985	0.000674771	6	PLK1,TRIP13,GEN1,NDC80,CDT1,CCNB1
M1	regulation of chromosome segregation	GO:0051983	2.557e-10	17	MKI67,NDC80,ECT2,CENPE,RACGAP1,CDCA5,TRIP13,GEN1,NEK2,PLK1,CDT1,SPAG5,CCNB1,BUB1,TACC3,FEN1,CDC6
M1	negative regulation of cell cycle process	GO:0010948	1.3956e-08	20	BRCA1,BLM,CDKN1A,NDC80,CHEK2,SMC3,TRIP13,BMP4,CCNF,GEN1,NEK2,KAT2B,PLK1,CDT1,PRKDC,CDC73,DTL,CCNB1,DONSON,CDK4
M1	anatomical structure homeostasis	GO:0060249	0.0144559	11	BLM,TCP1,CCT8,CDH3,CCT6A,NEK2,CCT2,PRKDC,DCLRE1B,RIF1,RPA1
M1	negative regulation of mitotic cell cycle	GO:0045930	2.24832e-05	15	CHEK2,BLM,CDKN1A,NDC80,KNTC1,TRIP13,BMP4,GEN1,ZWILCH,PLK1,CDT1,PRKDC,CDC73,CCNB1,DONSON
M1	signal transduction involved in cell cycle checkpoint	GO:0072395	0.0014704	6	BRCA1,CHEK2,CDKN1A,PLK1,PRKDC,DTL
M1	mitotic sister chromatid segregation	GO:0000070	2.97854e-15	25	NUSAP1,KIF22,NCAPD3,KIF23,NCAPG,NDC80,CENPE,NCAPD2,RACGAP1,KIF14,DSCC1,CDT1,TACC3,CDC6,SMC2,PLK1,ESPL1,NCAPH,TRIP13,CDCA5,CDCA8,GEN1,SPAG5,CCNB1,KPNB1
M1	DNA damage checkpoint	GO:0000077	0.000363441	10	BRCA1,BLM,CDKN1A,PLK1,CHEK2,INTS7,E2F1,PRKDC,DTL,DONSON
M1	cell cycle checkpoint	GO:0000075	2.76483e-08	18	BRCA1,BLM,CDKN1A,NDC80,CHEK2,KNTC1,INTS7,PLK1,TRIP13,E2F1,GEN1,ZWILCH,DNA2,CDT1,PRKDC,DTL,CCNB1,DONSON
M1	regulation of chromosome separation	GO:1905818	6.34158e-06	9	NDC80,CENPE,TRIP13,GEN1,PLK1,CDT1,CCNB1,TACC3,CDC6
M1	negative regulation of chromosome separation	GO:1905819	0.000243705	6	PLK1,TRIP13,GEN1,NDC80,CDT1,CCNB1
M1	cellular response to ionizing radiation	GO:0071479	0.05355	5	RAD51,BLM,CDKN1A,ECT2,INTS7
M1	cell cycle G2/M phase transition	GO:0044839	7.44245e-09	16	BRCA1,FOXM1,CDKN1A,PLK1,CHEK2,BLM,KIF14,MASTL,CDK4,CDC25C,CDC7,CDK1,DTL,CCNB1,DONSON,CCNA2
M1	negative regulation of organelle organization	GO:0010639	0.0161076	13	BRCA1,CCNF,PLK1,TRIP13,BMP4,GEN1,NEK2,TOP2A,KAT2B,NDC80,CDT1,STMN1,CCNB1
M1	regulation of chromosome organization	GO:0033044	9.94014e-06	20	BRCA1,NDC80,CCT8,CENPE,PLK1,CDCA5,TRIP13,CCT6A,GEN1,NEK2,CCT2,TOP2A,TCP1,CDT1,CCNB1,BUB1,TACC3,FEN1,CDC6,AUTS2
M1	regulation of sister chromatid segregation	GO:0033045	2.69425e-07	12	NDC80,CENPE,TRIP13,CDCA5,CCNB1,GEN1,PLK1,CDT1,BUB1,TACC3,FEN1,CDC6
M1	negative regulation of sister chromatid segregation	GO:0033046	0.000674771	6	PLK1,TRIP13,GEN1,NDC80,CDT1,CCNB1
M1	regulation of mitotic sister chromatid segregation	GO:0033047	3.07297e-05	9	NDC80,CENPE,TRIP13,GEN1,PLK1,CDT1,CCNB1,TACC3,CDC6
M1	negative regulation of mitotic sister chromatid segregation	GO:0033048	0.000521968	6	PLK1,TRIP13,GEN1,NDC80,CDT1,CCNB1
M1	negative regulation of cell cycle	GO:0045786	1.18338e-08	28	BLM,CDKN1A,CCNF,KNTC1,BMP4,ZWILCH,KAT2B,DONSON,BRCA1,NDC80,SMC3,INTS7,DTL,CHEK2,CDK4,E2F1,DNA2,CDT1,PRKDC,CDC73,NEK2,TAF6,PLK1,TRIP13,FOXM1,GMNN,GEN1,CCNB1
M1	metaphase/anaphase transition of cell cycle	GO:0044784	2.81242e-06	9	NDC80,CENPE,TRIP13,GEN1,PLK1,CDT1,CCNB1,TACC3,CDC6
M1	signal transduction involved in mitotic cell cycle checkpoint	GO:0072413	0.0449601	3	CHEK2,CDKN1A,PRKDC
M1	mitotic sister chromatid separation	GO:0051306	3.66389e-06	9	NDC80,CENPE,TRIP13,GEN1,PLK1,CDT1,CCNB1,TACC3,CDC6
M1	chromosome separation	GO:0051304	2.5082e-05	9	NDC80,CENPE,TRIP13,GEN1,PLK1,CDT1,CCNB1,TACC3,CDC6
M1	regulation of telomere maintenance via telomerase	GO:0032210	0.0513241	5	CCT2,CCT6A,CCT8,TCP1,NEK2
M1	telomere maintenance via telomerase	GO:0007004	0.0711785	5	CCT2,CCT6A,CCT8,TCP1,NEK2
M1	regulation of mitotic sister chromatid separation	GO:0010965	2.81242e-06	9	NDC80,CENPE,TRIP13,GEN1,PLK1,CDT1,CCNB1,TACC3,CDC6
M1	regulation of cell cycle G1/S phase transition	GO:1902806	0.0519805	6	CDKN1A,KIF14,FAM83D,E2F1,PRKDC,CDC73
M1	cell cycle G1/S phase transition	GO:0044843	0.00335503	10	CDKN1A,KIF14,FAM83D,E2F1,RCC1,POLE,PRKDC,CDC73,CCNA2,CDK4
M1	negative regulation of DNA replication	GO:0008156	0.0226539	4	CHEK2,DONSON,GMNN,SMC3
M1	protein localization to chromosome	GO:0034502	1.13921e-07	14	CENPA,NDC80,TCP1,CCT8,PLK1,CDCA5,CCT6A,CCT2,BRCA2,CDT1,CDK1,KNL1,CENPQ,RPA1
M1	regulation of DNA replication	GO:0006275	4.26673e-07	12	CHEK2,BLM,DNA2,SMC3,RFC4,GMNN,CHTF18,DSCC1,CDT1,PCNA,DONSON,CDC7
M1	DNA replication	GO:0006260	9.34186e-10	19	RAD51,BLM,BRCA2,CHEK2,RPA1,SMC3,BAZ1A,MCM2,POLE,GMNN,CHTF18,DSCC1,CDT1,DNA2,RFC4,PCNA,CDC7,DONSON,FEN1
M1	protein localization to chromosome, telomeric region	GO:0070198	0.0089744	5	CCT2,BRCA2,CCT6A,CCT8,TCP1
M1	DNA conformation change	GO:0071103	2.49812e-09	19	RAD51,BLM,NUSAP1,NCAPH,TOP2A,CDCA5,ASF1B,MCM4,NCAPD3,MCM6,SMC2,DNA2,CHAF1A,RAD54L,NCAPG,HJURP,ASCC3,NCAPD2,RUVBL1
M1	DNA packaging	GO:0006323	3.2928e-05	11	SMC2,NUSAP1,NCAPH,CDCA5,ASF1B,NCAPD3,TOP2A,CHAF1A,NCAPG,HJURP,NCAPD2
M1	protein-DNA complex assembly	GO:0065004	0.00413089	8	RAD51,CENPA,ASF1B,GMNN,CHAF1A,CDT1,HJURP,CENPW
M1	covalent chromatin modification	GO:0016569	0.0508861	15	BRCA1,CCNA2,BRCA2,AUTS2,HDAC9,UHRF1,PRMT1,KDM5B,KAT2B,CDK1,SUZ12,CDC73,HDAC2,RNF2,RUVBL1
M1	protein-DNA complex subunit organization	GO:0071824	0.0161076	8	RAD51,CENPA,ASF1B,GMNN,CHAF1A,CDT1,HJURP,CENPW
M1	regulation of sister chromatid cohesion	GO:0007063	0.0764991	3	CDCA5,BUB1,FEN1
M1	sister chromatid cohesion	GO:0007062	0.00599422	6	BUB1,SMC3,CDCA5,DSCC1,KIF22,FEN1
M1	histone modification	GO:0016570	0.0457373	15	BRCA1,CCNA2,BRCA2,AUTS2,HDAC9,UHRF1,PRMT1,KDM5B,KAT2B,CDK1,SUZ12,CDC73,HDAC2,RNF2,RUVBL1
M1	G1/S transition of mitotic cell cycle	GO:0000082	0.0188522	8	CDKN1A,KIF14,E2F1,RCC1,POLE,PRKDC,CDC73,CDK4
M1	negative regulation of DNA recombination	GO:0045910	0.000878745	5	MSH2,BLM,PARPBP,MSH6,RIF1
M1	regulation of DNA recombination	GO:0000018	0.00163343	7	RAD51,BLM,PARPBP,MSH6,RIF1,MSH2,TFRC
M1	response to antimetabolite	GO:0097329	0.0761823	2	BLM,TIMELESS
M1	regulation of DNA-dependent DNA replication	GO:0090329	6.42958e-08	10	CHEK2,BLM,DSCC1,SMC3,RFC4,GMNN,CHTF18,CDT1,DONSON,CDC7
M1	response to camptothecin	GO:1901563	0.029305	2	RAD51,BLM
M1	response to antineoplastic agent	GO:0097327	0.0323258	4	RAD51,BLM,TIMELESS,BRCA1
M1	DNA double-strand break processing	GO:0000729	0.0449601	3	BLM,DNA2,RBBP8
M1	DNA-dependent DNA replication maintenance of fidelity	GO:0045005	0.0405439	4	RAD51,BLM,BRCA2,DONSON
M1	cellular response to hydroxyurea	GO:0072711	0.0610297	2	BLM,TIMELESS
M1	response to hydroxyurea	GO:0072710	0.0761823	2	BLM,TIMELESS
M1	DNA duplex unwinding	GO:0032508	6.82539e-05	8	RAD51,BLM,DNA2,MCM4,MCM6,TOP2A,ASCC3,RUVBL1
M1	DNA recombination	GO:0006310	9.55452e-05	13	RAD51,BLM,PARPBP,BRCA2,EXO1,RPA1,RBBP8,MSH6,GEN1,RIF1,MSH2,BRCA1,TFRC
M1	DNA-dependent DNA replication	GO:0006261	3.17028e-10	16	RAD51,BLM,BRCA2,CHEK2,SMC3,BAZ1A,MCM2,GMNN,CDC7,CHTF18,DSCC1,CDT1,DNA2,RFC4,DONSON,FEN1
M1	DNA geometric change	GO:0032392	2.5082e-05	9	RAD51,BLM,DNA2,MCM4,MCM6,TOP2A,RAD54L,ASCC3,RUVBL1
M1	regulation of cell division	GO:0051302	9.19648e-06	13	KIF20A,BLM,PLK1,ECT2,RACGAP1,KIF14,CIT,ORC6,KIF20B,KIF23,KIF18B,CDC6,PRC1
M1	cell division	GO:0051301	3.89916e-10	23	KIF20A,BLM,NUSAP1,KIF23,CENPA,BRCA2,ORC6,ANLN,KIF18B,RACGAP1,KIF14,CDT1,GNAI3,CKAP2,TEAD3,CDC6,PRC1,PLK1,ECT2,CIT,KIF20B,CEP55,STMN1
M1	cellular response to camptothecin	GO:0072757	0.029305	2	RAD51,BLM
M1	establishment of protein localization to organelle	GO:0072594	0.0969587	9	BRCA2,TCP1,CCT8,BMP4,CCT6A,CCT2,TOMM40,HK2,KPNB1
M1	positive regulation of histone H4-K16 acetylation	GO:2000620	0.0138553	2	BRCA1,AUTS2
M1	recombinational repair	GO:0000725	0.0089744	8	RAD51,BRCA1,PARPBP,BRCA2,RPA1,RBBP8,GEN1,RIF1
M1	double-strand break repair via homologous recombination	GO:0000724	0.00852267	8	RAD51,BRCA1,PARPBP,BRCA2,RPA1,RBBP8,GEN1,RIF1
M1	positive regulation of cell cycle process	GO:0090068	2.54183e-13	26	CDKN1A,NUSAP1,KIF23,BRCA1,NDC80,UBE2C,DTL,FEN1,RACGAP1,KIF14,FAM83D,GPSM2,CDT1,CDK1,CDC73,CDC6,CCNB1,ECT2,CIT,CDCA5,PLK4,GEN1,KIF20B,SPAG5,CDK4,CDC7
M1	regulation of histone H4-K16 acetylation	GO:2000618	0.0456581	2	BRCA1,AUTS2
M1	positive regulation of histone H4 acetylation	GO:0090240	0.0909036	2	BRCA1,AUTS2
M1	postreplication repair	GO:0006301	0.00771121	4	BRCA1,DTL,MSH2,PCNA
M1	protein K6-linked ubiquitination	GO:0085020	0.0115743	3	BRCA1,UBE2T,UBE2S
M1	mitotic cytokinesis	GO:0000281	7.44245e-09	13	KIF20A,CENPA,PLK1,ECT2,RACGAP1,CIT,ANLN,NUSAP1,BRCA2,STMN1,CKAP2,CEP55,KIF23
M1	establishment of protein localization to telomere	GO:0070200	0.00117016	5	CCT2,BRCA2,CCT6A,CCT8,TCP1
M1	microtubule organizing center organization	GO:0031023	9.96541e-08	16	CKAP5,CCNF,SLC16A1,PLK1,STIL,HAUS8,PLK4,CEP152,NEK2,KAT2B,BRCA2,GEN1,CEP76,KIF11,SSX2IP,CENPJ
M1	centrosome duplication	GO:0051298	0.000113709	9	CENPJ,BRCA2,PLK4,GEN1,KAT2B,CEP152,CEP76,STIL,CCNF
M1	cytokinesis	GO:0000910	1.37279e-07	17	KIF20A,CENPA,NUSAP1,ECT2,RACGAP1,KIF14,PLK1,ANLN,KIF20B,BRCA2,KIF23,CIT,CKAP2,PRC1,CEP55,CDC6,STMN1
M1	cytoskeleton-dependent cytokinesis	GO:0061640	1.95081e-08	13	KIF20A,CENPA,PLK1,ECT2,RACGAP1,CIT,ANLN,NUSAP1,BRCA2,STMN1,CKAP2,CEP55,KIF23
M1	nuclear DNA replication	GO:0033260	0.000134448	5	CHEK2,BRCA2,CDT1,GMNN,CDC7
M1	centrosome cycle	GO:0007098	4.68984e-08	16	CKAP5,CCNF,SLC16A1,PLK1,STIL,HAUS8,PLK4,CEP152,NEK2,KAT2B,BRCA2,GEN1,CEP76,KIF11,SSX2IP,CENPJ
M1	mitotic DNA replication	GO:1902969	0.0138553	2	CHEK2,BRCA2
M1	nucleotide-excision repair	GO:0006289	0.0788383	4	POLE,BRCA2,RBBP8,RPA1
M1	microtubule cytoskeleton organization	GO:0000226	2.16742e-16	40	KIF20A,NUSAP1,AURKA,HAUS8,FLNA,NEK2,KAT2B,CCNF,KIF23,CENPJ,CENPA,NDC80,CENPE,GAS2L3,SSX2IP,TPX2,CHEK2,CKAP5,ASPM,RACGAP1,GPSM2,RCC1,BRCA2,KIF2A,STMN1,CEP76,STIL,TACC3,KIF18B,SKA3,PLK1,SMC3,SLC16A1,PLK4,GEN1,CEP152,SPAG5,KIF11,CCNB1,KPNB1
M1	establishment of protein localization to chromosome	GO:0070199	0.00576747	5	CCT2,BRCA2,CCT6A,CCT8,TCP1
M1	cell cycle DNA replication	GO:0044786	6.34168e-05	6	CHEK2,BRCA2,SMC3,GMNN,CDT1,CDC7
M1	pyrimidine-containing compound biosynthetic process	GO:0072528	0.0610297	2	CAD,CTPS1
M1	regulation of G1/S transition of mitotic cell cycle	GO:2000045	0.0793983	5	KIF14,CDC73,CDKN1A,E2F1,PRKDC
M1	positive regulation of mitotic cell cycle phase transition	GO:1901992	6.82539e-05	8	CCNB1,CDCA5,CDT1,CDK1,UBE2C,DTL,CDK4,CDC7
M1	spindle organization	GO:0007051	9.37474e-13	23	AURKA,HAUS8,FLNA,KIF23,NDC80,CENPE,TPX2,CHEK2,CKAP5,ASPM,RACGAP1,GPSM2,RCC1,KIF2A,STMN1,STIL,TACC3,PLK1,SMC3,SPAG5,KIF11,CCNB1,KPNB1
M1	mitotic spindle organization	GO:0007052	1.47e-10	18	CHEK2,NDC80,SMC3,CENPE,RACGAP1,GPSM2,FLNA,RCC1,PLK1,KIF2A,KIF23,KIF11,CCNB1,STIL,TACC3,KPNB1,TPX2,STMN1
M1	establishment of organelle localization	GO:0051656	3.52546e-06	17	CENPA,NUSAP1,CENPE,KIT,KIF14,CDH3,FAM83D,GPSM2,KPNB1,NDC80,CDT1,CDCA8,SPAG5,CCNB1,KIF22,CDCA5,CENPQ
M1	regulation of mitotic spindle checkpoint	GO:1903504	0.00453939	4	CCNB1,NDC80,CDT1,GEN1
M1	positive regulation of ATP metabolic process	GO:1903580	0.0392288	3	CCNB1,ENO1,CDK1
M1	mitotic metaphase plate congression	GO:0007080	3.69257e-05	9	NDC80,CENPE,CDCA8,KIF14,CDCA5,CCNB1,CDT1,KIF22,KPNB1
M1	microtubule cytoskeleton organization involved in mitosis	GO:1902850	6.99624e-12	20	CHEK2,CENPA,NDC80,SMC3,CENPE,RACGAP1,PLK1,GPSM2,FLNA,RCC1,NUSAP1,KIF2A,KIF23,KIF11,CCNB1,STIL,TACC3,KPNB1,TPX2,STMN1
M1	metaphase plate congression	GO:0051310	5.15448e-07	12	CDCA5,NDC80,CENPE,CDCA8,KIF14,FAM83D,CCNB1,CDT1,SPAG5,KIF22,KPNB1,CENPQ
M1	regulation of spindle checkpoint	GO:0090231	0.00453939	4	CCNB1,NDC80,CDT1,GEN1
M1	attachment of spindle microtubules to kinetochore	GO:0008608	2.76483e-08	10	BUB3,NDC80,ECT2,CENPE,RACGAP1,NEK2,CDT1,SPAG5,KNL1,CCNB1
M1	positive regulation of cell cycle phase transition	GO:1901989	3.87719e-06	10	CCNB1,FAM83D,CDCA5,UBE2C,CDT1,CDK1,CDC73,DTL,CDK4,CDC7
M1	regulation of oxidative phosphorylation	GO:0002082	0.0267192	3	SHMT2,CCNB1,CDK1
M1	positive regulation of cell cycle G2/M phase transition	GO:1902751	0.00117016	5	CCNB1,DTL,CDK4,CDC7,CDK1
M1	organelle localization	GO:0051640	3.57019e-05	18	KPNB1,CENPA,NUSAP1,CENPE,CDCA8,KIF14,CDH3,FAM83D,GPSM2,ASPM,KIT,NDC80,CDT1,SPAG5,CCNB1,KIF22,CDCA5,CENPQ
M1	regulation of cellular respiration	GO:0043457	0.0267192	3	SHMT2,CCNB1,CDK1
M1	positive regulation of oxidative phosphorylation	GO:1903862	0.0456581	2	CCNB1,CDK1
M1	positive regulation of cellular respiration	GO:1901857	0.0456581	2	CCNB1,CDK1
M1	positive regulation of G2/M transition of mitotic cell cycle	GO:0010971	0.000878745	5	CCNB1,DTL,CDK4,CDC7,CDK1
M1	regulation of attachment of spindle microtubules to kinetochore	GO:0051988	0.000227125	5	CCNB1,SPAG5,NEK2,ECT2,RACGAP1
M1	positive regulation of chromosome segregation	GO:0051984	0.0195817	4	CCNB1,CDT1,FEN1,CDC6
M1	chromosome localization	GO:0050000	6.2046e-07	12	CDCA5,NDC80,CENPE,CDCA8,KIF14,FAM83D,CCNB1,CDT1,SPAG5,KIF22,KPNB1,CENPQ
M1	positive regulation of mitochondrial ATP synthesis coupled electron transport	GO:1905448	0.029305	2	CCNB1,CDK1
M1	regulation of mitochondrial ATP synthesis coupled electron transport	GO:1905446	0.029305	2	CCNB1,CDK1
M1	regulation of generation of precursor metabolites and energy	GO:0043467	0.0963018	4	SHMT2,PASK,CCNB1,CDK1
M1	establishment of chromosome localization	GO:0051303	6.2046e-07	12	CDCA5,NDC80,CENPE,CDCA8,KIF14,FAM83D,CCNB1,CDT1,SPAG5,KIF22,KPNB1,CENPQ
M1	regulation of mitotic cell cycle spindle assembly checkpoint	GO:0090266	0.00453939	4	CCNB1,NDC80,CDT1,GEN1
M1	regulation of cell cycle checkpoint	GO:1901976	0.029305	4	CCNB1,NDC80,CDT1,GEN1
M1	regulation of cytoskeleton organization	GO:0051493	0.00241068	18	VASP,CCNF,SMC3,STIL,GPSM2,PLK4,GEN1,NEK2,ACTR3,KAT2B,PLK1,STMN1,CEP76,KIF11,SPAG5,CENPJ,TACC3,SKA3
M1	regulation of microtubule cytoskeleton organization	GO:0070507	1.69303e-06	16	CCNF,SMC3,SPAG5,PLK4,GEN1,NEK2,KAT2B,PLK1,STMN1,GPSM2,CEP76,KIF11,STIL,CENPJ,TACC3,SKA3
M1	regulation of centrosome duplication	GO:0010824	0.000398679	7	CENPJ,CCNF,PLK4,GEN1,KAT2B,CEP76,STIL
M1	negative regulation of centrosome cycle	GO:0046606	0.0323258	3	KAT2B,CCNF,NEK2
M1	regulation of centrosome cycle	GO:0046605	3.07297e-05	9	CENPJ,CCNF,PLK4,GEN1,NEK2,KAT2B,CEP76,KIF11,STIL
M1	regulation of microtubule-based process	GO:0032886	1.07134e-05	16	CCNF,SMC3,SPAG5,PLK4,GEN1,NEK2,KAT2B,PLK1,STMN1,GPSM2,CEP76,KIF11,STIL,CENPJ,TACC3,SKA3
M1	positive regulation of cellular protein localization	GO:1903829	0.0225949	11	NDC80,TCP1,CCT8,GPSM2,CCT6A,CCT2,ICE1,CDT1,MSN,CDK1,CENPQ
M1	positive regulation of establishment of protein localization to telomere	GO:1904851	0.00240764	4	CCT2,CCT6A,CCT8,TCP1
M1	regulation of protein stability	GO:0031647	0.0895627	10	CHEK2,PLK1,TCP1,CCT8,FLNA,CCT6A,AURKA,CCT2,CDC73,CDK7
M1	regulation of establishment of protein localization to telomere	GO:0070203	0.00335503	4	CCT2,CCT6A,TCP1,CCT8
M1	regulation of establishment of protein localization to chromosome	GO:0070202	0.00453939	4	CCT2,CCT6A,CCT8,TCP1
M1	positive regulation of DNA biosynthetic process	GO:2000573	0.000798318	8	RFC4,DSCC1,CCT8,TCP1,CCT6A,NEK2,CCT2,CHTF18
M1	positive regulation of telomere maintenance via telomerase	GO:0032212	0.0121136	5	CCT2,CCT6A,CCT8,TCP1,NEK2
M1	positive regulation of protein localization to chromosome, telomeric region	GO:1904816	0.00453939	4	CCT2,CCT6A,TCP1,CCT8
M1	regulation of protein localization to chromosome, telomeric region	GO:1904814	0.00771121	4	CCT2,CCT6A,CCT8,TCP1
M1	protein localization to chromosome, centromeric region	GO:0071459	0.000243705	6	CENPA,NDC80,CDT1,CDK1,KNL1,CENPQ
M1	protein localization to kinetochore	GO:0034501	0.000878745	5	KNL1,NDC80,CDT1,CENPQ,CDK1
M1	regulation of cytokinesis	GO:0032465	0.000363441	10	KIF20A,PLK1,ECT2,RACGAP1,KIF14,CIT,KIF20B,KIF23,CDC6,PRC1
M1	positive regulation of cytokinesis	GO:0032467	0.000464461	7	ECT2,RACGAP1,KIF14,CIT,KIF20B,KIF23,CDC6
M1	positive regulation of cell division	GO:0051781	0.000900407	7	ECT2,RACGAP1,KIF14,CIT,KIF20B,KIF23,CDC6
M1	positive regulation of ubiquitin-protein transferase activity	GO:0051443	0.0764991	3	UBE2S,PLK1,CDC20
M1	regulation of ubiquitin protein ligase activity	GO:1904666	0.00959515	4	UBE2S,PLK1,FBXO5,CDC20
M1	positive regulation of ubiquitin protein ligase activity	GO:1904668	0.00762337	3	UBE2S,PLK1,CDC20
M1	anaphase-promoting complex-dependent catabolic process	GO:0031145	0.00762337	3	UBE2C,UBE2S,CDC20
M1	regulation of ubiquitin-protein transferase activity	GO:0051438	0.0761823	4	UBE2S,PLK1,CDC20,FBXO5
M1	regulation of fibroblast proliferation	GO:0048145	0.0788383	4	CDC73,CDKN1A,CDK4,E2F1
M1	fibroblast proliferation	GO:0048144	0.0838069	4	CDC73,CDKN1A,CDK4,E2F1
M1	spindle localization	GO:0051653	0.000243705	6	ASPM,NUSAP1,GPSM2,CENPA,NDC80,KPNB1
M1	centromere complex assembly	GO:0034508	0.0323258	3	CENPA,HJURP,CENPW
M1	establishment of spindle orientation	GO:0051294	0.0449601	3	CENPA,NDC80,GPSM2
M1	establishment of mitotic spindle localization	GO:0040001	0.000459351	5	CENPA,NUSAP1,NDC80,GPSM2,KPNB1
M1	establishment or maintenance of cell polarity	GO:0007163	0.0793983	5	CKAP5,CENPA,NDC80,MSN,GPSM2
M1	establishment of spindle localization	GO:0051293	0.00205797	5	NUSAP1,CENPA,NDC80,KPNB1,GPSM2
M1	establishment of mitotic spindle orientation	GO:0000132	0.0267192	3	CENPA,NDC80,GPSM2
M1	kinetochore organization	GO:0051383	0.00335503	4	CENPA,NDC80,CDT1,CENPW
M1	attachment of mitotic spindle microtubules to kinetochore	GO:0051315	0.0267192	3	NDC80,CDT1,CENPE
M1	mitotic chromosome movement towards spindle pole	GO:0007079	0.0138553	2	KPNB1,CENPE
M1	chromosome movement towards spindle pole	GO:0051305	0.0138553	2	KPNB1,CENPE
M1	spindle assembly	GO:0051225	9.74255e-08	14	CHEK2,GPSM2,SMC3,RACGAP1,HAUS8,FLNA,RCC1,PLK1,KIF2A,KIF23,SPAG5,KIF11,KPNB1,TPX2
M1	nucleobase-containing small molecule biosynthetic process	GO:0034404	0.0833947	5	CTPS1,ENO1,PDE4B,PGK1,DNPH1
M1	deoxyribonucleoside monophosphate metabolic process	GO:0009162	0.0456581	2	DCK,DNPH1
M1	positive regulation of DNA replication	GO:0045740	0.00771121	4	DNA2,CDT1,CDC7,PCNA
M1	lagging strand elongation	GO:0006273	0.029305	2	DNA2,FEN1
M1	DNA strand elongation involved in DNA replication	GO:0006271	0.029305	2	DNA2,FEN1
M1	DNA replication, Okazaki fragment processing	GO:0033567	0.0138553	2	DNA2,FEN1
M1	DNA replication checkpoint	GO:0000076	0.0610297	2	DNA2,CDT1
M1	nucleic acid phosphodiester bond hydrolysis	GO:0090305	0.0968846	8	DNA2,EXO1,RBBP8,GEN1,PCNA,AGO2,DCLRE1B,FEN1
M1	base-excision repair	GO:0006284	0.0471225	4	POLE,DNA2,RPA1,UNG
M1	DNA replication, removal of RNA primer	GO:0043137	0.0138553	2	DNA2,FEN1
M1	regulation of spindle organization	GO:0090224	0.0274399	5	SPAG5,GPSM2,TACC3,SMC3,PLK1
M1	regulation of mitotic spindle organization	GO:0060236	0.0711818	4	GPSM2,TACC3,SMC3,PLK1
M1	positive regulation of spindle assembly	GO:1905832	0.0456581	2	GPSM2,SPAG5
M1	regulation of organelle assembly	GO:1902115	0.0100357	10	CENPJ,SMC3,GPSM2,PLK4,KAT2B,PLK1,CEP76,SPAG5,STIL,MSN
M1	regulation of spindle assembly	GO:0090169	0.0364004	4	SPAG5,GPSM2,SMC3,PLK1
M1	telomere maintenance in response to DNA damage	GO:0043247	0.0909036	2	DCLRE1B,RIF1
M1	positive regulation of double-strand break repair	GO:2000781	0.0578758	3	FOXM1,TIMELESS,RIF1
M1	regulation of double-strand break repair	GO:2000779	0.0614827	5	RAD51,FOXM1,PARPBP,TIMELESS,RIF1
M1	mitotic spindle assembly	GO:0090307	7.58443e-06	10	CHEK2,PLK1,SMC3,RACGAP1,FLNA,KIF2A,KIF23,KIF11,KPNB1,TPX2
M1	transcription by RNA polymerase I	GO:0006360	0.0666055	4	PWP1,FLNA,NOL11,HEATR1
M1	regulation of transcription by RNA polymerase I	GO:0006356	0.0405439	4	PWP1,FLNA,NOL11,HEATR1
M1	mismatch repair	GO:0006298	0.00117016	5	MSH2,MSH6,EXO1,RPA1,PCNA
M1	positive regulation of helicase activity	GO:0051096	0.0761823	2	MSH6,MSH2
M1	ubiquitin recycling	GO:0010992	0.00762337	3	IDE,UBE2C,UBE2S
M1	regulation of interleukin-1-mediated signaling pathway	GO:2000659	0.0456581	2	VRK2,IL1RN
M1	regulation of mitotic centrosome separation	GO:0046602	0.0761823	2	KIF11,NEK2
M1	mitotic centrosome separation	GO:0007100	0.0909036	2	KIF11,NEK2
M1	Ran protein signal transduction	GO:0031291	0.029305	2	GPSM2,KPNB1
M1	positive regulation of transcription by RNA polymerase I	GO:0045943	0.0909036	3	PWP1,NOL11,HEATR1
M1	DNA replication initiation	GO:0006270	0.0761823	2	MCM2,CDT1
M1	centriole assembly	GO:0098534	0.0104199	5	CENPJ,KAT2B,STIL,PLK4,CEP76
M1	protein monoubiquitination	GO:0006513	0.0673178	5	FANCL,UBE2T,DTL,RNF2,CDC73
M1	centriole replication	GO:0007099	0.0089744	5	CENPJ,KAT2B,STIL,PLK4,CEP76
M1	regulation of centriole replication	GO:0046599	0.000878745	5	STIL,KAT2B,CENPJ,PLK4,CEP76
M1	DNA synthesis involved in DNA repair	GO:0000731	0.0703693	3	POLE,DTL,PCNA
M1	positive regulation of mitotic nuclear division	GO:0045840	0.0624263	4	UBE2C,CDCA5,NUSAP1,CDT1
M1	positive regulation of nuclear division	GO:0051785	0.0711818	4	UBE2C,CDCA5,NUSAP1,CDT1
M1	nucleus organization	GO:0006997	0.0237371	6	NUP133,PLK1,ANKLE2,NUP107,NUP205,NUP155
M1	nuclear envelope organization	GO:0006998	0.0909036	3	PLK1,ANKLE2,NUP155
M1	regulation of DNA-directed DNA polymerase activity	GO:1900262	0.00762337	3	RFC4,CHTF18,DSCC1
M1	positive regulation of DNA-directed DNA polymerase activity	GO:1900264	0.00762337	3	RFC4,CHTF18,DSCC1
M1	protein K27-linked ubiquitination	GO:0044314	0.0456581	2	UBE2T,UBE2S
M1	exit from mitosis	GO:0010458	0.0635266	3	UBE2C,CDCA5,UBE2S
M1	ribonucleoprotein complex export from nucleus	GO:0071426	0.0982279	4	NUP107,XPOT,NUP133,NUP160
M1	positive regulation of telomerase RNA localization to Cajal body	GO:1904874	0.0456581	2	CCT2,TCP1
M1	scaRNA localization to Cajal body	GO:0090666	0.0610297	2	CCT2,TCP1
M1	regulation of telomerase RNA localization to Cajal body	GO:1904872	0.0909036	2	CCT2,TCP1
M1	chromosome condensation	GO:0030261	1.80632e-07	8	SMC2,NUSAP1,NCAPH,CDCA5,NCAPD3,TOP2A,NCAPG,NCAPD2
M1	positive regulation of spindle checkpoint	GO:0090232	0.0909036	2	NDC80,GEN1
M1	positive regulation of mitotic cell cycle spindle assembly checkpoint	GO:0090267	0.0909036	2	NDC80,GEN1
M1	nuclear pore organization	GO:0006999	0.0392288	3	NUP133,NUP107,NUP205
M1	positive regulation of DNA-dependent DNA replication	GO:2000105	0.0761823	2	CDT1,CDC7
M1	regulation of nuclear cell cycle DNA replication	GO:0033262	0.0610297	2	CHEK2,CDC7
M1	negative regulation of DNA-dependent DNA replication	GO:2000104	0.00335503	4	CHEK2,DONSON,GMNN,SMC3
M1	spindle elongation	GO:0051231	0.0909036	2	KIF23,RACGAP1
M1	mitotic spindle elongation	GO:0000022	0.0909036	2	KIF23,RACGAP1
M1	spindle midzone assembly	GO:0051255	0.0909036	2	KIF23,RACGAP1
M1	mitotic spindle midzone assembly	GO:0051256	0.0761823	2	KIF23,RACGAP1
M1	mitotic chromosome condensation	GO:0007076	4.61769e-07	7	SMC2,NUSAP1,NCAPH,CDCA5,NCAPD3,NCAPG,NCAPD2
M1	positive regulation of protein localization to kinetochore	GO:1905342	0.00213284	3	NDC80,CDT1,CENPQ
M1	regulation of protein localization to kinetochore	GO:1905340	0.00213284	3	NDC80,CDT1,CENPQ
M1	positive regulation of exit from mitosis	GO:0031536	0.029305	2	UBE2C,CDCA5
M1	regulation of exit from mitosis	GO:0007096	0.0909036	2	UBE2C,CDCA5
M1	free ubiquitin chain polymerization	GO:0010994	0.0610297	2	UBE2C,UBE2S
M1	protein K29-linked ubiquitination	GO:0035519	0.0456581	2	UBE2T,UBE2S
M1	positive regulation of chromatin binding	GO:0035563	0.0909036	2	CDT1,GMNN
M1	DNA replication preinitiation complex assembly	GO:0071163	0.0138553	2	CDT1,GMNN
SOURCE	TARGET	WEIGHT
CARD9	TONSL	0.113288
RGS9	VWC2	0.127345
PKD1L3	PLXNB3	0.12194
PKD1L3	CNNM4	0.151395
PKD1L3	CHGA	0.1001
CCL19	PKD1L3	0.127812
C14orf93	PKD1L3	0.0870477
PKD1L3	RANBP3L	0.161746
BAIAP3	BICC1	0.144658
PKD1L3	BTN1A1	0.122768
ARMC6	TMEM266	0.126178
ARMC6	PKD1L3	0.164631
ZNF570	PKD1L3	0.156097
PKD1L3	CCR5	0.121889
POLL	UNC119	0.123197
PKD1L3	2019-03-01	0.132082
ATP8B4	PKD1L3	0.115574
ZNF713	PKD1L3	0.157772
TIGD1	VWC2	0.142049
NRIP2	PKD1L3	0.125464
CDR2L	ESM1	0.152556
PDE6H	PKD1L3	0.18823
MATN4	VWC2	0.11571
DOCK10	CARD9	0.0879254
NDST3	PKD1L3	0.118735
CDR2L	TRPM4	0.144107
MIOX	FAAP24	0.120507
PICK1	PKD1L3	0.192237
SVOPL	PKD1L3	0.112181
IMPG2	PKD1L3	0.162737
PRG4	PKD1L3	0.135229
SPP2	PKD1L3	0.153791
PKD1L3	CHST1	0.13329
SYDE2	VWC2	0.12554
VWC2	ADGRG3	0.117155
KCP	PKD1L3	0.111533
SLC30A3	CDR2L	0.162933
PKD1L3	MRM1	0.10584
PKD1L3	ZNF571	0.200405
MMP13	RANBP3L	0.0876859
GTF3C4	MIOX	0.250901
MIOX	ADGRA3	0.184113
TMEM59L	MIOX	0.107309
MIOX	CA14	0.292943
RNF168	BRSK1	0.136987
SULT4A1	MIOX	0.235065
PKD1L3	SYT16	0.194112
TNN	PKD1L3	0.131509
PKD1L3	MMP17	0.108167
TIGD1	NKAIN1	0.0982982
TIGD1	ZNF391	0.19295
ZFP2	CCNT1	0.114557
ASIC2	PKD1L3	0.165309
VWC2	USP27X	0.114103
SHANK1	PKD1L3	0.13532
WISP3	RNF168	0.163897
CACNA2D3	PKD1L3	0.168832
GPR162	TMEM266	0.0962111
CARD9	CCNT1	0.16813
CLEC5A	PKD1L3	0.148533
DZANK1	PKD1L3	0.106103
MIOX	GCGR	0.176558
CARD9	RNF168	0.165317
CSN3	APOL5	0.198176
CDR2L	FOXJ1	0.0781859
CD180	CARD9	0.0868836
BAIAP3	PKD1L3	0.171206
SMCR8	ZSWIM6	0.840836
C17orf58	EAF1	0.891141
KLF12	TET3	0.855259
MIB1	OSTM1	0.961267
PAPOLA	TSKS	0.656528
OTUD6B	MTR	0.914133
HIPK2	ATG2B	0.875883
ARFGEF2	UBQLN1	0.908539
USP25	NBEA	0.97377
SEMA5A	RICTOR	0.855097
CEP57L1	XPA	0.645375
SH3PXD2A	PCGF5	0.839298
DNAJC10	MIB1	0.871266
ZNF420	FBLIM1	0.851606
CDKN2B	YWHAG	0.832569
USP16	ZNF397	0.776337
MAPK1IP1L	ATF6	0.881452
MED23	TYSND1	0.741522
YDJC	FTSJ3	0.700293
SMAD5	PPIL4	0.846724
SMAD5	ABRAXAS1	0.592438
ARG1	SMARCAD1	0.677794
FNDC3B	MAPK8	0.826882
MTMR6	ZSCAN29	0.777828
TRMT6	ITSN2	0.88112
UBE2H	CNST	0.879399
CPEB4	RICTOR	0.95218
TMEM8A	TTPAL	0.946549
CAMTA1	RELCH	0.854084
DGKD	STK4	0.785571
SAR1B	YWHAG	0.842835
CCDC43	GLDN	0.779689
DCUN1D1	CCDC43	0.834786
PRR14L	KIF3A	0.799247
QTRT2	ZSCAN29	0.505546
TCF7L2	UBE2H	0.924911
NUFIP2	COX15	0.908504
SH3TC2	PTBP3	0.529028
C5orf24	ZBTB33	0.810151
ERCC4	TRMT12	0.636007
LIN54	SORBS1	0.597102
EP400	MIS18BP1	0.848451
PAK1	AK3	0.830096
CCNYL1	OGFRL1	0.801402
RBM45	BTBD10	0.75089
ATP8B1	ZFP82	0.631282
LEMD3	SCRN3	0.557175
NFAT5	RFXAP	0.884361
ABI2	MTR	0.89868
VPS13A	PIK3CA	0.909935
SLC30A6	MED28	0.886257
ZHX1	VEZT	0.87401
GEMIN5	FNDC3B	0.87582
TMEM245	SNAP29	0.909767
RAB21	ZNF606	0.607001
SUPT20H	DDX6	0.666938
SPIN1	DYNC1H1	0.900696
TNS4	NSUN2	0.633807
SLC44A1	XRN2	0.824758
ASRGL1	CPEB2	0.677414
BRWD3	SCOC	0.772359
AZI2	NUFIP2	0.823373
RWDD4	TOR1B	0.722068
REEP3	BAG5	0.803637
TCF7L2	DNAJC10	0.917096
KBTBD2	ZC3HAV1	0.869226
FAM210A	C16orf72	0.871355
CCSER2	ZNF24	0.912677
TMEM30A	EAF1	0.934547
FADS2	NDUFAF2	0.917335
ZFP28	UBQLN1	0.777622
OTUD1	MED28	0.64484
TMEM132A	XRN2	0.80937
LRCH2	QKI	0.75483
MIB1	MED28	0.875847
NUP58	NOP58	0.838353
METTL8	TGFBR1	0.847452
PRKX	SART3	0.375299
MIB1	ZSWIM6	0.912326
GNG2	RFTN2	0.642099
PACS1	NSD3	0.523215
AP3M1	ARL8B	0.710057
RAP2A	MMP11	0.81787
HSPA12B	NR2C2	0.813303
CNOT6L	SPOPL	0.797616
YWHAG	TMEM108	0.773703
SKA2	PCGF6	0.830543
TCF7L2	UBR3	0.827393
DCAKD	C6orf203	0.853558
CGGBP1	TMF1	0.830676
TBC1D9	FAR1	0.867738
TMEM245	PRKAB2	0.832701
CNTN1	ARMC2	0.416663
NOP58	SOX12	0.785879
CREM	NAALAD2	0.565141
USP25	NIPBL	0.829893
PRKAR2A	CCSAP	0.624201
SENP7	RBM15	0.771516
GNAQ	SMAD5	0.904004
FAM81A	LMLN	0.725175
RASA2	LRRC8A	0.832815
ANKRD13A	TTC17	0.840966
TASP1	IL17RD	0.68513
INTS2	ERCC4	0.890907
RCAN3	RPRD1B	0.819517
ZSWIM6	IFT81	0.637782
ZUP1	MRPS10	0.892155
HECTD2	DYNC1LI1	0.746491
AQP9	ERBIN	0.57786
FBXW7	GNA13	0.868955
ZC3HAV1	DYNC1LI1	0.873906
FBXO45	GALNT15	0.888318
NOP58	XRN2	0.865619
GOPC	TSR1	0.836271
HDGFL3	EIF5A2	0.9139
SKA2	SPIN1	0.8602
UBE2H	IDI1	0.850457
HOOK3	USP31	0.673997
CCDC163	LRCH2	0.263736
ANKRD28	SGMS2	0.801096
SOX12	LRRC46	0.525396
NSUN2	ZFAND4	0.67993
STAT3	CHFR	0.844998
RWDD4	SMG1	0.864307
RASA2	ESCO1	0.777812
PTAR1	GNAQ	0.661991
MYO19	IMPACT	0.833727
KLF12	MYO9A	0.752382
QKI	NUDT19	0.839191
RAB3GAP1	MEGF10	0.73459
PBRM1	LRIG2	0.419544
DELE1	SH3RF3	0.641893
C18orf25	FAM210A	0.882649
PPIL4	CHM	0.85003
BMP2K	TRAF3	0.536381
FNDC3B	TFDP2	0.836659
MYO19	RAP2A	0.867166
ANKRD52	RALGPS2	0.863873
SUPT20H	PHF14	0.857048
ABL2	ALDH18A1	0.865157
FBXO32	SQSTM1	0.780378
SLC25A13	KLF12	0.897844
PAPOLA	ERCC6	0.473619
ABTB2	FAR1	0.73704
CPEB4	C16orf72	0.86527
CAMTA1	RBM25	0.876855
KYAT3	CEP78	0.713631
PAPOLA	PRELID3B	0.683915
DOCK5	NUFIP2	0.889147
FNIP1	CNTLN	0.548054
CNOT6	HEATR5A	0.726699
SOBP	TMLHE	0.621534
DDHD1	LNPEP	0.580501
CLASP1	RASSF6	0.790894
NSUN2	PCGF6	0.950696
RTTN	RLIM	0.707398
MEX3A	BAIAP2L1	0.764012
RICTOR	NGEF	0.797172
ARHGAP42	CENPO	0.491567
DNAJC10	TPK1	0.868517
APPL1	MFSD4A	0.524985
CAMKK1	DENND4C	0.549796
CGGBP1	CNOT6L	0.864344
SLC12A9	SMIM15	0.639778
NSUN2	MFSD13A	0.49186
SEC61A1	NUS1	0.732173
TBL1XR1	RAP2A	0.842025
CLDN12	SLC26A2	0.720067
BMPR1B	UGGT1	0.762739
HEATR5B	ACAD11	0.916058
TWSG1	LUZP1	0.896305
JDP2	ZNF770	0.86246
SSR1	SLC30A5	0.843311
NONO	RBM25	0.831353
STK4	ASB6	0.523946
GFM1	UBQLN1	0.862934
MMAB	GNA13	0.536715
SMAD5	RAB23	0.855584
DYNC1LI1	NFYC	0.664751
APPL1	HECTD1	0.952047
FAM210A	PHF5A	0.839623
GNG7	RLIM	0.569045
PLEKHA3	SETD4	0.806815
SSR1	PRKAB2	0.844669
RAB3GAP1	USP42	0.524783
SESN3	TMEM65	0.640278
PRSS23	COG6	0.742696
C17orf58	G2E3	0.95891
KBTBD2	TMF1	0.851077
FBXO25	MED10	0.850922
DCUN1D1	MIS18BP1	0.843384
CREBRF	PEAK1	0.88871
JMY	RICTOR	0.826686
SLC39A10	RIPK1	0.893548
FAR1	CCDC43	0.915181
CGGBP1	C18orf25	0.82676
BTBD7	ZSCAN29	0.721302
MIB1	EXOC5	0.867278
PCYOX1	LARP6	0.842187
XPR1	COL12A1	0.897381
PCGF5	ERMP1	0.832284
CCSER2	PRIMPOL	0.815623
MTMR12	SMAD2	0.837375
TENM2	RCC2	0.553249
IMPACT	COQ4	0.729429
QKI	SORBS1	0.826777
SMIM15	VEZT	0.830654
CAMKK1	KIF3A	0.765237
NAA25	SBNO1	0.681965
FBLIM1	NLGN3	0.688115
FBXO32	KIAA1217	0.780945
TMEM63C	ZBTB44	0.635449
LARP4	LSG1	0.9636
NECAB3	YWHAG	0.663137
SMAD5	MAN2A1	0.863093
USP16	NUDCD2	0.85048
C1QTNF12	TNPO1	0.465904
GK5	ZNF532	0.501236
DNAJC10	ADAMTS5	0.860746
PPTC7	COX15	0.8434
DCTN4	TMEM168	0.883992
NMRAL1	TIAM2	0.672453
C17orf58	SLC39A10	0.859734
TMEM245	PPTC7	0.837304
CFAP36	SLC35B4	0.777495
FAM122B	ABL2	0.875774
LRCH3	NAA25	0.799687
TMEM128	ZRANB2	0.881216
ZNF644	SMAD4	0.748795
KCTD10	CEP41	0.852763
PAPOLA	TBC1D9	0.923835
SMAD5	PIK3CA	0.877231
GPIHBP1	ENOPH1	0.613902
KCTD5	XRN2	0.751808
CNTN1	EXOC8	0.639201
POLR3A	CLSPN	0.350105
PNPT1	POLR3A	0.837296
CAND1	SLC30A6	0.847862
TXLNG	VAV2	0.740309
ARHGAP5	TMEM50A	0.904432
AK3	KLHL42	0.808993
PCGF3	UGGT2	0.804986
TSR1	FAM91A1	0.639676
TMEM245	GPD2	0.841187
USP25	DCAF10	0.816429
USP25	TMTC3	0.825234
ZDHHC2	RALGPS2	0.747996
LARP1B	GRTP1	0.807439
NBEA	RAB21	0.84574
ST6GAL2	TDRP	0.678017
TMEM248	NEPRO	0.905883
STK17B	EAF1	0.801305
DELE1	MTR	0.928
EPB41L2	TMPRSS2	0.758717
DCUN1D1	NUS1	0.88485
BIRC6	TET3	0.846248
RIPOR3	CCDC43	0.803651
ZNFX1	FAM102B	0.902349
NECTIN1	BLOC1S2	0.867268
SLC44A4	GNG10	0.366987
PYGO2	ZFP30	0.379055
AIG1	FBXO45	0.785072
NES	XPR1	0.745427
CEP70	COQ5	0.766326
RICTOR	DIP2B	0.754446
SMAD5	VPS13A	0.854547
GNG2	RBM15	0.795326
CFAP97	PIK3CA	0.836609
PARG	SCRN3	0.594176
NFIX	TMF1	0.690657
TMEM263	TTYH1	0.547925
UBR3	CREBRF	0.848588
LYSMD3	EAF1	0.882709
FRS2	CNST	0.870312
SH3BP1	KLHL42	0.414625
FAM155B	SORBS1	0.332697
PGR	NAV1	0.529932
NAV1	ADAM11	0.540166
FANCM	WDR35	0.774781
GPCPD1	THNSL1	0.804555
LOXL3	NCS1	0.855369
TTPAL	PDPK1	0.600152
ARHGAP35	FNIP1	0.889481
STX17	MKKS	0.899351
COX15	BLOC1S2	0.88143
BAG5	COQ10B	0.755101
SMCR8	MYEF2	0.8289
USP38	PCGF6	0.893942
VAV2	SRSF12	0.647537
KCTD10	ZC4H2	0.659028
RBBP6	STK32B	0.468586
AK3	RHOF	0.606083
FNDC3B	FOXO3	0.893114
RAB3GAP1	CSNK1G1	0.649016
FBXO33	PHC3	0.731571
DHX37	ZRANB2	0.834512
NUP58	CDK12	0.852487
MIER3	NUS1	0.918015
PNPT1	MYO19	0.836191
CISH	CAPN5	0.648299
BMP2K	RHBDD1	0.803535
ZDHHC20	DHX36	0.572999
CNOT6L	BIRC6	0.826603
SMAD9	TNRC6C	0.295186
CCDC186	SHPRH	0.678434
CCSER2	HSPA5	0.732454
EMSY	PCGF6	0.782813
ABI2	EPM2AIP1	0.882513
TBC1D8B	PCYOX1	0.718699
GPR83	ITGA9	0.64713
SLC25A23	NUFIP2	0.749786
EIF2B1	TSR1	0.646663
NFAT5	BMT2	0.829211
FNDC1	SRRD	0.59843
CCDC18	CTTNBP2NL	0.739852
KIRREL3	ANXA6	0.622101
TMEM241	GNG2	0.527104
COQ8B	ABHD12B	0.754511
PNPT1	SSR1	0.879616
THNSL1	MGAT5B	0.516729
ABHD15	CSNK1G1	0.413553
FAM160B1	SETD5	0.759521
UBFD1	TMEM248	0.890523
GXYLT1	PPM1K	0.593035
ZSWIM6	EXOC5	0.831558
PAPOLA	DNAL1	0.94618
DSCAML1	QKI	0.418392
TSGA10	LPP	0.409007
GABPA	SSR1	0.855915
CASC4	BAG5	0.821738
TGS1	RIOK1	0.842596
SMAD5	AVL9	0.869704
EDIL3	BTNL9	0.696081
FAM135A	MTHFD1L	0.837711
PDK1	GNB4	0.863456
CLCN2	GPCPD1	0.480159
NMRAL1	FNBP1	0.823035
PALB2	WDR35	0.379774
C5orf24	HCN3	0.58886
OGFRL1	CPEB4	0.825361
ARHGAP5	CD109	0.898148
MTO1	MRPS10	0.79427
BLOC1S2	TMEM168	0.860852
CHPT1	VPS13A	0.932942
USP38	UBQLN1	0.82792
CGGBP1	PPIL4	0.862384
SYAP1	ZDHHC16	0.823253
PAPOLA	PPP2R5E	0.826244
UBQLN1	TMEM30A	0.912126
TMTC2	CHFR	0.686239
RANBP17	BLOC1S2	0.614452
FBXL19	SMAD2	0.702083
TTYH3	FAR1	0.836463
TMPRSS2	RASGRF2	0.814565
SLC39A10	FAM169A	0.293284
SEMA5A	ENOPH1	0.837981
RIPK1	ITPRIP	0.74168
EVA1C	MED10	0.818034
PRKAR2A	WDR4	0.884909
BLOC1S2	ALDH18A1	0.86933
NOP58	BIRC8	0.286095
CNOT6L	CCNJ	0.581682
TMED8	FAM118A	0.642881
CAMTA1	ZCCHC2	0.720805
DENND5B	SLC2A13	0.663471
NCBP3	UBL7	0.596837
PPIL4	SOCS4	0.394442
SLC26A2	LARP6	0.863424
SSR1	BLOC1S2	0.865537
PHF20	GNB4	0.731868
DCBLD2	ABL2	0.8319
NDUFAF2	SFXN4	0.696591
TMX3	SMARCAD1	0.90521
CDKN2B	FNDC3B	0.918313
MIB1	SPIN1	0.880829
CPSF2	NDUFAF2	0.840136
ARFGEF2	PANX2	0.656796
CAMTA1	YWHAG	0.919579
SMAD2	WDR35	0.827388
DNAJC10	THBS1	0.841407
SMAD2	VEZT	0.906661
SEC22A	HEATR5A	0.528891
INTS6L	CYYR1	0.613403
SAMD8	CEP97	0.663832
PPP4R3B	ZDHHC16	0.910302
FBXO30	XPA	0.680501
SAMD8	MIB1	0.815403
GPATCH2L	CPEB2	0.877984
DNAJC10	CACNA1C	0.850945
DAGLB	ATG16L1	0.751261
MFSD8	ZSCAN16	0.50798
YWHAG	USP22	0.899952
AGO1	COX15	0.855063
USHBP1	SFXN4	0.3947
KCNIP4	ASNS	0.451546
SMAD5	QKI	0.92132
SMAD5	TMEM30A	0.864679
RAB8B	ZSWIM6	0.926416
ARFGEF2	DHX36	0.878812
RDH11	PREP	0.864479
SLC30A7	FNDC1	0.833448
OSTM1	LARP6	0.863064
GOPC	CSNK1G3	0.674614
USP16	NUS1	0.896795
GOPC	BLOC1S6	0.866104
NOD1	2019-03-09	0.782585
KIZ	SMAD4	0.648237
UGGT1	TSPAN11	0.280336
CD109	PCGF3	0.879477
BEND6	LARP6	0.844577
SLC30A5	PIGG	0.551619
RAB10	SPAG16	0.876658
MCU	AK3	0.792941
ARV1	ZNF771	0.689946
CAMTA1	NUP58	0.897737
GLS	SKA2	0.8575
RAP2A	UBE2H	0.894453
RASA2	UHMK1	0.85323
PARP11	TMEM30A	0.68435
QKI	SLC44A1	0.880277
TBC1D32	CATSPERG	0.588594
SPAG9	SH3RF1	0.915098
RPP14	SLC26A2	0.876175
VEZT	KCTD9	0.886914
TMTC3	PCGF6	0.826371
SNX18	ZSCAN29	0.882908
PAPOLA	AVL9	0.827772
LYSMD2	SLC22A17	0.385758
APPL1	C16orf72	0.930944
SAMD9L	ADAMTS5	0.750204
TCF7L2	ARL8B	0.834327
NSUN2	NUS1	0.837881
RASSF8	RNF145	0.744238
CHPT1	EML4	0.846613
MINDY1	LTBP4	0.667642
TMEM132A	OLFM2	0.453474
GOPC	STT3B	0.593366
TMX3	FNDC3B	0.848141
KIAA1549	DHX36	0.866909
NUFIP2	ZNF268	0.49884
PDS5B	VPS13A	0.783777
INCENP	COG6	0.27907
GLS	SART3	0.884118
NDUFAF7	NAA25	0.914801
GEMIN5	TMEM245	0.834908
HSPB7	LTBP4	0.630834
SPIN1	SUDS3	0.817743
FOXP4	EML4	0.577015
FAM98A	TENM3	0.583114
NLK	DNAJC18	0.634812
NUS1	OSBPL10	0.814897
ADAMTS6	ZC3HAV1L	0.734054
DELE1	FBXO25	0.866196
UBR3	SNX18	0.84187
QKI	SLC1A7	0.644778
ARHGEF19	PIGG	0.54972
TCF7L2	ANKIB1	0.72445
CGGBP1	ARL8B	0.885251
RAB10	MRPS10	0.834209
YWHAG	TMEM50A	0.850375
NIPAL4	FNDC1	0.6932
ZZZ3	CCDC142	0.565614
SEPSECS	TTBK2	0.810254
AASDH	RFX2	0.785314
ZNF12	CADM4	0.769162
POLR3A	NAV1	0.885276
ZC3HAV1	EVI5L	0.68431
BMT2	ANKRD37	0.475624
BLOC1S2	VEZT	0.871259
SLC39A10	CENPO	0.779553
PAPOLA	MAPK1IP1L	0.867489
SPIN1	FBXO27	0.594647
PKN2	RAB3GAP1	0.899616
TET3	MAATS1	0.710547
NECTIN1	FAM221A	0.641858
AMDHD1	TAOK1	0.509208
DSTYK	NFAT5	0.871184
RCOR2	IREB2	0.60318
SYAP1	C6orf89	0.739957
LHX6	NOL4L	0.754423
KLF12	RRN3	0.398677
PAPOLA	ZC3HAV1	0.913211
PLEKHA3	ZSWIM1	0.593101
FAM69B	NCKIPSD	0.619148
LSM10	NCKAP5	0.608289
SSR1	C16orf72	0.919247
MYSM1	CNTNAP5	0.354496
DNAJC10	ATP11C	0.930272
USP35	GJC1	0.748364
UGT8	SPOPL	0.747184
ROCK1	USP16	0.863977
CIART	NAV1	0.637912
TMEM8A	LPP	0.864386
NCDN	ADGRL3	0.615052
KIF3A	KLHDC10	0.812751
PRDM5	TMEM181	0.352425
TMF1	IQSEC2	0.718354
CLPB	MED10	0.662824
G2E3	PRPF4B	0.862529
2019-09-03	PRKAB2	0.757279
VPS13B	RBM25	0.83299
RAB10	USP53	0.853734
MIER3	FAM222B	0.822853
RAP2A	KLHL23	0.874895
BMPR2	TMEM245	0.846225
MIER3	WDR48	0.626531
TMTC3	AP1S2	0.855017
TULP4	RNF144B	0.657484
ALDH18A1	ZDHHC16	0.909877
PHF20L1	MTR	0.900822
TMEM189	UBQLN1	0.843939
PIWIL4	MMAA	0.709843
TWSG1	SHPRH	0.813665
DCAF10	ZNF398	0.723645
ZNF699	NOP58	0.201726
NUP58	RBBP6	0.917582
DCP1A	KLHL15	0.890217
LPCAT2	TMEM65	0.841178
ZNF664	MED10	0.697429
USP25	KLHL24	0.908803
PDK4	KMT2C	0.800989
RBM25	DBT	0.882905
SLC35G1	GNG7	0.544873
CCSER2	FOXK2	0.850317
SLC26A2	ODF2	0.824714
GNAQ	MATN3	0.394237
ARMH4	IGSF11	0.467772
SKA2	ZC3HAV1	0.833329
SLC35A3	ASXL2	0.775196
TMEM199	CAND1	0.839413
ASB1	KIF3A	0.74364
WHAMM	EAF1	0.736632
BMPR2	RFLNA	0.824908
CAND1	COL11A2	0.469148
RELCH	DYNC1LI1	0.919104
SNAP29	NUS1	0.882905
FLYWCH2	METTL16	0.446012
FBXO32	ZNF70	0.334474
PRKAR2A	BBX	0.837267
CPEB4	RSF1	0.676273
SLC30A7	TMEM181	0.618168
LNPK	DPY19L4	0.872079
ZC3HAV1L	ZSWIM6	0.805885
C17orf58	PSMD10	0.719125
METTL16	FITM2	0.376638
ZNFX1	SDAD1	0.801329
PIGN	XPR1	0.807892
NUS1	SLC30A9	0.864131
TICRR	ZDHHC16	0.562695
MAPK1IP1L	JDP2	0.87577
SCOC	BLOC1S6	0.869798
RTTN	FBXO11	0.745074
DENND4C	TEX14	0.338248
USP25	QKI	0.888296
UBQLN1	NIN	0.718786
SSR1	MTR	0.912048
CCSER2	PYGO2	0.791796
TMTC3	PCYOX1	0.876168
SSBP3	TEAD2	0.829643
STYX	NUS1	0.733124
HEATR5A	IDI1	0.830384
AGPS	KMT2C	0.857422
RPGRIP1L	PDP2	0.499329
VPS13C	TSEN54	0.791534
BMPR2	MMD	0.766834
CHADL	LDLRAD3	0.276059
UTP6	TBC1D32	0.809097
SNX18	UPF3B	0.735437
ANXA6	PCGF5	0.824775
MCU	MYLK3	0.508491
TMEM65	TTC14	0.826624
CPEB4	FNDC3B	0.84697
KLF12	TDRP	0.801344
DDHD1	ZRANB2	0.840713
DOCK5	ALDH1L2	0.573059
C17orf58	MED28	0.825044
UBE2Z	SELENOI	0.819573
SMAD5	MRPS10	0.835538
UEVLD	RGS6	0.595618
NOP58	FAM210A	0.905084
NCDN	CBL	0.898714
ZNF462	SELENOI	0.670386
FBXO10	CILP2	0.239472
CALHM6	RCC2	0.644491
CD109	DCAF6	0.754474
DCBLD2	IGSF11	0.575372
USP16	TFDP2	0.86915
DCBLD2	LPP	0.937274
TMEM263	CTTNBP2NL	0.801145
DNAJB14	TMEM30A	0.936816
PAPOLA	OSBPL8	0.792007
FAM160B1	SLC35C2	0.835057
DCBLD2	OSTM1	0.844842
AVL9	GPCPD1	0.840541
KLHL24	GNA13	0.931787
GJC1	RALGPS1	0.730152
2019-09-03	GPR155	0.598444
C18orf25	FAM131C	0.485889
SLC35A3	PCGF5	0.844429
AASDH	RBSN	0.792168
UBFD1	FBXL17	0.506652
NUP58	MIB1	0.88019
NOC4L	FAM210A	0.399372
TIMD4	ZNF770	0.351276
ATF7IP	TMEM30A	0.851108
PAPOLA	GNA13	0.962731
PNPT1	PCGF6	0.898045
NOP58	OTUD6B	0.848019
SLC26A2	TEAD2	0.839401
TRMT6	MCM8	0.832011
PAPOLA	KPNA5	0.569741
MIB1	RASA2	0.830164
RAPH1	SH3PXD2A	0.761228
ZRANB1	SPIN1	0.918656
MARS2	FAM208B	0.730128
GABPA	SGTB	0.798918
EBF3	NFAT5	0.776935
NUS1	FAM208B	0.845057
THAP5	SMIM15	0.628333
BCDIN3D	POLR1B	0.487307
SMCR8	SPIN1	0.901794
C18orf25	AFF4	0.900565
DCUN1D1	ZBTB38	0.869912
KCTD15	ZBTB10	0.801329
SPAG9	MTR	0.893939
PAPOLA	SERPINE2	0.864328
GNPTAB	SMG1	0.664881
CCDC115	ODF2	0.828519
LPCAT2	CCDC93	0.737135
SERPINE2	PRSS23	0.892155
BCLAF1	SORCS2	0.651369
IL1RL1	AREL1	0.804065
JMY	TMEM120B	0.349736
TET3	ZDHHC16	0.864461
MIEF1	MED28	0.885665
CGGBP1	GTF3C3	0.824643
SPRYD3	GNG10	0.776305
SPAG9	CPEB4	0.924028
TMEM248	XRN2	0.899296
PDZD8	PIK3CA	0.770395
RGS6	GTF2A1	0.843029
PPP4R3B	PDXP	0.858188
CS	YWHAG	0.580003
PPIL4	ZUP1	0.879965
TCP11	DYNC1LI2	0.326573
SLF2	MAPK8	0.777538
TGS1	DHX36	0.895205
CD3EAP	UTP15	0.38497
FAM160B1	TEFM	0.725457
FAM160B1	RSC1A1	0.901942
SUPT20H	SLC35A3	0.946112
SLC41A2	OSTM1	0.686725
GLS	TMTC3	0.897967
BMPR2	PIK3CA	0.851232
RAB33B	SMIM15	0.269158
TMEM248	CLEC4E	0.707386
RPP14	NACC2	0.653155
ATE1	NCDN	0.831763
ARHGAP21	PRKD3	0.85352
EEPD1	NEPRO	0.82646
RFXAP	RPGRIP1L	0.870978
PBRM1	OGFRL1	0.797024
AFF4	LMBRD2	0.634218
CLEC7A	SMARCAD1	0.499489
MPP5	RICTOR	0.856475
ARL8B	FTSJ3	0.761455
CPSF2	NXPE3	0.58082
VPS13B	USP34	0.860138
CD109	MRPS10	0.835593
INTS2	MBTD1	0.783487
CNOT6L	CBL	0.892995
UBE3C	MAPK1IP1L	0.964167
NR2C2	GNB4	0.942245
NUP58	SPIN1	0.870821
SLC35A3	RAB21	0.831627
ABRACL	TNPO1	0.829561
SNX18	TET2	0.71849
RCAN3	CPEB2	0.871714
PTK2	SEMA7A	0.435054
CNOT6L	DPP8	0.68215
NAP1L4	TMEM163	0.728839
DCTN4	EXOC5	0.86615
C18orf25	CPEB4	0.874165
ATP6V0A2	HDGFL3	0.817661
ANKRD28	PCGF5	0.852341
RAP2A	ZNF311	0.585494
ROCK1	GDA	0.775414
PITRM1	NAV1	0.607001
PHF20L1	ICA1L	0.519879
ZNF700	ANXA6	0.587559
ARHGAP35	B3GNT2	0.584397
GPRIN1	YPEL2	0.594397
CCNYL1	AKT1S1	0.775759
POMGNT1	POLR3A	0.710233
SCOC	RGS6	0.86378
ELAVL1	UBQLN1	0.84934
LYSMD2	ITIH4	0.858633
ARHGAP5	QKI	0.825497
ZNF322	RFXAP	0.849242
PAPOLA	PLEKHA8	0.462686
ZNF318	DBT	0.738286
RAB10	FAM114A2	0.904711
NUP43	C17orf58	0.754186
BMPR2	SHISA2	0.64706
SLC30A7	OLA1	0.690872
PRKAR2A	C17orf58	0.842337
SEMA5A	CAB39L	0.860541
C20orf194	PIK3CA	0.685035
SNX18	ZKSCAN2	0.676233
NFE2L3	SLC30A7	0.84794
BDP1	MRPS10	0.833354
GNA13	VEZT	0.847562
ISCA2	VEZT	0.836057
EP400	RBP7	0.667283
KCTD10	RAB23	0.853604
FAM122B	ERBIN	0.840897
LARP4	NONO	0.916112
FAR1	THBS1	0.890425
XRN2	CDKAL1	0.601572
PAPOLA	HIPK2	0.91277
CDK12	NUS1	0.847495
AGPS	ARHGAP5	0.837608
PLEKHG2	CHFR	0.771951
NUS1	EXOC5	0.930462
GNL3	CFAP97	0.849133
PIGN	ANO8	0.580449
RAB10	CBLN3	0.484731
GPCPD1	DHX36	0.892963
FAM160B1	SCLT1	0.732287
CGGBP1	TNPO1	0.832343
CAND1	DNAH1	0.66958
LYSMD2	DOCK4	0.820263
HMBOX1	MED28	0.478978
HUWE1	SLC30A4	0.749534
RDH11	NAP1L4	0.891896
ZNF10	AKT1S1	0.668853
ASNS	CADM4	0.879176
NUS1	TSPAN18	0.73601
RHOU	NLK	0.737601
UBFD1	WDFY1	0.906534
ZUP1	DHX36	0.908876
GPC2	IDI1	0.69643
SH3PXD2B	ADAMTS12	0.814023
FAM210B	OSBPL11	0.792103
THAP9	STARD7	0.642061
SMAD5	NFAT5	0.958573
RBM11	MIGA1	0.454162
NT5C3B	SLX4	0.658956
TNPO1	YOD1	0.844509
PAK1	POLH	0.763743
RAB10	EIF4G2	0.872409
CPEB4	SSH2	0.840484
IL17RD	DEPDC7	0.689221
LPCAT2	FBXW7	0.921123
KIRREL1	MIB1	0.562244
GPCPD1	FOXO3	0.847483
LRP6	TFDP2	0.843658
ZRANB1	RICTOR	0.863812
HAUS6	UTP6	0.870112
LYSMD2	PCGF5	0.963121
COG3	TMEM30A	0.672957
SUPT20H	DYNC1LI1	0.886951
ZFC3H1	ARFGEF2	0.855945
CNOT6L	STK4	0.832156
ZNF664	FUT11	0.433787
DOCK5	CPEB4	0.878555
DDHD1	MTR	0.829738
MIGA1	PROCA1	0.391195
HEATR5B	CLEC3A	0.677207
DSTYK	CFAP36	0.782605
TMEM131L	CCDC117	0.633354
ANKRD13A	MED10	0.935685
NAA15	YWHAG	0.727843
ARFGEF2	LLGL1	0.851185
PCGF5	GALNT15	0.916484
PRLR	XG	0.431378
ZHX1	PHKA1	0.856865
SLC36A4	NCKIPSD	0.729255
FAM210A	COQ5	0.885539
PRSS23	THBS1	0.939673
RELCH	TWSG1	0.869472
NAP1L4	RAB21	0.859859
NFXL1	BMT2	0.838915
YPEL2	UGGT1	0.766512
ZBTB41	ERCC4	0.840488
SERPINE2	EGLN3	0.798595
TMEM248	ALDH18A1	0.849695
TULP4	BLOC1S6	0.833138
TMF1	RASA2	0.921293
RBM25	MIB1	0.872673
GLS	EDIL3	0.886792
TBL1XR1	LONRF3	0.415203
TMF1	KYAT3	0.929718
ZDHHC21	KLHL42	0.636099
C17orf58	SASS6	0.577897
ANKRD13C	RAB21	0.811031
RAB10	TMEM19	0.881216
SPEG	TMEM33	0.815347
PPTC7	GJC1	0.899965
APPL1	XRN2	0.837304
SLC2A13	CTTNBP2NL	0.666253
ARFGEF2	RCC2	0.941513
SPAG9	BMPR2	0.866969
FAM122B	PPIL4	0.892753
ZNF654	SLC35A3	0.889117
SNX18	SMG1	0.84628
CPEB4	ZSWIM6	0.823395
ZNF280B	PIP4P1	0.726316
RASA2	METTL16	0.766845
VEZT	EAF1	0.84914
SLC35A3	ERMP1	0.893429
SNX18	FBXO30	0.822519
BBX	DNAJC10	0.829047
FAM114A2	RIC1	0.816118
ANKRD28	CPT1C	0.823834
SLC30A7	SH3PXD2A	0.938753
KCTD10	SLC39A10	0.879681
XPO1	GNAQ	0.824334
GPCPD1	ARL8B	0.927722
QKI	PPTC7	0.839841
NCDN	HSD11B1L	0.727891
RAB10	C2orf40	0.700991
TMEM168	BLOC1S6	0.883088
CCDC88A	BDP1	0.797626
SCAI	STARD7	0.896257
TCF7L2	CCSER2	0.955957
NBEA	CAPN5	0.866546
QSOX1	ZC3H12C	0.906389
TMED8	BTBD10	0.913559
HELB	KIAA1217	0.295656
UBE2H	ZNF24	0.851378
RAB8B	TMED8	0.881117
GPATCH2L	LCA5	0.733058
RAB21	VPS13A	0.930437
LCORL	ZBTB44	0.82577
METTL8	GNB4	0.824254
NSUN2	EXOC5	0.826414
CGGBP1	MAN2A1	0.869233
NDUFAF5	NAA25	0.712232
XRRA1	LARP6	0.583967
UBR3	TMTC3	0.870614
ZNF420	ZSCAN29	0.877017
NONO	MUM1L1	0.781242
NCDN	KDM4C	0.721136
AK3	RASAL2	0.744784
PAK1	SLC44A1	0.835588
TAOK1	TMEM33	0.755868
PNPT1	RAB21	0.891159
QKI	WDFY3	0.685469
G2E3	TMEM128	0.874724
PRKAR2A	ESCO2	0.667798
EEPD1	RSAD2	0.680016
TRMT6	JHY	0.269536
PLEKHA3	ZNF74	0.700703
ARHGAP5	THBS1	0.927784
PAPOLA	AAK1	0.769302
ZNF326	ATG2B	0.875448
CCDC115	MED10	0.847617
RAB3GAP2	ZNF532	0.539855
NT5C3B	TMEM245	0.937083
UBE2Z	VPS13C	0.860827
RBM25	SETDB2	0.870831
TMED8	ZRANB2	0.861651
PAPOLA	FZD4	0.895011
OTUD6B	VEZT	0.855017
OTUD6B	FAM210A	0.831468
C17orf58	NIPBL	0.836667
HUWE1	IMPACT	0.842061
LRIG3	CLCN5	0.771085
SUPT20H	PDE4D	0.894355
TWSG1	NTMT1	0.814588
SETD7	KIF26B	0.309992
CAMTA1	MRPS10	0.8785
MYO19	MED28	0.918024
PARP8	ZDHHC6	0.696688
KLF12	PIK3CA	0.859439
NOP58	FAM122B	0.948854
SPAG9	UBQLN1	0.870676
PNPT1	TRMT6	0.938964
SH3PXD2A	SLC44A1	0.826686
GLB1L	SGO1	0.315795
DENND6A	COL6A5	0.24627
CCSER2	MTR	0.854722
RALGPS2	ARMCX4	0.737471
AP1AR	FOXO3	0.549694
MEI1	TMEM87B	0.75766
TMEM263	SLC4A11	0.851185
ARHGAP21	EIF5A2	0.905283
TMTC3	MTR	0.859877
CYYR1	ATF7IP	0.706943
REEP3	TTC7B	0.548912
ANKRD28	TM4SF18	0.721038
QKI	CPEB3	0.664724
LSG1	ZNF518B	0.780579
SPTY2D1	RAPH1	0.55545
BMT2	VEZT	0.928955
DELE1	SOWAHC	0.763522
NUP58	LSG1	0.841276
SLC36A4	TTC13	0.672002
ARFGEF2	PPM1J	0.586915
FERMT1	RNF38	0.900849
PLEKHA3	MAPK1IP1L	0.899798
CGGBP1	ACTR5	0.435294
FAM210A	TSR1	0.859818
AGO1	ZDHHC16	0.830723
BMPR2	NBEA	0.849265
NOP58	IREB2	0.914711
ZZZ3	RTTN	0.798614
KLF12	BLOC1S6	0.870779
FAM161A	RIPK1	0.691914
SNAP29	TMX3	0.896501
RELCH	TMEM65	0.842008
CNOT6L	ATG2B	0.833303
RFXAP	GPAM	0.743121
ZNF629	GRTP1	0.542401
ASB8	LRRCC1	0.748128
TBC1D8B	RAB43	0.694329
ANAPC7	MRPS10	0.694186
TMEM168	SCOC	0.867759
RAB10	VPS13A	0.886562
IQGAP3	ATF7IP	0.639947
FAM160B1	ETNK1	0.835875
SETD7	YIPF4	0.584249
PPHLN1	ANO1	0.617379
RSC1A1	PCGF6	0.860677
LRP6	SSR1	0.933106
ZNF800	TMEM87B	0.69005
RAP2A	PDE5A	0.792243
PAPOLA	WDPCP	0.437979
RIC1	TMEM61	0.665686
FAM122B	RFXAP	0.885987
RAB23	RCC2	0.86686
TMX3	EAF1	0.837159
NOP58	MAPK1	0.87669
BAG5	ARL15	0.395696
EIF5A2	DSEL	0.875285
ANO5	SGO1	0.736566
ATP8B1	TMED10	0.744917
TWSG1	CTHRC1	0.81856
C17orf58	FAM122B	0.935396
ARID1B	UBL7	0.752519
CASP2	RCC2	0.866331
RWDD4	PCGF6	0.852771
SENP6	TMF1	0.725022
LYSMD2	PCGF6	0.879163
RAB10	AEN	0.32342
ERCC4	SLC25A26	0.750073
TMF1	TMEM248	0.928617
P4HA3	MTMR6	0.678214
LRP6	QKI	0.959129
TMEM245	KALRN	0.724173
SKA2	COQ5	0.832186
ABL2	PPP2R5E	0.867951
BTBD19	FAM114A2	0.287915
FAM126A	CDC42SE2	0.79435
ANKRD28	TMF1	0.881414
MED10	TNRC6B	0.842365
LLGL1	ADCY4	0.584709
ABL2	TANC1	0.835001
HERC2	KCNMB4	0.84971
TMED8	TNKS2	0.566453
UBE2H	MED28	0.871321
LSM10	TFDP2	0.821957
LYSMD2	RIMKLA	0.854919
TMF1	TTC14	0.836221
SKA2	HINT2	0.817192
SLC25A42	NAXE	0.746081
C17orf58	SSR1	0.83466
CGGBP1	DYNC1LI1	0.868851
SLC9A5	BTNL9	0.629362
SKA2	SMIM15	0.862174
SMG1	PAPOLG	0.826182
ITSN2	PIK3AP1	0.805199
TMX3	MAPK1IP1L	0.855255
CCNYL1	KCTD3	0.441876
AADAT	NUS1	0.438071
HEATR5B	MED13	0.789325
KIAA1755	ANKRD13C	0.524174
PRLR	ZNF24	0.880132
LRP6	AGO3	0.837906
BCLAF1	TRAM1L1	0.462101
CAMTA1	UBQLN1	0.944539
MBD5	TMEM248	0.754853
WDR35	NBEA	0.856752
PBRM1	DCBLD1	0.536685
MED13L	RALGPS2	0.908889
OGFRL1	NEK9	0.886595
CCDC6	KBTBD2	0.861789
LPP	KMT2C	0.826095
BCLAF1	TSR1	0.801465
MGA	MAPK1	0.774162
NFAT5	XRN2	0.830491
PHF8	CADM4	0.765665
RDH11	CMTM8	0.798516
PTPRA	SMG1	0.676733
SPRYD3	REEP6	0.664289
POLR3A	ANXA6	0.955823
KLHL5	RHBDD1	0.790222
FGD6	QKI	0.820788
CAND1	MMS22L	0.300974
IL1RL1	ATXN2	0.572924
APPL1	TMF1	0.882
CERS6	RASGRF2	0.750547
IGDCC4	GNG2	0.613461
UBE2H	CHFR	0.882899
TRNT1	TTC14	0.879062
RNF145	TMEM248	0.82994
TYW5	ACTR1A	0.571834
FOXN2	DSEL	0.809606
SMCR8	MSL2	0.308848
C16orf72	MIGA1	0.858281
NAA15	ZNF175	0.626703
NOP58	SMG1	0.917534
MFSD8	C1GALT1C1	0.835316
DCP1A	SLMAP	0.959136
WNK3	SLC30A4	0.552076
NOP58	ABL2	0.888584
POLR1B	OSTM1	0.77897
LARP1B	PWWP2A	0.839298
C18orf25	HINT3	0.730909
AFF4	ZSWIM6	0.881742
NOSTRIN	COX15	0.641114
TNRC6C	NBEA	0.869877
PPIL4	TMEM128	0.918176
C17orf58	TMEM248	0.909619
AP1S2	MIB1	0.928037
HECW2	C6orf203	0.643763
KLHL24	USP31	0.87233
TMF1	GPCPD1	0.964024
LARP1B	ZNF316	0.205133
CHFR	LPP	0.855002
C18orf25	USP6NL	0.941795
ATP8B1	G2E3	0.822461
WDR11	USP45	0.724876
STARD4	ETNK1	0.810947
IL18R1	INTS2	0.577965
YWHAG	LRRC58	0.822715
USP38	PSAT1	0.841191
NAV1	ZC3HAV1	0.930272
VMO1	ANKRD44	0.623352
FGGY	NTMT1	0.691842
SBK1	DOCK5	0.582395
ARFGEF2	ABHD10	0.934655
DOCK1	RAP2A	0.658315
RNF145	VEZT	0.872395
LYSMD1	SYAP1	0.678627
SERPINE2	THBS1	0.869538
PHF6	ANXA6	0.677927
FBXO10	EDIL3	0.677264
UBR3	XRN2	0.888611
EIF4G2	CNST	0.894011
PCGF5	SCML1	0.858088
PNPT1	ZMYND19	0.814722
SKA2	CCDC115	0.825154
ZBTB47	B3GLCT	0.623871
AGPS	ARL5B	0.692772
UBQLN1	LRFN4	0.555066
PRSS23	RNF38	0.905597
NONO	THBS1	0.850907
AVL9	TMEM248	0.908478
DPH5	FASTKD1	0.633885
MIER3	PPP6R3	0.820595
KLF12	ARL6IP6	0.850628
GNA13	ZRANB2	0.884158
PPHLN1	ANKRD28	0.871571
TXNDC5	DYNC1LI2	0.686206
TMEM169	ZBTB33	0.598019
FAM122B	FNDC3B	0.840717
IREB2	NR2C2	0.850775
ATXN7L3	CFAP97	0.896981
GFM1	NOP58	0.8354
MDM4	GPD2	0.904437
PRKAR2A	FAM160B1	0.870188
NOP58	EPHA7	0.39431
HOOK1	ARL6IP6	0.897819
HERC2	TBX1	0.801261
ZC3HAV1	ALDH18A1	0.932367
DNMT3A	ADO	0.689926
PCNX1	LPP	0.858352
PAPOLA	NAP1L4	0.951438
TMX3	FOXA1	0.779259
TMTC3	ZHX1	0.835572
MOB1A	ANXA6	0.751027
CPSF2	MRPS10	0.890589
USP49	TTBK2	0.607867
BMPR2	RAB3GAP1	0.902687
FLRT2	DOCK5	0.838113
ARHGAP12	ROCK1	0.781471
SNX18	GXYLT1	0.824601
UGGT1	MAPK1	0.914903
ARFGEF2	C17orf58	0.878692
BBX	CDK12	0.850465
AASDH	NAPEPLD	0.81197
RIMBP2	ADCY5	0.463236
KCTD10	IQCJ-SCHIP1	0.100072
TNRC6C	ATG16L1	0.80892
KBTBD12	ZC3H12C	0.348853
CAMTA1	CASK	0.79285
USP25	DOCK5	0.860637
CAMTA1	DELE1	0.832582
C18orf25	MAPK1IP1L	0.850496
IL17RD	RNF38	0.810863
PINX1	ODF2	0.64669
TRIM7	TNRC6B	0.607423
[truncated: 3,341 more rows]

## Sheet: (B) Tumor PEP GO
Supplemental Table 3: Network-based enrichment of GO processes in the normal-carcinoma CMT comparison (A) and for each PEP (B, C).
GO_VERSION	releases/2018-05-14
NETWORK_NAME	mammary epithelium
NETWORK_VERSION	dd4974d1f0dc5bb5b8b11b6c657f4cd6c1a65d28
CLUSTER_NAME	CLUSTER_GENES
M1	NCAPG,TPX2,EXO1,CENPE,KIF11,MKI67,NCAPG2,CDC6,NCAPD3,SMC2,BRCA1,KNTC1,SHCBP1,PRC1,ANLN,SGO2,CKAP2L,MCM10,KIF15,HMMR,DEPDC1,NUP155,CENPJ,CDCA2,PARP2,KNL1,GEN1,ZNF367,TOP2A,MASTL,MPHOSPH9,CENPH,C18orf54,STIL,KIF14,ORC6,GPSM2,TK1,ASF1B,CDCA5,ENO1,PPAT,CENPL,ZWILCH,CKAP2,DSN1,RBBP8,PLOD2,ACAT2,TRIM59,DCK,FANCM,ADCY3,SHMT2,RNGTT,MYBL1,COL5A2,THBS1,SACS,PLXDC1,DCLK1,PTGER4,ABCC4,BYSL,TFRC,PIK3IP1,ARID5…
M2	SLCO2A1,ADK,DEPP1,RRAD,NECTIN3,ROR1,WWTR1,NUPR1,HLTF,SOCS5,FKTN,RBP4,RELN,FLNC,LPAR1,RUNX1T1,HSPA4L,CD34,FN1,CHSY1,CXCL12,KDELR3,AXL,KDM5B,CAT,CD99,NFKBIA,SH3BP5,BMP4,IDE,TRIB2,PANX1,CDKN1B,NF1,ATF2,ANGPTL2,ETV1,DAG1,NAB1,MPPE1,PALM,MID1,LTBP2,SRI,CALM1,PSEN1,MEF2A,ST3GAL4,NRIP1,SLC16A1,KLF4,KCTD12,TAGLN2,CPT1A,SFRP1,PSMB9,GATA2,ENPP4,ITPR1,IGFBP5,TMOD1,AHNAK,CDS1,HMGCR,LDLR,HSPA13,CSGALNACT1,CLI…
M3	C14orf93,MMP17,SHANK1,CSN1S1,BTN1A1,ZFP2,LALBA,APOL5,TMEM179B,KIF24,MYH7,PANK3,ERO1B,ESM1,DOCK10,C5AR2,CHRDL1,TPPP3,SLC35F1,GLDC,PLEKHA4,GPATCH3,MYLK3,CSN3,HUNK,TSKS,SYNE3,REEP2,DGKE,TNN,SLC9A7,ZNF571,ANAPC2,PYGM,APBB1,PDE1B,XPNPEP2,FOXJ1,CHST1,DLX5,CSN2,NRIP2,LSP1,SPP2,PLA1A,SCN4A,LIN54,ENO3,TIGD1,CYP7B1,SLC27A3,CBFA2T3,ARMH4,RFTN2,SH2D3C,ITIH3,NAXD,FBXL14,CMA1,CLEC5A,KLHL3,SEMA4G,FAM169A,SOX17,…
M4	KLHL5,BANP,ZNF654,CNOT6,SNX18,NUFIP2,ABRAXAS1,ARHGAP21,FNIP1,AFF4,C16orf72,ARHGAP5,APPL1,FAM160B1,SECISBP2,ZSWIM6,TMTC3,USP31,CNOT6L,TBRG1,CCDC186,EMSY,ITCH,NAA25,SMG1,MGA,RAD52,RASA2,BMF,RASGRF2,REEP3,C5orf24,AASDH,IRF2BP2,KLHL24,DSTYK,GOPC,C6orf136,TBL1XR1,ZNF644,DCP1A,ZBTB33,GNAQ,TGFBR1,HOXD8,MIB1,CPSF2,AFAP1L1,CGNL1,CPEB2,LRRC58,UHMK1,EBF3,CPEB4,ATP6V0A2,TMX3,ZC3H12C,SLC26A2,TMED8,ERBIN,SHE,S…
CLUSTER_NAME	TERM_NAME	GO_ID	TERM_Q_VALUE	GENE_COUNT	TERM_GENES
M1	organelle fission	GO:0048285	2.83e-09	15	MKI67,SMC2,FANCM,CENPE,KIF14,CDCA5,NCAPD3,GEN1,FIS1,TNKS,KIF2A,CDC6,NCAPG,KIF11,TPX2
M1	nuclear division	GO:0000280	2.83e-09	14	MKI67,SMC2,FANCM,CENPE,KIF14,CDCA5,NCAPD3,GEN1,TNKS,KIF2A,CDC6,NCAPG,KIF11,TPX2
M1	chromosome segregation	GO:0007059	2.83e-09	14	BRCA1,MKI67,SMC2,FANCM,CENPE,KIF14,CDCA5,NCAPD3,GEN1,TOP2A,TNKS,NCAPG,KNL1,CDC6
M1	mitotic nuclear division	GO:0140014	2.08e-08	13	MKI67,SMC2,CENPE,KIF14,CDCA5,NCAPD3,GEN1,TNKS,KIF2A,CDC6,NCAPG,KIF11,TPX2
M1	nuclear chromosome segregation	GO:0098813	5.06e-07	11	SMC2,FANCM,CENPE,KIF14,CDCA5,NCAPD3,GEN1,TNKS,NCAPG,KNL1,CDC6
M1	mitotic sister chromatid segregation	GO:0000070	6.5e-06	9	SMC2,CENPE,KIF14,CDCA5,NCAPD3,GEN1,TNKS,NCAPG,CDC6
M1	chromosome condensation	GO:0030261	1.3e-05	5	SMC2,CDCA5,NCAPD3,TOP2A,NCAPG
M1	sister chromatid segregation	GO:0000819	1.79e-05	9	SMC2,CENPE,KIF14,CDCA5,NCAPD3,GEN1,TNKS,NCAPG,CDC6
M1	mitotic chromosome condensation	GO:0007076	9.54e-05	4	SMC2,CDCA5,NCAPD3,NCAPG
M1	regulation of mitotic cell cycle	GO:0007346	9.71e-05	11	MKI67,CENPE,KNTC1,KIF14,CDCA5,GPSM2,GEN1,ZWILCH,TNKS,KIF11,CDC6
M1	regulation of mitotic nuclear division	GO:0007088	0.000227116	7	MKI67,CENPE,CDCA5,GEN1,TNKS,KIF11,CDC6
M1	regulation of nuclear division	GO:0051783	0.000249849	7	MKI67,CENPE,CDCA5,GEN1,TNKS,KIF11,CDC6
M1	DNA packaging	GO:0006323	0.000249849	6	SMC2,CDCA5,ASF1B,NCAPD3,TOP2A,NCAPG
M1	regulation of chromosome segregation	GO:0051983	0.00037306	6	MKI67,CENPE,CDCA5,GEN1,TNKS,CDC6
M1	cell cycle phase transition	GO:0044770	0.000550843	9	BRCA1,MASTL,CENPE,KIF14,CDCA5,CDC14B,GEN1,TAF2,CDC6
M1	mitotic spindle organization	GO:0007052	0.000618027	6	CENPE,GPSM2,KIF2A,KIF11,STIL,TPX2
M1	regulation of sister chromatid segregation	GO:0033045	0.000955839	5	CENPE,CDCA5,GEN1,TNKS,CDC6
M1	microtubule cytoskeleton organization involved in mitosis	GO:1902850	0.000970828	6	CENPE,GPSM2,KIF2A,KIF11,STIL,TPX2
M1	regulation of cell cycle phase transition	GO:1901987	0.00218061	7	BRCA1,CENPE,KIF14,CDCA5,CDC14B,GEN1,CDC6
M1	DNA recombination	GO:0006310	0.00218061	6	BRCA1,FANCM,EXO1,RBBP8,GEN1,TFRC
M1	negative regulation of integrin activation	GO:0033624	0.00218061	2	KIF14,PTGER4
M1	DNA conformation change	GO:0071103	0.00234269	6	SMC2,CDCA5,ASF1B,NCAPD3,TOP2A,NCAPG
M1	spindle organization	GO:0007051	0.00268661	6	CENPE,GPSM2,KIF2A,KIF11,STIL,TPX2
M1	microtubule cytoskeleton organization	GO:0000226	0.00268661	9	CENPE,GAS2L3,GPSM2,GEN1,STIL,KIF2A,KIF11,CENPJ,TPX2
M1	chromosome separation	GO:0051304	0.00415403	4	FANCM,GEN1,CDC6,CENPE
M1	cell cycle G2/M phase transition	GO:0044839	0.00432877	5	BRCA1,MASTL,KIF14,CDC14B,TAF2
M1	regulation of mitotic sister chromatid segregation	GO:0033047	0.00437703	4	TNKS,GEN1,CDC6,CENPE
M1	regulation of centrosome cycle	GO:0046605	0.00437703	4	KIF11,STIL,CENPJ,GEN1
M1	mitotic cell cycle phase transition	GO:0044772	0.00543292	7	MASTL,CENPE,KIF14,CDCA5,GEN1,TAF2,CDC6
M1	positive regulation of cell cycle process	GO:0090068	0.00722375	6	BRCA1,KIF14,CDCA5,GPSM2,GEN1,CDC6
M1	regulation of chromosome organization	GO:0033044	0.0078061	7	BRCA1,CENPE,CDCA5,GEN1,TOP2A,TNKS,CDC6
M1	cell division	GO:0051301	0.00898433	6	KIF14,ORC6,ANLN,CKAP2,CDC6,PRC1
M1	cytokinesis	GO:0000910	0.0149715	5	KIF14,ANLN,CKAP2,CDC6,PRC1
M1	cell cycle checkpoint	GO:0000075	0.0154693	5	BRCA1,KNTC1,CDC14B,GEN1,ZWILCH
M1	regulation of microtubule cytoskeleton organization	GO:0070507	0.0156856	5	GPSM2,GEN1,CENPJ,KIF11,STIL
M1	regulation of integrin activation	GO:0033623	0.0156856	2	KIF14,PTGER4
M1	regulation of mitotic metaphase/anaphase transition	GO:0030071	0.0164023	3	GEN1,CDC6,CENPE
M1	regulation of metaphase/anaphase transition of cell cycle	GO:1902099	0.0164023	3	GEN1,CDC6,CENPE
M1	spindle assembly	GO:0051225	0.0167262	4	KIF11,GPSM2,KIF2A,TPX2
M1	metaphase/anaphase transition of mitotic cell cycle	GO:0007091	0.0178761	3	GEN1,CDC6,CENPE
M1	regulation of mitotic sister chromatid separation	GO:0010965	0.0178761	3	GEN1,CDC6,CENPE
M1	metaphase/anaphase transition of cell cycle	GO:0044784	0.0178761	3	GEN1,CDC6,CENPE
M1	mitotic sister chromatid separation	GO:0051306	0.01893	3	GEN1,CDC6,CENPE
M1	regulation of centrosome duplication	GO:0010824	0.01893	3	CENPJ,STIL,GEN1
M1	negative regulation of cell cycle	GO:0045786	0.0196452	7	BRCA1,KNTC1,CDC14B,GEN1,ZWILCH,THBS1,TNKS
M1	positive regulation of cell cycle	GO:0045787	0.0204311	6	BRCA1,KIF14,CDCA5,GPSM2,GEN1,CDC6
M1	regulation of chromosome separation	GO:1905818	0.0209615	3	GEN1,CDC6,CENPE
M1	regulation of mitotic cell cycle phase transition	GO:1901990	0.0216111	5	CENPE,KIF14,CDCA5,GEN1,CDC6
M1	regulation of microtubule-based process	GO:0032886	0.0216111	5	GPSM2,GEN1,CENPJ,KIF11,STIL
M1	regulation of plasminogen activation	GO:0010755	0.0243241	2	THBS1,ENO1
M1	cell adhesion mediated by integrin	GO:0033627	0.0243925	3	VTN,ITGA2,ADA
M1	negative regulation of chromosome organization	GO:2001251	0.0263512	4	BRCA1,TOP2A,TNKS,GEN1
M1	regulation of cell division	GO:0051302	0.0263512	4	KIF14,ORC6,CDC6,PRC1
M1	nucleotide metabolic process	GO:0009117	0.0267494	6	DCK,ADA,ENO1,SHMT2,TK1,THBS1
M1	nucleoside phosphate metabolic process	GO:0006753	0.0276689	6	DCK,ADA,ENO1,SHMT2,TK1,THBS1
M1	mitotic metaphase plate congression	GO:0007080	0.0281755	3	KIF14,CDCA5,CENPE
M1	centrosome cycle	GO:0007098	0.0281755	4	KIF11,STIL,GEN1,CENPJ
M1	formation of primary germ layer	GO:0001704	0.0293215	3	VTN,ITGA2,COL5A2
M1	microtubule organizing center organization	GO:0031023	0.0307548	4	KIF11,STIL,GEN1,CENPJ
M1	mitotic spindle assembly	GO:0090307	0.0315737	3	KIF11,KIF2A,TPX2
M1	integrin activation	GO:0033622	0.0316935	2	KIF14,PTGER4
M1	regulation of purine nucleotide metabolic process	GO:1900542	0.0325239	3	SHMT2,THBS1,ENO1
M1	nucleotide biosynthetic process	GO:0009165	0.0331409	4	DCK,TK1,ADA,ENO1
M1	signal transduction involved in G2 DNA damage checkpoint	GO:0072425	0.03325	2	BRCA1,CDC14B
M1	nucleoside phosphate biosynthetic process	GO:1901293	0.0333819	4	DCK,TK1,ADA,ENO1
M1	centrosome duplication	GO:0051298	0.0333819	3	CENPJ,STIL,GEN1
M1	nucleobase-containing small molecule metabolic process	GO:0055086	0.0364562	6	DCK,ADA,ENO1,SHMT2,TK1,THBS1
M1	regulation of nucleotide metabolic process	GO:0006140	0.0366659	3	SHMT2,THBS1,ENO1
M1	regulation of centriole replication	GO:0046599	0.0366659	2	CENPJ,STIL
M1	metaphase plate congression	GO:0051310	0.0375086	3	KIF14,CDCA5,CENPE
M1	regulation of cell cycle G2/M phase transition	GO:1902749	0.0383154	3	BRCA1,CDC14B,KIF14
M1	chromosome localization	GO:0050000	0.0383154	3	KIF14,CDCA5,CENPE
M1	establishment of chromosome localization	GO:0051303	0.0383154	3	KIF14,CDCA5,CENPE
M1	gastrulation	GO:0007369	0.0424202	3	VTN,ITGA2,COL5A2
M1	regulation of sister chromatid cohesion	GO:0007063	0.0453812	2	TNKS,CDCA5
M1	plasminogen activation	GO:0031639	0.0453812	2	THBS1,ENO1
M1	G2/M transition of mitotic cell cycle	GO:0000086	0.0477669	3	KIF14,TAF2,MASTL
M1	negative regulation of mitotic cell cycle	GO:0045930	0.0481469	4	TNKS,ZWILCH,GEN1,KNTC1
M1	protein ADP-ribosylation	GO:0006471	0.0481469	2	TNKS,PARP2
M1	mitotic sister chromatid cohesion	GO:0007064	0.0502625	2	TNKS,CDCA5
M1	protein localization to chromosome	GO:0034502	0.0545075	3	TNKS,CDCA5,KNL1
M1	negative regulation of cell cycle process	GO:0010948	0.0547077	4	BRCA1,TNKS,CDC14B,GEN1
M1	negative regulation of mitotic sister chromatid segregation	GO:0033048	0.0549172	2	TNKS,GEN1
M1	regulation of cytokinesis	GO:0032465	0.0563686	3	KIF14,CDC6,PRC1
M1	establishment of organelle localization	GO:0051656	0.0563686	4	KIF14,CDCA5,GPSM2,CENPE
M1	negative regulation of sister chromatid segregation	GO:0033046	0.0566338	2	TNKS,GEN1
M1	negative regulation of chromosome segregation	GO:0051985	0.0566338	2	TNKS,GEN1
M1	double-strand break repair via homologous recombination	GO:0000724	0.0566338	3	BRCA1,RBBP8,GEN1
M1	regulation of small molecule metabolic process	GO:0062012	0.0566338	4	BRCA1,THBS1,SHMT2,ENO1
M1	recombinational repair	GO:0000725	0.0569922	3	BRCA1,RBBP8,GEN1
M1	double-strand break repair	GO:0006302	0.0569922	4	BRCA1,CDCA5,RBBP8,GEN1
M1	attachment of spindle microtubules to kinetochore	GO:0008608	0.0605319	2	KNL1,CENPE
M1	mitotic cell cycle checkpoint	GO:0007093	0.0618063	3	ZWILCH,GEN1,KNTC1
M1	G2 DNA damage checkpoint	GO:0031572	0.0631708	2	BRCA1,CDC14B
M1	signal transduction involved in DNA integrity checkpoint	GO:0072401	0.0631708	2	BRCA1,CDC14B
M1	signal transduction involved in DNA damage checkpoint	GO:0072422	0.0631708	2	BRCA1,CDC14B
M1	centriole replication	GO:0007099	0.0631708	2	STIL,CENPJ
M1	activation of protein kinase activity	GO:0032147	0.0638376	4	KIF14,THBS1,TNIK,TPX2
M1	signal transduction involved in cell cycle checkpoint	GO:0072395	0.0660322	2	BRCA1,CDC14B
M1	regulation of ATP metabolic process	GO:1903578	0.0660322	2	SHMT2,ENO1
M1	centriole assembly	GO:0098534	0.0660322	2	STIL,CENPJ
M1	regulation of extrinsic apoptotic signaling pathway via death domain receptors	GO:1902041	0.0696468	2	BRCA1,THBS1
M1	fatty acid transport	GO:0015908	0.0696468	2	ABCC4,THBS1
M1	DNA repair	GO:0006281	0.0717086	5	BRCA1,EXO1,CDCA5,RBBP8,GEN1
M1	negative regulation of cell cycle phase transition	GO:1901988	0.0719567	3	BRCA1,CDC14B,GEN1
M1	negative regulation of mitotic nuclear division	GO:0045839	0.0728446	2	TNKS,GEN1
M1	organophosphate biosynthetic process	GO:0090407	0.0748414	4	DCK,TK1,ADA,ENO1
M1	cell-substrate adhesion	GO:0031589	0.0748414	4	VTN,THBS1,ITGA2,KIF14
M1	positive regulation of protein kinase activity	GO:0045860	0.0748414	5	TNIK,CENPE,KIF14,THBS1,TPX2
M1	negative regulation of nuclear division	GO:0051784	0.0748686	2	TNKS,GEN1
M1	endodermal cell differentiation	GO:0035987	0.0748686	2	VTN,COL5A2
M1	purine nucleotide metabolic process	GO:0006163	0.0762113	4	SHMT2,THBS1,ADA,ENO1
M1	positive regulation of cytokinesis	GO:0032467	0.0762113	2	KIF14,CDC6
M1	endoderm formation	GO:0001706	0.0775641	2	VTN,COL5A2
M1	endoderm development	GO:0007492	0.0775641	2	VTN,COL5A2
M1	regulation of cytoskeleton organization	GO:0051493	0.0798438	5	GPSM2,GEN1,KIF11,CENPJ,STIL
M1	negative regulation of cell cycle G2/M phase transition	GO:1902750	0.0836973	2	BRCA1,CDC14B
M1	positive regulation of kinase activity	GO:0033674	0.0848283	5	TNIK,CENPE,KIF14,THBS1,TPX2
M1	positive regulation of cell division	GO:0051781	0.0859932	2	KIF14,CDC6
M1	sister chromatid cohesion	GO:0007062	0.0859932	2	TNKS,CDCA5
M1	zymogen activation	GO:0031638	0.0859932	2	THBS1,ENO1
M1	organelle localization	GO:0051640	0.0872529	4	KIF14,CDCA5,GPSM2,CENPE
M1	embryonic morphogenesis	GO:0048598	0.0886184	3	VTN,ITGA2,COL5A2
M1	purine-containing compound metabolic process	GO:0072521	0.0898605	4	SHMT2,THBS1,ADA,ENO1
M1	nucleoside monophosphate metabolic process	GO:0009123	0.0898605	3	SHMT2,DCK,ENO1
M1	monocarboxylic acid transport	GO:0015718	0.0898605	2	ABCC4,THBS1
M1	regulation of protein processing	GO:0070613	0.0898605	2	THBS1,ENO1
M1	positive regulation of leukocyte mediated immunity	GO:0002705	0.0914462	2	TFRC,ARG1
M1	cell-matrix adhesion	GO:0007160	0.0931748	3	VTN,THBS1,ITGA2
M1	regulation of protein maturation	GO:1903317	0.0942453	2	THBS1,ENO1
M1	negative regulation of organelle organization	GO:0010639	0.095853	4	BRCA1,TOP2A,TNKS,GEN1
M2	regulation of vasculature development	GO:1901342	1.79e-05	19	ROCK2,BMP4,THBS4,NF1,RAPGEF3,WNT5A,CD34,ITGB1BP1,AGTR1,SERPINE1,GATA2,PPARG,DCN,KLF4,ADAM12,ATF2,PGK1,VEGFA,MEOX2
M2	vasculature development	GO:0001944	2.99e-05	23	FZD4,ROCK2,BMP4,THBS4,NF1,RAPGEF3,LOXL2,WNT5A,CD34,ITGB1BP1,PECAM1,AGTR1,SERPINE1,GATA2,ROBO1,PPARG,KLF4,DCN,ADAM12,ATF2,PGK1,VEGFA,MEOX2
M2	cardiovascular system development	GO:0072358	2.99e-05	23	FZD4,ROCK2,BMP4,THBS4,NF1,RAPGEF3,LOXL2,WNT5A,CD34,ITGB1BP1,PECAM1,AGTR1,SERPINE1,GATA2,ROBO1,PPARG,KLF4,DCN,ADAM12,ATF2,PGK1,VEGFA,MEOX2
M2	regulation of angiogenesis	GO:0045765	2.99e-05	18	GATA2,DCN,ROCK2,KLF4,ADAM12,ATF2,RAPGEF3,PGK1,WNT5A,CD34,THBS4,ITGB1BP1,VEGFA,AGTR1,NF1,PPARG,SERPINE1,MEOX2
M2	angiogenesis	GO:0001525	3.1e-05	21	ROCK2,BMP4,THBS4,NF1,RAPGEF3,LOXL2,WNT5A,CD34,ITGB1BP1,AGTR1,SERPINE1,GATA2,ROBO1,PPARG,KLF4,DCN,ADAM12,ATF2,PGK1,VEGFA,MEOX2
M2	blood vessel development	GO:0001568	4.52e-05	22	ROCK2,BMP4,THBS4,NF1,RAPGEF3,LOXL2,WNT5A,CD34,ITGB1BP1,PECAM1,AGTR1,SERPINE1,GATA2,ROBO1,PPARG,KLF4,DCN,ADAM12,ATF2,PGK1,VEGFA,MEOX2
M2	negative regulation of cell migration	GO:0030336	4.86e-05	17	IGFBP5,KLF4,MCC,NAV3,DAG1,DCN,ROBO1,CLIC4,BMPR1A,CXCL12,STK26,SFRP1,ITGB1BP1,NF1,PPARG,SERPINE1,MEOX2
M2	blood vessel morphogenesis	GO:0048514	7.5e-05	21	ROCK2,BMP4,THBS4,NF1,RAPGEF3,LOXL2,WNT5A,CD34,ITGB1BP1,AGTR1,SERPINE1,GATA2,ROBO1,PPARG,KLF4,DCN,ADAM12,ATF2,PGK1,VEGFA,MEOX2
M2	endothelial cell proliferation	GO:0001935	8.85e-05	13	GATA2,BMP4,LOXL2,WNT5A,CD34,THBS4,ITGB1BP1,AGTR1,EGFL7,NF1,PPARG,NRAS,VEGFA
M2	negative regulation of cell motility	GO:2000146	9.54e-05	17	IGFBP5,KLF4,MCC,NAV3,DAG1,DCN,ROBO1,CLIC4,BMPR1A,CXCL12,STK26,SFRP1,ITGB1BP1,NF1,PPARG,SERPINE1,MEOX2
M2	epithelial cell proliferation	GO:0050673	0.000113759	17	GATA2,MCC,ROBO1,BMP4,LOXL2,WNT5A,CD34,THBS4,VEGFA,SFRP1,ITGB1BP1,AGTR1,EGFL7,NF1,MAGED1,NRAS,PPARG
M2	negative regulation of cellular component movement	GO:0051271	0.000113759	17	IGFBP5,KLF4,MCC,NAV3,DAG1,DCN,ROBO1,CLIC4,BMPR1A,CXCL12,STK26,SFRP1,ITGB1BP1,NF1,PPARG,SERPINE1,MEOX2
M2	tube morphogenesis	GO:0035239	0.000115826	22	ROCK2,BMP4,THBS4,NF1,RAPGEF3,LOXL2,WNT5A,CD34,ITGB1BP1,AGTR1,SERPINE1,GATA2,ROBO1,CTNNB1,PPARG,KLF4,DCN,ADAM12,ATF2,PGK1,VEGFA,MEOX2
M2	tube development	GO:0035295	0.000161102	23	ROCK2,LIF,BMP4,THBS4,NF1,RAPGEF3,LOXL2,WNT5A,CD34,ITGB1BP1,AGTR1,SERPINE1,GATA2,ROBO1,CTNNB1,PPARG,KLF4,DCN,ADAM12,ATF2,PGK1,VEGFA,MEOX2
M2	negative regulation of cell proliferation	GO:0008285	0.00020509	22	CDKN1B,BMP4,KLF11,STRN,SFRP1,DDAH1,NF1,MAGED1,IGFBP5,INHBA,FKTN,WNT5A,ITGB1BP1,ROR2,GATA2,MCC,ROBO1,ITGA1,GPNMB,ATM,CTNNB1,PPARG
M2	negative regulation of vasculature development	GO:1901343	0.00020509	11	DCN,ROCK2,KLF4,ATF2,BMP4,PGK1,THBS4,ITGB1BP1,PPARG,SERPINE1,MEOX2
M2	negative regulation of locomotion	GO:0040013	0.00020581	17	IGFBP5,KLF4,MCC,NAV3,DAG1,DCN,ROBO1,CLIC4,BMPR1A,CXCL12,STK26,SFRP1,ITGB1BP1,NF1,PPARG,SERPINE1,MEOX2
M2	interleukin-2 production	GO:0032623	0.000412114	7	NAV3,MAP3K7,MALT1,CD34,KAT5,PNP,RUNX1
M2	negative regulation of angiogenesis	GO:0016525	0.000516916	10	DCN,ROCK2,KLF4,ATF2,PGK1,THBS4,ITGB1BP1,PPARG,SERPINE1,MEOX2
M2	negative regulation of blood vessel morphogenesis	GO:2000181	0.000618027	10	DCN,ROCK2,KLF4,ATF2,PGK1,THBS4,ITGB1BP1,PPARG,SERPINE1,MEOX2
M2	endothelial cell migration	GO:0043542	0.000625985	14	GATA2,KLF4,ROCK2,DCN,ROBO1,BMP4,LOXL2,WNT5A,PTP4A3,ITGB1BP1,NF1,PPARG,VEGFA,MEOX2
M2	hemopoiesis	GO:0030097	0.00115207	17	GATA2,KLF4,PNP,LIF,INHBA,BMP4,AXL,WNT5A,FLT3LG,CD34,CD46,SFRP1,DUSP10,NOTCH2,PPARG,RUNX1,VEGFA
M2	blood vessel endothelial cell proliferation involved in sprouting angiogenesis	GO:0002043	0.00118538	5	GATA2,BMP4,ITGB1BP1,AGTR1,VEGFA
M2	epithelial cell migration	GO:0010631	0.00135976	16	GATA2,KLF4,ROCK2,MCC,DCN,ROBO1,BMP4,LOXL2,WNT5A,PKN1,PTP4A3,ITGB1BP1,NF1,PPARG,VEGFA,MEOX2
M2	tissue migration	GO:0090130	0.00135976	16	GATA2,KLF4,ROCK2,MCC,DCN,ROBO1,BMP4,LOXL2,WNT5A,PKN1,PTP4A3,ITGB1BP1,NF1,PPARG,VEGFA,MEOX2
M2	epithelium migration	GO:0090132	0.00135976	16	GATA2,KLF4,ROCK2,MCC,DCN,ROBO1,BMP4,LOXL2,WNT5A,PKN1,PTP4A3,ITGB1BP1,NF1,PPARG,VEGFA,MEOX2
M2	sprouting angiogenesis	GO:0002040	0.00138521	9	GATA2,KLF4,ROBO1,BMP4,LOXL2,ITGB1BP1,AGTR1,VEGFA,MEOX2
M2	hematopoietic or lymphoid organ development	GO:0048534	0.0014315	17	GATA2,KLF4,PNP,LIF,INHBA,BMP4,AXL,WNT5A,FLT3LG,CD34,CD46,SFRP1,DUSP10,NOTCH2,PPARG,RUNX1,VEGFA
M2	regulation of epithelial cell proliferation	GO:0050678	0.00145159	14	GATA2,MCC,ROBO1,BMP4,WNT5A,THBS4,SFRP1,PPARG,AGTR1,EGFL7,NF1,MAGED1,NRAS,VEGFA
M2	epidermis development	GO:0008544	0.00189817	9	ROCK2,TXNIP,PLOD1,INHBA,NCOA3,BMP4,CLIC4,WNT5A,ATP2C1
M2	regulation of endothelial cell proliferation	GO:0001936	0.00234269	10	GATA2,BMP4,WNT5A,THBS4,AGTR1,EGFL7,NF1,PPARG,NRAS,VEGFA
M2	regulation of interleukin-2 production	GO:0032663	0.00245286	6	NAV3,MAP3K7,MALT1,CD34,KAT5,RUNX1
M2	immune system development	GO:0002520	0.00274356	17	GATA2,KLF4,PNP,LIF,INHBA,BMP4,AXL,WNT5A,FLT3LG,CD34,CD46,SFRP1,DUSP10,NOTCH2,PPARG,RUNX1,VEGFA
M2	leukocyte differentiation	GO:0002521	0.00274356	12	GATA2,PNP,LIF,BMP4,AXL,CD46,NOTCH2,SFRP1,DUSP10,PPARG,RUNX1,VEGFA
M2	ameboidal-type cell migration	GO:0001667	0.00326451	16	GATA2,KLF4,ROCK2,MCC,DCN,ROBO1,BMP4,LOXL2,WNT5A,PKN1,PTP4A3,ITGB1BP1,NF1,PPARG,VEGFA,MEOX2
M2	positive regulation of endothelial cell proliferation	GO:0001938	0.00332467	8	GATA2,BMP4,WNT5A,THBS4,AGTR1,EGFL7,NRAS,VEGFA
M2	epithelium development	GO:0060429	0.00350183	19	ROCK2,TXNIP,PDPN,LIF,NCOA3,BMP4,INHBA,RAPGEF3,WNT5A,CD34,PECAM1,SERPINE1,RDX,ROBO1,CLIC4,TAGLN2,CTNNB1,CPT1A,PGK1
M2	response to estradiol	GO:0032355	0.00490066	5	NCOA3,NRIP1,SFRP1,CTNNB1,KAT5
M2	negative regulation of MAPK cascade	GO:0043409	0.0050054	9	DAG1,FKTN,BMP4,IRAK3,DUSP1,DUSP10,ITGB1BP1,GPS2,NF1
M2	negative regulation of lipid storage	GO:0010888	0.0050054	4	PNPLA2,NFKBIA,PPARG,NR1H3
M2	regulation of leukocyte differentiation	GO:1902105	0.00543292	9	LIF,BMP4,AXL,CD46,NOTCH2,SFRP1,DUSP10,PNP,RUNX1
M2	epithelial cell differentiation	GO:0030855	0.00602102	14	ROCK2,TXNIP,LIF,NCOA3,RAPGEF3,BMP4,RDX,PGK1,CLIC4,WNT5A,CD34,SERPINE1,TAGLN2,CPT1A
M2	regulation of endothelial cell migration	GO:0010594	0.00602102	11	GATA2,DCN,ROCK2,KLF4,BMP4,WNT5A,ITGB1BP1,NF1,PPARG,VEGFA,MEOX2
M2	regulation of lymphocyte differentiation	GO:0045619	0.0069101	6	BMP4,AXL,CD46,DUSP10,SFRP1,PNP
M2	cell migration involved in sprouting angiogenesis	GO:0002042	0.00895278	6	GATA2,KLF4,ROBO1,ITGB1BP1,VEGFA,MEOX2
M2	cellular response to estradiol stimulus	GO:0071392	0.00895278	4	NCOA3,NRIP1,KAT5,SFRP1
M2	response to growth factor	GO:0070848	0.0100238	18	SHC1,KLF4,DCN,TPR,TRIM33,ROBO1,BMP4,JUN,BMPR1A,PDE2A,NTRK2,WNT5A,PTPN11,SFRP1,ITGB1BP1,CLEC3B,CTNNB1,VEGFA
M2	cell differentiation involved in metanephros development	GO:0072202	0.0107323	3	LIF,CD34,BMP4
M2	glomerulus vasculature development	GO:0072012	0.0107323	3	CD34,BMP4,PECAM1
M2	positive regulation of epithelial cell proliferation	GO:0050679	0.0136924	9	GATA2,BMP4,WNT5A,THBS4,SFRP1,AGTR1,EGFL7,NRAS,VEGFA
M2	positive regulation of DNA binding transcription factor activity	GO:0051091	0.0139774	12	FZD4,ATF2,MALT1,IRAK3,TRIM37,WNT5A,CD36,ROR1,CAPN3,CTNNB1,PPARG,VEGFA
M2	negative regulation of phosphorylation	GO:0042326	0.0143968	15	SOCS5,CDKN1B,DAG1,ANKLE2,FKTN,BMP4,IRAK3,SH3BP5,WWTR1,DUSP1,DUSP10,SFRP1,ITGB1BP1,GPS2,NF1
M2	regulation of DNA binding transcription factor activity	GO:0051090	0.0143968	16	FZD4,KLF4,WFS1,SIGIRR,MALT1,IRAK3,ATF2,TRIM37,WNT5A,CD36,ROR1,NFKBIA,CAPN3,CTNNB1,PPARG,VEGFA
M2	kidney development	GO:0001822	0.0149715	7	LIF,WFS1,BMP4,CD34,PECAM1,AGTR1,PLCE1
M2	positive regulation of angiogenesis	GO:0045766	0.0149715	9	GATA2,KLF4,ADAM12,RAPGEF3,WNT5A,CD34,VEGFA,AGTR1,SERPINE1
M2	gastrulation	GO:0007369	0.0149715	7	KLF4,DAG1,INHBA,BMP4,COL8A1,COL11A1,FN1
M2	cellular response to growth factor stimulus	GO:0071363	0.0149715	17	SHC1,KLF4,DCN,TRIM33,ROBO1,BMP4,JUN,BMPR1A,PDE2A,NTRK2,WNT5A,PTPN11,SFRP1,ITGB1BP1,CLEC3B,CTNNB1,VEGFA
M2	regulation of cell migration involved in sprouting angiogenesis	GO:0090049	0.0149715	5	GATA2,KLF4,ITGB1BP1,VEGFA,MEOX2
M2	positive regulation of blood vessel endothelial cell proliferation involved in sprouting angiogenesis	GO:1903589	0.0155364	3	GATA2,AGTR1,VEGFA
M2	renal system vasculature development	GO:0061437	0.0155364	3	CD34,BMP4,PECAM1
M2	kidney vasculature development	GO:0061440	0.0155364	3	CD34,BMP4,PECAM1
M2	cell-cell adhesion	GO:0098609	0.0156856	17	KLF4,PNP,PDPN,RDX,ROBO1,BMP4,CD34,THBS4,CD46,DUSP10,PECAM1,ATP2C1,GPNMB,CXCL12,CTNNB1,ADGRL3,PSEN1
M2	regulation of epithelial cell migration	GO:0010632	0.0156856	12	GATA2,DCN,ROCK2,MCC,KLF4,BMP4,WNT5A,ITGB1BP1,NF1,PPARG,VEGFA,MEOX2
M2	glomerulus development	GO:0032835	0.0156856	4	CD34,BMP4,PLCE1,PECAM1
M2	regulation of vascular smooth muscle cell proliferation	GO:1904705	0.0156856	5	IGFBP5,CDKN1B,JUN,BMPR1A,PPARG
M2	vascular smooth muscle cell proliferation	GO:1990874	0.0156856	5	IGFBP5,CDKN1B,JUN,BMPR1A,PPARG
M2	regulation of smooth muscle cell proliferation	GO:0048660	0.0161275	7	IGFBP5,CDKN1B,BMP4,JUN,BMPR1A,CTNNB1,PPARG
M2	positive regulation of vasculature development	GO:1904018	0.0164023	9	GATA2,KLF4,ADAM12,RAPGEF3,WNT5A,CD34,VEGFA,AGTR1,SERPINE1
M2	negative regulation of protein phosphorylation	GO:0001933	0.0164023	14	SOCS5,CDKN1B,DAG1,FKTN,BMP4,IRAK3,SH3BP5,WWTR1,DUSP1,DUSP10,SFRP1,ITGB1BP1,GPS2,NF1
M2	endothelium development	GO:0003158	0.0164023	7	ROCK2,RDX,RAPGEF3,BMP4,CD34,PECAM1,CTNNB1
M2	regulation of MAP kinase activity	GO:0043405	0.0164023	11	SHC1,MAP3K7,ROBO1,BMP4,IRAK3,MDFIC,WNT5A,DUSP1,DUSP10,PLCE1,VEGFA
M2	smooth muscle cell proliferation	GO:0048659	0.0164023	7	IGFBP5,CDKN1B,BMP4,JUN,BMPR1A,CTNNB1,PPARG
M2	glomerular endothelium development	GO:0072011	0.0164023	2	CD34,PECAM1
M2	Wnt signaling pathway, calcium modulating pathway	GO:0007223	0.0164023	2	FZD4,WNT5A
M2	invadopodium organization	GO:1905863	0.0164023	2	NAV3,PDPN
M2	regulation of protein import into nucleus	GO:0042306	0.0165834	5	UBR5,TPR,BMP4,PDE2A,PSEN1
M2	regulation of hemopoiesis	GO:1903706	0.0165937	10	INHBA,LIF,BMP4,AXL,CD46,NOTCH2,SFRP1,DUSP10,PNP,RUNX1
M2	regulation of sprouting angiogenesis	GO:1903670	0.0167262	6	GATA2,KLF4,ITGB1BP1,AGTR1,VEGFA,MEOX2
M2	blood vessel endothelial cell migration	GO:0043534	0.0167262	8	GATA2,KLF4,ROBO1,ITGB1BP1,NF1,PPARG,VEGFA,MEOX2
M2	negative regulation of intracellular signal transduction	GO:1902532	0.0178302	17	DAG1,FKTN,BMP4,IRAK3,PLAUR,PDE2A,DUSP1,CXCL12,DUSP10,ITGB1BP1,CD2AP,ATM,DDX3X,GPS2,NF1,ITPR1,SRI
M2	pri-miRNA transcription by RNA polymerase II	GO:0061614	0.0180389	5	GATA2,KLF4,BMP4,JUN,PPARG
M2	embryonic morphogenesis	GO:0048598	0.0185571	9	COL2A1,KLF4,DAG1,MSX1,INHBA,BMP4,COL8A1,COL11A1,FN1
M2	response to lipoprotein particle	GO:0055094	0.0185571	3	CD36,LDLR,PPARG
M2	nephron development	GO:0072006	0.0196452	5	LIF,BMP4,CD34,PECAM1,PLCE1
M2	regulation of protein import	GO:1904589	0.0196452	5	UBR5,TPR,BMP4,PDE2A,PSEN1
M2	lipid storage	GO:0019915	0.0196452	5	NR1H3,PNPLA2,CD36,NFKBIA,PPARG
M2	positive regulation of leukocyte differentiation	GO:1902107	0.0204311	6	LIF,AXL,CD46,DUSP10,PNP,RUNX1
M2	extrinsic apoptotic signaling pathway via death domain receptors	GO:0008625	0.0204311	6	FEM1B,FAIM2,CASP8AP2,DDX3X,SFRP1,SERPINE1
M2	sensory perception of sound	GO:0007605	0.0204311	6	COL2A1,WFS1,COL11A1,ROR1,CLIC5,CEMIP
M2	sensory perception of mechanical stimulus	GO:0050954	0.0204311	6	COL2A1,WFS1,COL11A1,ROR1,CLIC5,CEMIP
M2	negative regulation of cytokine production	GO:0001818	0.021007	10	KLF4,NAV3,IRAK3,REL,AXL,CD34,TRIB2,GPNMB,KAT5,FN1
M2	embryo development	GO:0009790	0.0211901	11	COL2A1,KLF4,DAG1,MSX1,INHBA,BMP4,COL8A1,WNT5A,FLT3LG,COL11A1,FN1
M2	regulation of protein serine/threonine kinase activity	GO:0071900	0.0219537	14	SHC1,CDKN1B,MAP3K7,ROBO1,BMP4,IRAK3,MDFIC,WNT5A,DUSP1,CEMIP,DUSP10,DDX3X,PLCE1,VEGFA
M2	positive regulation of cell migration	GO:0030335	0.0227548	16	IGFBP5,GATA2,ROCK2,PDPN,RDX,BMP4,WNT5A,CXCL12,THBS4,CEMIP,ITGB1BP1,VEGFA,ROR2,GPNMB,SERPINE1,FN1
M2	metanephric nephron development	GO:0072210	0.0230834	3	LIF,CD34,BMP4
M2	cellular response to lipoprotein particle stimulus	GO:0071402	0.0230834	3	CD36,LDLR,PPARG
M2	odontogenesis	GO:0042476	0.0231465	5	MSX1,INHBA,BMP4,CD34,SERPINE1
M2	regulation of blood vessel endothelial cell migration	GO:0043535	0.023416	7	GATA2,KLF4,ITGB1BP1,NF1,PPARG,VEGFA,MEOX2
M2	positive regulation of lymphocyte differentiation	GO:0045621	0.0246579	4	CD46,PNP,DUSP10,AXL
M2	muscle cell proliferation	GO:0033002	0.0246579	7	IGFBP5,CDKN1B,BMP4,JUN,BMPR1A,CTNNB1,PPARG
M2	epidermal cell differentiation	GO:0009913	0.024723	6	ROCK2,TXNIP,NCOA3,BMP4,CLIC4,WNT5A
M2	renal system development	GO:0072001	0.0261061	7	LIF,WFS1,BMP4,CD34,PECAM1,AGTR1,PLCE1
M2	response to hormone	GO:0009725	0.0261061	15	ROCK2,UBR5,NCOA3,BMP4,NRIP1,NR1H3,CACNA1H,PTPN11,SFRP1,CTNNB1,AGTR1,TBC1D4,THRA,KAT5,PPARG
M2	heart development	GO:0007507	0.0261061	9	NEBL,BMP4,MEF2A,TAB2,PTPN11,NOTCH2,NPY1R,ZFPM2,TNNC1
M2	I-kappaB kinase/NF-kappaB signaling	GO:0007249	0.0263512	10	ROCK2,S100A4,MAP3K7,TNFSF10,TAB2,REL,LPAR1,ROR1,NFKBIA,CAPN3
M2	positive regulation of cell motility	GO:2000147	0.0274733	16	IGFBP5,GATA2,ROCK2,PDPN,RDX,BMP4,WNT5A,CXCL12,THBS4,CEMIP,ITGB1BP1,VEGFA,ROR2,GPNMB,SERPINE1,FN1
M2	lymphocyte differentiation	GO:0030098	0.0276086	6	BMP4,AXL,CD46,DUSP10,SFRP1,PNP
M2	negative regulation of fat cell differentiation	GO:0045599	0.0276086	3	GATA2,WNT5A,ZFPM2
M2	regulation of protein import into nucleus, translocation	GO:0033158	0.0276086	3	PDE2A,UBR5,PSEN1
M2	urogenital system development	GO:0001655	0.0279376	7	LIF,WFS1,BMP4,CD34,PECAM1,AGTR1,PLCE1
M2	positive regulation of hemopoiesis	GO:1903708	0.0281755	7	LIF,INHBA,AXL,CD46,DUSP10,PNP,RUNX1
M2	positive regulation of cellular component movement	GO:0051272	0.0281755	16	IGFBP5,GATA2,ROCK2,PDPN,RDX,BMP4,WNT5A,CXCL12,THBS4,CEMIP,ITGB1BP1,VEGFA,ROR2,GPNMB,SERPINE1,FN1
M2	regulation of cellular protein localization	GO:1903827	0.0281755	15	ROCK2,UBR5,TPR,LIF,STX8,RAPGEF3,BMP4,RDX,PDE2A,ITGB1BP1,KIF5B,LZTFL1,CTNNB1,CEMIP,PSEN1
M2	negative regulation of mesenchymal cell proliferation	GO:0072201	0.0281755	2	WNT5A,BMP4
M2	histone modification	GO:0016570	0.0281755	16	RYBP,UBR5,AUTS2,LIF,KMT2A,NCOA3,SGF29,MAP3K7,KDM5B,TRIP12,ATF2,TRIM37,PKN1,RCOR1,KAT5,VEGFA
M2	positive regulation of protein acetylation	GO:1901985	0.0281755	4	LIF,RAPGEF3,KAT5,AUTS2
M2	hemoglobin metabolic process	GO:0020027	0.0281755	2	INHBA,KLF4
M2	hemoglobin biosynthetic process	GO:0042541	0.0281755	2	INHBA,KLF4
M2	histone H2A ubiquitination	GO:0033522	0.0281755	4	TRIP12,RYBP,UBR5,TRIM37
M2	cGMP metabolic process	GO:0046068	0.0281755	4	NPR1,PDE2A,WNT5A,VEGFA
M2	response to anticoagulant	GO:0061476	0.0281755	2	GPIHBP1,SFRP1
M2	response to heparin	GO:0071503	0.0281755	2	GPIHBP1,SFRP1
M2	negative regulation of histone ubiquitination	GO:0033183	0.0281755	2	TRIP12,UBR5
M2	regulation of histone H2A K63-linked ubiquitination	GO:1901314	0.0281755	2	TRIP12,UBR5
M2	negative regulation of histone H2A K63-linked ubiquitination	GO:1901315	0.0281755	2	TRIP12,UBR5
M2	fat cell differentiation	GO:0045444	0.0291469	5	GATA2,PSMB8,WNT5A,ZFPM2,SFRP1
M2	regulation of blood vessel endothelial cell proliferation involved in sprouting angiogenesis	GO:1903587	0.0307548	3	GATA2,AGTR1,VEGFA
M2	tube formation	GO:0035148	0.0307548	3	BMP4,ITGB1BP1,VEGFA
M2	regulation of protein localization to nucleus	GO:1900180	0.0307548	6	UBR5,TPR,LIF,BMP4,PDE2A,PSEN1
M2	regulation of SMAD protein signal transduction	GO:0060390	0.0307548	3	WWTR1,BMPR1A,BMP4
M2	covalent chromatin modification	GO:0016569	0.0307548	16	RYBP,UBR5,AUTS2,LIF,KMT2A,NCOA3,SGF29,MAP3K7,KDM5B,TRIP12,ATF2,TRIM37,PKN1,RCOR1,KAT5,VEGFA
M2	negative regulation of interleukin-2 production	GO:0032703	0.0307548	3	NAV3,KAT5,CD34
M2	positive regulation of cholesterol efflux	GO:0010875	0.0307548	3	NFKBIA,GPS2,NR1H3
M2	positive regulation of cytokine production involved in immune response	GO:0002720	0.0307548	3	WNT5A,MALT1,MAP3K7
M2	regulation of lipid storage	GO:0010883	0.0311765	4	PNPLA2,NFKBIA,PPARG,NR1H3
M2	small GTPase mediated signal transduction	GO:0007264	0.0313345	9	SHOC2,PDPN,ROBO1,RAPGEF3,JUN,NOTCH2,CD2AP,AGTR1,PLCE1
M2	activation of MAPK activity	GO:0000187	0.0317544	6	SHC1,MAP3K7,BMP4,MDFIC,WNT5A,PLCE1
M2	myeloid leukocyte differentiation	GO:0002573	0.0317544	7	GATA2,LIF,BMP4,NOTCH2,PPARG,RUNX1,VEGFA
M2	epithelial to mesenchymal transition	GO:0001837	0.0317544	7	DAG1,PDPN,WWTR1,LOXL2,WNT5A,SFRP1,CTNNB1
M2	regulation of epithelial to mesenchymal transition	GO:0010717	0.0317544	6	DAG1,PDPN,WWTR1,LOXL2,SFRP1,CTNNB1
M2	negative regulation of epithelial cell migration	GO:0010633	0.0317544	6	DCN,MCC,KLF4,ITGB1BP1,PPARG,MEOX2
M2	cell-cell adhesion via plasma-membrane adhesion molecules	GO:0098742	0.032163	5	KLF4,ROBO1,ADGRL3,PECAM1,ATP2C1
M2	regulation of intracellular transport	GO:0032386	0.0322574	11	RAB21,UBR5,TPR,RDX,RAPGEF3,BMP4,RAB5A,PDE2A,ITGB1BP1,CEMIP,PSEN1
M2	positive regulation of sprouting angiogenesis	GO:1903672	0.0325239	4	GATA2,AGTR1,KLF4,VEGFA
M2	cellular response to metal ion	GO:0071248	0.0325239	7	CDKN1B,TF,CLIC4,MEF2A,JUN,CACNA1H,WNT5A
M2	regulation of nucleocytoplasmic transport	GO:0046822	0.0325239	6	UBR5,TPR,RAPGEF3,BMP4,PDE2A,PSEN1
M2	nephron epithelium development	GO:0072009	0.0325239	4	LIF,CD34,BMP4,PECAM1
M2	proteoglycan biosynthetic process	GO:0030166	0.0325239	4	CHSY1,CTNNB1,GLCE,CSGALNACT1
M2	negative regulation of lipid localization	GO:1905953	0.0325239	4	PNPLA2,NFKBIA,PPARG,NR1H3
M2	cell surface receptor signaling pathway involved in cell-cell signaling	GO:1905114	0.0331409	13	FZD4,MCC,UBR5,BMP4,RAB5A,STRN,MDFIC,WNT5A,WWTR1,SFRP1,ROR1,DDX3X,CTNNB1
M2	negative regulation of protein kinase activity	GO:0006469	0.0333819	9	CDKN1B,BMP4,IRAK3,WWTR1,DUSP1,DUSP10,ITGB1BP1,SOCS5,SH3BP5
M2	negative regulation of epithelial cell proliferation	GO:0050680	0.0333819	6	MCC,ROBO1,MAGED1,SFRP1,NF1,PPARG
M2	animal organ morphogenesis	GO:0009887	0.0334046	11	COL2A1,MSX1,LIF,INHBA,BMP4,CD34,TNNC1,NPY1R,NOTCH2,ZFPM2,SERPINE1
M2	macrophage differentiation	GO:0030225	0.0334046	3	LIF,BMP4,VEGFA
M2	face development	GO:0060324	0.0334046	3	WNT5A,PTPN11,MSX1
M2	positive regulation of blood coagulation	GO:0030194	0.0334046	3	PDPN,ENPP4,SERPINE1
M2	positive regulation of coagulation	GO:0050820	0.0334046	3	PDPN,ENPP4,SERPINE1
M2	positive regulation of hemostasis	GO:1900048	0.0334046	3	PDPN,ENPP4,SERPINE1
M2	histone acetylation	GO:0016573	0.0337539	8	MAP3K7,SGF29,AUTS2,LIF,KMT2A,NCOA3,ATF2,KAT5
M2	divalent metal ion transport	GO:0070838	0.0347242	12	SLC30A9,WFS1,CACNA1H,PANX1,AHNAK,ATP2C1,TRPC6,CTNNB1,ITPR1,SRI,CEMIP,PSEN1
M2	divalent inorganic cation transport	GO:0072511	0.0347242	12	SLC30A9,WFS1,CACNA1H,PANX1,AHNAK,ATP2C1,TRPC6,CTNNB1,ITPR1,SRI,CEMIP,PSEN1
M2	cellular response to hormone stimulus	GO:0032870	0.0351691	13	ROCK2,UBR5,NCOA3,BMP4,NRIP1,CACNA1H,PTPN11,SFRP1,PPARG,AGTR1,TBC1D4,THRA,KAT5
M2	activation of protein kinase activity	GO:0032147	0.0351691	10	SHC1,MAP3K7,MALT1,BMP4,MDFIC,WNT5A,ITGB1BP1,DDX3X,PLCE1,VEGFA
M2	regulation of peptidase activity	GO:0052547	0.0361832	13	PSMB8,PSMB9,ROCK2,KLF4,TNFSF10,CASP8AP2,ROBO1,PLAUR,DDX3X,VEGFA,PPARG,SERPINE1,GPC3
M2	mesenchymal cell differentiation	GO:0048762	0.0361832	7	DAG1,PDPN,WWTR1,WNT5A,LOXL2,SFRP1,CTNNB1
M2	Wnt signaling pathway	GO:0016055	0.0364562	12	FZD4,MCC,UBR5,RAB5A,STRN,MDFIC,WNT5A,WWTR1,SFRP1,ROR1,DDX3X,CTNNB1
M2	positive regulation of MAP kinase activity	GO:0043406	0.0366659	8	SHC1,MAP3K7,ROBO1,BMP4,MDFIC,WNT5A,PLCE1,VEGFA
M2	formation of primary germ layer	GO:0001704	0.0366659	5	INHBA,BMP4,COL8A1,COL11A1,FN1
M2	mesenchymal to epithelial transition involved in metanephros morphogenesis	GO:0003337	0.0366659	2	LIF,BMP4
M2	epithelial cell differentiation involved in kidney development	GO:0035850	0.0366659	3	LIF,CD34,BMP4
M2	metanephric renal vesicle morphogenesis	GO:0072283	0.0366659	2	LIF,BMP4
M2	regulation of metanephros development	GO:0072215	0.0366659	2	LIF,BMP4
M2	head development	GO:0060322	0.0366659	7	MSX1,INHBA,BPTF,ROBO1,BMP4,WNT5A,PTPN11
M2	positive regulation of epithelial cell differentiation	GO:0030858	0.0366659	4	LIF,NCOA3,BMP4,SERPINE1
M2	positive regulation of protein serine/threonine kinase activity	GO:0071902	0.0366659	10	SHC1,MAP3K7,ROBO1,BMP4,MDFIC,WNT5A,DDX3X,VEGFA,PLCE1,CEMIP
M2	cell differentiation involved in kidney development	GO:0061005	0.0366659	3	LIF,CD34,BMP4
M2	SMAD protein signal transduction	GO:0060395	0.0366659	4	WWTR1,BMPR1A,BMP4,JUN
M2	renal vesicle morphogenesis	GO:0072077	0.0366659	2	LIF,BMP4
M2	kidney epithelium development	GO:0072073	0.0366659	4	LIF,CD34,BMP4,PECAM1
M2	renal vesicle development	GO:0072087	0.0366659	2	LIF,BMP4
M2	negative regulation of smooth muscle cell migration	GO:0014912	0.0366659	3	IGFBP5,BMPR1A,SERPINE1
M2	internal peptidyl-lysine acetylation	GO:0018393	0.0366659	8	MAP3K7,SGF29,AUTS2,LIF,KMT2A,NCOA3,ATF2,KAT5
M2	vascular wound healing	GO:0061042	0.0366659	2	CD34,SERPINE1
M2	angiogenesis involved in wound healing	GO:0060055	0.0366659	2	CD34,SERPINE1
M2	cell-cell signaling by wnt	GO:0198738	0.0366659	12	FZD4,MCC,UBR5,RAB5A,STRN,MDFIC,WNT5A,WWTR1,SFRP1,ROR1,DDX3X,CTNNB1
M2	regulation of core promoter binding	GO:1904796	0.0366659	2	CTNNB1,PSEN1
M2	regulation of fat cell differentiation	GO:0045598	0.0366659	4	GATA2,ZFPM2,WNT5A,SFRP1
M2	amyloid-beta metabolic process	GO:0050435	0.0366659	4	IDE,ROCK2,PSEN1,GSAP
M2	forebrain neuron differentiation	GO:0021879	0.0366659	2	INHBA,ROBO1
M2	forebrain generation of neurons	GO:0021872	0.0366659	2	INHBA,ROBO1
M2	negative regulation of cell migration involved in sprouting angiogenesis	GO:0090051	0.0366659	3	KLF4,ITGB1BP1,MEOX2
M2	negative regulation of cholesterol storage	GO:0010887	0.0366659	2	PPARG,NR1H3
M2	keratinocyte differentiation	GO:0030216	0.0366659	5	ROCK2,TXNIP,NCOA3,CLIC4,WNT5A
M2	regulation of protein kinase C activity	GO:1900019	0.0366659	2	WNT5A,CEMIP
M2	positive regulation of protein kinase C activity	GO:1900020	0.0366659	2	WNT5A,CEMIP
M2	negative regulation of protein K63-linked ubiquitination	GO:1900045	0.0366659	2	TRIP12,UBR5
M2	negative regulation of endothelial cell migration	GO:0010596	0.036927	5	DCN,KLF4,ITGB1BP1,PPARG,MEOX2
M2	Notch signaling pathway	GO:0007219	0.036927	5	GATA2,CD46,NOTCH2,ITGB1BP1,EGFL7
M2	cellular response to inorganic substance	GO:0071241	0.0378256	7	CDKN1B,TF,CLIC4,MEF2A,JUN,CACNA1H,WNT5A
M2	protein acetylation	GO:0006473	0.0381364	9	MAP3K7,SGF29,AUTS2,LIF,KMT2A,NCOA3,RAPGEF3,ATF2,KAT5
M2	Ras protein signal transduction	GO:0007265	0.0383154	8	SHOC2,PDPN,ROBO1,RAPGEF3,JUN,NOTCH2,AGTR1,PLCE1
M2	negative regulation of blood vessel endothelial cell migration	GO:0043537	0.0383154	4	KLF4,PPARG,ITGB1BP1,MEOX2
M2	calcium ion transport	GO:0006816	0.0383234	11	WFS1,CACNA1H,PANX1,AHNAK,ATP2C1,TRPC6,CTNNB1,ITPR1,SRI,CEMIP,PSEN1
M2	internal protein amino acid acetylation	GO:0006475	0.0398994	8	MAP3K7,SGF29,AUTS2,LIF,KMT2A,NCOA3,ATF2,KAT5
M2	positive regulation of apoptotic process	GO:0043065	0.0401992	15	RYBP,MSX1,TNFSF10,INHBA,CASP8AP2,ROBO1,BMP4,JUN,KLF11,PLAUR,SFRP1,DDX3X,ATM,CTNNB1,PPARG
M2	peptidyl-lysine acetylation	GO:0018394	0.0414587	8	MAP3K7,SGF29,AUTS2,LIF,KMT2A,NCOA3,ATF2,KAT5
M2	regulation of macrophage derived foam cell differentiation	GO:0010743	0.0414587	3	NFKBIA,CD36,PPARG
M2	regulation of cholesterol efflux	GO:0010874	0.0414587	3	NFKBIA,GPS2,NR1H3
M2	negative regulation of kinase activity	GO:0033673	0.0414832	9	CDKN1B,BMP4,IRAK3,WWTR1,DUSP1,DUSP10,ITGB1BP1,SOCS5,SH3BP5
M2	regulation of T cell differentiation	GO:0045580	0.0416883	4	BMP4,CD46,PNP,DUSP10
M2	mucopolysaccharide metabolic process	GO:1903510	0.0416883	4	CHSY1,CEMIP2,CEMIP,CSGALNACT1
M2	positive regulation of programmed cell death	GO:0043068	0.0424202	15	RYBP,MSX1,TNFSF10,INHBA,CASP8AP2,ROBO1,BMP4,JUN,KLF11,PLAUR,SFRP1,DDX3X,ATM,CTNNB1,PPARG
M2	positive regulation of I-kappaB kinase/NF-kappaB signaling	GO:0043123	0.0424202	7	S100A4,MAP3K7,TNFSF10,REL,TAB2,LPAR1,ROR1
M2	response to organonitrogen compound	GO:0010243	0.0430739	15	SEL1L,IGFBP5,WFS1,RAPGEF3,LDLR,PDE2A,CD36,PTPN11,SFRP1,GPIHBP1,AGTR1,TBC1D4,CTNNB1,PPARG,PSEN1
M2	regulation of chromatin organization	GO:1902275	0.0440892	7	AUTS2,UBR5,TPR,TRIP12,LIF,TLK1,VEGFA
M2	regulation of epithelial cell differentiation	GO:0030856	0.0442293	5	ROCK2,LIF,NCOA3,BMP4,SERPINE1
M2	regulation of extrinsic apoptotic signaling pathway via death domain receptors	GO:1902041	0.0453812	4	FAIM2,FEM1B,SFRP1,SERPINE1
M2	regulation of Notch signaling pathway	GO:0008593	0.0453812	4	GATA2,EGFL7,CD46,ITGB1BP1
M2	regulation of intracellular protein transport	GO:0033157	0.0457015	8	UBR5,TPR,RAPGEF3,BMP4,PDE2A,ITGB1BP1,CEMIP,PSEN1
M2	mesenchyme development	GO:0060485	0.0457466	7	DAG1,PDPN,WWTR1,WNT5A,LOXL2,SFRP1,CTNNB1
M2	nucleocytoplasmic transport	GO:0006913	0.0467417	9	NUP133,UBR5,TPR,RAPGEF3,MALT1,BMP4,PDE2A,XPOT,PSEN1
M2	nuclear transport	GO:0051169	0.0467417	9	NUP133,UBR5,TPR,RAPGEF3,MALT1,BMP4,PDE2A,XPOT,PSEN1
M2	cellular response to cytokine stimulus	GO:0071345	0.046894	14	EPOR,TNFRSF21,IRF1,ROBO1,IRAK3,AXL,PDE2A,WNT5A,CXCL12,SYNCRIP,SFRP1,NFKBIA,STAT6,PPARG
M2	hematopoietic progenitor cell differentiation	GO:0002244	0.046894	3	INHBA,BMP4,SFRP1
M2	positive regulation of vascular smooth muscle cell proliferation	GO:1904707	0.046894	3	IGFBP5,BMPR1A,JUN
M2	positive regulation of interleukin-2 production	GO:0032743	0.046894	3	MAP3K7,MALT1,RUNX1
M2	regulation of endopeptidase activity	GO:0052548	0.046894	12	PSMB8,PSMB9,ROCK2,KLF4,TNFSF10,CASP8AP2,ROBO1,PLAUR,DDX3X,VEGFA,PPARG,SERPINE1
M2	positive regulation of cytosolic calcium ion concentration involved in phospholipase C-activating G-protein coupled signaling pathway	GO:0051482	0.0482036	2	AGTR1,LPAR1
M2	regulation of mesenchymal cell proliferation	GO:0010464	0.0482036	2	WNT5A,BMP4
M2	glomerular mesangium development	GO:0072109	0.0482036	2	CD34,BMP4
M2	negative regulation of cellular response to hypoxia	GO:1900038	0.0482036	2	DDAH1,CD34
M2	cGMP-mediated signaling	GO:0019934	0.0482036	2	PDE2A,CD36
M2	negative regulation of sequestering of triglyceride	GO:0010891	0.0482036	2	PNPLA2,PPARG
M2	early endosome to late endosome transport	GO:0045022	0.0482036	4	STX8,RAB21,RAB5A,RDX
M2	negative regulation of leukocyte adhesion to vascular endothelial cell	GO:1904995	0.0482036	2	KLF4,CXCL12
M2	positive regulation of protein kinase C signaling	GO:0090037	0.0482036	2	WNT5A,VEGFA
M2	negative regulation of protein polyubiquitination	GO:1902915	0.0482036	2	TRIP12,UBR5
M2	histone H2A K63-linked ubiquitination	GO:0070535	0.0482036	2	TRIP12,UBR5
M2	positive regulation of maintenance of sister chromatid cohesion	GO:0034093	0.0482036	2	SMC5,SLF2
M2	positive regulation of maintenance of mitotic sister chromatid cohesion	GO:0034184	0.0482036	2	SMC5,SLF2
M2	positive regulation of NF-kappaB transcription factor activity	GO:0051092	0.0494328	7	MALT1,IRAK3,TRIM37,WNT5A,CD36,ROR1,CAPN3
M2	carbohydrate derivative catabolic process	GO:1901136	0.0502625	6	ENTPD4,PDE2A,CEMIP2,ENPP4,PNP,CEMIP
M2	ribonucleoside catabolic process	GO:0042454	0.0502625	3	ENPP4,PNP,ENTPD4
M2	negative regulation of cell adhesion	GO:0007162	0.0502625	8	KLF4,FZD4,RDX,BMP4,CXCL12,ITGB1BP1,GPNMB,SERPINE1
M2	metanephros development	GO:0001656	0.0502625	3	LIF,CD34,BMP4
M2	positive regulation of smooth muscle cell proliferation	GO:0048661	0.0502625	4	IGFBP5,BMPR1A,BMP4,JUN
M2	muscle cell migration	GO:0014812	0.0502625	4	IGFBP5,BMPR1A,THBS4,SERPINE1
M2	endodermal cell differentiation	GO:0035987	0.0502625	4	INHBA,FN1,COL11A1,COL8A1
M2	skin development	GO:0043588	0.0502625	6	ROCK2,TXNIP,INHBA,NCOA3,CLIC4,WNT5A
M2	positive regulation of epithelial to mesenchymal transition	GO:0010718	0.0502625	4	WWTR1,PDPN,LOXL2,CTNNB1
M2	body morphogenesis	GO:0010171	0.0502625	3	DAG1,PTPN11,MSX1
M2	regulation of stress-activated MAPK cascade	GO:0032872	0.0502625	8	MAP3K7,FKTN,MDFIC,WNT5A,DUSP10,MID1,GPS2,VEGFA
M2	regulation of stress-activated protein kinase signaling cascade	GO:0070302	0.0502625	8	MAP3K7,FKTN,MDFIC,WNT5A,DUSP10,MID1,GPS2,VEGFA
M2	positive regulation of cholesterol transport	GO:0032376	0.0502625	3	NFKBIA,GPS2,NR1H3
M2	positive regulation of sterol transport	GO:0032373	0.0502625	3	NFKBIA,GPS2,NR1H3
M2	positive regulation of intracellular transport	GO:0032388	0.0502625	7	RAB21,UBR5,TPR,RDX,RAPGEF3,CEMIP,PSEN1
M2	vesicle-mediated transport between endosomal compartments	GO:0098927	0.0502625	4	STX8,RAB21,RAB5A,RDX
M2	non-canonical Wnt signaling pathway	GO:0035567	0.0502625	3	FZD4,WNT5A,SFRP1
M2	cellular response to organonitrogen compound	GO:0071417	0.0514839	11	IGFBP5,RAPGEF3,PDE2A,CD36,PTPN11,SFRP1,AGTR1,TBC1D4,CTNNB1,PPARG,PSEN1
M2	regulation of sister chromatid segregation	GO:0033045	0.0514839	5	SMC5,TPR,SLF2,ATM,CTNNB1
M2	positive regulation of protein kinase activity	GO:0045860	0.0514839	13	SHC1,MAP3K7,ROBO1,MALT1,BMP4,TAB2,MDFIC,WNT5A,CEMIP,ITGB1BP1,DDX3X,PLCE1,VEGFA
M2	extrinsic apoptotic signaling pathway	GO:0097191	0.0528877	8	FEM1B,TNFSF10,INHBA,FAIM2,CASP8AP2,DDX3X,SFRP1,SERPINE1
M2	regulation of I-kappaB kinase/NF-kappaB signaling	GO:0043122	0.0528877	8	S100A4,MAP3K7,TNFSF10,REL,TAB2,LPAR1,ROR1,CAPN3
M2	positive regulation of receptor-mediated endocytosis	GO:0048260	0.0528877	4	TF,RAB21,SERPINE1,VEGFA
M2	protein import into nucleus	GO:0006606	0.0545075	5	UBR5,TPR,BMP4,PDE2A,PSEN1
M2	heart morphogenesis	GO:0003007	0.0545075	5	BMP4,NOTCH2,ZFPM2,NPY1R,TNNC1
M2	macrophage derived foam cell differentiation	GO:0010742	0.0554563	3	NFKBIA,CD36,PPARG
M2	foam cell differentiation	GO:0090077	0.0554563	3	NFKBIA,CD36,PPARG
M2	positive regulation of T cell differentiation	GO:0045582	0.0554563	3	CD46,PNP,DUSP10
M2	positive regulation of lipase activity	GO:0060193	0.0559029	4	GPIHBP1,NR1H3,AGTR1,LPAR1
M2	vascular process in circulatory system	GO:0003018	0.0559029	4	DDAH1,AGTR1,PDE2A,ITGB1BP1
M2	negative regulation of MAP kinase activity	GO:0043407	0.0559029	4	IRAK3,DUSP1,BMP4,DUSP10
M2	peptidyl-lysine modification	GO:0018205	0.0559029	12	AUTS2,SGF29,PLOD1,LIF,KMT2A,NCOA3,MAP3K7,ATF2,LOXL2,CAPN3,CTNNB1,KAT5
M2	endoderm formation	GO:0001706	0.0559029	4	INHBA,FN1,COL11A1,COL8A1
M2	endoderm development	GO:0007492	0.0559029	4	INHBA,FN1,COL11A1,COL8A1
M2	proteoglycan metabolic process	GO:0006029	0.0559029	4	CHSY1,CTNNB1,GLCE,CSGALNACT1
M2	response to lipid	GO:0033993	0.0566338	14	ROCK2,UBR5,NCOA3,BMP4,NRIP1,AXL,NR1H3,WNT5A,SERPINE1,SFRP1,PPARG,CTNNB1,KAT5,RBP4
M2	purine ribonucleoside catabolic process	GO:0046130	0.0566338	2	ENPP4,PNP
M2	purine nucleoside catabolic process	GO:0006152	0.0566338	2	ENPP4,PNP
M2	regulation of cell-substrate adhesion	GO:0010810	0.0566338	7	FZD4,CD36,SLK,ITGB1BP1,VEGFA,SERPINE1,FN1
M2	response to metal ion	GO:0010038	0.0566338	8	CDKN1B,TF,CLIC4,MEF2A,JUN,CACNA1H,LOXL2,WNT5A
M2	adherens junction organization	GO:0034332	0.0566338	5	RDX,SLK,ITGB1BP1,CTNNB1,VEGFA
M2	negative regulation of B cell activation	GO:0050869	0.0566338	2	ATM,SFRP1
M2	regulation of chromosome organization	GO:0033044	0.0566338	11	SMC5,AUTS2,UBR5,SLF2,LIF,TPR,TRIP12,TLK1,ATM,CTNNB1,VEGFA
M2	negative regulation of dendritic cell apoptotic process	GO:2000669	0.0566338	2	CXCL12,AXL
M2	post-embryonic development	GO:0009791	0.0566338	2	KLF4,BMP4
M2	mesenchymal to epithelial transition	GO:0060231	0.0566338	2	LIF,BMP4
M2	import into nucleus	GO:0051170	0.0566338	5	UBR5,TPR,BMP4,PDE2A,PSEN1
M2	negative regulation of protein sumoylation	GO:0033234	0.0566338	2	CAPN3,CTNNB1
M2	positive regulation of transforming growth factor beta production	GO:0071636	0.0566338	2	CD46,CD34
M2	positive regulation of establishment of protein localization	GO:1904951	0.0566338	11	MYOM1,UBR5,TPR,RAPGEF3,RBP4,PANX1,WNT5A,CD34,PTP4A3,CEMIP,PSEN1
M2	interleukin-2 secretion	GO:0070970	0.0566338	2	CD34,PNP
M2	lipoprotein transport	GO:0042953	0.0566338	2	CD36,PPARG
M2	lipoprotein localization	GO:0044872	0.0566338	2	CD36,PPARG
M2	cell communication by electrical coupling	GO:0010644	0.0566338	2	GJA1,SRI
M2	cellular response to low-density lipoprotein particle stimulus	GO:0071404	0.0566338	2	PPARG,LDLR
M2	positive regulation of protein import into nucleus, translocation	GO:0033160	0.0566338	2	UBR5,PSEN1
M2	protein localization to early endosome	GO:1902946	0.0566338	2	RDX,ROCK2
M2	regulation of protein localization to early endosome	GO:1902965	0.0566338	2	RDX,ROCK2
M2	regulation of protein localization to endosome	GO:1905666	0.0566338	2	RDX,ROCK2
M2	positive regulation of protein localization to early endosome	GO:1902966	0.0566338	2	RDX,ROCK2
M2	positive regulation of protein localization to endosome	GO:1905668	0.0566338	2	RDX,ROCK2
M2	positive regulation of T cell cytokine production	GO:0002726	0.0566338	2	MALT1,MAP3K7
M2	positive regulation of lipoprotein lipase activity	GO:0051006	0.0566338	2	GPIHBP1,NR1H3
M2	negative regulation of growth	GO:0045926	0.056915	7	CDKN1B,MSX1,INHBA,BMP4,NOTCH2,DDX3X,SFRP1
M2	nucleoside catabolic process	GO:0009164	0.0569922	3	ENPP4,PNP,ENTPD4
M2	nucleobase-containing small molecule catabolic process	GO:0034656	0.0569922	3	ENPP4,PNP,ENTPD4
M2	phospholipase C-activating G-protein coupled receptor signaling pathway	GO:0007200	0.0569922	3	AGTR1,PLCE1,LPAR1
M2	negative regulation of leukocyte apoptotic process	GO:2000107	0.0569922	3	CXCL12,BMP4,AXL
M2	positive regulation of endothelial cell migration	GO:0010595	0.0569922	6	GATA2,ROCK2,BMP4,WNT5A,ITGB1BP1,VEGFA
M2	regulation of cysteine-type endopeptidase activity	GO:2000116	0.0569922	9	PSMB9,KLF4,TNFSF10,CASP8AP2,ROBO1,PLAUR,DDX3X,PPARG,VEGFA
M2	regulation of sister chromatid cohesion	GO:0007063	0.0569922	3	SMC5,CTNNB1,SLF2
M2	positive regulation of Ras protein signal transduction	GO:0046579	0.0569922	3	ROBO1,SHOC2,NOTCH2
M2	cellular response to vascular endothelial growth factor stimulus	GO:0035924	0.0606275	4	DCN,ROBO1,ITGB1BP1,VEGFA
M2	positive regulation of nucleocytoplasmic transport	GO:0046824	0.0606275	4	RAPGEF3,TPR,UBR5,PSEN1
M2	stress-activated MAPK cascade	GO:0051403	0.062294	8	MAP3K7,FKTN,MDFIC,WNT5A,DUSP10,MID1,GPS2,VEGFA
M2	negative regulation of JNK cascade	GO:0046329	0.0631708	3	FKTN,GPS2,DUSP10
M2	positive regulation of small GTPase mediated signal transduction	GO:0051057	0.0631708	3	ROBO1,SHOC2,NOTCH2
M2	tissue remodeling	GO:0048771	0.0631708	3	GPNMB,NOTCH2,SFRP1
M2	regulation of adherens junction organization	GO:1903391	0.0638376	4	RDX,SLK,ITGB1BP1,VEGFA
M2	regulation of protein acetylation	GO:1901983	0.0638376	4	LIF,RAPGEF3,KAT5,AUTS2
M2	central nervous system development	GO:0007417	0.0660322	7	ANKLE2,INHBA,BPTF,ROBO1,BMP4,PTPN11,PSEN1
M2	positive regulation of cellular protein localization	GO:1903829	0.0660322	9	ROCK2,UBR5,TPR,LIF,RDX,RAPGEF3,KIF5B,CEMIP,PSEN1
M2	regulation of cell activation	GO:0050865	0.0665041	10	PDPN,BMP4,AXL,WNT5A,CD46,DUSP10,SFRP1,ATM,GPNMB,PNP
M2	positive regulation of kinase activity	GO:0033674	0.0665041	13	SHC1,MAP3K7,ROBO1,MALT1,BMP4,TAB2,MDFIC,WNT5A,VEGFA,ITGB1BP1,DDX3X,PLCE1,CEMIP
M2	regulation of cysteine-type endopeptidase activity involved in apoptotic process	GO:0043281	0.0666598	8	KLF4,TNFSF10,CASP8AP2,ROBO1,PLAUR,DDX3X,PPARG,VEGFA
M2	stress-activated protein kinase signaling cascade	GO:0031098	0.0666598	8	MAP3K7,FKTN,MDFIC,WNT5A,DUSP10,MID1,GPS2,VEGFA
M2	negative regulation of transferase activity	GO:0051348	0.0672339	9	CDKN1B,BMP4,IRAK3,WWTR1,DUSP1,DUSP10,ITGB1BP1,SOCS5,SH3BP5
M2	nervous system process	GO:0050877	0.0672339	11	COL2A1,TNFRSF21,WFS1,LDLR,ST3GAL4,COL11A1,ROR1,NF1,CLIC5,CEMIP,PSEN1
M2	endocytosis	GO:0006897	0.0672692	11	RAB21,TF,RAB5A,LDLR,AXL,NR1H3,CD36,VEGFA,PECAM1,RAB22A,SERPINE1
M2	regulation of pinocytosis	GO:0048548	0.0672692	2	AXL,NR1H3
M2	mesenchymal cell proliferation	GO:0010463	0.0672692	2	WNT5A,BMP4
M2	cardiac muscle cell development	GO:0055013	0.0672692	2	NEBL,BMP4
M2	cardiac cell development	GO:0055006	0.0672692	2	NEBL,BMP4
M2	metanephric nephron morphogenesis	GO:0072273	0.0672692	2	LIF,BMP4
M2	bicarbonate transport	GO:0015701	0.0672692	2	CA4,SLC4A4
M2	protein localization to cytoplasmic stress granule	GO:1903608	0.0672692	2	TIA1,DDX3X
M2	substrate-dependent cell migration	GO:0006929	0.0672692	2	ROBO1,FN1
M2	negative regulation of macrophage derived foam cell differentiation	GO:0010745	0.0672692	2	NFKBIA,PPARG
M2	memory	GO:0007613	0.0672692	2	LDLR,PSEN1
M2	maintenance of gastrointestinal epithelium	GO:0030277	0.0672692	2	MUC4,RBP4
M2	negative regulation of vascular permeability	GO:0043116	0.0672692	2	DDAH1,PDE2A
M2	positive regulation of early endosome to late endosome transport	GO:2000643	0.0672692	2	RDX,RAB21
M2	regulation of leukocyte adhesion to vascular endothelial cell	GO:1904994	0.0672692	2	KLF4,CXCL12
M2	glycosaminoglycan metabolic process	GO:0030203	0.0672692	4	CHSY1,CEMIP2,CEMIP,CSGALNACT1
M2	positive regulation of triglyceride lipase activity	GO:0061365	0.0672692	2	GPIHBP1,NR1H3
M2	chondroitin sulfate metabolic process	GO:0030204	0.0672692	2	CHSY1,CSGALNACT1
M2	chondroitin sulfate biosynthetic process	GO:0030206	0.0672692	2	CHSY1,CSGALNACT1
M2	monocyte differentiation	GO:0030224	0.0673076	3	BMP4,VEGFA,PPARG
M2	mononuclear cell differentiation	GO:1903131	0.0673076	3	BMP4,VEGFA,PPARG
M2	amyloid-beta formation	GO:0034205	0.0673076	3	ROCK2,PSEN1,GSAP
M2	cell-matrix adhesion	GO:0007160	0.0679186	7	ITGA10,CD36,SLK,ITGB1BP1,VEGFA,ITGA1,SERPINE1
M2	myeloid cell differentiation	GO:0030099	0.0684434	8	GATA2,INHBA,LIF,BMP4,NOTCH2,PPARG,RUNX1,VEGFA
M2	canonical Wnt signaling pathway	GO:0060070	0.0685684	9	FZD4,MCC,UBR5,RAB5A,WWTR1,WNT5A,DDX3X,SFRP1,CTNNB1
M2	positive regulation of MAPK cascade	GO:0043410	0.0686347	12	SHC1,MAP3K7,LIF,ROBO1,BMP4,MDFIC,WNT5A,PTPN11,NOTCH2,MID1,PLCE1,VEGFA
M2	regulation of signaling receptor activity	GO:0010469	0.0686347	10	PTN,INHBA,LIF,BMP4,CXCL12,VEGFA,CCL13,SOCS5,GPNMB,SERPINE1
M2	regulation of blood coagulation	GO:0030193	0.0695049	4	ENPP4,CD34,SERPINE1,PDPN
M2	regulation of hemostasis	GO:1900046	0.0695049	4	ENPP4,CD34,SERPINE1,PDPN
M2	histone ubiquitination	GO:0016574	0.0695049	4	TRIP12,RYBP,UBR5,TRIM37
M2	regulation of JUN kinase activity	GO:0043506	0.0695049	4	DUSP10,MDFIC,WNT5A,MAP3K7
M2	protein acylation	GO:0043543	0.0714978	9	MAP3K7,SGF29,AUTS2,LIF,KMT2A,NCOA3,RAPGEF3,ATF2,KAT5
M2	circulatory system process	GO:0003013	0.0715718	8	PDE2A,CD34,ITGB1BP1,DDAH1,AGTR1,PPARG,SRI,TNNC1
M2	blood circulation	GO:0008015	0.0715718	8	PDE2A,CD34,ITGB1BP1,DDAH1,AGTR1,PPARG,SRI,TNNC1
M2	regulation of epidermal cell differentiation	GO:0045604	0.0728446	3	NCOA3,ROCK2,BMP4
M2	vascular endothelial growth factor signaling pathway	GO:0038084	0.0728446	3	DCN,ROBO1,VEGFA
M2	regulation of translational initiation	GO:0006446	0.0728446	4	TPR,PPP1R15A,DDX3X,YTHDF3
M2	protein dephosphorylation	GO:0006470	0.0728446	8	ROCK2,ANKLE2,CTDSP1,DUSP1,PTPN11,DUSP10,ITGA1,PPP1R15A
M2	positive regulation of protein localization to nucleus	GO:1900182	0.0728446	4	LIF,TPR,UBR5,PSEN1
M2	negative regulation of sprouting angiogenesis	GO:1903671	0.0728446	3	KLF4,ITGB1BP1,MEOX2
M2	positive regulation of protein import into nucleus	GO:0042307	0.0728446	3	TPR,UBR5,PSEN1
M2	regulation of cell-matrix adhesion	GO:0001952	0.0729079	5	CD36,SLK,ITGB1BP1,VEGFA,SERPINE1
M2	regulation of extrinsic apoptotic signaling pathway	GO:2001236	0.0748414	6	FEM1B,TNFSF10,INHBA,FAIM2,SFRP1,SERPINE1
M2	neuron death	GO:0070997	0.0748414	6	FAIM2,WFS1,CD34,GPNMB,CTNNB1,MEOX2
M2	positive regulation of protein transport	GO:0051222	0.0748414	10	MYOM1,UBR5,TPR,RAPGEF3,RBP4,PANX1,WNT5A,CD34,CEMIP,PSEN1
M2	cell-substrate adhesion	GO:0031589	0.0748799	9	FZD4,ITGA10,CD36,SLK,ITGB1BP1,VEGFA,ITGA1,SERPINE1,FN1
M2	regulation of cell-cell adhesion	GO:0022407	0.0762113	9	KLF4,PDPN,RDX,BMP4,CD46,CXCL12,DUSP10,GPNMB,PNP
M2	regulation of mitotic sister chromatid segregation	GO:0033047	0.0762113	4	ATM,SMC5,TPR,SLF2
M2	positive regulation of chromosome organization	GO:2001252	0.0762113	7	SMC5,AUTS2,SLF2,LIF,TPR,ATM,VEGFA
M2	positive regulation of endocytosis	GO:0045807	0.0762113	5	RAB21,TF,AXL,VEGFA,SERPINE1
M2	dendritic cell apoptotic process	GO:0097048	0.0762113	2	CXCL12,AXL
M2	regulation of dendritic cell apoptotic process	GO:2000668	0.0762113	2	CXCL12,AXL
M2	regulation of ossification	GO:0030278	0.0762113	5	CHSY1,BMP4,BMPR1A,WNT5A,SFRP1
M2	positive regulation of SMAD protein signal transduction	GO:0060391	0.0762113	2	BMPR1A,BMP4
M2	positive regulation of kidney development	GO:0090184	0.0762113	2	LIF,BMP4
M2	calcium ion transmembrane transport	GO:0070588	0.0762113	8	CACNA1H,PANX1,AHNAK,ATP2C1,ITPR1,SRI,CEMIP,PSEN1
M2	receptor-mediated endocytosis	GO:0006898	0.0762113	7	RAB21,TF,RAB5A,LDLR,CD36,VEGFA,SERPINE1
M2	glomerular epithelium development	GO:0072010	0.0762113	2	CD34,PECAM1
M2	G1/S transition of mitotic cell cycle	GO:0000082	0.0762113	6	KLF4,CDKN1B,INHBA,KLF11,DDX3X,GPNMB
M2	negative regulation of translation	GO:0017148	0.0762113	5	IGFBP5,TPR,DDX3X,YTHDF3,SYNCRIP
M2	positive regulation of regulatory T cell differentiation	GO:0045591	0.0762113	2	CD46,DUSP10
M2	positive regulation of inflammatory response	GO:0050729	0.0762113	3	NFKBIA,WNT5A,SERPINE1
M2	regulation of cholesterol storage	GO:0010885	0.0762113	2	PPARG,NR1H3
M2	regulation of sequestering of triglyceride	GO:0010889	0.0762113	2	PNPLA2,PPARG
M2	positive regulation of cytoplasmic transport	GO:1903651	0.0762113	2	RDX,RAB21
M2	regulation of voltage-gated calcium channel activity	GO:1901385	0.0762113	2	AHNAK,SRI
M2	JUN phosphorylation	GO:0007258	0.0762113	4	DUSP10,MDFIC,WNT5A,MAP3K7
M2	regulation of protein kinase C signaling	GO:0090036	0.0762113	2	WNT5A,VEGFA
M2	regulation of maintenance of sister chromatid cohesion	GO:0034091	0.0762113	2	SMC5,SLF2
M2	regulation of maintenance of mitotic sister chromatid cohesion	GO:0034182	0.0762113	2	SMC5,SLF2
M2	regulation of protein K63-linked ubiquitination	GO:1900044	0.0762113	2	TRIP12,UBR5
M2	positive regulation of amyloid-beta formation	GO:1902004	0.0762113	2	ROCK2,GSAP
M2	positive regulation of triglyceride metabolic process	GO:0090208	0.0762113	2	PNPLA2,NR1H3
M2	positive regulation of sister chromatid cohesion	GO:0045876	0.0762113	2	SMC5,SLF2
M2	hyaluronan catabolic process	GO:0030214	0.0762113	2	CEMIP2,CEMIP
M2	ossification	GO:0001503	0.0771989	6	CHSY1,BMP4,BMPR1A,WNT5A,CLEC3B,SFRP1
M2	cellular response to nitrogen compound	GO:1901699	0.0775641	12	IGFBP5,RAPGEF3,BMP4,PDE2A,CD36,PTPN11,SFRP1,AGTR1,TBC1D4,CTNNB1,PPARG,PSEN1
M2	negative regulation of leukocyte cell-cell adhesion	GO:1903038	0.0775641	4	GPNMB,KLF4,CXCL12,BMP4
M2	regulation of leukocyte cell-cell adhesion	GO:1903037	0.0775641	7	KLF4,BMP4,CD46,CXCL12,DUSP10,GPNMB,PNP
M2	T cell differentiation	GO:0030217	0.0775641	4	BMP4,CD46,PNP,DUSP10
M2	regulation of coagulation	GO:0050818	0.0775641	4	ENPP4,CD34,SERPINE1,PDPN
M2	cytokine-mediated signaling pathway	GO:0019221	0.0781604	9	EPOR,ROBO1,IRAK3,AXL,WNT5A,CXCL12,NFKBIA,STAT6,PPARG
M2	regulation of small GTPase mediated signal transduction	GO:0051056	0.0784037	5	SHOC2,ROBO1,NOTCH2,CD2AP,PLCE1
M2	taxis	GO:0042330	0.0799633	10	ROBO1,BMP4,LPAR1,WNT5A,CXCL12,THBS4,CCL13,VEGFA,AGTR1,SERPINE1
M2	chemotaxis	GO:0006935	0.0799633	10	ROBO1,BMP4,LPAR1,WNT5A,CXCL12,THBS4,CCL13,VEGFA,AGTR1,SERPINE1
M2	purine-containing compound catabolic process	GO:0072523	0.0812452	3	PDE2A,ENPP4,PNP
M2	glycosyl compound catabolic process	GO:1901658	0.0812452	3	ENPP4,PNP,ENTPD4
M2	protein import into nucleus, translocation	GO:0000060	0.0812452	3	PDE2A,UBR5,PSEN1
M2	positive regulation of protein import	GO:1904591	0.0812452	3	TPR,UBR5,PSEN1
M2	regulation of lipase activity	GO:0060191	0.0813847	4	GPIHBP1,AGTR1,LPAR1,NR1H3
M2	negative regulation of lymphocyte activation	GO:0051250	0.0813847	4	ATM,GPNMB,BMP4,SFRP1
M2	cellular response to lipid	GO:0071396	0.0833965	11	ROCK2,UBR5,NCOA3,BMP4,NRIP1,AXL,NR1H3,WNT5A,SFRP1,KAT5,SERPINE1
M2	leukocyte cell-cell adhesion	GO:0007159	0.0836915	8	KLF4,BMP4,CD46,CXCL12,DUSP10,PECAM1,GPNMB,PNP
M2	lipid localization	GO:0010876	0.0836915	8	INHBA,LDLR,NR1H3,PNPLA2,CD36,NFKBIA,GPS2,PPARG
M2	regulation of leukocyte activation	GO:0002694	0.0848283	9	BMP4,AXL,WNT5A,CD46,DUSP10,SFRP1,ATM,GPNMB,PNP
M2	regulation of lymphocyte activation	GO:0051249	0.0855109	8	BMP4,AXL,CD46,DUSP10,SFRP1,ATM,GPNMB,PNP
M2	aminoglycan metabolic process	GO:0006022	0.0857415	4	CHSY1,CEMIP2,CEMIP,CSGALNACT1
M2	negative regulation of lymphocyte proliferation	GO:0050672	0.0859932	3	ATM,GPNMB,BMP4
M2	negative regulation of mononuclear cell proliferation	GO:0032945	0.0859932	3	ATM,GPNMB,BMP4
M2	negative regulation of cell cycle	GO:0045786	0.0859932	12	KLF4,CDKN1B,FEM1B,TPR,INHBA,ATF2,IRF1,BMP4,TRIM37,NOTCH2,ATM,GPNMB
M2	replicative senescence	GO:0090399	0.0859932	2	ATM,SERPINE1
M2	metanephros morphogenesis	GO:0003338	0.0859932	2	LIF,BMP4
M2	telencephalon development	GO:0021537	0.0859932	3	INHBA,ROBO1,BMP4
M2	regulation of interleukin-10 production	GO:0032653	0.0859932	3	CD46,CD34,TRIB2
M2	hematopoietic stem cell proliferation	GO:0071425	0.0859932	2	WNT5A,CD34
M2	regulation of cellular response to hypoxia	GO:1900037	0.0859932	2	DDAH1,CD34
M2	regulation of vascular endothelial growth factor signaling pathway	GO:1900746	0.0859932	2	DCN,ROBO1
M2	digestive system process	GO:0022600	0.0859932	3	MUC4,LDLR,RBP4
M2	regulation of regulatory T cell differentiation	GO:0045589	0.0859932	2	CD46,DUSP10
M2	epithelial structure maintenance	GO:0010669	0.0859932	2	MUC4,RBP4
M2	cardiac septum morphogenesis	GO:0060411	0.0859932	2	NOTCH2,ZFPM2
M2	regulation of homotypic cell-cell adhesion	GO:0034110	0.0859932	2	RDX,PDPN
M2	regulation of cGMP metabolic process	GO:0030823	0.0859932	2	WNT5A,VEGFA
M2	regulation of chromatin assembly or disassembly	GO:0001672	0.0859932	2	TLK1,TPR
M2	regulation of histone ubiquitination	GO:0033182	0.0859932	2	TRIP12,UBR5
M2	response to hypoxia	GO:0001666	0.0859962	7	PLOD1,PGK1,CD34,SFRP1,DDAH1,ITPR1,VEGFA
M2	response to decreased oxygen levels	GO:0036293	0.0859962	7	PLOD1,PGK1,CD34,SFRP1,DDAH1,ITPR1,VEGFA
M2	protein localization to nucleus	GO:0034504	0.0859962	7	UBR5,MSX1,LIF,TPR,BMP4,PDE2A,PSEN1
M2	regulation of apoptotic signaling pathway	GO:2001233	0.0864624	10	FEM1B,TNFSF10,INHBA,MSX1,FAIM2,PLAUR,CXCL12,SFRP1,DDX3X,SERPINE1
M2	maintenance of location	GO:0051235	0.0864633	8	DAG1,NR1H3,PNPLA2,CD36,NFKBIA,PPARG,SRI,CEMIP
M2	negative regulation of protein serine/threonine kinase activity	GO:0071901	0.0886184	5	CDKN1B,BMP4,IRAK3,DUSP1,DUSP10
M2	regulation of DNA binding	GO:0051101	0.0886184	5	JUN,PLAUR,CTNNB1,PPARG,PSEN1
M2	positive regulation of intracellular protein transport	GO:0090316	0.0886184	5	UBR5,TPR,RAPGEF3,CEMIP,PSEN1
M2	supramolecular fiber organization	GO:0097435	0.0887849	12	COL2A1,NEBL,NAV3,DES,RAPGEF3,LMOD1,RDX,LOXL2,SLK,LTBP2,CD2AP,PSEN1
M2	negative regulation of leukocyte proliferation	GO:0070664	0.0898605	3	ATM,GPNMB,BMP4
M2	regulation of organ morphogenesis	GO:2000027	0.0898605	3	LIF,CD34,BMP4
M2	positive regulation of pathway-restricted SMAD protein phosphorylation	GO:0010862	0.0898605	3	INHBA,BMPR1A,BMP4
M2	regulation of smooth muscle cell migration	GO:0014910	0.0898605	3	IGFBP5,BMPR1A,SERPINE1
M2	negative regulation of stress-activated MAPK cascade	GO:0032873	0.0898605	3	FKTN,GPS2,DUSP10
M2	negative regulation of stress-activated protein kinase signaling cascade	GO:0070303	0.0898605	3	FKTN,GPS2,DUSP10
M2	negative regulation of epithelial cell apoptotic process	GO:1904036	0.0898605	3	GATA2,WFS1,SERPINE1
M2	cellular response to cAMP	GO:0071320	0.0898605	3	IGFBP5,PDE2A,RAPGEF3
M2	positive regulation of protein dephosphorylation	GO:0035307	0.0898605	3	ITGA1,ANKLE2,PPP1R15A
M2	positive regulation of wound healing	GO:0090303	0.0898605	3	PDPN,ENPP4,SERPINE1
M2	positive regulation of response to wounding	GO:1903036	0.0898605	3	PDPN,ENPP4,SERPINE1
M2	negative regulation of cell-cell adhesion	GO:0022408	0.0900054	5	KLF4,RDX,BMP4,CXCL12,GPNMB
M2	cellular response to biotic stimulus	GO:0071216	0.0900054	6	TXNIP,AXL,NR1H3,WNT5A,CD36,SERPINE1
M2	regulation of calcium ion transport	GO:0051924	0.0900054	6	WFS1,AHNAK,TRPC6,CTNNB1,SRI,CEMIP
M2	regulation of JNK cascade	GO:0046328	0.0900054	6	MAP3K7,FKTN,MDFIC,WNT5A,DUSP10,GPS2
M2	regulation of lipid localization	GO:1905952	0.0900054	5	NR1H3,PNPLA2,NFKBIA,GPS2,PPARG
M2	import into cell	GO:0098657	0.0931748	11	RAB21,TF,RAB5A,LDLR,AXL,NR1H3,CD36,VEGFA,PECAM1,RAB22A,SERPINE1
M2	negative regulation of leukocyte activation	GO:0002695	0.0942005	4	ATM,GPNMB,BMP4,SFRP1
M2	adherens junction assembly	GO:0034333	0.0942005	4	CTNNB1,SLK,ITGB1BP1,VEGFA
M2	cyclic nucleotide metabolic process	GO:0009187	0.0942005	4	NPR1,PDE2A,WNT5A,VEGFA
M2	response to inorganic substance	GO:0010035	0.0944597	9	CDKN1B,TF,CLIC4,JUN,MEF2A,CACNA1H,LOXL2,WNT5A,STK26
M2	negative regulation of adherens junction organization	GO:1903392	0.0944597	2	RDX,ITGB1BP1
M2	negative regulation of mitotic cell cycle	GO:0045930	0.0944597	7	KLF4,CDKN1B,TPR,ATF2,BMP4,ATM,GPNMB
M2	regulation of chromosome segregation	GO:0051983	0.0944597	5	SMC5,TPR,SLF2,ATM,CTNNB1
M2	pinocytosis	GO:0006907	0.0944597	2	AXL,NR1H3
M2	brain development	GO:0007420	0.0944597	5	INHBA,BPTF,ROBO1,BMP4,PTPN11
M2	regulation of epidermis development	GO:0045682	0.0944597	3	NCOA3,ROCK2,BMP4
M2	regulation of kidney development	GO:0090183	0.0944597	2	LIF,BMP4
M2	regulation of histone modification	GO:0031056	0.0944597	5	AUTS2,UBR5,LIF,TRIP12,VEGFA
M2	interleukin-10 production	GO:0032613	0.0944597	3	CD46,CD34,TRIB2
M2	negative regulation of smooth muscle cell proliferation	GO:0048662	0.0944597	3	IGFBP5,CDKN1B,PPARG
M2	regulation of cellular response to vascular endothelial growth factor stimulus	GO:1902547	0.0944597	2	DCN,ROBO1
M2	regulatory T cell differentiation	GO:0045066	0.0944597	2	CD46,DUSP10
M2	face morphogenesis	GO:0060325	0.0944597	2	PTPN11,MSX1
M2	cardiac chamber morphogenesis	GO:0003206	0.0944597	3	TNNC1,NOTCH2,ZFPM2
M2	outflow tract morphogenesis	GO:0003151	0.0944597	2	ZFPM2,NPY1R
M2	cholesterol storage	GO:0010878	0.0944597	2	PPARG,NR1H3
M2	amyloid precursor protein catabolic process	GO:0042987	0.0944597	3	ROCK2,PSEN1,GSAP
M2	regulation of tissue remodeling	GO:0034103	0.0944597	2	GPNMB,SFRP1
M2	positive regulation of production of molecular mediator of immune response	GO:0002702	0.0944597	3	WNT5A,MALT1,MAP3K7
M2	activation of NF-kappaB-inducing kinase activity	GO:0007250	0.0944597	2	MALT1,MAP3K7
M2	positive regulation of amyloid precursor protein catabolic process	GO:1902993	0.0944597	2	ROCK2,GSAP
M2	glycosaminoglycan catabolic process	GO:0006027	0.0944597	2	CEMIP2,CEMIP
M2	cell cycle G1/S phase transition	GO:0044843	0.0959722	6	KLF4,CDKN1B,INHBA,KLF11,DDX3X,GPNMB
M2	cardiac muscle tissue development	GO:0048738	0.0964487	4	NEBL,BMP4,TNNC1,ZFPM2
M2	regulation of receptor-mediated endocytosis	GO:0048259	0.0964487	4	TF,RAB21,SERPINE1,VEGFA
M2	cellular response to decreased oxygen levels	GO:0036294	0.0980312	5	PGK1,CD34,SFRP1,DDAH1,VEGFA
M2	cellular response to hypoxia	GO:0071456	0.0980312	5	PGK1,CD34,SFRP1,DDAH1,VEGFA
M2	cell chemotaxis	GO:0060326	0.0986966	8	LPAR1,WNT5A,CXCL12,THBS4,CCL13,VEGFA,AGTR1,SERPINE1
M2	JNK cascade	GO:0007254	0.0986966	6	MAP3K7,FKTN,MDFIC,WNT5A,DUSP10,GPS2
M4	regulation of lipoprotein metabolic process	GO:0050746	0.0143968	3	RAB3GAP1,ITGAV,RAB3GAP2
M4	protein K11-linked deubiquitination	GO:0035871	0.0196452	3	YOD1,VCPIP1,USP37
M4	cytoplasmic mRNA processing body assembly	GO:0033962	0.0231465	3	CNOT6,DDX6,CNOT6L
M4	establishment of protein localization to endoplasmic reticulum membrane	GO:0097051	0.0236213	2	RAB3GAP1,RAB3GAP2
M4	macroautophagy	GO:0016236	0.0274733	8	RAB23,QSOX1,YOD1,RAB3GAP1,RAB3GAP2,WDFY3,UBQLN1,UBXN6
M4	positive regulation of organelle assembly	GO:1902117	0.0279376	5	CNOT6,RAB3GAP1,RAB3GAP2,CCDC88A,CNOT6L
M4	positive regulation of lipoprotein metabolic process	GO:0050747	0.0317544	2	RAB3GAP1,RAB3GAP2
M4	regulation of protein lipidation	GO:1903059	0.0317544	2	RAB3GAP1,RAB3GAP2
M4	positive regulation of protein lipidation	GO:1903061	0.0317544	2	RAB3GAP1,RAB3GAP2
M4	positive regulation of endoplasmic reticulum tubular network organization	GO:1903373	0.0317544	2	RAB3GAP1,RAB3GAP2
M4	regulation of peroxisome proliferator activated receptor signaling pathway	GO:0035358	0.0317544	2	ASXL2,LMO3
M4	positive regulation of peroxisome proliferator activated receptor signaling pathway	GO:0035360	0.0317544	2	ASXL2,LMO3
M4	positive regulation of cytoplasmic mRNA processing body assembly	GO:0010606	0.0317544	2	CNOT6,CNOT6L
M4	positive regulation of fat cell differentiation	GO:0045600	0.0320486	3	ASXL2,LMO3,SFRP2
M4	glycerolipid metabolic process	GO:0046486	0.0333819	9	FAM126A,SMG1,GPAM,ABHD16A,MTMR6,PIP4P1,INPP5F,SELENOI,FAR1
M4	plasma membrane tubulation	GO:0097320	0.0347242	3	WHAMM,PACSIN1,CAVIN2
M4	phosphatidylinositol dephosphorylation	GO:0046856	0.0347242	3	PIP4P1,MTMR6,INPP5F
M4	autophagy	GO:0006914	0.0366659	11	RAB23,YOD1,QSOX1,TRIM65,UBQLN1,RAB3GAP1,RAB3GAP2,WDFY3,BMF,UBXN6,VPS13A
M4	process utilizing autophagic mechanism	GO:0061919	0.0366659	11	RAB23,YOD1,QSOX1,TRIM65,UBQLN1,RAB3GAP1,RAB3GAP2,WDFY3,BMF,UBXN6,VPS13A
M4	response to sterol	GO:0036314	0.0366659	3	LRP6,RORC,TGFBR1
M4	regulation of endoplasmic reticulum tubular network organization	GO:1903371	0.0382847	2	RAB3GAP1,RAB3GAP2
M4	anion transmembrane transport	GO:0098656	0.0482036	8	GOPC,SLC37A1,WNK1,SLC26A2,ANO2,SLC35B4,ANO5,LRRC8B
M4	inorganic anion transmembrane transport	GO:0098661	0.0482036	5	SLC37A1,WNK1,SLC26A2,ANO2,ANO5
M4	regulation of cytoplasmic mRNA processing body assembly	GO:0010603	0.0482036	2	CNOT6,CNOT6L
M4	regulation of organelle assembly	GO:1902115	0.0502625	7	CNOT6,CCSAP,CEP97,RAB3GAP1,RAB3GAP2,CCDC88A,CNOT6L
M4	inorganic anion transport	GO:0015698	0.0506199	6	GOPC,SLC37A1,WNK1,SLC26A2,ANO2,ANO5
M4	phospholipid dephosphorylation	GO:0046839	0.0512049	3	PIP4P1,MTMR6,INPP5F
M4	peptidyl-serine phosphorylation	GO:0018105	0.0528877	8	TGFBR1,SMG1,TTBK2,FNIP1,RICTOR,MAPK1,UHMK1,CLSPN
M4	chondroitin sulfate metabolic process	GO:0030204	0.0559029	2	CHST11,CHST7
M4	chondroitin sulfate biosynthetic process	GO:0030206	0.0559029	2	CHST11,CHST7
M4	aggrephagy	GO:0035973	0.0559029	2	WDFY3,UBQLN1
M4	glycerophospholipid metabolic process	GO:0006650	0.0566338	7	FAM126A,SMG1,MTMR6,PIP4P1,INPP5F,SELENOI,FAR1
M4	protein deubiquitination	GO:0016579	0.0591004	6	USP31,YOD1,OTUD1,USP45,VCPIP1,USP37
M4	regulation of telomere maintenance	GO:0032204	0.0616902	5	SMG1,DHX36,ERCC4,MAPK1,TNKS2
M4	regulation of telomere capping	GO:1904353	0.0616902	3	ERCC4,MAPK1,TNKS2
M4	protein localization to endoplasmic reticulum	GO:0070972	0.0616902	3	RAB3GAP1,HSPA5,RAB3GAP2
M4	peptidyl-serine modification	GO:0018209	0.0631708	8	TGFBR1,SMG1,TTBK2,FNIP1,RICTOR,MAPK1,UHMK1,CLSPN
M4	cellular response to sterol	GO:0036315	0.0631708	2	LRP6,RORC
M4	peroxisome proliferator activated receptor signaling pathway	GO:0035357	0.0631708	2	ASXL2,LMO3
M4	autophagosome assembly	GO:0000045	0.0695049	4	RAB23,RAB3GAP1,UBQLN1,RAB3GAP2
M4	positive regulation of autophagosome assembly	GO:2000786	0.0711285	2	RAB3GAP1,RAB3GAP2
M4	regulation of fat cell differentiation	GO:0045598	0.0728446	3	ASXL2,LMO3,SFRP2
M4	autophagosome organization	GO:1905037	0.0728446	4	RAB23,RAB3GAP1,UBQLN1,RAB3GAP2
M4	phosphatidylinositol metabolic process	GO:0046488	0.0748414	5	SMG1,MTMR6,INPP5F,PIP4P1,FAM126A
M4	phospholipid metabolic process	GO:0006644	0.0748414	7	FAM126A,SMG1,MTMR6,PIP4P1,INPP5F,SELENOI,FAR1
M4	protein K48-linked deubiquitination	GO:0071108	0.0762113	3	YOD1,VCPIP1,USP37
M4	positive regulation of protein complex assembly	GO:0031334	0.0769369	7	CNOT6,FER,TPPP,WHAMM,FNIP1,BCLAF1,CNOT6L
M4	cyclic nucleotide catabolic process	GO:0009214	0.0775641	2	PDE4D,PDE5A
M4	protein modification by small protein removal	GO:0070646	0.0775641	6	USP31,YOD1,OTUD1,USP45,VCPIP1,USP37
M4	positive regulation of vacuole organization	GO:0044090	0.0775641	2	RAB3GAP1,RAB3GAP2
M4	negative regulation of extrinsic apoptotic signaling pathway	GO:2001237	0.0781604	4	BIRC6,PELI3,ITGAV,TGFBR1
M4	vacuole organization	GO:0007033	0.0783247	5	HOOK1,RAB23,RAB3GAP1,RAB3GAP2,UBQLN1
M4	regulation of DNA metabolic process	GO:0051052	0.0831493	10	RAD52,SMG1,DHX36,TNKS2,ABRAXAS1,FGF10,ZBTB38,ERCC4,MAPK1,USP37
M4	fibroblast growth factor receptor signaling pathway	GO:0008543	0.084129	3	DSTYK,FRS2,FGF10
M4	mitochondrial transmembrane transport	GO:1990542	0.084129	3	PNPT1,MRS2,SLC25A23
M4	lipoprotein metabolic process	GO:0042157	0.0848283	4	ZDHHC20,RAB3GAP1,ITGAV,RAB3GAP2
M4	negative regulation of striated muscle cell differentiation	GO:0051154	0.0859932	2	FRS2,HDAC5
M4	chondroitin sulfate proteoglycan metabolic process	GO:0050654	0.0859932	2	CHST11,CHST7
M4	chondroitin sulfate proteoglycan biosynthetic process	GO:0050650	0.0859932	2	CHST11,CHST7
M4	cellular response to oxygen levels	GO:0071453	0.0860683	5	CPEB2,MDM4,PDK1,ATP6V0A2,UBQLN1
M4	telomere capping	GO:0016233	0.0864633	3	ERCC4,MAPK1,TNKS2
M4	lamellipodium assembly	GO:0030032	0.0864633	3	CCDC88A,FER,WHAMM
M4	positive regulation of canonical Wnt signaling pathway	GO:0090263	0.0889835	4	LRP6,WNK1,TBL1XR1,TNKS2
M4	regulation of transforming growth factor beta receptor signaling pathway	GO:0017015	0.0907598	4	LEMD3,CD109,CDKN2B,PRDM16
M4	endomembrane system organization	GO:0010256	0.0931748	8	HOOK1,WHAMM,PACSIN1,REEP3,ARHGAP21,RAB3GAP1,CAVIN2,RAB3GAP2
M4	response to cholesterol	GO:0070723	0.0931748	2	LRP6,TGFBR1
M4	establishment of protein localization to endoplasmic reticulum	GO:0072599	0.0931748	2	RAB3GAP1,RAB3GAP2
M4	regulation of cellular response to transforming growth factor beta stimulus	GO:1903844	0.0942005	4	LEMD3,CD109,CDKN2B,PRDM16
M4	cell cycle arrest	GO:0007050	0.0944597	5	TBRG1,CDKN2B,PNPT1,FGF10,UHMK1
M4	transforming growth factor beta receptor signaling pathway	GO:0007179	0.0980312	5	TGFBR1,CDKN2B,LEMD3,PRDM16,CD109
M4	positive regulation of cellular component biogenesis	GO:0044089	0.0990428	10	CNOT6,FER,TPPP,WHAMM,FNIP1,BCLAF1,RAB3GAP1,RAB3GAP2,CCDC88A,CNOT6L
M3	insulin secretion involved in cellular response to glucose stimulus	GO:0035773	0.00895278	3	BAIAP3,ANO1,STXBP4
M3	regulation of insulin secretion involved in cellular response to glucose stimulus	GO:0061178	0.00895278	3	BAIAP3,ANO1,STXBP4
M3	lactation	GO:0007595	0.0103042	2	CSN3,CSN2
M3	regulation of insulin secretion	GO:0050796	0.0156856	4	BAIAP3,ANO1,REST,STXBP4
M3	insulin secretion	GO:0030073	0.0211376	4	BAIAP3,ANO1,REST,STXBP4
M3	regulation of peptide hormone secretion	GO:0090276	0.0263512	4	BAIAP3,ANO1,REST,STXBP4
M3	cellular response to hexose stimulus	GO:0071331	0.0263512	3	BAIAP3,ANO1,STXBP4
M3	cellular response to glucose stimulus	GO:0071333	0.0263512	3	BAIAP3,ANO1,STXBP4
M3	cellular response to monosaccharide stimulus	GO:0071326	0.0263512	3	BAIAP3,ANO1,STXBP4
M3	extracellular matrix organization	GO:0030198	0.0279376	4	MMP13,CHADL,COL11A2,CMA1
M3	cellular glucose homeostasis	GO:0001678	0.0279376	3	BAIAP3,ANO1,STXBP4
M3	kidney epithelium development	GO:0072073	0.0281755	3	KLHL3,ROBO2,FOXJ1
M3	cellular response to carbohydrate stimulus	GO:0071322	0.0281755	3	BAIAP3,ANO1,STXBP4
M3	positive regulation of insulin secretion involved in cellular response to glucose stimulus	GO:0035774	0.0281755	2	BAIAP3,ANO1
M3	mRNA transcription by RNA polymerase II	GO:0042789	0.0322574	2	SOX17,SOX18
M3	peptide hormone secretion	GO:0030072	0.0333819	4	BAIAP3,ANO1,REST,STXBP4
M3	response to glucose	GO:0009749	0.0369054	3	BAIAP3,ANO1,STXBP4
M3	renal system development	GO:0072001	0.0383154	4	SOX17,KLHL3,ROBO2,FOXJ1
M3	response to hexose	GO:0009746	0.0383154	3	BAIAP3,ANO1,STXBP4
M3	response to monosaccharide	GO:0034284	0.0383154	3	BAIAP3,ANO1,STXBP4
M3	urogenital system development	GO:0001655	0.0414587	4	SOX17,KLHL3,ROBO2,FOXJ1
M3	acetyl-CoA biosynthetic process	GO:0006085	0.0430739	2	ACSS1,PDK4
M3	acyl-CoA biosynthetic process	GO:0071616	0.0430739	2	ACSS1,PDK4
M3	thioester biosynthetic process	GO:0035384	0.0430739	2	ACSS1,PDK4
M3	response to carbohydrate	GO:0009743	0.0470723	3	BAIAP3,ANO1,STXBP4
M3	regulation of hormone secretion	GO:0046883	0.0477669	4	BAIAP3,ANO1,REST,STXBP4
M3	collagen fibril organization	GO:0030199	0.0481469	2	CHADL,COL11A2
M3	regulation of vascular permeability	GO:0043114	0.0481469	2	RAMP2,MYLK3
M3	tube development	GO:0035295	0.0482036	8	KLHL3,SOX18,ESM1,ROBO2,ALDH1A2,RAMP2,VASH2,FOXJ1
M3	acetyl-CoA metabolic process	GO:0006084	0.0502625	2	ACSS1,PDK4
M3	ureteric bud development	GO:0001657	0.0502625	2	ROBO2,FOXJ1
M3	aerobic respiration	GO:0009060	0.0502625	2	AFG1L,CBFA2T3
M3	body fluid secretion	GO:0007589	0.0502625	2	CSN3,CSN2
M3	mRNA transcription	GO:0009299	0.0502625	2	SOX17,SOX18
M3	glucose homeostasis	GO:0042593	0.0528877	3	BAIAP3,ANO1,STXBP4
M3	carbohydrate homeostasis	GO:0033500	0.0528877	3	BAIAP3,ANO1,STXBP4
M3	mesonephric tubule development	GO:0072164	0.0554563	2	ROBO2,FOXJ1
M3	mesonephric epithelium development	GO:0072163	0.0554563	2	ROBO2,FOXJ1
M3	extracellular structure organization	GO:0043062	0.0569922	4	MMP13,CHADL,COL11A2,CMA1
M3	hormone secretion	GO:0046879	0.0569922	4	BAIAP3,ANO1,REST,STXBP4
M3	positive regulation of insulin secretion	GO:0032024	0.0616902	2	BAIAP3,ANO1
M3	hormone transport	GO:0009914	0.0631708	4	BAIAP3,ANO1,REST,STXBP4
M3	mesonephros development	GO:0001823	0.0660322	2	ROBO2,FOXJ1
M3	regulation of coenzyme metabolic process	GO:0051196	0.0660322	2	PDK4,CBFA2T3
M3	signal release	GO:0023061	0.0686347	4	BAIAP3,ANO1,REST,STXBP4
M3	negative regulation of chemotaxis	GO:0050922	0.0688236	2	C5AR2,ROBO2
M3	kidney morphogenesis	GO:0060993	0.0728446	2	KLHL3,FOXJ1
M3	mammary gland development	GO:0030879	0.0728446	2	CSN3,CSN2
M3	purine ribonucleotide metabolic process	GO:0009150	0.0762113	5	PDE1B,MYH7,RAMP2,AFG1L,CBFA2T3
M3	kidney development	GO:0001822	0.0772445	3	KLHL3,ROBO2,FOXJ1
M3	ribonucleotide metabolic process	GO:0009259	0.0775641	5	PDE1B,MYH7,RAMP2,AFG1L,CBFA2T3
M3	purine nucleotide metabolic process	GO:0006163	0.0811472	5	PDE1B,MYH7,RAMP2,AFG1L,CBFA2T3
M3	ribose phosphate metabolic process	GO:0019693	0.0834404	5	PDE1B,MYH7,RAMP2,AFG1L,CBFA2T3
M3	coenzyme biosynthetic process	GO:0009108	0.0859865	3	ACSS1,PDK4,CBFA2T3
M3	extracellular matrix disassembly	GO:0022617	0.0860683	2	MMP13,CMA1
M3	nephron epithelium development	GO:0072009	0.0898605	2	KLHL3,FOXJ1
M3	regulation of cofactor metabolic process	GO:0051193	0.0898605	2	PDK4,CBFA2T3
M3	cAMP metabolic process	GO:0046058	0.0898605	2	PDE1B,RAMP2
M3	positive regulation of peptide hormone secretion	GO:0090277	0.0942005	2	BAIAP3,ANO1
M3	centriole replication	GO:0007099	0.0966585	2	CCP110,WDR62
M3	purine-containing compound metabolic process	GO:0072521	0.0990428	5	PDE1B,MYH7,RAMP2,AFG1L,CBFA2T3
SOURCE	TARGET	WEIGHT
TMOD4	DLX5	0.224496
ADCY4	SEMA3G	0.434012
ENTPD7	ZNF691	0.437425
C11orf68	ACSS1	0.198564
C14orf93	SLC29A4	0.21283
ST8SIA6	SLC27A3	0.256573
APPL2	UBXN7	0.622467
DDI2	MMP13	0.162983
LSAMP	CYYR1	0.271629
C1QTNF12	ST8SIA6	0.158159
ROBO2	CLEC5A	0.0972457
SLC35F1	FAM169A	0.226826
NDP	NDUFA4L2	0.175967
SYTL3	KLHL41	0.256518
TMOD4	MYLK3	0.399724
SYTL3	ST8SIA6	0.26807
SLC25A48	CBFA2T3	0.123415
TP73	ST8SIA6	0.136915
ACSS1	CORO6	0.410572
ARHGAP6	AFG1L	0.302652
ZNF35	STXBP4	0.200184
LSP1	CORO6	0.181204
CHADL	METTL22	0.14643
SYTL3	ACSS1	0.306839
DGKE	ST8SIA6	0.19307
XPNPEP2	DISC1	0.171035
ITIH3	ABCA3	0.27594
FABP3	ALDH1A2	0.264958
SLC35F1	ACSS1	0.310806
PTH1R	ANO1	0.239422
SEMA3B	UBXN7	0.376566
ROBO2	DDI2	0.264727
DISC1	GCOM1	0.380464
KAT8	TNFRSF14	0.465866
SYTL3	ISLR	0.179499
NDUFA4L2	ZNF333	0.377713
ACSS1	ENO3	0.222304
ADCY4	CACNA1I	0.223774
GTF3C4	TSKS	0.206139
ENTPD7	LRFN4	0.365025
PDK4	ADCY4	0.490731
ST8SIA6	PANK3	0.194558
DDI2	SLC43A1	0.180201
LSAMP	RALGDS	0.264388
WNK3	NEMF	0.206629
PLEKHA8	ZNF333	0.214679
GLDC	RFTN2	0.217852
CSN1S1	MCOLN1	0.114051
ARMH4	CHST1	0.148167
CYP7B1	DISC1	0.172298
ALDH1A2	CATSPER2	0.281307
ACSS1	CHRDL1	0.21613
DENND1B	SPTB	0.218815
SH2D3C	ST8SIA6	0.200299
CADPS	RFTN2	0.321427
HUNK	NOSTRIN	0.217457
ZNF692	ST8SIA6	0.170729
PLA1A	UBXN1	0.190538
RALGDS	PDE1B	0.224975
AADAT	LRIG2	0.311983
FABP3	BTN1A1	0.212503
DENND1B	MMP17	0.139481
DENND1B	TMEM266	0.213521
COL11A2	MCOLN1	0.355572
MED8	CSN2	0.17579
SLC12A8	CNTNAP5	0.172525
IGDCC4	UBXN7	0.20835
LRIG2	WDR62	0.578173
KAT8	MATN3	0.207471
ST8SIA6	ESM1	0.101843
TANC2	GCOM1	0.345347
PLEKHA4	ST8SIA6	0.242566
AFG1L	APBB1	0.140609
LIN54	KLHL41	0.217842
KLHL3	DISC1	0.327299
AADAT	DOCK10	0.193378
UBXN1	ALOX15	0.170055
SHANK1	ST8SIA6	0.135387
KAT8	WDR7	0.222653
CSN3	APOL5	0.198176
ERO1B	PCYT1B	0.321613
METTL22	CORO6	0.282091
APPL2	SOX17	0.1514
DISC1	ACTR2	0.253012
ADCY4	SCN4A	0.129788
ZNF248	DISC1	0.25575
CADPS	NRIP2	0.198127
SYNE3	ST8SIA6	0.170632
MMRN1	HOMER1	0.134694
AADAT	CKM	0.257894
CCDC107	GCOM1	0.300053
WISP2	HOMER1	0.229951
ZKSCAN8	ABCA3	0.238223
HOMER1	DISC1	0.542235
HLF	PYGM	0.24473
LSAMP	DTX2	0.262919
KIF24	CORO6	0.146965
ARMH4	REEP2	0.346272
WNK3	CADPS	0.320356
CYYR1	TNN	0.229098
STXBP4	ST8SIA6	0.226141
ST8SIA6	TMEM179B	0.231906
APPL2	SLC29A4	0.351116
NOSTRIN	ZNF10	0.272182
TIGD1	SLC29A4	0.276846
TIGD1	ANAPC2	0.139411
ZFP2	ST8SIA6	0.136861
FBXL14	DENND1B	0.375943
MED8	VASH2	0.251366
SPP2	LRFN4	0.201278
C1QTNF12	C16orf95	0.117093
CYP20A1	BAIAP3	0.237725
ROBO2	CADPS	0.337374
MYH7	GLDC	0.186572
ZNF691	CABP1	0.239961
ARHGAP17	DISC1	0.456993
DDI2	SOX18	0.198239
UBXN1	GPATCH3	0.149786
C5AR2	ST8SIA6	0.176257
ERO1B	CCP110	0.226383
PCYT1B	ZNF10	0.416241
MED8	HELB	0.285945
SEMA4G	AFAP1	0.29032
LSAMP	ZNF571	0.247709
NAXD	SLC9A7	0.22506
SLC26A10	DISC1	0.165699
UBXN1	SEMA3G	0.209235
ARHGAP17	ERCC6	0.319911
REST	TNFRSF14	0.211463
ACSS1	TPPP3	0.28733
SLC13A1	ALDH1A2	0.216938
KIAA0895	CNTNAP5	0.334929
ALDH1A2	ADAMTS4	0.152689
PDZK1IP1	CBFA2T3	0.250437
CNKSR1	CNTNAP5	0.165766
FOXJ1	CATSPER2	0.171533
SULT4A1	CLOCK	0.365379
LSAMP	PPARGC1B	0.196277
CMA1	LALBA	0.174696
NAXD	CATSPER2	0.469224
TSKS	ADGRA3	0.186465
KLHL3	RAMP2	0.300444
PNPT1	CLCN5	0.743168
TBC1D8B	PCYOX1	0.718699
RCAN3	CPEB2	0.871714
PBRM1	OGFRL1	0.797024
DOCK5	CPEB4	0.878555
BMP2K	HDAC5	0.827711
MARS2	FAM208B	0.730128
ZBTB41	ERCC4	0.840488
RASA2	UHMK1	0.85323
CNRIP1	TOX	0.68402
USP45	VPS13A	0.698079
MUM1L1	SFRP2	0.640797
TPM3	BOLA3	0.669536
CNOT6	HMCN2	0.437621
DELE1	SH3RF3	0.641893
WDPCP	MDM4	0.367696
TMEM241	GNG2	0.527104
LYSMD2	ITIH4	0.858633
CPD	ZBTB46	0.537474
IRF2BP2	FER	0.486637
MIB1	CREBRF	0.754683
DOCK5	NUFIP2	0.889147
ZNF654	ZSWIM6	0.701279
QSOX1	ZC3H12C	0.906389
ABRAXAS1	IRF2BP2	0.610076
ANGPTL4	FAR1	0.815536
SPRYD3	PLEKHG6	0.302005
MDM4	NUFIP2	0.815481
DOCK5	ALDH1L2	0.573059
CASC4	INTS11	0.737891
TET3	MRS2	0.47846
TEAD1	TET3	0.4372
CPXM2	MRAS	0.678859
UBQLN1	C6orf203	0.751072
VCPIP1	KLHL42	0.676099
RIPOR3	CPEB2	0.612636
CAND1	FGF10	0.544824
PDZD8	CPD	0.591517
MEX3A	KLHL24	0.701202
EPM2AIP1	ERCC4	0.797897
MTMR6	ATP5S	0.800638
PIP4P1	PCYOX1	0.807873
UGT8	CPD	0.737755
ITGAV	ATP5S	0.775674
LEMD3	SCRN3	0.557175
ZSWIM6	ERBIN	0.715492
CNOT6L	CBL	0.892995
SMAD5	CCNDBP1	0.84955
SSBP3	CDC26	0.698946
ATP5S	MAPK1	0.908843
ETFBKMT	PCYOX1	0.38523
NUFIP2	PRDM16	0.585401
AFF4	LMBRD2	0.634218
GALM	HOXD8	0.631552
BMPR1B	UGGT1	0.762739
ZSWIM6	RALGAPB	0.550434
TBL1XR1	LONRF3	0.415203
CPEB4	C16orf72	0.86527
USP37	SKIL	0.625796
GALNT18	EML4	0.745451
SUPT20H	PDE4D	0.894355
SUPT20H	ZKSCAN1	0.597483
ZNF592	COG6	0.621548
SSBP3	FNDC3B	0.782231
SLC2A13	CHST11	0.551808
PRKAR2A	FAM208B	0.793861
PARP6	LRP2	0.481431
SMAD5	AVL9	0.869704
PRKAR2A	CCSAP	0.624201
GOPC	VPS13A	0.759928
USP31	STARD9	0.484982
CNOT6L	TMEM181	0.533849
LMO3	RICTOR	0.654426
SLC22A3	TRIM63	0.415751
BTAF1	RBM25	0.489877
CNOT6L	ATG2B	0.833303
MGA	MAPK1	0.774162
DOCK5	LGALS12	0.676086
TMTC3	COL12A1	0.784995
ABL2	IRF2BP2	0.879053
AFF4	ZSWIM6	0.881742
SMAD5	QKI	0.92132
SMAD5	HEATR5B	0.809201
UGGT1	MAPK1	0.914903
TRIM45	CMYA5	0.585871
VPS13B	SECISBP2	0.938136
RBM25	MIB1	0.872673
MIB1	TPPP	0.494797
KLHL24	GNA13	0.931787
TMEM245	ZBTB4	0.824511
EEPD1	HOXD8	0.777295
AFAP1L1	FNDC3B	0.842365
CGGBP1	KDM3A	0.51023
PNPT1	YPEL3	0.822229
UBQLN1	SCRN3	0.751506
EDIL3	BTNL9	0.696081
CD109	VEPH1	0.414425
CGGBP1	ITCH	0.955531
PARP6	MRAS	0.763263
HOOK1	ZHX1	0.769156
CNOT6L	CAND1	0.747898
VPS13B	ZNF24	0.85581
CNOT6L	PELI3	0.556946
CMYA5	CRTC2	0.568259
LRP6	IRF2BP2	0.896288
NCKAP5	ZNF770	0.51655
ATP5S	TNKS2	0.766507
SLC22A3	PPM1K	0.35216
CGGBP1	CCDC88A	0.742579
PRKAR2A	FAM160B1	0.870188
DCP1B	AFF4	0.839212
TMTC3	TBRG1	0.812472
CPEB2	LARP6	0.913592
HSPA12B	CDC26	0.513661
QKI	SLC1A7	0.644778
ERCC4	SLC25A26	0.750073
FAM126A	CGNL1	0.867106
SPTY2D1	UBQLN1	0.443141
GALNT18	ADCYAP1R1	0.722539
SMTNL2	FAU	0.649002
TBL1XR1	RNF145	0.800648
KLHL5	NAPRT	0.845931
SMAD5	VPS13A	0.854547
KLHL24	QKI	0.875405
UBXN6	FNDC3B	0.720571
GRTP1	ZNF77	0.719636
LRP6	TFDP2	0.843658
USP31	ATP5S	0.945197
SUPT20H	DDX6	0.666938
ZNF655	SLC37A1	0.792344
DNAL1	PCGF5	0.635343
C5orf24	ZBTB33	0.810151
RAB3GAP2	C5orf24	0.517083
RASL11A	SMG1	0.512769
ORAI1	CHST11	0.723578
ZNF644	CMYA5	0.66266
CWF19L2	SSFA2	0.70163
SPAG9	UBQLN1	0.870676
SHE	CCNDBP1	0.616741
UGT8	CACNA1C	0.607278
PRSS23	COG6	0.742696
GNAQ	ADAMTS6	0.687715
AFF4	ARL5B	0.578262
BANP	GRTP1	0.760389
USHBP1	COG6	0.350279
APPL1	ITCH	0.886017
KBTBD12	ZC3H12C	0.348853
GNAQ	ASXL2	0.653037
CCSER2	PRSS23	0.870807
GNG2	RBM15	0.795326
TMTC3	OARD1	0.610918
TGFBR1	KLHL42	0.784293
OGFRL1	CPEB4	0.825361
ARHGAP5	RAB3GAP1	0.759566
VWCE	HIC1	0.69309
CCSER2	HSPA5	0.732454
AASDH	LARP6	0.828102
ZNF605	TMEM50A	0.749348
SPAG9	PCGF5	0.890073
BIRC6	TET3	0.846248
CERS6	RASGRF2	0.750547
ARHGAP5	TMEM50A	0.904432
SNX18	ZSWIM6	0.872051
PACSIN1	EPM2AIP1	0.60155
UHRF1BP1	RASA2	0.828553
FAM126B	CLSPN	0.278812
CD109	UGGT2	0.7983
TMEM245	ATP11C	0.713182
CD109	ORAI1	0.855927
CGGBP1	GTF3C3	0.824643
METTL24	LMO7	0.383793
EBF3	PRR14L	0.516237
KLHL5	SELENOI	0.764315
CD109	CDC42SE1	0.634664
ARHGAP5	SOCS4	0.272405
HEATR5B	CEP97	0.417865
SNX18	SMG1	0.84628
BRWD3	TMEM50A	0.767227
REEP3	DCP1A	0.742748
EEPD1	RSAD2	0.680016
TBL1XR1	ITCH	0.839393
CMYA5	TTBK2	0.712876
PARP6	HTRA3	0.71007
SLC25A23	NUFIP2	0.749786
PRSS23	RAD52	0.809742
TMTC3	RLIM	0.61576
WHAMM	PRSS23	0.639279
FAM126A	EXOC3	0.66486
CGGBP1	CNOT6L	0.864344
TPMT	RBM25	0.729249
GALNT18	INPP5F	0.717791
MPP5	RICTOR	0.856475
CDC26	SLX4IP	0.532714
APPL1	C16orf72	0.930944
SMAD5	RAB23	0.855584
ZNF12	EPM2AIP1	0.764809
NAA25	SBNO1	0.681965
EGLN3	HSPA5	0.712526
ARHGAP21	PRKD3	0.85352
RORC	XPNPEP3	0.514469
HOXD8	ANKRD44	0.68221
EBF3	UBQLN1	0.5835
ZBTB38	ITCH	0.747357
GPAM	IRF2BP2	0.713138
LRRC8B	BCLAF1	0.638561
SLC26A2	LARP6	0.863424
CNOT6	HEATR5A	0.726699
ZNF322	SKIL	0.773628
NES	COL12A1	0.674446
CASC4	RIPK3	0.627937
CPEB4	RICTOR	0.95218
CLCN5	SCUBE3	0.581043
UGGT1	TSPAN11	0.280336
CACUL1	QSOX1	0.718699
HOXD8	CNTN1	0.709956
PDS5B	VPS13A	0.783777
DPY19L3	RAD52	0.748846
RAB8B	ZSWIM6	0.926416
HMCN1	DDX6	0.599046
APPL1	SDR16C5	0.684811
ARRDC2	ZBTB4	0.806501
ANKIB1	WWC2	0.718712
TRIM65	RBM15	0.536958
FNIP1	RICTOR	0.790475
CYGB	CAND1	0.483991
FAM126B	LRRC58	0.724773
MDGA1	RASGRF2	0.521281
LYSMD2	PCGF5	0.963121
SMAD5	SLC35G1	0.446796
RSBN1	RICTOR	0.811877
CPD	WWC2	0.917462
ZSWIM6	EMG1	0.621842
TGFBR1	FAR1	0.882678
TMX3	FNDC3B	0.848141
RIC1	SKAP2	0.755209
UBA6	WNK1	0.801154
PCGF5	GALNT15	0.916484
PDE4C	RIMKLA	0.546307
RAB8B	TMED8	0.881117
HERPUD2	PDLIM3	0.822809
TMEM263	ZBTB41	0.813327
ARHGAP5	CD109	0.898148
TMEM263	XG	0.382848
KLHL24	USP31	0.87233
HEATR5B	CLEC3A	0.677207
PBRM1	SLC22A3	0.627673
ORAI1	OTUD1	0.636967
LMBR1L	RLIM	0.510603
PTBP3	SNX13	0.920542
GNAQ	SMAD5	0.904004
EMSY	CEP85L	0.558658
TBX15	SCUBE3	0.516752
TMEM263	OLFM2	0.430357
TMTC3	PCYOX1	0.876168
YPEL3	PLXDC2	0.845157
PDK1	GNB4	0.863456
DHX36	SIX4	0.548946
ATP6V0A2	ATP11C	0.653556
ZHX1	BOLA3	0.862883
FAM126B	KCTD9	0.870666
SNX18	FBXO30	0.822519
WDFY3	TBRG1	0.793446
ABL2	ALDH18A1	0.865157
LYSMD2	RIMKLA	0.854919
GPC2	MRAS	0.582335
AASDH	RFX2	0.785314
C6orf136	RASA2	0.80514
YOD1	SLC35B4	0.767309
CCDC186	IRF2BP2	0.667879
CNRIP1	RBM15	0.851216
CGGBP1	PREPL	0.766026
HDAC7	KLHL42	0.429351
CGNL1	ZNF770	0.747841
MIB1	OSBPL10	0.725406
SLC30A4	EML4	0.702741
RASSF8	RNF145	0.744238
LHX6	ANO5	0.655626
CGGBP1	NAA25	0.75392
PTBP3	ITCH	0.87212
GEMIN5	FNDC3B	0.87582
CPEB4	LMO7	0.673641
ABHD16A	KLHL42	0.667903
DSTYK	FAM210B	0.642524
EMSY	PCGF5	0.688338
PTBP3	SLC41A2	0.675223
SLC22A3	ADAM33	0.468829
RAB6B	ITCH	0.573447
ZDHHC20	DHX36	0.572999
CCSER2	NFYC	0.580181
NUDT17	CCNDBP1	0.762941
RAB23	MIB1	0.879406
GRTP1	SLC46A2	0.352
CNTN1	PEAR1	0.392846
RORC	ZBTB4	0.727728
CD109	RBP7	0.530594
AASDH	SFRP2	0.777316
LRP6	QKI	0.959129
FAM126B	PDP2	0.479519
DELE1	SOWAHC	0.763522
ZNF280B	PIP4P1	0.726316
BMP2K	SSFA2	0.833108
FAM210B	TMEM50A	0.799785
BMF	RORC	0.617347
RORC	A1BG	0.610671
TMEM245	PREP	0.766725
SPAG9	CPEB4	0.924028
MIB1	ZSWIM6	0.912326
CPSF2	TMTC3	0.774413
BCLAF1	RBM25	0.747806
SCARA5	THNSL1	0.754825
LYSMD2	FAM91A1	0.582565
CCSER2	ZNF24	0.912677
FNIP1	FRS2	0.626139
GEMIN5	TMEM245	0.834908
GALNT18	ANO2	0.730659
PRKAR2A	CPD	0.862623
SPRYD3	TMTC3	0.855945
DELE1	CPD	0.829021
CGGBP1	ST6GAL2	0.652888
UBQLN1	NIN	0.718786
CAVIN2	IRF2BP2	0.524692
DCBLD2	ABL2	0.8319
KIAA1549	DHX36	0.866909
SMAD5	MIB1	0.863348
CGNL1	SFXN1	0.63001
DELE1	EDIL3	0.812286
TMTC3	PDE5A	0.659405
COL6A5	NIN	0.215529
CNOT6L	USF3	0.517255
SPAG9	GPR155	0.569591
NUFIP2	BTBD7	0.68541
CHST7	SKIL	0.543946
TTPAL	TTBK2	0.77033
CDKN2B	FNDC3B	0.918313
REL	AUTS2	0.575655
JUN	NFKBIA	0.846105
SH3BP5	LZTFL1	0.522164
GLCE	KDELR3	0.553724
ASB9	CSRP2	0.577056
SERPINE1	COL11A1	0.757722
MAN1C1	MGLL	0.753484
STX8	ITIH5	0.477775
ACAP2	SMC5	0.867769
LOXL2	FLT3LG	0.551023
PLA2G16	CYB5A	0.883478
SEL1L	ITPR1	0.756453
HSPA4L	PNPLA2	0.4981
MAP3K7	SRI	0.804315
ENPP4	KAT5	0.595823
FMO3	ATF2	0.466048
TPR	BPTF	0.786659
RYBP	LTBP2	0.789462
IGFBP5	OLFML1	0.491128
AHNAK	SSR1	0.746942
GAD1	ITGB1BP1	0.482894
PALLD	SYNJ2	0.861338
ADAMTS17	SFRP1	0.300884
LOXL2	FN1	0.752996
CA4	PLA2G16	0.95519
MYOM1	MAPK6	0.652138
GFPT1	ZNF423	0.768522
RDX	EPHB2	0.527324
KIF5B	SEC23A	0.741692
EGFL7	PALLD	0.415573
MPDZ	KDM5B	0.724998
STRN	GPS2	0.344309
PSMB9	CD46	0.806229
TAB2	KCTD12	0.545672
JUN	SLC4A4	0.391966
MAN1A2	KTN1	0.661506
KTN1	RUNX1	0.548968
GFPT1	CD2AP	0.696468
HSPB7	LTBP4	0.630834
RELN	ZFPM2	0.417813
STX8	TDRD3	0.496285
HAPLN1	RAB21	0.574656
PLAUR	NAV3	0.560411
SLC16A1	CKAP4	0.934195
SHOC2	AXL	0.709114
SLC16A1	PTP4A3	0.643084
RAB22A	LTBP2	0.743768
RYBP	SCRG1	0.335358
MALT1	MSX1	0.6782
MAN1A2	MTMR14	0.44516
SYNCRIP	IDE	0.785931
PLCB4	ZCCHC14	0.636657
GFPT1	SEC24D	0.761854
IGFBP6	SSR1	0.699055
BTBD3	OLR1	0.300034
HMGCR	PALLD	0.862384
MEF2A	ITPR1	0.628101
LYVE1	CAPN3	0.366512
FAM81A	DSG3	0.261549
BGN	HSPA2	0.650266
TRIM37	ELP1	0.485729
DAG1	HSPA13	0.714983
TRIP12	MPP6	0.538202
SLF2	CEP170	0.598378
MCC	REL	0.478674
MID1	COL2A1	0.716113
PLCB4	CD46	0.881465
AZIN1	ADK	0.89305
ATRN	ACLY	0.502388
KTN1	TESK2	0.617491
SEC23A	FAIM2	0.540856
ELP1	PALM	0.571281
TNFRSF21	HOXB7	0.656473
SMC5	KCTD12	0.824192
DAG1	BTBD3	0.766463
MAGED1	NAB1	0.785643
BTBD3	MSX1	0.859432
CKAP4	COQ8A	0.691582
SECISBP2L	MAN1C1	0.734971
STAT6	SOCS5	0.762982
SHROOM2	SRI	0.825656
PDE1C	WWTR1	0.607962
FEM1B	PPP2R3A	0.563085
RTN2	CAVIN1	0.847373
HSPA4L	ANOS1	0.746584
ENPP4	WASHC4	0.62304
PLAUR	CKAP4	0.929794
LIPE	DUSP1	0.70895
ENTPD4	DUSP1	0.663267
SRI	YTHDC2	0.451153
KLF4	CKAP4	0.768869
AUTS2	CTNNB1	0.488718
TMOD1	LTBP4	0.652954
RAB5A	PPP2R3A	0.698914
EGFL7	FHL5	0.356132
INHBA	UHRF1BP1L	0.441681
MGLL	LTBP2	0.938634
LTBP2	SRI	0.822256
CD300LG	SFRP1	0.285537
AXL	DUSP1	0.876446
QDPR	ITGB1BP1	0.850643
SELENOP	MAPK6	0.834141
CLIC4	ADK	0.928658
S100A4	NR1H3	0.709101
AXL	IL15RA	0.704967
FLNC	STX8	0.556196
RAPGEF3	COL14A1	0.610577
SLK	NFKBIA	0.61252
CLEC3B	COL8A1	0.637405
KIDINS220	PPP2R3A	0.664506
NCOA2	RDX	0.544779
RND3	DPY19L1	0.60318
CD34	AGTR1	0.662476
LTBP4	C1orf115	0.84849
STAT6	CASP8AP2	0.608514
CSF2RA	CDS1	0.299368
WNT5A	MFAP5	0.700043
RND3	DDX3X	0.485577
STK26	KCTD12	0.810961
INHBA	ATM	0.616655
PLOD1	CD46	0.653162
STK26	CXCL12	0.864336
S100A4	KTN1	0.740345
MUC4	KDELR3	0.596925
TIE1	NPR1	0.565861
ARHGEF15	PECAM1	0.513082
RND3	MDFI	0.442192
GATA2	ETV1	0.727038
CKAP4	GJA1	0.601133
MAP3K7	KCTD12	0.80977
HMGCR	DUSP1	0.821031
CAVIN1	TNFSF10	0.848396
KDELR3	GPC3	0.714809
CD36	DDAH1	0.62443
UBR5	AUTS2	0.698053
SYNJ2	PIGQ	0.547593
F8	SQLE	0.729622
CPA4	ITPR1	0.502037
JUN	IGFBP5	0.796238
AHNAK	DUSP1	0.837159
KLF4	RRAD	0.549497
PNP	PRKACB	0.51994
ANGPTL2	BTBD3	0.506599
NTRK2	SRI	0.561869
ARMCX3	SRI	0.810737
HMGCR	ACLY	0.688789
MAN1A2	MOB2	0.30668
P4HA1	MEOX2	0.693907
NF1	UBR5	0.715815
SLC16A1	ANKLE2	0.636205
FEM1C	CPT1A	0.692584
GLUL	PLA2G16	0.761389
AXL	P4HA1	0.911862
DUSP14	TSPAN4	0.835437
THUMPD1	MDFIC	0.678054
STK26	AXL	0.817825
SSR1	FAT1	0.403134
WISP1	TBC1D4	0.576251
CXCL12	P4HA1	0.875564
SENP5	XPOT	0.685088
RDX	KANK3	0.333917
MAP3K7	PTPN11	0.586323
PRKACB	DENND2C	0.595816
CBX7	CD2AP	0.444527
SMC5	SLC30A9	0.727909
ROR2	FN1	0.578605
LTBP2	RAB21	0.801417
ROR1	KCTD12	0.824405
WFS1	C1orf115	0.508216
INHBA	SYBU	0.50544
LTBP2	SYNJ2	0.82511
ST3GAL4	AOC3	0.774237
PRKACB	KCTD12	0.92105
RND3	FEM1C	0.786956
DEPP1	PPP1R15A	0.646802
NRAS	LTBP2	0.807958
DZIP1	AXL	0.606185
RPL18A	GATA2	0.662544
RELN	NPR1	0.649794
CDKN1B	CLIC5	0.686508
HLTF	ELF5	0.474426
FKBP10	SELENOP	0.52562
CLIC4	SYNJ2	0.851177
NRIP1	NCOA3	0.744314
LTBP2	DAZAP2	0.885783
VEGFA	CDS1	0.734911
FKTN	SYNJ2	0.373583
LDLR	PGK1	0.594926
ENTPD4	STK38L	0.662039
SYNCRIP	SCUBE2	0.354915
NEK1	JAM2	0.54225
ADAM12	KDM5B	0.589561
BMPR1A	TRIM33	0.724584
MAP3K7	EFR3A	0.603267
CSRP2	DES	0.541932
PLAUR	TBC1D4	0.726238
RDX	BMP4	0.834773
ENPP4	SRI	0.628072
SQLE	PPP2R3A	0.893985
KDM5B	IFFO1	0.417739
DUSP10	EPOR	0.671545
YTHDF3	CD46	0.448736
GPIHBP1	S1PR1	0.524303
CEMIP	P3H4	0.503746
CD2AP	ITGA1	0.555458
KDM5B	CEP170	0.803179
TRPC6	FABP4	0.622165
C1orf115	NEBL	0.69123
LTBP2	CTDSP1	0.721762
RAB22A	NOTCH2	0.574626
BMP4	IDE	0.832258
SERPINE1	SHC1	0.521662
MFAP5	SFRP1	0.775025
SERPINE1	PLAUR	0.834074
CAT	TSPAN4	0.783942
NF1	SOCS5	0.719907
GPNMB	AXL	0.831045
ST3GAL4	NFKBIA	0.904046
MAPK6	HOXB7	0.698799
NECTIN3	SH3BP5	0.631516
THRA	SELENOP	0.519026
CAVIN1	CALM1	0.6882
MRGPRF	NR1H3	0.388332
WWTR1	SELENOP	0.895856
FN1	LTBP2	0.79455
FLNC	KCTD12	0.732765
JUN	GPS2	0.442569
KLF10	DUSP1	0.778318
CD46	GFPT1	0.858367
ROBO1	ANOS1	0.397946
NFKBIA	SP2	0.633276
ST3GAL4	SYNJ2	0.939984
TRIP11	ANOS1	0.70837
ATF2	GFPT1	0.705981
DEPP1	LTBP2	0.80341
RDX	ANOS1	0.846788
TMOD1	MON2	0.556588
TAGLN2	TXNIP	0.815843
FZD4	KTN1	0.545974
COL28A1	FABP4	0.320742
RAB21	ADGRL3	0.530168
IRF1	KCTD12	0.699235
GLUL	TIA1	0.704116
SIGIRR	MAP3K7	0.616568
NF1	ITGA10	0.516161
OSBPL3	WWTR1	0.662872
ROCK2	TRIB2	0.804958
CSPG4	ACAP2	0.643126
KDM5B	PLCE1	0.581147
N4BP2L1	KDELR3	0.717958
SERPINE1	NPR1	0.864664
KTN1	ATP10B	0.740122
RND3	THBS4	0.778549
BNIP2	AXL	0.677414
HSPA2	MEOX2	0.69138
PSMB9	CD99	0.814759
ST3GAL4	CACNA1H	0.441124
RND3	DSG3	0.592055
RND3	WWTR1	0.819736
JAM2	DAZAP2	0.636191
NECTIN3	NUPR1	0.595735
TRIP12	TSPAN4	0.681177
PPP1R13L	CRTC3	0.71086
ANGPTL1	TSC22D3	0.460494
TSEN34	CD2AP	0.558515
CKAP4	FABP4	0.805369
TRIP11	FCER1A	0.382725
PTN	KLF4	0.628286
SPON2	SFRP1	0.614127
ATP2C1	CCNT2	0.664398
CDH11	PECAM1	0.79452
GPD1	BGN	0.430529
PSMB8	PSMB9	0.727691
MYL12A	CPT1A	0.447279
ALDH1L1	CFD	0.625531
PLA2G16	NPY1R	0.668508
NPR1	NOVA1	0.712238
S1PR1	RUNX1T1	0.628144
JUN	GATA2	0.859726
COL8A1	OLFML2B	0.778023
LPAR1	KCTD12	0.910766
PDE2A	ITPR1	0.597469
LYST	NAB1	0.398443
SERPINE1	SH3BP5	0.760834
CSRP2	AXL	0.612824
ATM	ROCK2	0.626503
NRAS	MBD4	0.755462
SELENOP	THBD	0.80227
LIF	CD46	0.47744
RCOR1	NUP133	0.64864
RUNX1T1	PPARG	0.75932
SYNCRIP	LMAN1	0.767238
MGLL	TNNC1	0.517944
SHROOM2	XPOT	0.79007
DUSP1	KCTD12	0.862601
PDPN	THBD	0.628087
LMOD1	OSBPL3	0.627473
ARMCX2	PALLD	0.717711
DSC3	TSPAN4	0.704472
LIPE	KLF11	0.469817
THUMPD1	MPPE1	0.530472
EBF2	OSBPL3	0.306443
TMX4	GNG11	0.735766
CLIC5	SELENOP	0.868858
PSEN1	FEM1C	0.535865
SRSF5	CEP170	0.719612
CD46	LTBP2	0.88172
AGTR1	LTBP2	0.706602
ROCK2	COL2A1	0.717668
TF	SEC23A	0.639771
LPAR1	ITPR1	0.764722
KDELR3	ANOS1	0.791927
RYBP	CSPG5	0.648042
DENND2C	SGF29	0.422605
TXNIP	TSC22D3	0.76538
CEMIP2	MAGED1	0.716051
PPP1R13L	S100A4	0.739781
CDH11	SLCO2A1	0.662312
DCN	CSGALNACT1	0.720522
HMGCR	GSAP	0.540568
SFRP1	CHSY1	0.793451
KLF4	BARX2	0.604406
SERPINE1	ALDH1L1	0.74106
SLC23A2	HLTF	0.787078
TCF12	SLC23A2	0.928767
PKN1	NRAS	0.434799
NFKBIA	AGPAT2	0.61469
BPTF	NCOA3	0.844116
CD46	PGK1	0.890892
CAT	COL14A1	0.616395
CCL13	ARMCX2	0.510611
TAGLN2	CAPN3	0.719488
S100A4	CYP27A1	0.420191
RCOR1	LTBP2	0.747253
RBP4	TLK1	0.648418
PSMB9	PTPRZ1	0.514835
CEMIP	P4HA1	0.563025
PANX1	MAP3K7	0.637362
LBH	SFRP1	0.589561
PLAUR	ADCY2	0.606928
IRAK3	IRF1	0.636798
CAT	KMT2A	0.744825
CAT	ICAM2	0.547562
CENPE	NUP155	0.883992
VTN	ASF1B	0.709101
CDCA5	ITGA2	0.802773
ARG1	ITGA2	0.670588
CENPE	ENO1	0.871629
CALCOCO1	GPSM2	0.642047
DEPDC1	TOP2A	0.905847
NCAPD3	CKB	0.567105
KIF14	RBBP8	0.785622
CENPE	BRCA1	0.937599
NCAPD3	KIF15	0.773821
MKI67	HMMR	0.981811
PIK3IP1	TOP2A	0.505043
MKI67	TNXB	0.492303
ORC6	TNKS	0.490091
SHMT2	KIF11	0.742054
KIF11	ADCY3	0.728658
ARID5B	TPX2	0.695913
CENPL	GEN1	0.538293
DGKG	ARID5B	0.493065
KIF2A	ABCC4	0.534013
KIF14	GPSM2	0.917314
ORC6	SHCBP1	0.655867
DSN1	BRCA1	0.437035
RASIP1	KIF11	0.311512
GEN1	FANCD2	0.700338
MKI67	ACAN	0.477882
CKAP2	TOP2A	0.586471
NCAPG	CDC6	0.90828
TK1	TPX2	0.883
ACAT2	BRCA1	0.873015
SACS	TOP2A	0.649141
ANLN	SGO2	0.964727
CDC14B	TPX2	0.82979
ITGA2	THBS1	0.889855
ANLN	ABCC4	0.665329
ZNF367	DEPDC1	0.569209
KIF14	PRC1	0.962158
SMC2	DCK	0.50965
COL5A2	GAS2L3	0.465471
SMC2	PLXDC1	0.408815
CENPE	SHCBP1	0.794231
TAF2	LSM6	0.5514
RASSF6	CDCA5	0.375313
CKAP2L	TNIK	0.615991
GEN1	TOP2A	0.813113
CKAP2L	HEMK1	0.408738
CDC14B	FIS1	0.554388
CENPL	CILP2	0.203797
KNL1	CENPH	0.831921
PARP2	TPX2	0.761345
CKAP2L	SGO2	0.904099
DCLK1	PDLIM5	0.829306
MCM10	LAPTM4A	0.74552
NCAPG2	TPX2	0.954939
PLOD2	TOP2A	0.922161
PTGER4	TNIK	0.551793
SMC2	PRC1	0.773286
DEPDC1	C18orf54	0.656486
NCAPD3	TPX2	0.91365
EXO1	CDC6	0.942989
TOP2A	HMMR	0.946746
GEN1	CENPJ	0.699165
ASF1B	CDC6	0.811662
PPAT	TOP2A	0.875458
STIL	BRCA1	0.801553
MCM10	FERMT1	0.958164
BYSL	TOP2A	0.633417
TK1	MYBL1	0.787702
GAS2L3	ZBTB10	0.404316
GAS2L3	TOP2A	0.849062
KIF11	TPX2	0.878252
FANCM	ZWILCH	0.588187
PDLIM5	LSM6	0.573253
KNTC1	TPX2	0.979563
ANLN	CDCA2	0.627994
TRIM59	ANLN	0.945191
SGO2	MPHOSPH9	0.811354
CALCOCO1	WDR3	0.489816
ADA	PARP2	0.547079
CDC14B	ZWILCH	0.828969
PWP1	RGS6	0.72902
TFRC	KIF14	0.860593
GAS2L3	AMIGO2	0.515536
KIF14	MASTL	0.903387
ACAT2	RNGTT	0.434154
KIF14	PDLIM3	0.968669
LARP6	CDC6	0.955471
PRKACB	LARP6	0.949548
PRKAR2A	PLCB4	0.94748
SPAG9	TOP2A	0.94314
CD46	LARP6	0.941083
PRSS23	THBS1	0.939673
MGLL	ITGA2	0.939479
RCOR1	KIF14	0.939236
FNDC3B	ITGA2	0.933999
LRP6	SSR1	0.933106
ATP6V0A2	ITGA2	0.93148
RAB21	VPS13A	0.930437
ARHGAP5	THBS1	0.927784
SSR1	C16orf72	0.919247
CPEB2	MPHOSPH9	0.918121
SPAG9	LTBP2	0.913756
BCLAF1	DEPDC1	0.911049
PTBP3	GAS2L3	0.908473
QKI	SFRP1	0.907985
STK26	DEPDC1	0.903829
DUSP1	THBS1	0.900357
CD46	ITGA2	0.899908
MAP3K7	SKAP2	0.899124
LTBP2	SSFA2	0.897339
PRKACB	SLC2A13	0.894534
KCTD12	LARP6	0.893225
PNPT1	RAB21	0.891159
FAR1	THBS1	0.890425
SSR1	RASGRF2	0.889553
KIF14	LTBP2	0.889532
PDK1	PGK1	0.889075
CCSER2	CD46	0.883848
PCGF5	MPHOSPH9	0.883776
RASA2	SYNJ2	0.881152
MGLL	PDLIM5	0.880787
PNPT1	SSR1	0.879616
ASF1B	KCTD12	0.87889
DCLK1	PTBP3	0.87698
KIF14	SLC26A2	0.876888
DCBLD2	THBS1	0.876254
CAT	TOP2A	0.874978
PRKACB	ZSWIM6	0.872646
ADAM12	PDK1	0.871717
DCLK1	WNK1	0.868802
SMAD5	NFKBIA	0.868496
SHMT2	SLC30A9	0.867194
UBR5	PRSS23	0.867067
LTBP2	ACTR2	0.866821
PRKAR2A	PGK1	0.866179
SYNCRIP	DCLK1	0.865099
QKI	CAPN3	0.862392
PLCB4	PRKD3	0.861876
PDLIM3	CKAP4	0.861607
CENPH	PCGF5	0.86109
DUSP1	HDAC5	0.859888
XPOT	TPX2	0.858574
PRSS23	ITGA2	0.857772
GAS2L3	TSC22D3	0.856374
PDE4D	SYNJ2	0.855825
SUPT20H	ITGA2	0.854873
SPAG9	ZWILCH	0.854206
DCLK1	ALDH18A1	0.85384
MAN1A2	ZBTB4	0.853642
DAG1	DCBLD2	0.852985
BPTF	PCGF5	0.852828
CPD	GFPT1	0.85134
GEN1	NUFIP2	0.851282
RAD52	KMT2A	0.85055
ABL2	SGO2	0.849882
AHNAK	SLC26A2	0.848686
CD109	MGLL	0.845827
TMEM245	DEPDC1	0.845548
WWTR1	LARP6	0.845357
IGFBP6	QSOX1	0.841846
DELE1	NEBL	0.841105
ARID5B	SRI	0.839902
NCAPD3	KDELR3	0.839376
SMC2	CAND1	0.838552
HSPA4L	ABCC4	0.837109
MKI67	RSBN1	0.836175
C1orf115	ZWILCH	0.834723
PTBP3	ANOS1	0.834074
CLIC4	ASF1B	0.833854
APPL1	STK26	0.833414
SLC16A1	FERMT1	0.832616
MASTL	RASA2	0.831233
DCLK1	ITPR1	0.830624
PIP4P1	PGK1	0.83004
STK26	ABCC4	0.829306
CDC14B	AHNAK	0.829082
TFRC	DCBLD2	0.828865
STK26	PTBP3	0.827658
CGGBP1	PRKACB	0.826961
SLC16A1	PLOD2	0.825629
KLHL24	CKAP4	0.823324
TMEM263	GEN1	0.823253
RSBN1	LTBP2	0.822924
TFDP2	PPP2R3A	0.822657
DAG1	CDC6	0.82206
LMO3	TXNIP	0.822051
ZWILCH	SOWAHC	0.820006
LTBP2	KCTD9	0.818388
FNDC3B	CKAP4	0.817925
UBQLN1	RUNX1T1	0.816694
RND3	PRKAR2A	0.816146
SUPT20H	RPL18A	0.815641
CGGBP1	TFRC	0.815568
CDC14B	RRAD	0.81486
TPMT	LMAN1	0.814224
BMP4	TOP2A	0.813558
XPNPEP3	SYNJ2	0.812742
SSR1	PCGF5	0.810277
CDH11	FAR1	0.809577
LARP6	ACTR2	0.809262
KDM5B	CDC6	0.809168
PREP	MPHOSPH9	0.807086
NF1	RBM25	0.806629
QSOX1	NEBL	0.805924
PREP	IRF1	0.805694
RND3	PREP	0.805599
PLOD2	NR1H3	0.805044
TRIP12	TOX	0.805005
DELE1	FEM1C	0.804996
FN1	CDC6	0.804555
PTBP3	LMAN1	0.803699
CNRIP1	CYYR1	0.803463
CGGBP1	PGK1	0.802067
ACAT2	TFDP2	0.801902
IRF2BP2	THBS1	0.801514
RBM25	TIA1	0.801184
PRDM16	CKAP4	0.800824
DUSP1	ERCC4	0.800336
ATP5S	PWP1	0.799075
LTBP2	ALDH18A1	0.798958
COL12A1	THBS1	0.798717
FAM210B	DDX3X	0.798093
STK26	MKI67	0.797749
GOPC	DEPDC1	0.797631
PDLIM5	CCNDBP1	0.796337
TMED8	THBS1	0.795618
KIF5B	GNAQ	0.795345
MGLL	LARP6	0.795127
TNXB	RBM15	0.794729
TMED8	SYNJ2	0.79437
RPL18A	FAU	0.793051
RYBP	KLHL42	0.791484
ANLN	KCTD9	0.791071
PLOD2	MFAP5	0.790727
SOCS5	QKI	0.790394
PDK1	SSR1	0.789888
RND3	GPSM2	0.788588
PALLD	THBS1	0.788466
MASTL	ATP5S	0.788166
SMAD5	SQLE	0.787222
CDH11	PRSS23	0.786054
TK1	HLTF	0.785869
ITCH	SYNJ2	0.785478
ACAT2	BOLA3	0.784577
MCM10	GNA13	0.784345
DENND2C	KLHL41	0.783394
CCL13	CAND1	0.782948
PREPL	GFPT1	0.782709
DEPDC1	PCGF5	0.782543
AFAP1L1	PDPN	0.782315
TFRC	IGFBP6	0.78169
KDM3A	SRI	0.781659
TPX2	NUPR1	0.781607
CD46	ATP5S	0.779285
CLOCK	LMAN1	0.778781
INHBA	FNDC3B	0.777717
CCDC88A	SYNJ2	0.777538
SLC26A2	SFRP1	0.777242
DSG3	KIF14	0.776035
DELE1	PLOD2	0.775142
ATP5S	TRIM33	0.774781
LYSMD2	ANLN	0.774344
SERPINE1	PLOD2	0.774226
TBL1XR1	SFRP1	0.774087
HSPA5	CPT1A	0.77397
HEATR5A	THBD	0.773933
GEN1	C6orf203	0.773607
TNXB	TXNIP	0.773521
AVL9	GAS2L3	0.771887
DEPDC1	RASGRF2	0.77081
FERMT1	TSC22D3	0.770805
FN1	THBS1	0.770751
ALDH1A2	FABP4	0.769541
CGGBP1	UBR5	0.769497
PNPT1	DEPDC1	0.769411
COL5A2	KCTD12	0.768065
PRKACB	PCYT1B	0.766332
TPX2	FEM1C	0.766277
DCLK1	RUNX1T1	0.765424
THBD	BOLA3	0.76493
SPAG9	MCM10	0.764359
SH3BP5	WWC2	0.762772
MDM4	PGK1	0.762584
CD109	ITGA2	0.762076
UBQLN1	THBD	0.760995
SSR1	VPS13A	0.760534
CDC14B	ROCK2	0.760423
KIF11	PGK1	0.760367
DUSP1	MAPK1	0.758896
MKI67	SEC23A	0.758382
GNA13	ZWILCH	0.757464
BPTF	ZNF24	0.756948
ORAI1	RGS6	0.756436
CDC14B	ADK	0.756273
CD2AP	SOWAHC	0.756149
WASHC4	THBS1	0.756003
SHMT2	SMAD5	0.755552
UBR5	ARHGAP17	0.754616
IGFBP6	PLOD2	0.754333
TFDP2	ITGA2	0.753812
STK26	FAM208B	0.753699
EBF2	QKI	0.753529
DZIP1	PRSS23	0.75295
CEMIP2	LAPTM4A	0.75295
VPS13B	KCTD12	0.751961
SLCO2A1	SACS	0.751882
FNDC3B	HOXB7	0.751586
PDLIM3	KCTD12	0.750661
PPAT	PREPL	0.75065
ANLN	GALNT15	0.750278
VEGFA	IRF2BP2	0.750061
TSPAN4	WWC2	0.749826
KLHL24	NEBL	0.749448
PRC1	GFPT1	0.749162
LTBP2	ZNF12	0.749001
ALDH1L1	HOMER1	0.748818
AFAP1L1	ITGB1BP1	0.748364
PLXDC1	SEMA3G	0.747622
PTGER4	THBD	0.746965
HMGCR	FNDC3B	0.746341
PPAT	SSFA2	0.746307
BPTF	WNK1	0.746029
CDH11	C6orf136	0.745838
DELE1	ITPR1	0.745613
AHNAK	MPHOSPH9	0.745555
ITPR1	HMMR	0.745033
FN1	COL5A2	0.744848
TFRC	FAM210B	0.744813
SPAG9	CPA4	0.744593
CAPN3	CDC6	0.743884
CAPN3	EMG1	0.742813
DCLK1	ITCH	0.742474
RAB5A	ARRDC2	0.742305
CGGBP1	SGO2	0.742241
FAM126A	SH2D3C	0.742235
SMC2	CD2AP	0.742112
LZTFL1	HDAC5	0.742101
SPAG9	NEK1	0.742066
HMGCR	ABL2	0.742031
CADPS	SYNJ2	0.740556
CASP8AP2	CDC42SE1	0.740286
TRIB2	SLC26A2	0.74011
PTGER4	GLDC	0.739969
CKAP2L	BOLA3	0.739558
VPS13B	DUSP1	0.739252
QKI	PDLIM5	0.739158
MIB1	DUSP1	0.738428
SPAG9	SSR1	0.73818
TET3	KLF11	0.738074
PLCB4	MASTL	0.737962
CGGBP1	TRIM33	0.73772
COL14A1	ISLR	0.737696
CPD	SSR1	0.737566
FAR1	RAB21	0.73743
TBL1XR1	CDH11	0.737377
ZC3H12C	SLC30A9	0.737327
FAR1	PGK1	0.736809
ARID5B	PCGF5	0.736573
PLOD2	KDELR3	0.736383
CD109	CDC6	0.73627
DEPDC1	KCTD12	0.73611
STK26	UGGT2	0.735838
PDLIM5	ZBTB4	0.734834
FERMT1	PGK1	0.734507
DUSP10	ZBTB10	0.733458
SYNCRIP	RICTOR	0.733458
ATP2C1	GPSM2	0.733374
SLC16A1	QKI	0.732622
PANX1	DCBLD2	0.732287
VPS13A	PPP2R3A	0.732143
KIF5B	VPS13B	0.731628
QSOX1	SELENOP	0.731568
CENPE	DDX3X	0.731185
NCAPD3	TMOD1	0.730104
FAU	ANOS1	0.730007
MGLL	HSPA5	0.729646
FN1	RGS6	0.729634
CGGBP1	CDKN1B	0.729466
VCPIP1	SGO2	0.729321
ITCH	AZIN1	0.728742
GNB4	SYNJ2	0.728736
CDC14B	KLHL42	0.728622
LTBP2	AMIGO2	0.728223
FERMT1	AXL	0.728187
HOXD8	KCTD12	0.728
PNPT1	ABCC4	0.727969
EDIL3	KMT2A	0.727365
HOXD8	DEPDC1	0.727238
CGNL1	CAPN3	0.726692
ATP11C	ABCC4	0.726535
CD36	ZWILCH	0.726517
UBA6	RGS6	0.726238
KCTD12	THBS1	0.725436
CKB	ZSWIM6	0.725308
ANGPTL4	TXNIP	0.724889
SYNCRIP	TTPAL	0.724767
TPR	OSBPL10	0.724401
PRSS23	PALLD	0.724194
TMEM245	MASTL	0.72359
HMGCR	SACS	0.723389
QKI	ITGA2	0.72301
KIF14	DELE1	0.722692
LPAR1	THBS1	0.722631
[truncated: 135 more rows]

## Sheet: (C) Carcinoma PEP GO
Supplemental Table 3: Network-based enrichment of GO processes in the normal-carcinoma CMT comparison (A) and for each PEP (B, C).
GO_VERSION	releases/2018-05-14
NETWORK_NAME	mammary epithelium
NETWORK_VERSION	dd4974d1f0dc5bb5b8b11b6c657f4cd6c1a65d28
CLUSTER_NAME	CLUSTER_GENES
M1	MARCKSL1,EFHD1,TMBIM6,HERPUD1,CD55,STK26,GMNN,CDC7,BLVRB,SMOX,PDIA5,E2F1,EPHX1,DHRS3,NUP210,SLC3A2,MAGI2,TENM2,C17orf58,GATA3,GHR,ESR1,GPX3,CCNE1
M2	NSUN2,CADM4,CYP27B1,RNF157,SLC25A30,MFSD4A,SEMA5A,NGEF,CCDC80,SIAE,PDGFB,RERG
M3	PLCG1,FNBP1,WISP3,NSUN7,MOB3B,XK,CERS4,KCNN2,CES2,MLPH,JARID2,PGR,ACOXL,LRRC1,CES1,GRAMD1B,SMO,HAAO,TMEM45A,TFAP2B,CNTN3,CMTM8,DKK1,ANPEP,FBXO27,SNPH,DKK3,RTN4RL1,CEMIP
M4	PTX3,MAP4K4,TRPM4,BCHE,TM6SF1,ITGA9,ADRB2,FBP1,BCAT2,FKBP9,RNF128,FAM149A,GDF11,PLIN2
M5	NECAB3,PGBD5,KYAT1,STK32B,SORBS1,TUBB4A,CYP26A1,AMDHD1,HAP1,SLC6A7,ZBTB16,DNAJC12,CCDC170,FOXA1,CISH,MSX2,PDE6H,MC5R,GCGR,GALNT13,TBX1,SPA17,MTUS1,REEP6,LIMK1,DNMBP
M6	SLC25A42,CAPN5,HACL1,ATG3,FADS2,ANKEF1,COL27A1,HGSNAT,CAB39L,C15orf39,TMEM132A,RASGEF1B,C2orf40
CLUSTER_NAME	TERM_NAME	GO_ID	TERM_Q_VALUE	GENE_COUNT	TERM_GENES
M1	regulation of endoplasmic reticulum stress-induced intrinsic apoptotic signaling pathway	GO:1902235	0.00993151	2	TMBIM6,HERPUD1
M1	negative regulation of endoplasmic reticulum stress-induced intrinsic apoptotic signaling pathway	GO:1902236	0.00993151	2	TMBIM6,HERPUD1
M1	nuclear DNA replication	GO:0033260	0.00993151	2	GMNN,CDC7
M1	cell cycle DNA replication	GO:0044786	0.00993151	2	GMNN,CDC7
M1	regulation of binding	GO:0051098	0.0109702	4	GATA3,GMNN,TMBIM6,E2F1
M1	intrinsic apoptotic signaling pathway in response to endoplasmic reticulum stress	GO:0070059	0.013586	2	TMBIM6,HERPUD1
M1	regulation of DNA-dependent DNA replication	GO:0090329	0.013586	2	GMNN,CDC7
M1	response to estrogen	GO:0043627	0.0136049	2	GATA3,ESR1
M1	negative regulation of intracellular signal transduction	GO:1902532	0.0136049	4	TMBIM6,ESR1,HERPUD1,MAGI2
M1	negative regulation of response to endoplasmic reticulum stress	GO:1903573	0.0136049	2	TMBIM6,HERPUD1
M1	intrinsic apoptotic signaling pathway	GO:0097193	0.0152246	3	TMBIM6,E2F1,HERPUD1
M1	calcium ion homeostasis	GO:0055074	0.0154328	3	TMBIM6,CD55,HERPUD1
M1	cellular calcium ion homeostasis	GO:0006874	0.0154328	3	TMBIM6,CD55,HERPUD1
M1	divalent inorganic cation homeostasis	GO:0072507	0.0164919	3	TMBIM6,CD55,HERPUD1
M1	cellular metal ion homeostasis	GO:0006875	0.0164919	3	TMBIM6,CD55,HERPUD1
M1	cellular divalent inorganic cation homeostasis	GO:0072503	0.0164919	3	TMBIM6,CD55,HERPUD1
M1	response to dsRNA	GO:0043331	0.0164919	2	SLC3A2,ESR1
M1	regulation of response to endoplasmic reticulum stress	GO:1905897	0.0164919	2	TMBIM6,HERPUD1
M1	negative regulation of intrinsic apoptotic signaling pathway	GO:2001243	0.0164919	2	TMBIM6,HERPUD1
M1	regulation of DNA replication	GO:0006275	0.0164919	2	GMNN,CDC7
M1	DNA-dependent DNA replication	GO:0006261	0.0168249	2	GMNN,CDC7
M1	protein-DNA complex assembly	GO:0065004	0.0175364	2	ESR1,GMNN
M1	cellular cation homeostasis	GO:0030003	0.0178861	3	TMBIM6,CD55,HERPUD1
M1	regulation of DNA binding	GO:0051101	0.0178861	2	GATA3,E2F1
M1	metal ion homeostasis	GO:0055065	0.018101	3	TMBIM6,CD55,HERPUD1
M1	cellular ion homeostasis	GO:0006873	0.018101	3	TMBIM6,CD55,HERPUD1
M1	regulation of protein kinase B signaling	GO:0051896	0.0183876	2	GATA3,MAGI2
M1	hormone metabolic process	GO:0042445	0.018941	2	GATA3,GHR
M1	cation homeostasis	GO:0055080	0.018941	3	TMBIM6,CD55,HERPUD1
M1	regulation of inflammatory response	GO:0050727	0.018941	2	GATA3,CD55
M1	inorganic ion homeostasis	GO:0098771	0.0192516	3	TMBIM6,CD55,HERPUD1
M1	cellular chemical homeostasis	GO:0055082	0.0192516	3	TMBIM6,CD55,HERPUD1
M1	negative regulation of cell cycle	GO:0045786	0.0192516	3	GATA3,E2F1,GMNN
M1	protein-DNA complex subunit organization	GO:0071824	0.0192516	2	ESR1,GMNN
M1	protein kinase B signaling	GO:0043491	0.0192516	2	GATA3,MAGI2
M1	cellular homeostasis	GO:0019725	0.0213254	3	TMBIM6,CD55,HERPUD1
M1	regulation of intrinsic apoptotic signaling pathway	GO:2001242	0.0213254	2	TMBIM6,HERPUD1
M1	response to organonitrogen compound	GO:0010243	0.0223573	3	TMBIM6,GHR,HERPUD1
M1	DNA replication	GO:0006260	0.0223874	2	CDC7,GMNN
M1	cellular response to toxic substance	GO:0097237	0.02256	2	STK26,GPX3
M1	negative regulation of binding	GO:0051100	0.0235494	2	TMBIM6,E2F1
M1	positive regulation of binding	GO:0051099	0.0249073	2	GATA3,GMNN
M1	inflammatory response	GO:0006954	0.0255621	2	GATA3,CD55
M1	positive regulation of cytosolic calcium ion concentration	GO:0007204	0.0255621	2	TMBIM6,CD55
M1	negative regulation of apoptotic signaling pathway	GO:2001234	0.0263008	2	TMBIM6,HERPUD1
M1	response to nutrient levels	GO:0031667	0.0271922	2	TMBIM6,STK26
M1	regulation of cytosolic calcium ion concentration	GO:0051480	0.0282794	2	TMBIM6,CD55
M1	response to extracellular stimulus	GO:0009991	0.0286396	2	TMBIM6,STK26
M1	regulation of mitotic cell cycle phase transition	GO:1901990	0.0301848	2	CDC7,E2F1
M1	response to endoplasmic reticulum stress	GO:0034976	0.03173	2	TMBIM6,HERPUD1
M1	response to toxic substance	GO:0009636	0.0324313	2	STK26,GPX3
M1	regulation of cell cycle phase transition	GO:1901987	0.0373318	2	CDC7,E2F1
M1	regulation of hormone levels	GO:0010817	0.0390908	2	GATA3,GHR
M1	negative regulation of cell motility	GO:2000146	0.0392058	2	GATA3,STK26
M1	negative regulation of cellular component movement	GO:0051271	0.0402833	2	GATA3,STK26
M1	negative regulation of locomotion	GO:0040013	0.042618	2	GATA3,STK26
M1	mitotic cell cycle phase transition	GO:0044772	0.0463816	2	CDC7,E2F1
M1	regulation of apoptotic signaling pathway	GO:2001233	0.0521235	2	TMBIM6,HERPUD1
M1	heterocycle catabolic process	GO:0046700	0.0543778	2	E2F1,BLVRB
M1	cellular nitrogen compound catabolic process	GO:0044270	0.0543778	2	E2F1,BLVRB
M1	posttranscriptional regulation of gene expression	GO:0010608	0.0543778	2	ESR1,E2F1
M1	aromatic compound catabolic process	GO:0019439	0.054549	2	E2F1,BLVRB
M1	cell cycle phase transition	GO:0044770	0.054549	2	CDC7,E2F1
M1	cellular response to hormone stimulus	GO:0032870	0.0559573	2	GHR,ESR1
M1	organic cyclic compound catabolic process	GO:1901361	0.0568536	2	E2F1,BLVRB
M1	cellular response to lipid	GO:0071396	0.0568536	2	ESR1,CD55
M1	regulation of DNA metabolic process	GO:0051052	0.0612811	2	CDC7,GMNN
M1	cellular response to nitrogen compound	GO:1901699	0.063779	2	GHR,ESR1
M1	response to hormone	GO:0009725	0.063779	2	GHR,ESR1
M1	regulation of defense response	GO:0031347	0.0642016	2	GATA3,CD55
M1	regulation of mitotic cell cycle	GO:0007346	0.066865	2	CDC7,E2F1
M1	response to drug	GO:0042493	0.0706043	2	TMBIM6,STK26
M1	response to lipid	GO:0033993	0.0709871	2	ESR1,CD55
M1	regulation of response to external stimulus	GO:0032101	0.0721287	2	GATA3,CD55
M3	positive regulation of release of sequestered calcium ion into cytosol	GO:0051281	0.013586	2	CEMIP,PLCG1
M3	regulation of cation transmembrane transport	GO:1904062	0.0136049	3	KCNN2,CEMIP,PLCG1
M3	positive regulation of calcium ion transport into cytosol	GO:0010524	0.0136049	2	CEMIP,PLCG1
M3	regulation of release of sequestered calcium ion into cytosol	GO:0051279	0.0136049	2	CEMIP,PLCG1
M3	positive regulation of calcium ion transmembrane transport	GO:1904427	0.0136049	2	CEMIP,PLCG1
M3	regulation of ion transmembrane transport	GO:0034765	0.0154328	3	KCNN2,CEMIP,PLCG1
M3	regulation of metal ion transport	GO:0010959	0.0154328	3	KCNN2,CEMIP,PLCG1
M3	regulation of calcium ion transport into cytosol	GO:0010522	0.0154328	2	CEMIP,PLCG1
M3	regulation of transmembrane transport	GO:0034762	0.0164919	3	KCNN2,CEMIP,PLCG1
M3	steroid biosynthetic process	GO:0006694	0.0164919	2	CES1,DKK3
M3	positive regulation of calcium ion transport	GO:0051928	0.0164919	2	CEMIP,PLCG1
M3	negative regulation of sequestering of calcium ion	GO:0051283	0.0164919	2	CEMIP,PLCG1
M3	release of sequestered calcium ion into cytosol	GO:0051209	0.0164919	2	CEMIP,PLCG1
M3	sequestering of calcium ion	GO:0051208	0.0164919	2	CEMIP,PLCG1
M3	regulation of sequestering of calcium ion	GO:0051282	0.0164919	2	CEMIP,PLCG1
M3	regulation of calcium ion transmembrane transport	GO:1903169	0.0164919	2	CEMIP,PLCG1
M3	regulation of ion transport	GO:0043269	0.0178861	3	KCNN2,CEMIP,PLCG1
M3	positive regulation of cation transmembrane transport	GO:1904064	0.0178861	2	CEMIP,PLCG1
M3	calcium ion transmembrane import into cytosol	GO:0097553	0.018101	2	CEMIP,PLCG1
M3	positive regulation of ion transmembrane transport	GO:0034767	0.0183876	2	CEMIP,PLCG1
M3	negative regulation of canonical Wnt signaling pathway	GO:0090090	0.0183876	2	DKK3,DKK1
M3	calcium ion transport into cytosol	GO:0060402	0.0187304	2	CEMIP,PLCG1
M3	organic hydroxy compound biosynthetic process	GO:1901617	0.018941	2	CES1,DKK3
M3	small molecule biosynthetic process	GO:0044283	0.0192516	3	HAAO,CES1,DKK3
M3	cytosolic calcium ion transport	GO:0060401	0.0192516	2	CEMIP,PLCG1
M3	negative regulation of Wnt signaling pathway	GO:0030178	0.0194526	2	DKK3,DKK1
M3	positive regulation of transmembrane transport	GO:0034764	0.0213254	2	CEMIP,PLCG1
M3	regulation of calcium ion transport	GO:0051924	0.022156	2	CEMIP,PLCG1
M3	cellular homeostasis	GO:0019725	0.0223874	3	HAAO,CEMIP,PLCG1
M3	positive regulation of ion transport	GO:0043270	0.0255621	2	CEMIP,PLCG1
M3	steroid metabolic process	GO:0008202	0.0263008	2	CES1,DKK3
M3	positive regulation of cytosolic calcium ion concentration	GO:0007204	0.0264329	2	CEMIP,PLCG1
M3	regulation of cytosolic calcium ion concentration	GO:0051480	0.0298113	2	CEMIP,PLCG1
M3	regulation of canonical Wnt signaling pathway	GO:0060828	0.0305778	2	DKK3,DKK1
M3	fatty acid metabolic process	GO:0006631	0.0332761	2	CES2,CES1
M3	calcium ion transmembrane transport	GO:0070588	0.0332761	2	CEMIP,PLCG1
M3	maintenance of location	GO:0051235	0.0365135	2	CEMIP,PLCG1
M3	positive regulation of protein serine/threonine kinase activity	GO:0071902	0.0381392	2	CEMIP,DKK1
M3	organic hydroxy compound metabolic process	GO:1901615	0.0384126	2	CES1,DKK3
M3	canonical Wnt signaling pathway	GO:0060070	0.04015	2	DKK3,DKK1
M3	regulation of hormone levels	GO:0010817	0.0408524	2	DKK3,TFAP2B
M3	regulation of Wnt signaling pathway	GO:0030111	0.0409797	2	DKK3,DKK1
M3	cellular calcium ion homeostasis	GO:0006874	0.0411066	2	CEMIP,PLCG1
M3	calcium ion homeostasis	GO:0055074	0.0422368	2	CEMIP,PLCG1
M3	animal organ morphogenesis	GO:0009887	0.0433576	2	TFAP2B,DKK1
M3	cellular divalent inorganic cation homeostasis	GO:0072503	0.0452387	2	CEMIP,PLCG1
M3	calcium ion transport	GO:0006816	0.0463816	2	CEMIP,PLCG1
M3	divalent inorganic cation homeostasis	GO:0072507	0.0477772	2	CEMIP,PLCG1
M3	divalent metal ion transport	GO:0070838	0.0529811	2	CEMIP,PLCG1
M3	divalent inorganic cation transport	GO:0072511	0.0529811	2	CEMIP,PLCG1
M3	Wnt signaling pathway	GO:0016055	0.0535106	2	DKK3,DKK1
M3	cell-cell signaling by wnt	GO:0198738	0.0540372	2	DKK3,DKK1
M3	cellular metal ion homeostasis	GO:0006875	0.0543778	2	CEMIP,PLCG1
M3	lipid biosynthetic process	GO:0008610	0.054549	2	CES1,DKK3
M3	cell surface receptor signaling pathway involved in cell-cell signaling	GO:1905114	0.0568536	2	DKK3,DKK1
M3	regulation of protein serine/threonine kinase activity	GO:0071900	0.0569882	2	CEMIP,DKK1
M3	monocarboxylic acid metabolic process	GO:0032787	0.0569882	2	CES2,CES1
M3	cellular cation homeostasis	GO:0030003	0.0574753	2	CEMIP,PLCG1
M3	metal ion homeostasis	GO:0055065	0.0596986	2	CEMIP,PLCG1
M3	cellular ion homeostasis	GO:0006873	0.0596986	2	CEMIP,PLCG1
M3	positive regulation of protein kinase activity	GO:0045860	0.0650323	2	CEMIP,DKK1
M3	cation homeostasis	GO:0055080	0.0651022	2	CEMIP,PLCG1
M3	cellular chemical homeostasis	GO:0055082	0.0659895	2	CEMIP,PLCG1
M3	inorganic ion homeostasis	GO:0098771	0.066865	2	CEMIP,PLCG1
M3	drug metabolic process	GO:0017144	0.0681091	2	HAAO,DKK3
M3	positive regulation of kinase activity	GO:0033674	0.0697524	2	CEMIP,DKK1
M3	positive regulation of cell migration	GO:0030335	0.0710051	2	CEMIP,PLCG1
M3	positive regulation of cell motility	GO:2000147	0.0742244	2	CEMIP,PLCG1
M3	positive regulation of apoptotic process	GO:0043065	0.0754131	2	TFAP2B,PLCG1
M3	positive regulation of cellular component movement	GO:0051272	0.0754131	2	CEMIP,PLCG1
M3	positive regulation of programmed cell death	GO:0043068	0.0761992	2	TFAP2B,PLCG1
M6	protein complex oligomerization	GO:0051259	0.0235494	2	HGSNAT,HACL1
M5	adenylate cyclase-activating G-protein coupled receptor signaling pathway	GO:0007189	0.0154328	2	MC5R,GCGR
M5	cAMP-mediated signaling	GO:0019933	0.0177133	2	MC5R,GCGR
M5	cyclic-nucleotide-mediated signaling	GO:0019935	0.0178861	2	MC5R,GCGR
M5	adenylate cyclase-modulating G-protein coupled receptor signaling pathway	GO:0007188	0.0183876	2	MC5R,GCGR
M5	G-protein coupled receptor signaling pathway, coupled to cyclic nucleotide second messenger	GO:0007187	0.0188134	2	MC5R,GCGR
M5	skeletal system development	GO:0001501	0.021941	2	ZBTB16,TBX1
M5	glycoprotein biosynthetic process	GO:0009101	0.0255621	2	GALNT13,NECAB3
M5	glycoprotein metabolic process	GO:0009100	0.0324313	2	GALNT13,NECAB3
M5	regulation of supramolecular fiber organization	GO:1902903	0.0384126	2	LIMK1,TUBB4A
M5	second-messenger-mediated signaling	GO:0019932	0.0419882	2	MC5R,GCGR
M5	hematopoietic or lymphoid organ development	GO:0048534	0.0543778	2	ZBTB16,TBX1
M5	cellular response to hormone stimulus	GO:0032870	0.0559573	2	FOXA1,GCGR
M5	carbohydrate derivative biosynthetic process	GO:1901137	0.0559573	2	GALNT13,NECAB3
M5	immune system development	GO:0002520	0.0568536	2	ZBTB16,TBX1
M5	response to hormone	GO:0009725	0.063779	2	FOXA1,GCGR
M5	G-protein coupled receptor signaling pathway	GO:0007186	0.0646214	2	MC5R,GCGR
M5	regulation of cytoskeleton organization	GO:0051493	0.0650562	2	LIMK1,TUBB4A
M5	supramolecular fiber organization	GO:0097435	0.0654857	2	LIMK1,TUBB4A
M4	import into cell	GO:0098657	0.0281912	2	ADRB2,TRPM4
M4	monovalent inorganic cation transport	GO:0015672	0.0223573	2	ADRB2,TRPM4
M4	protein complex oligomerization	GO:0051259	0.0330517	2	TRPM4,FBP1
M4	protein homooligomerization	GO:0051260	0.0192516	2	TRPM4,FBP1
M4	protein tetramerization	GO:0051262	0.0152246	2	TRPM4,FBP1
M4	protein homotetramerization	GO:0051289	0.013586	2	TRPM4,FBP1
M2	negative regulation of lipid biosynthetic process	GO:0051055	0.00993151	2	CYP27B1,PDGFB
M2	negative regulation of lipid metabolic process	GO:0045833	0.0113167	2	CYP27B1,PDGFB
M2	regulation of lipid biosynthetic process	GO:0046890	0.013586	2	CYP27B1,PDGFB
M2	negative regulation of cell growth	GO:0030308	0.0136049	2	CYP27B1,RERG
M2	negative regulation of growth	GO:0045926	0.0154328	2	CYP27B1,RERG
M2	positive regulation of response to external stimulus	GO:0032103	0.0164919	2	CYP27B1,PDGFB
M2	regulation of small molecule metabolic process	GO:0062012	0.0164919	2	CYP27B1,PDGFB
M2	regulation of lipid metabolic process	GO:0019216	0.0164919	2	CYP27B1,PDGFB
M2	regulation of cell growth	GO:0001558	0.018101	2	CYP27B1,RERG
M2	cell growth	GO:0016049	0.0183876	2	CYP27B1,RERG
M2	carbohydrate metabolic process	GO:0005975	0.0183876	2	PDGFB,SIAE
M2	regulation of growth	GO:0040008	0.0192516	2	CYP27B1,RERG
M2	lipid biosynthetic process	GO:0008610	0.0201829	2	CYP27B1,PDGFB
M2	growth	GO:0040007	0.0213254	2	CYP27B1,RERG
M2	small molecule biosynthetic process	GO:0044283	0.0248267	2	CYP27B1,PDGFB
M2	negative regulation of cell proliferation	GO:0008285	0.0268227	2	CYP27B1,RERG
M2	regulation of response to external stimulus	GO:0032101	0.0282794	2	CYP27B1,PDGFB
SOURCE	TARGET	WEIGHT
SNPH	DKK3	0.18939
CES1	RTN4RL1	0.0717709
DKK1	FNBP1	0.318585
JARID2	KCNN2	0.180716
ANPEP	FNBP1	0.22316
LRRC1	FNBP1	0.185242
PLCG1	CES2	0.323387
PGR	CMTM8	0.19095
HAAO	TFAP2B	0.0656591
SNPH	SMO	0.0813258
JARID2	FBXO27	0.108054
MLPH	PLCG1	0.266196
CES1	WISP3	0.069315
ACOXL	CNTN3	0.118011
CEMIP	TMEM45A	0.425464
PGR	RTN4RL1	0.111338
LRRC1	NSUN7	0.102128
LRRC1	GRAMD1B	0.149761
LRRC1	TFAP2B	0.147774
PGR	CES2	0.332669
MLPH	CNTN3	0.176507
MOB3B	FNBP1	0.145142
CERS4	CNTN3	0.162671
MLPH	XK	0.153474
CCDC170	REEP6	0.125062
DNMBP	KYAT1	0.0571158
AMDHD1	FOXA1	0.123168
DNAJC12	SORBS1	0.443774
PGBD5	HAP1	0.0764357
MSX2	GALNT13	0.12198
CISH	CYP26A1	0.144832
SORBS1	MC5R	0.144499
MTUS1	SPA17	0.391152
DNMBP	GCGR	0.0924955
SLC6A7	LIMK1	0.0792482
GALNT13	FOXA1	0.239372
CISH	DNAJC12	0.179248
PDE6H	GALNT13	0.0618689
TUBB4A	TBX1	0.207923
DNAJC12	STK32B	0.10087
HAP1	FOXA1	0.0928702
DNMBP	DNAJC12	0.171638
CISH	LIMK1	0.154903
NECAB3	DNAJC12	0.0688362
ZBTB16	SORBS1	0.130663
REEP6	FOXA1	0.132901
MTUS1	TBX1	0.332033
DNAJC12	FOXA1	0.258507
HACL1	FADS2	0.083942
RASGEF1B	ATG3	0.123456
HACL1	ANKEF1	0.365089
C15orf39	COL27A1	0.131337
COL27A1	CAPN5	0.394609
TMEM132A	ANKEF1	0.378983
HGSNAT	ATG3	0.0917706
SLC25A42	CAB39L	0.261302
FADS2	C2orf40	0.05993
NSUN2	PDGFB	0.152552
CCDC80	MFSD4A	0.120735
NSUN2	CCDC80	0.339075
RERG	CCDC80	0.581355
CCDC80	NGEF	0.298472
SEMA5A	SIAE	0.203028
SLC25A30	CCDC80	0.384111
CYP27B1	RNF157	0.0578158
SLC25A30	RNF157	0.338651
CCDC80	CADM4	0.276324
CCDC80	SIAE	0.487426
GDF11	ITGA9	0.3101
PLIN2	TRPM4	0.280499
FKBP9	FAM149A	0.190033
RNF128	GDF11	0.166985
PLIN2	BCAT2	0.173704
MAP4K4	PLIN2	0.292084
PLIN2	FBP1	0.10877
BCHE	TM6SF1	0.0992872
PLIN2	TM6SF1	0.118223
GDF11	ADRB2	0.258145
PTX3	PLIN2	0.369265
PDIA5	EFHD1	0.624873
PDIA5	ESR1	0.515445
CD55	MARCKSL1	0.640699
TMBIM6	GATA3	0.661984
SMOX	EFHD1	0.448494
SLC3A2	HERPUD1	0.419715
C17orf58	CCNE1	0.310022
PDIA5	E2F1	0.752018
CDC7	GHR	0.538961
CD55	GPX3	0.676413
BLVRB	EFHD1	0.460418
TENM2	CCNE1	0.202966
EPHX1	GHR	0.571027
STK26	CCNE1	0.666327
GMNN	PDIA5	0.475461
STK26	PDIA5	0.676974
PDIA5	HERPUD1	0.748634
TMBIM6	NUP210	0.490564
TMBIM6	GPX3	0.822532
CD55	DHRS3	0.21997
TMBIM6	MAGI2	0.380608
PRLR	DCAF6	0.355516
GALNT16	NOL4L	0.167295
DNAH14	DCAF6	0.221403
BACH2	FBXW2	0.117838
LRRC42	FBXW2	0.146908
SH2D4A	ECHS1	0.326439
ECHS1	FBXW2	0.247572
PRLR	PRUNE2	0.196889
SEMA5A	CAB39L	0.860541
PRLR	TFAP2B	0.820375
SORBS1	BACH2	0.747195
GALNT16	CAPN5	0.737844
ITGA9	CAPN5	0.710635
PDIA5	BCAT2	0.698567
SIAE	CAPN5	0.687964
RNF128	GPX3	0.685311
SORBS1	CAPN5	0.681455
DNAJC12	CCNE1	0.673225
GALNT16	CCNE1	0.649203
CISH	CAPN5	0.648299
MAGI2	CADM4	0.646537
MAP4K4	CCDC80	0.627395
FNBP1	LIMK1	0.618989
SORBS1	DCAF6	0.607234
JARID2	SMOX	0.588217
PLCG1	CADM4	0.585123
C17orf58	MOB3B	0.583945
ITGA9	C2orf40	0.567944
RERG	CERS4	0.566266
GALNT16	FOXA1	0.558748
CD55	BCAT2	0.558651
STK26	RNF157	0.549641
C17orf58	NECAB3	0.546814
ECHS1	TRPM4	0.546171
MTUS1	DCAF6	0.54172
TENM2	FOXA1	0.539757
ANPEP	EFHD1	0.539021
COL27A1	NOL4L	0.538771
SEMA5A	GALNT13	0.533648
C17orf58	ANKEF1	0.530495
CD55	FNBP1	0.530031
MAP4K4	TMEM45A	0.529484
PRLR	NGEF	0.528746
MAP4K4	E2F1	0.526594
DKK1	SLC3A2	0.513508
TMBIM6	ANPEP	0.508155
C17orf58	PDGFB	0.505348
SORBS1	GHR	0.503883
MFSD4A	CNTN3	0.503399
PLIN2	DKK1	0.503212
ESR1	FNBP1	0.502586
COL27A1	ITGA9	0.498978
TENM2	ITGA9	0.497597
MTUS1	MAGI2	0.494088
DKK3	SPA17	0.491387
SORBS1	SIAE	0.485699
CAB39L	CADM4	0.4839
C17orf58	FNBP1	0.478651
SORBS1	MOB3B	0.478399
SORBS1	SMOX	0.469908
NSUN2	CCNE1	0.467674
TMEM45A	PDGFB	0.462238
