# Supplementary material for: Modeling molecular development of breast cancer in canine mammary tumors
Source: HighWire-hosted journal article supplement (doi:10.1101/gr.256388.119), 2020-12-23
Supplement: Supplemental_Table_S4.xlsx [file Supplemental_Table_S4.xlsx]

## Sheet: Supplemental Table S4
Supplemental Table S4: Gene level mutation calls generated from the RNA-Seq data for each tumor sample. Including the sample, chromosome, position, reference and alternate alleles, amino acid changes, predicted functional and clinical impact (snpEff), and COSMIC gene annotation.
Sample	Chromosome	Position	Reference Allele	Alternative Allele	Gene Name	Functional Impact Prediction (snpEff)	Human Clinical Impact Prediction (snpEff)	Amino Acid Change	COSMIC Role In Cancer
10A	10	20543266	G	GCCCT	FBLN1	frameshift_variant	HIGH	p.Glu334fs	NA
10A	10	67451771	C	CT	FBXO48	frameshift_variant	HIGH	p.Glu29fs	NA
10A	15	9009152	CA	C	CC2D1B	frameshift_variant	HIGH	p.Ser742fs	NA
10A	16	27074869	A	T	FGFR1	missense_variant	MODERATE	p.Met537Lys	oncogene / fusion
10A	18	46294340	G	A	IGF2	missense_variant	MODERATE	p.Pro192Leu	NA
10A	18	54102204	C	A	AHNAK	missense_variant	MODERATE	p.Lys1227Asn	NA
10A	1	91391900	A	G	PUM3	stop_gained	HIGH	p.Gln608*	NA
10A	25	44797091	A	G	ATG16L1	missense_variant	MODERATE	p.Arg518Gln	NA
10A	33	26678460	C	A	MYLK	missense_variant	MODERATE	p.Asp1747Tyr	NA
10A	4	58438143	T	C	DCTN4	missense_variant	MODERATE	p.Arg255Cys	NA
10A	5	8596203	T	C	PUS3	missense_variant	MODERATE	p.Arg337Trp	NA
10A	9	22235759	CA	C	TOP2A	frameshift_variant	HIGH	p.Arg1445fs	NA
10A	9	41091926	T	C	UTP6	missense_variant	MODERATE	p.Ala528Val	NA
10A	X	55824345	AT	A	OGT	frameshift_variant&stop_gained	HIGH	p.Glu38fs	NA
10B	15	9887645	T	TA	EPS15	frameshift_variant	HIGH	p.Asn580fs	TSG / fusion
10B	16	27074869	A	T	FGFR1	missense_variant	MODERATE	p.Met537Lys	oncogene / fusion
10B	17	53843909	T	A	ATP1A1	missense_variant	MODERATE	p.Leu966Gln	oncogene / TSG
10B	18	15269754	C	CT	KMT2E	frameshift_variant	HIGH	p.Ser231fs	NA
10B	18	54111403	G	A	AHNAK	missense_variant	MODERATE	p.Val4294Ile	NA
10B	1	91391900	A	G	PUM3	stop_gained	HIGH	p.Gln608*	NA
10B	20	37363008	T	C	BAP1	missense_variant	MODERATE	p.Arg699Trp	TSG
10B	24	26729507	T	TC	KIAA1755	frameshift_variant	HIGH	p.Thr532fs	NA
10B	24	26729509	G	A	KIAA1755	missense_variant	MODERATE	p.Leu531Pro	NA
10B	25	44797091	A	G	ATG16L1	missense_variant	MODERATE	p.Arg518Gln	NA
10B	28	32590207	GA	G	ACADSB	frameshift_variant	HIGH	p.Met253fs	NA
10B	30	11249337	G	A	SPG11	missense_variant	MODERATE	p.Tyr1807His	NA
10B	33	25681261	C	CT	DTX3L	frameshift_variant	HIGH	p.Ser289fs	NA
10B	3	73523019	CT	C	TLR6	frameshift_variant	HIGH	p.Trp774fs	NA
10B	4	58438143	T	C	DCTN4	missense_variant	MODERATE	p.Arg255Cys	NA
10B	5	8596203	T	C	PUS3	missense_variant	MODERATE	p.Arg337Trp	NA
10B	5	24402853	A	AT	CUL5	frameshift_variant	HIGH	p.Asn544fs	NA
10B	5	32761394	G	T	CHD3	missense_variant	MODERATE	p.Val1439Gly	NA
10B	7	815047	A	G	LGR6	missense_variant	MODERATE	p.Leu83Phe	NA
10B	7	38529606	C	CA	PARP1	frameshift_variant	HIGH	p.Phe600fs	NA
10B	8	3190552	G	A	MMP14	missense_variant	MODERATE	p.Glu331Gly	NA
10B	9	6970493	GT	G	COG1	frameshift_variant	HIGH	p.Gln604fs	NA
10B	X	55824345	AT	A	OGT	frameshift_variant&stop_gained	HIGH	p.Glu38fs	NA
10D	15	9887645	TA	T	EPS15	frameshift_variant	HIGH	p.Asn580fs	TSG / fusion
10D	16	27074869	A	T	FGFR1	missense_variant	MODERATE	p.Met537Lys	oncogene / fusion
10D	17	53843909	T	A	ATP1A1	missense_variant	MODERATE	p.Leu966Gln	oncogene / TSG
10D	18	15269754	C	CT	KMT2E	frameshift_variant	HIGH	p.Ser231fs	NA
10D	18	54111403	A	G	AHNAK	missense_variant	MODERATE	p.Val4294Ile	NA
10D	1	91391900	A	G	PUM3	stop_gained	HIGH	p.Gln608*	NA
10D	20	37363008	C	T	BAP1	missense_variant	MODERATE	p.Arg699Trp	TSG
10D	24	26729507	T	TC	KIAA1755	frameshift_variant	HIGH	p.Thr532fs	NA
10D	24	26729509	G	A	KIAA1755	missense_variant	MODERATE	p.Leu531Pro	NA
10D	25	44797091	A	G	ATG16L1	missense_variant	MODERATE	p.Arg518Gln	NA
10D	28	32590207	G	GA	ACADSB	frameshift_variant	HIGH	p.Met253fs	NA
10D	30	11249337	A	G	SPG11	missense_variant	MODERATE	p.Tyr1807His	NA
10D	33	25681261	C	CT	DTX3L	frameshift_variant	HIGH	p.Ser289fs	NA
10D	3	73523019	C	CT	TLR6	frameshift_variant	HIGH	p.Trp774fs	NA
10D	4	58438143	T	C	DCTN4	missense_variant	MODERATE	p.Arg255Cys	NA
10D	5	8596203	T	C	PUS3	missense_variant	MODERATE	p.Arg337Trp	NA
10D	5	24402853	AT	A	CUL5	frameshift_variant	HIGH	p.Asn544fs	NA
10D	5	32761394	T	G	CHD3	missense_variant	MODERATE	p.Val1439Gly	NA
10D	7	815047	A	G	LGR6	missense_variant	MODERATE	p.Leu83Phe	NA
10D	7	38529606	CA	C	PARP1	frameshift_variant	HIGH	p.Phe600fs	NA
10D	8	3190552	G	A	MMP14	missense_variant	MODERATE	p.Glu331Gly	NA
10D	9	6970493	GT	G	COG1	frameshift_variant	HIGH	p.Gln604fs	NA
10D	X	55824345	AT	A	OGT	frameshift_variant&stop_gained	HIGH	p.Glu38fs	NA
11B	10	26681494	T	G	SOX10	missense_variant	MODERATE	p.Ala99Ser	NA
11B	10	26681504	A	G	SOX10	missense_variant	MODERATE	p.Ser102Asn	NA
11B	10	37585663	A	C	NCK2	missense_variant	MODERATE	p.Phe349Val	NA
11B	11	20001694	G	GT	FNIP1	frameshift_variant	HIGH	p.Pro733fs	NA
11B	11	38895291	AT	A	HAUS6	frameshift_variant	HIGH	p.Ser841fs	NA
11B	11	60789409	AGG	A	ABCA1	frameshift_variant	HIGH	p.Pro1371fs	NA
11B	12	934162	T	G	DLA-12	missense_variant	MODERATE	p.Tyr137Asp	NA
11B	12	12041964	GT	G	POLH	frameshift_variant	HIGH	p.Val19fs	NA
11B	12	72020705	C	T	ERMARD	missense_variant&splice_region_variant	MODERATE	p.Met504Thr	NA
11B	16	15527550	A	C	PRKAG2	missense_variant	MODERATE	p.Val533Gly	NA
11B	16	47373286	T	G	DCTD	missense_variant	MODERATE	p.Val142Gly	NA
11B	17	37292219	G	T	PSD4	missense_variant	MODERATE	p.Val953Gly	NA
11B	17	37551272	A	G	IGKV2D-26	missense_variant	MODERATE	p.Arg86Lys	NA
11B	17	59682873	T	G	TARS2	missense_variant	MODERATE	p.Val100Gly	NA
11B	18	49088659	T	A	IGHMBP2	stop_gained	HIGH	p.Lys49*	NA
11B	18	54111752	G	A	AHNAK	missense_variant	MODERATE	p.Gly4410Asp	NA
11B	19	18334426	TA	T	EXOSC9	frameshift_variant	HIGH	p.Phe78fs	NA
11B	1	14654749	AT	A	KIAA1468	frameshift_variant	HIGH	p.Asn241fs	NA
11B	20	8543289	C	T	MTMR14	missense_variant	MODERATE	p.Lys408Arg	NA
11B	20	50614192	T	G	KRI1	missense_variant	MODERATE	p.Val381Gly	NA
11B	20	57631646	T	G	SBNO2	missense_variant	MODERATE	p.Val565Gly	NA
11B	21	631316	GT	G	ARHGAP42	frameshift_variant	HIGH	p.Asn450fs	NA
11B	21	23037148	C	T	SERPINH1	missense_variant	MODERATE	p.Arg194His	NA
11B	22	56981173	A	C	LIG4	missense_variant	MODERATE	p.Cys729Gly	NA
11B	23	10560294	T	G	CTNNB1	missense_variant	MODERATE	p.Asp32Tyr	oncogene / fusion
11B	23	10560334	C	T	CTNNB1	missense_variant	MODERATE	p.Ser45Phe	oncogene / fusion
11B	23	34484772	T	G	ARMC8	missense_variant	MODERATE	p.Val400Gly	NA
11B	24	33183360	GGCT	GGCTGCT	CTSA	disruptive_inframe_insertion	MODERATE	p.Leu38dup	NA
11B	25	14218484	T	A	MTMR6	missense_variant	MODERATE	p.Asn579Lys	NA
11B	25	51571026	C	T	D2HGDH	missense_variant	MODERATE	p.Arg307Trp	NA
11B	26	23180372	T	G	MTMR3	missense_variant	MODERATE	p.Phe870Val	NA
11B	26	29220243	C	T	TRMT2A	missense_variant	MODERATE	p.Arg82Cys	NA
11B	27	5084045	T	G	MCRS1	missense_variant	MODERATE	p.Val341Gly	NA
11B	27	32094617	A	G	ATF7IP	missense_variant	MODERATE	p.Ser990Phe	NA
11B	27	38488545	A	C	NCAPD2	missense_variant	MODERATE	p.Val278Gly	NA
11B	28	1804626	A	C	NCOA4	missense_variant	MODERATE	p.Val413Gly	TSG / fusion
11B	29	36015842	T	G	TMEM64	stop_gained	HIGH	p.Ser108*	NA
11B	2	84103764	T	C	VPS13D	missense_variant	MODERATE	p.Val1252Ile	NA
11B	30	9908918	T	C	UBR1	missense_variant	MODERATE	p.Met1166Ile	NA
11B	30	11137799	GA	G	CTDSPL2	frameshift_variant	HIGH	p.Thr41fs	NA
11B	31	35741147	A	C	BACE2	missense_variant	MODERATE	p.Ala320Asp	NA
11B	32	21065480	A	C	EIF4E	missense_variant	MODERATE	p.Val182Gly	NA
11B	35	18722781	C	CT	MBOAT1	frameshift_variant	HIGH	p.Asp575fs	NA
11B	36	14612083	CA	C	UBR3	frameshift_variant	HIGH	p.Ile991fs	NA
11B	37	25907155	A	C	DNPEP	missense_variant	MODERATE	p.Val151Gly	NA
11B	4	50335664	CT	C	ZBED8	frameshift_variant&stop_gained	HIGH	p.Glu316fs	NA
11B	5	30530375	A	C	MYBBP1A	missense_variant	MODERATE	p.Val841Gly	NA
11B	5	67908246	A	T	COTL1	missense_variant	MODERATE	p.Ser96Arg	NA
11B	5	77119290	C	A	CMTR2	missense_variant	MODERATE	p.Val659Leu	NA
11B	6	18091052	T	G	PPP4C	missense_variant	MODERATE	p.Val137Gly	NA
11B	6	37519352	GC	G	CREBBP	frameshift_variant	HIGH	p.Arg1319fs	oncogene / TSG / fusion
11B	6	37519354	C	CG	CREBBP	frameshift_variant	HIGH	p.Lys1320fs	oncogene / TSG / fusion
11B	8	63133927	CT	C	DDX24	frameshift_variant	HIGH	p.Lys153fs	NA
11B	9	1443797	C	T	RNF213	missense_variant	MODERATE	p.Gly4280Glu	fusion
11B	9	3059857	CT	C	TNRC6C	frameshift_variant	HIGH	p.Gly1130fs	NA
11B	9	4301040	T	G	UBE2O	missense_variant	MODERATE	p.Val127Gly	NA
11B	9	4749416	T	G	WBP2	missense_variant	MODERATE	p.Val133Gly	NA
11B	9	32958523	T	TTCC	TSPOAP1	disruptive_inframe_deletion	MODERATE	p.Glu1255del	NA
11B	9	47703255	GA	G	ATP2A3	frameshift_variant	HIGH	p.Arg838fs	NA
11B	9	49016911	C	CG	NOTCH1	frameshift_variant	HIGH	p.Glu2436fs	oncogene / TSG / fusion
11B	X	42132561	T	C	GRIPAP1	missense_variant	MODERATE	p.Glu302Gly	NA
11B	X	92581618	A	C	C1GALT1C1	missense_variant	MODERATE	p.Val276Gly	NA
11B	X	107044275	T	C	ARHGEF6	missense_variant	MODERATE	p.Glu540Gly	NA
11B	X	122032256	G	A	TKTL1	missense_variant	MODERATE	p.Val480Ile	NA
11B	MT	6523	G	A	MT-CO1	missense_variant	MODERATE	p.Gly392Glu	NA
11C	10	7125324	A	G	XPOT	start_lost	HIGH	p.Met1?	NA
11C	10	12791239	G	A	TSPAN8	missense_variant	MODERATE	p.Ala217Val	NA
11C	10	26681494	T	G	SOX10	missense_variant	MODERATE	p.Ala99Ser	NA
11C	10	26681504	A	G	SOX10	missense_variant	MODERATE	p.Ser102Asn	NA
11C	11	38895291	AT	A	HAUS6	frameshift_variant	HIGH	p.Ser841fs	NA
11C	12	934162	T	G	DLA-12	missense_variant	MODERATE	p.Tyr137Asp	NA
11C	14	25925093	C	CA	PHF14	frameshift_variant	HIGH	p.Met215fs	NA
11C	15	9893323	G	T	EPS15	stop_gained	HIGH	p.Glu694*	TSG / fusion
11C	15	9893324	A	C	EPS15	missense_variant	MODERATE	p.Glu694Ala	TSG / fusion
11C	15	16740161	C	G	SZT2	missense_variant	MODERATE	p.Gln2509His	NA
11C	16	15527550	A	C	PRKAG2	missense_variant	MODERATE	p.Val533Gly	NA
11C	18	12651908	T	G	LAMB1	missense_variant	MODERATE	p.Val224Gly	NA
11C	18	38828233	G	C	TNKS1BP1	missense_variant	MODERATE	p.Gly988Arg	NA
11C	18	47888541	T	G	SHANK2	missense_variant	MODERATE	p.Val378Gly	NA
11C	18	52332915	A	C	CDC42BPG	missense_variant	MODERATE	p.Ser1117Arg	NA
11C	18	54105355	G	A	AHNAK	missense_variant	MODERATE	p.Val2278Ile	NA
11C	20	32408025	T	C	FLNB	missense_variant&splice_region_variant	MODERATE	p.Gln2327Arg	NA
11C	20	37259270	T	C	STAB1	missense_variant	MODERATE	p.Arg1278Gln	NA
11C	20	39141614	A	C	SEMA3F	missense_variant	MODERATE	p.Val324Gly	NA
11C	20	50614192	T	G	KRI1	missense_variant	MODERATE	p.Val381Gly	NA
11C	20	53780243	A	AGCCTG	GTF2F1	frameshift_variant	HIGH	p.Ser570fs	NA
11C	21	33943970	A	T	CTR9	missense_variant	MODERATE	p.Glu859Asp	NA
11C	21	33943972	A	G	CTR9	missense_variant&splice_region_variant	MODERATE	p.Gln860Arg	NA
11C	23	10560294	T	G	CTNNB1	missense_variant	MODERATE	p.Asp32Tyr	oncogene / fusion
11C	24	36156890	C	T	PTGIS	missense_variant	MODERATE	p.Ser101Gly	NA
11C	26	23180372	T	G	MTMR3	missense_variant	MODERATE	p.Phe870Val	NA
11C	27	5084045	T	G	MCRS1	missense_variant	MODERATE	p.Val341Gly	NA
11C	27	33612671	A	C	CDKN1B	missense_variant	MODERATE	p.Val79Gly	TSG
11C	28	9960840	C	CTT	TM9SF3	frameshift_variant	HIGH	p.Ser70fs	NA
11C	28	15342743	T	G	CNNM2	missense_variant	MODERATE	p.Cys288Trp	NA
11C	2	74549512	G	GA	RSRP1	frameshift_variant	HIGH	p.Ile300fs	NA
11C	2	83946283	A	C	VPS13D	missense_variant	MODERATE	p.Cys4175Gly	NA
11C	30	40104123	A	C	FBXO22	missense_variant	MODERATE	p.Val253Gly	NA
11C	31	35741147	A	C	BACE2	missense_variant	MODERATE	p.Ala320Asp	NA
11C	32	21065480	A	C	EIF4E	missense_variant	MODERATE	p.Val182Gly	NA
11C	32	32256179	T	G	ALPK1	missense_variant	MODERATE	p.Val979Gly	NA
11C	35	26387930	A	C	TRIM26	missense_variant	MODERATE	p.Val313Gly	NA
11C	4	67032779	A	C	GHR	missense_variant	MODERATE	p.Val246Gly	NA
11C	4	86916588	CA	C	RETREG1	frameshift_variant	HIGH	p.Ile152fs	NA
11C	5	31759147	A	C	PLD2	missense_variant	MODERATE	p.Val549Gly	NA
11C	5	32209155	CT	C	GABARAP	frameshift_variant	HIGH	p.Tyr49fs	NA
11C	5	64630125	T	G	PIEZO1	missense_variant	MODERATE	p.Val1105Gly	NA
11C	6	40228158	T	G	RGS11	missense_variant	MODERATE	p.Val192Gly	NA
11C	8	3190552	A	G	MMP14	missense_variant	MODERATE	p.Glu331Gly	NA
11C	8	46545262	G	T	PSEN1	missense_variant	MODERATE	p.Leu261Phe	NA
11C	8	63133927	CT	C	DDX24	frameshift_variant	HIGH	p.Lys153fs	NA
11C	9	4301040	T	G	UBE2O	missense_variant	MODERATE	p.Val127Gly	NA
11C	X	20536649	TGAA	T	POLA1	conservative_inframe_deletion	MODERATE	p.Lys1425del	NA
11C	X	107044275	T	C	ARHGEF6	missense_variant	MODERATE	p.Glu540Gly	NA
11C	JH373316.1	100806	T	C	AEBP1	missense_variant	MODERATE	p.Asp844Gly	NA
11C	JH374180.1	2504	A	C	CD1A8	missense_variant	MODERATE	p.His107Gln	NA
11E	11	38895291	AT	A	HAUS6	frameshift_variant	HIGH	p.Ser841fs	NA
11E	11	60789409	AGG	A	ABCA1	frameshift_variant	HIGH	p.Pro1371fs	NA
11E	15	61102519	C	T	TMEM192	missense_variant	MODERATE	p.Arg117His	NA
11E	16	8849415	G	A	PARP12	missense_variant	MODERATE	p.Ala355Thr	NA
11E	18	54110896	C	T	AHNAK	missense_variant	MODERATE	p.Leu4125Phe	NA
11E	19	37217376	G	T	MGAT5	missense_variant	MODERATE	p.Gly312Val	NA
11E	1	14654749	AT	A	KIAA1468	frameshift_variant	HIGH	p.Asn241fs	NA
11E	1	82246975	G	A	PCSK5	missense_variant	MODERATE	p.Thr759Met	NA
11E	20	46977674	C	A	NOTCH3	missense_variant	MODERATE	p.Pro1923Thr	NA
11E	21	32948907	CA	C	SWAP70	frameshift_variant	HIGH	p.Asn102fs	NA
11E	23	10560294	T	G	CTNNB1	missense_variant	MODERATE	p.Asp32Tyr	oncogene / fusion
11E	24	23607549	G	T	ITCH	missense_variant	MODERATE	p.Phe619Val	NA
11E	26	37910090	GC	G	PTEN	frameshift_variant	HIGH	p.Asn312fs	TSG
11E	28	21921210	G	T	SMC3	missense_variant	MODERATE	p.Arg726Met	NA
11E	2	59392367	G	A	HERPUD1	missense_variant	MODERATE	p.Ala273Val	fusion
11E	30	29919309	CA	C	HACD3	frameshift_variant	HIGH	p.Lys464fs	NA
11E	33	6472591	G	GT	FILIP1L	frameshift_variant	HIGH	p.Asn602fs	NA
11E	3	12968212	G	GT	CAST	frameshift_variant	HIGH	p.Thr113fs	NA
11E	7	29409438	G	A	NME7	missense_variant	MODERATE	p.Arg334Gln	NA
11E	7	42428202	C	A	EFNA4	missense_variant	MODERATE	p.Ser176Ala	NA
11E	9	52520730	C	T	RAPGEF1	stop_gained	HIGH	p.Arg351*	NA
11E	X	58342506	C	A	ABCB7	missense_variant	MODERATE	p.Glu577Asp	NA
11E	MT	5613	G	A	MT-CO1	missense_variant	MODERATE	p.Ala89Thr	NA
11G	10	25693226	C	A	SYNGR1	missense_variant	MODERATE	p.Val136Gly	NA
11G	11	21180148	GT	G	AFF4	frameshift_variant	HIGH	p.Gln537fs	oncogene / fusion
11G	11	38895291	AT	A	HAUS6	frameshift_variant	HIGH	p.Ser841fs	NA
11G	11	60785441	A	C	ABCA1	missense_variant	MODERATE	p.Gly1433Trp	NA
11G	12	3040840	CAGG	C	ITPR3	disruptive_inframe_deletion	MODERATE	p.Glu2108del	NA
11G	14	3978995	C	A	EXOC4	missense_variant	MODERATE	p.Val388Gly	NA
11G	15	3397505	A	AT	MACF1	frameshift_variant	HIGH	p.Ile6254fs	NA
11G	17	37292219	G	T	PSD4	missense_variant	MODERATE	p.Val953Gly	NA
11G	18	38828642	G	A	TNKS1BP1	missense_variant	MODERATE	p.Arg1124Gln	NA
11G	18	42077074	G	T	KBTBD4	missense_variant	MODERATE	p.Val78Gly	NA
11G	18	50131234	C	A	SSH3	missense_variant	MODERATE	p.Ser239Ile	NA
11G	18	52332915	A	C	CDC42BPG	missense_variant	MODERATE	p.Ser1117Arg	NA
11G	18	54109393	G	A	AHNAK	missense_variant	MODERATE	p.Ala3624Thr	NA
11G	18	54110896	C	T	AHNAK	missense_variant	MODERATE	p.Leu4125Phe	NA
11G	19	53240169	A	G	STAM2	missense_variant	MODERATE	p.Ile164Thr	NA
11G	1	14654749	AT	A	KIAA1468	frameshift_variant	HIGH	p.Asn241fs	NA
11G	1	108127370	G	A	LIG1	missense_variant	MODERATE	p.Ala364Thr	NA
11G	1	110437222	G	C	RELB	missense_variant	MODERATE	p.Pro540Arg	NA
11G	21	32471816	C	A	DENND5A	missense_variant	MODERATE	p.Val1027Gly	NA
11G	23	10560294	T	G	CTNNB1	missense_variant	MODERATE	p.Asp32Tyr	oncogene / fusion
11G	24	5349868	G	GA	RRBP1	frameshift_variant	HIGH	p.Val146fs	NA
11G	24	23607549	G	T	ITCH	missense_variant	MODERATE	p.Phe619Val	NA
11G	29	36015842	T	G	TMEM64	stop_gained	HIGH	p.Ser108*	NA
11G	2	32191431	A	T	PITRM1	missense_variant	MODERATE	p.Met238Leu	NA
11G	2	69429697	C	T	COL16A1	missense_variant	MODERATE	p.Ala755Val	NA
11G	2	85211848	C	T	CASZ1	missense_variant	MODERATE	p.Ala1281Val	NA
11G	30	9297558	T	C	GANC	missense_variant	MODERATE	p.Leu506Pro	NA
11G	30	9908918	T	C	UBR1	missense_variant	MODERATE	p.Met1166Ile	NA
11G	30	24093114	C	T	MYO1E	missense_variant	MODERATE	p.Glu863Lys	NA
11G	33	17381811	C	CA	GTPBP8	frameshift_variant	HIGH	p.Thr206fs	NA
11G	35	14719816	CA	C	JARID2	frameshift_variant	HIGH	p.Trp690fs	NA
11G	36	14612083	CA	C	UBR3	frameshift_variant	HIGH	p.Ile991fs	NA
11G	5	32708612	G	T	KDM6B	missense_variant	MODERATE	p.Cys1488Gly	NA
11G	5	32761394	G	T	CHD3	missense_variant	MODERATE	p.Val1439Gly	NA
11G	5	82842403	G	GT	CDH5	frameshift_variant	HIGH	p.Thr373fs	NA
11G	6	12567481	G	T	TNRC18	missense_variant	MODERATE	p.Tyr1469Asp	NA
11G	6	39345059	A	T	CLCN7	missense_variant	MODERATE	p.Thr209Ser	NA
11G	7	41672727	G	C	SEMA4A	missense_variant	MODERATE	p.Arg656Pro	NA
11G	7	41898989	G	T	RIT1	missense_variant	MODERATE	p.Phe96Val	NA
11G	7	42428202	C	A	EFNA4	missense_variant	MODERATE	p.Ser176Ala	NA
11G	7	75289729	GA	GAA	ANKRD12	frameshift_variant	HIGH	p.Asn932fs	NA
11G	7	75289729	GA	GAA	ANKRD12	frameshift_variant	HIGH	p.Asn909fs	NA
11G	8	3190552	A	G	MMP14	missense_variant	MODERATE	p.Glu331Gly	NA
11G	8	3208864	CCCT	C	LRP10	disruptive_inframe_deletion	MODERATE	p.Leu11del	NA
11G	8	47944188	G	C	YLPM1	missense_variant	MODERATE	p.Lys2100Asn	NA
11G	8	63133927	CT	C	DDX24	frameshift_variant	HIGH	p.Lys153fs	NA
11G	9	15645604	A	G	ABCA9	missense_variant	MODERATE	p.Phe47Leu	NA
11G	9	42644217	G	GA	SLC46A1	frameshift_variant	HIGH	p.Ser393fs	NA
11G	9	47703255	GA	G	ATP2A3	frameshift_variant	HIGH	p.Arg838fs	NA
11G	X	20536649	TGAA	T	POLA1	conservative_inframe_deletion	MODERATE	p.Lys1425del	NA
11G	X	44949836	G	A	KDM5C	missense_variant	MODERATE	p.Val1148Met	TSG
11H	14	25925093	C	CA	PHF14	frameshift_variant	HIGH	p.Met215fs	NA
11H	17	59901218	C	CT	CTSS	frameshift_variant	HIGH	p.Arg228fs	NA
11H	17	60889855	AT	A	THEM4	frameshift_variant	HIGH	p.Asn331fs	NA
11H	17	60889855	AT	A	THEM4	frameshift_variant	HIGH	p.Asn236fs	NA
11H	18	45198836	C	T	CD151	missense_variant	MODERATE	p.Arg195Trp	NA
11H	18	52332915	A	C	CDC42BPG	missense_variant	MODERATE	p.Ser1117Arg	NA
11H	20	8306323	C	CA	EMC3	frameshift_variant	HIGH	p.Thr91fs	NA
11H	20	41489963	C	A	PTPN23	missense_variant	MODERATE	p.Val643Gly	NA
11H	24	2045491	C	A	XRN2	missense_variant	MODERATE	p.Tyr918Asp	NA
11H	24	15874966	G	GT	MCM8	frameshift_variant	HIGH	p.Thr366fs	NA
11H	24	47669506	T	G	PCMTD2	missense_variant	MODERATE	p.Val297Gly	NA
11H	29	16650044	C	T	CSPP1	missense_variant	MODERATE	p.Ala535Val	NA
11H	29	36015842	T	G	TMEM64	stop_gained	HIGH	p.Ser108*	NA
11H	2	69429697	C	T	COL16A1	missense_variant	MODERATE	p.Ala755Val	NA
11H	36	7422191	G	GT	DPP4	frameshift_variant	HIGH	p.Leu516fs	NA
11H	37	598395	TA	T	PMS1	frameshift_variant	HIGH	p.Asn708fs	NA
11H	5	32708612	G	T	KDM6B	missense_variant	MODERATE	p.Cys1488Gly	NA
11H	5	67908246	A	T	COTL1	missense_variant	MODERATE	p.Ser96Arg	NA
11H	7	42428202	C	A	EFNA4	missense_variant	MODERATE	p.Ser176Ala	NA
11H	8	46843260	G	T	HEATR4	missense_variant	MODERATE	p.Thr133Pro	NA
11H	9	32958523	T	TTCC	TSPOAP1	disruptive_inframe_deletion	MODERATE	p.Glu1255del	NA
11I	10	7125324	A	G	XPOT	start_lost	HIGH	p.Met1?	NA
11I	10	37585663	A	C	NCK2	missense_variant	MODERATE	p.Phe349Val	NA
11I	11	38895291	AT	A	HAUS6	frameshift_variant	HIGH	p.Ser841fs	NA
11I	12	934162	T	G	DLA-12	missense_variant	MODERATE	p.Tyr137Asp	NA
11I	12	12041964	GT	G	POLH	frameshift_variant	HIGH	p.Val19fs	NA
11I	13	46751765	G	A	PDGFRA	missense_variant	MODERATE	p.Arg376Gln	oncogene / fusion
11I	14	5614206	C	CA	PODXL	frameshift_variant	HIGH	p.Asn81fs	NA
11I	14	25925093	C	CA	PHF14	frameshift_variant	HIGH	p.Met215fs	NA
11I	15	35999466	CA	C	ELK3	frameshift_variant	HIGH	p.Pro289fs	NA
11I	17	33884579	G	GA	EML4	frameshift_variant	HIGH	p.Ser400fs	fusion
11I	17	59682873	T	G	TARS2	missense_variant	MODERATE	p.Val100Gly	NA
11I	18	52332915	A	C	CDC42BPG	missense_variant	MODERATE	p.Ser1117Arg	NA
11I	1	14654749	AT	A	KIAA1468	frameshift_variant	HIGH	p.Asn241fs	NA
11I	1	75482378	G	GA	RMI1	frameshift_variant	HIGH	p.Ser406fs	NA
11I	20	37259270	T	C	STAB1	missense_variant	MODERATE	p.Arg1278Gln	NA
11I	20	57631646	T	G	SBNO2	missense_variant	MODERATE	p.Val565Gly	NA
11I	22	56981173	A	C	LIG4	missense_variant	MODERATE	p.Cys729Gly	NA
11I	23	10560294	T	G	CTNNB1	missense_variant	MODERATE	p.Asp32Tyr	oncogene / fusion
11I	23	10560310	C	A	CTNNB1	missense_variant	MODERATE	p.Ser37Tyr	oncogene / fusion
11I	23	34494197	CA	C	ARMC8	frameshift_variant	HIGH	p.Ile503fs	NA
11I	24	24507665	A	G	ERGIC3	missense_variant	MODERATE	p.Ser352Gly	NA
11I	28	1804626	A	C	NCOA4	missense_variant	MODERATE	p.Val413Gly	TSG / fusion
11I	29	4480133	C	T	RB1CC1	missense_variant	MODERATE	p.Arg1215Lys	NA
11I	2	84103764	T	C	VPS13D	missense_variant	MODERATE	p.Val1252Ile	NA
11I	30	29919309	CA	C	HACD3	frameshift_variant	HIGH	p.Lys464fs	NA
11I	32	32256179	T	G	ALPK1	missense_variant	MODERATE	p.Val979Gly	NA
11I	4	58496728	C	T	SYNPO	missense_variant	MODERATE	p.Ala785Thr	NA
11I	4	59031139	GT	G	HMGXB3	frameshift_variant	HIGH	p.Thr657fs	NA
11I	5	24979119	G	A	CWF19L2	missense_variant	MODERATE	p.Glu269Lys	NA
11I	5	30530375	A	C	MYBBP1A	missense_variant	MODERATE	p.Val841Gly	NA
11I	5	67908246	A	T	COTL1	missense_variant	MODERATE	p.Ser96Arg	NA
11I	6	40228158	T	G	RGS11	missense_variant	MODERATE	p.Val192Gly	NA
11I	6	58615888	G	GT	ZNF326	frameshift_variant	HIGH	p.Asn295fs	NA
11I	7	65243365	GT	G	RBBP8	frameshift_variant	HIGH	p.Asn356fs	NA
11I	8	3190552	A	G	MMP14	missense_variant	MODERATE	p.Glu331Gly	NA
11I	9	53971643	T	C	USP20	missense_variant	MODERATE	p.Gln692Arg	NA
11I	X	20536649	TGAA	T	POLA1	conservative_inframe_deletion	MODERATE	p.Lys1425del	NA
11I	X	107044275	T	C	ARHGEF6	missense_variant	MODERATE	p.Glu540Gly	NA
11J	10	1684626	G	A	DTX3	missense_variant	MODERATE	p.Glu11Gly	NA
11J	10	30974797	G	T	BPIFC	missense_variant	MODERATE	p.Ser26Ile	NA
11J	10	48629588	CCAG	C	EPAS1	conservative_inframe_deletion	MODERATE	p.Ser478del	oncogene / TSG
11J	11	38895291	AT	A	HAUS6	frameshift_variant	HIGH	p.Ser841fs	NA
11J	12	42738698	CT	C	IBTK	frameshift_variant	HIGH	p.Arg470fs	NA
11J	14	3978995	C	A	EXOC4	missense_variant	MODERATE	p.Val388Gly	NA
11J	15	6937502	C	A	ZMYM1	missense_variant	MODERATE	p.Val21Gly	NA
11J	15	18434649	G	GT	CHD8	frameshift_variant	HIGH	p.Asn2375fs	NA
11J	17	37292219	G	T	PSD4	missense_variant	MODERATE	p.Val953Gly	NA
11J	17	37551192	G	T	IGKV2D-26	missense_variant	MODERATE	p.Asn59Lys	NA
11J	17	37551272	A	G	IGKV2D-26	missense_variant	MODERATE	p.Arg86Lys	NA
11J	17	37551278	C	G	IGKV2D-26	missense_variant	MODERATE	p.Ser88Thr	NA
11J	17	60889855	AT	ATT	THEM4	frameshift_variant	HIGH	p.Asn331fs	NA
11J	17	60889855	AT	ATT	THEM4	frameshift_variant	HIGH	p.Asn236fs	NA
11J	18	49085733	C	CTCCCGG	IGHMBP2	disruptive_inframe_deletion	MODERATE	p.Asp128_Arg129del	NA
11J	18	52332915	A	C	CDC42BPG	missense_variant	MODERATE	p.Ser1117Arg	NA
11J	1	4226668	G	A	TSHZ1	missense_variant	MODERATE	p.Arg923Trp	NA
11J	1	14654749	AT	A	KIAA1468	frameshift_variant	HIGH	p.Asn241fs	NA
11J	1	18378190	G	T	FECH	missense_variant	MODERATE	p.Val300Gly	NA
11J	1	113141221	A	C	LTBP4	missense_variant	MODERATE	p.Tyr382Asp	NA
11J	20	37259270	T	C	STAB1	missense_variant	MODERATE	p.Arg1278Gln	NA
11J	20	40774918	G	T	NME6	missense_variant	MODERATE	p.Val73Gly	NA
11J	20	57456185	C	A	MUM1	missense_variant	MODERATE	p.Ala471Ser	NA
11J	20	57715573	G	T	WDR18	missense_variant	MODERATE	p.Gln175Pro	NA
11J	21	32471816	C	A	DENND5A	missense_variant	MODERATE	p.Val1027Gly	NA
11J	21	50733236	GA	G	MS4A1	frameshift_variant	HIGH	p.Glu238fs	NA
11J	23	7191724	CA	C	GOLGA4	frameshift_variant	HIGH	p.Ile1666fs	NA
11J	23	10560294	T	G	CTNNB1	missense_variant	MODERATE	p.Asp32Tyr	oncogene / fusion
11J	23	10560334	C	T	CTNNB1	missense_variant	MODERATE	p.Ser45Phe	oncogene / fusion
11J	24	24507665	A	G	ERGIC3	missense_variant	MODERATE	p.Ser352Gly	NA
11J	25	14218484	T	A	MTMR6	missense_variant	MODERATE	p.Asn579Lys	NA
11J	26	29220243	C	T	TRMT2A	missense_variant	MODERATE	p.Arg82Cys	NA
11J	28	8914033	C	CT	SORBS1	frameshift_variant	HIGH	p.Ala358fs	NA
11J	33	29460336	G	GA	UBXN7	frameshift_variant	HIGH	p.Ser324fs	NA
11J	3	70866546	A	T	EVC2	stop_gained	HIGH	p.Tyr484*	NA
11J	4	59031139	GT	G	HMGXB3	frameshift_variant	HIGH	p.Thr657fs	NA
11J	5	56471811	C	A	ACAP3	missense_variant	MODERATE	p.Val355Gly	NA
11J	6	37519352	GC	G	CREBBP	frameshift_variant	HIGH	p.Arg1319fs	oncogene / TSG / fusion
11J	6	37519354	C	CG	CREBBP	frameshift_variant	HIGH	p.Lys1320fs	oncogene / TSG / fusion
11J	7	27409076	AT	A	PRRC2C	frameshift_variant	HIGH	p.Asn1492fs	NA
11J	7	41672727	G	C	SEMA4A	missense_variant	MODERATE	p.Arg656Pro	NA
11J	7	41898989	G	T	RIT1	missense_variant	MODERATE	p.Phe96Val	NA
11J	7	42428202	C	A	EFNA4	missense_variant	MODERATE	p.Ser176Ala	NA
11J	9	11722818	G	A	CCDC47	stop_gained	HIGH	p.Arg271*	NA
11J	9	49016911	C	CG	NOTCH1	frameshift_variant	HIGH	p.Glu2436fs	oncogene / TSG / fusion
11J	X	20536649	TGAA	T	POLA1	conservative_inframe_deletion	MODERATE	p.Lys1425del	NA
11J	X	122032256	G	A	TKTL1	missense_variant	MODERATE	p.Val480Ile	NA
12B	12	934331	G	A	DLA-12	missense_variant	MODERATE	p.Arg193Gln	NA
12B	12	2658888	G	A	RXRB	missense_variant	MODERATE	p.Arg432Cys	NA
12B	15	16620511	G	A	PTPRF	missense_variant	MODERATE	p.Ala357Val	NA
12B	18	38809850	G	A	SSRP1	missense_variant	MODERATE	p.Arg528His	NA
12B	18	54110896	T	C	AHNAK	missense_variant	MODERATE	p.Leu4125Phe	NA
12B	20	37102229	G	A	GLT8D1	missense_variant	MODERATE	p.Val322Ile	NA
12B	20	53780243	A	AGCCTG	GTF2F1	frameshift_variant	HIGH	p.Ser570fs	NA
12B	24	20139426	T	C	SLC52A3	missense_variant	MODERATE	p.Arg422Cys	NA
12B	24	47476928	A	G	PRPF6	missense_variant	MODERATE	p.Arg662His	NA
12B	27	33840052	C	T	BORCS5	missense_variant	MODERATE	p.Arg135His	NA
12B	2	73738022	G	A	SH3BGRL3	missense_variant	MODERATE	p.Arg116Trp	NA
12B	34	17079846	G	A	AP2M1	missense_variant	MODERATE	p.Ala396Thr	NA
12B	36	30488645	G	A	COL3A1	missense_variant	MODERATE	p.Ala19Thr	NA
12B	38	21322910	G	A	UFC1	missense_variant	MODERATE	p.Ala2Val	NA
12B	4	25461783	G	C	VDAC2	missense_variant	MODERATE	p.Gly276Arg	NA
12B	7	738365	G	A	LGR6	missense_variant	MODERATE	p.Thr532Met	NA
12B	7	19459119	C	A	C1orf27	missense_variant	MODERATE	p.Ser242Tyr	NA
12B	8	63473866	C	T	SERPINA9	missense_variant	MODERATE	p.Val360Ile	NA
12B	8	70062879	G	A	DYNC1H1	missense_variant	MODERATE	p.Ala4432Thr	NA
12B	MT	9223	G	A	COX3	missense_variant	MODERATE	p.Gly194Arg	NA
12D	10	1624051	G	A	DCTN2	missense_variant	MODERATE	p.Ser123Leu	NA
12D	10	20542368	G	A	FBLN1	missense_variant	MODERATE	p.Ala366Val	NA
12D	11	73559771	A	G	CDK5RAP2	missense_variant	MODERATE	p.Ser1641Pro	NA
12D	12	934331	G	A	DLA-12	missense_variant	MODERATE	p.Arg193Gln	NA
12D	16	33707556	AATC	A	GTF2E2	conservative_inframe_deletion	MODERATE	p.Ser36del	NA
12D	18	54110896	T	C	AHNAK	missense_variant	MODERATE	p.Leu4125Phe	NA
12D	18	54111403	G	A	AHNAK	missense_variant	MODERATE	p.Val4294Ile	NA
12D	1	113305607	G	A	PLD3	missense_variant	MODERATE	p.Ala442Val	NA
12D	24	47476928	A	G	PRPF6	missense_variant	MODERATE	p.Arg662His	NA
12D	25	34665616	C	T	CCAR2	missense_variant	MODERATE	p.Arg248His	NA
12D	27	2124139	G	A	EIF4B	stop_gained	HIGH	p.Arg408*	NA
12D	28	32220483	A	G	DMBT1	missense_variant	MODERATE	p.Ala365Thr	NA
12D	36	30488645	G	A	COL3A1	missense_variant	MODERATE	p.Ala19Thr	NA
12D	3	25717778	C	T	SSBP2	missense_variant	MODERATE	p.Ala75Val	NA
12D	5	24099435	A	G	KDELC2	missense_variant	MODERATE	p.Ala379Thr	NA
12D	5	31631137	G	A	KIF1C	stop_gained	HIGH	p.Arg171*	NA
12D	5	39533538	T	C	UBB	missense_variant	MODERATE	p.Gly228Asp	NA
12D	6	12423476	G	A	ACTB	missense_variant	MODERATE	p.Ala310Thr	NA
12D	6	31064973	C	CA	ZC3H7A	frameshift_variant	HIGH	p.Asn826fs	NA
12D	7	30878056	T	C	CREG1	missense_variant	MODERATE	p.Ala148Val	NA
12D	9	20396674	C	T	COASY	splice_donor_variant&intron_variant	HIGH		NA
12D	9	21159196	G	A	KRT17	missense_variant	MODERATE	p.Arg251His	NA
12D	X	1411530	C	T	CD99	missense_variant	MODERATE	p.Ala36Val	NA
12D	X	122061795	C	T	FLNA	missense_variant	MODERATE	p.Arg76Trp	NA
12D	X	122103188	G	A	DNASE1L1	missense_variant	MODERATE	p.Arg170Cys	NA
13B	10	416775	G	T	ERBB3	missense_variant	MODERATE	p.Met124Ile	oncogene
13B	10	26681494	T	G	SOX10	missense_variant	MODERATE	p.Ala99Ser	NA
13B	13	15023313	C	T	TRPS1	stop_gained	HIGH	p.Trp1123*	NA
13B	17	37551167	A	G	IGKV2D-26	missense_variant	MODERATE	p.Arg51His	NA
13B	17	37551270	C	G	IGKV2D-26	missense_variant	MODERATE	p.Asp85Glu	NA
13B	17	37551300	G	T	IGKV2D-26	missense_variant	MODERATE	p.Asp95Glu	NA
13B	18	49085733	CTCCCGG	C	IGHMBP2	disruptive_inframe_deletion	MODERATE	p.Asp128_Arg129del	NA
13B	20	42242110	C	A	LTF	missense_variant	MODERATE	p.Asn91Lys	NA
13B	20	42260354	A	G	LTF	missense_variant	MODERATE	p.Lys602Glu	NA
13B	24	24507665	A	G	ERGIC3	missense_variant	MODERATE	p.Ser352Gly	NA
13B	24	24641107	C	CT	RBM39	frameshift_variant	HIGH	p.Ser38fs	NA
13B	25	48145403	A	G	MLPH	missense_variant	MODERATE	p.Met75Val	NA
13B	4	8558584	C	T	C1orf198	missense_variant	MODERATE	p.Arg305Cys	NA
13B	4	73476028	G	GT	RAI14	frameshift_variant	HIGH	p.Arg273fs	NA
13B	5	49978117	G	A	CYP2J2	missense_variant	MODERATE	p.Ala407Thr	NA
13B	9	60750718	A	T	DAB2IP	missense_variant	MODERATE	p.Asp412Glu	NA
13B	X	118989202	G	A	MTMR1	missense_variant	MODERATE	p.Gln538Arg	NA
13C	17	37551270	C	G	IGKV2D-26	missense_variant	MODERATE	p.Asp85Glu	NA
13C	1	66051605	GT	G	ECHDC1	frameshift_variant	HIGH	p.Leu41fs	NA
13C	1	113764175	A	G	SUPT5H	missense_variant	MODERATE	p.Arg711Cys	NA
13C	20	42242110	C	A	LTF	missense_variant	MODERATE	p.Asn91Lys	NA
13C	20	42260354	A	G	LTF	missense_variant	MODERATE	p.Lys602Glu	NA
13C	2	71490861	G	A	EPB41	missense_variant	MODERATE	p.Ser79Leu	NA
13C	33	25651175	A	AT	PARP9	frameshift_variant	HIGH	p.Asn608fs	NA
13C	3	12788503	T	C	ERAP2	missense_variant	MODERATE	p.Lys686Arg	NA
13C	4	15031501	T	C	JMJD1C	missense_variant	MODERATE	p.Glu2024Lys	NA
13C	5	49978117	G	A	CYP2J2	missense_variant	MODERATE	p.Ala407Thr	NA
13C	7	26387210	A	G	SUCO	stop_gained	HIGH	p.Gln1123*	NA
13C	8	4107261	C	CT	PCK2	frameshift_variant	HIGH	p.Gly581fs	NA
13C	8	68797388	A	G	BEGAIN	missense_variant	MODERATE	p.Leu311Phe	NA
13C	9	60750718	A	T	DAB2IP	missense_variant	MODERATE	p.Asp412Glu	NA
13D	11	25829381	C	T	KIF20A	missense_variant	MODERATE	p.Ile175Thr	NA
13D	1	66051605	GT	G	ECHDC1	frameshift_variant	HIGH	p.Leu41fs	NA
13D	1	113764175	A	G	SUPT5H	missense_variant	MODERATE	p.Arg711Cys	NA
13D	20	42242110	C	A	LTF	missense_variant	MODERATE	p.Asn91Lys	NA
13D	20	42260354	A	G	LTF	missense_variant	MODERATE	p.Lys602Glu	NA
13D	25	48150741	AC	A	MLPH	frameshift_variant	HIGH	p.His223fs	NA
13D	2	71490861	G	A	EPB41	missense_variant	MODERATE	p.Ser79Leu	NA
13D	5	49978117	G	A	CYP2J2	missense_variant	MODERATE	p.Ala407Thr	NA
13D	8	4250148	A	AGG	RABGGTA	frameshift_variant	HIGH	p.Thr9fs	NA
13D	MT	8159	C	T	MT-ATP6	stop_gained	HIGH	p.Arg66*	NA
13E	17	13167442	AT	A	SMC6	frameshift_variant	HIGH	p.Ile416fs	NA
13E	18	49088688	A	T	IGHMBP2	missense_variant	MODERATE	p.Val39Glu	NA
13E	1	89114514	C	T	CBWD2	missense_variant	MODERATE	p.Glu85Lys	NA
13E	1	110437222	G	C	RELB	missense_variant	MODERATE	p.Pro540Arg	NA
13E	1	113764175	A	G	SUPT5H	missense_variant	MODERATE	p.Arg711Cys	NA
13E	20	42242110	C	A	LTF	missense_variant	MODERATE	p.Asn91Lys	NA
13E	20	42260354	A	G	LTF	missense_variant	MODERATE	p.Lys602Glu	NA
13E	25	2058853	G	GT	PROSER1	frameshift_variant	HIGH	p.Ser366fs	NA
13E	27	38426521	C	T	CHD4	missense_variant	MODERATE	p.Pro1135Leu	oncogene
13E	28	24645838	G	A	PLEKHS1	missense_variant	MODERATE	p.Ser8Asn	NA
13E	28	24645840	C	A	PLEKHS1	missense_variant	MODERATE	p.Pro9Thr	NA
13E	2	69429697	T	C	COL16A1	missense_variant	MODERATE	p.Ala755Val	NA
13E	2	71490861	G	A	EPB41	missense_variant	MODERATE	p.Ser79Leu	NA
13E	30	38408245	A	T	SNUPN	missense_variant	MODERATE	p.Tyr199Phe	NA
13E	35	3450702	TC	T	TUBB2A	frameshift_variant	HIGH	p.Asp31fs	NA
13E	35	3569423	G	A	SLC22A23	missense_variant	MODERATE	p.Arg87Trp	NA
13E	4	8413098	G	GT	ARV1	frameshift_variant	HIGH	p.Pro184fs	NA
13E	4	40062007	C	T	UBTD2	missense_variant	MODERATE	p.Arg157Cys	NA
13E	5	49978117	G	A	CYP2J2	missense_variant	MODERATE	p.Ala407Thr	NA
13E	7	26387210	A	G	SUCO	stop_gained	HIGH	p.Gln1123*	NA
13E	9	15595240	C	G	ABCA9	missense_variant	MODERATE	p.Ser1355Thr	NA
13E	9	15645604	A	G	ABCA9	missense_variant	MODERATE	p.Phe47Leu	NA
13E	9	60750718	A	T	DAB2IP	missense_variant	MODERATE	p.Asp412Glu	NA
13E	X	122083124	T	C	FLNA	missense_variant	MODERATE	p.Arg2642Cys	NA
13F	10	17382492	C	T	BRD1	missense_variant	MODERATE	p.Arg740Trp	NA
13F	12	1329530	GA	G	SLC44A4	frameshift_variant	HIGH	p.Phe616fs	NA
13F	14	43339149	T	A	GARS	splice_donor_variant&intron_variant	HIGH		NA
13F	17	20181896	T	A	RAB10	missense_variant	MODERATE	p.Leu14Gln	NA
13F	1	41294733	CA	C	PLEKHG1	frameshift_variant	HIGH	p.Pro1340fs	NA
13F	1	113764175	A	G	SUPT5H	missense_variant	MODERATE	p.Arg711Cys	NA
13F	20	42242110	C	A	LTF	missense_variant	MODERATE	p.Asn91Lys	NA
13F	20	42260354	A	G	LTF	missense_variant	MODERATE	p.Lys602Glu	NA
13F	25	48150741	AC	A	MLPH	frameshift_variant	HIGH	p.His223fs	NA
13F	2	71490861	G	A	EPB41	missense_variant	MODERATE	p.Ser79Leu	NA
13F	5	49978117	G	A	CYP2J2	missense_variant	MODERATE	p.Ala407Thr	NA
13F	5	61623767	C	T	ERRFI1	missense_variant	MODERATE	p.Cys369Tyr	NA
13F	5	66295361	G	C	FOXC2	missense_variant	MODERATE	p.Glu111Asp	NA
13F	6	18166278	T	G	CORO1A	missense_variant	MODERATE	p.Val247Gly	NA
13F	7	26387210	A	G	SUCO	stop_gained	HIGH	p.Gln1123*	NA
13F	8	68797388	A	G	BEGAIN	missense_variant	MODERATE	p.Leu311Phe	NA
13F	9	60750718	A	T	DAB2IP	missense_variant	MODERATE	p.Asp412Glu	NA
13F	X	81166927	T	A	PRPS1	missense_variant	MODERATE	p.Glu195Asp	NA
13F	X	122083124	T	C	FLNA	missense_variant	MODERATE	p.Arg2642Cys	NA
13G	11	25829381	C	T	KIF20A	missense_variant	MODERATE	p.Ile175Thr	NA
13G	11	39037643	CTTA	C	FTH1	disruptive_inframe_deletion	MODERATE	p.Tyr41del	NA
13G	11	39037858	G	A	FTH1	missense_variant	MODERATE	p.Val111Met	NA
13G	12	1329530	GA	G	SLC44A4	frameshift_variant	HIGH	p.Phe616fs	NA
13G	15	9009152	C	CA	CC2D1B	frameshift_variant	HIGH	p.Ser742fs	NA
13G	17	20181896	T	A	RAB10	missense_variant	MODERATE	p.Leu14Gln	NA
13G	17	37550444	G	A	IGKV2D-26	missense_variant	MODERATE	p.Lys2Arg	NA
13G	1	113764175	A	G	SUPT5H	missense_variant	MODERATE	p.Arg711Cys	NA
13G	20	42242110	C	A	LTF	missense_variant	MODERATE	p.Asn91Lys	NA
13G	20	42260354	A	G	LTF	missense_variant	MODERATE	p.Lys602Glu	NA
13G	22	48149393	GA	G	IPO5	frameshift_variant	HIGH	p.Ile99fs	NA
13G	26	31210171	A	T	TOP3B	missense_variant	MODERATE	p.Cys161Ser	NA
13G	2	71490861	G	A	EPB41	missense_variant	MODERATE	p.Ser79Leu	NA
13G	5	49978117	G	A	CYP2J2	missense_variant	MODERATE	p.Ala407Thr	NA
13G	6	9500863	C	T	COPS6	missense_variant	MODERATE	p.Gly335Asp	NA
13G	7	26387210	A	G	SUCO	stop_gained	HIGH	p.Gln1123*	NA
13G	7	29409438	G	A	NME7	missense_variant	MODERATE	p.Arg334Gln	NA
13G	9	60750718	A	T	DAB2IP	missense_variant	MODERATE	p.Asp412Glu	NA
14B	10	11566997	C	T	CCT2	missense_variant	MODERATE	p.Ala270Val	NA
14B	10	17031416	C	T	SELENOO	missense_variant	MODERATE	p.Ala139Thr	NA
14B	10	20542368	G	A	FBLN1	missense_variant	MODERATE	p.Ala366Val	NA
14B	18	49085733	C	CTCCCGG	IGHMBP2	disruptive_inframe_deletion	MODERATE	p.Asp128_Arg129del	NA
14B	18	54111403	A	G	AHNAK	missense_variant	MODERATE	p.Val4294Ile	NA
14B	1	99409160	A	AG	TRIM28	frameshift_variant	HIGH	p.Leu814fs	NA
14B	27	41954731	C	T	FKBP4	missense_variant	MODERATE	p.Gly167Ser	NA
14B	2	74549512	G	GA	RSRP1	frameshift_variant	HIGH	p.Ile300fs	NA
14B	3	25209454	G	A	RPS23	missense_variant	MODERATE	p.Arg17Gln	NA
14B	5	61498034	C	T	PER3	missense_variant	MODERATE	p.Ala1119Val	NA
14B	7	29409438	G	A	NME7	missense_variant	MODERATE	p.Arg334Gln	NA
14B	7	29409516	C	T	NME7	missense_variant	MODERATE	p.Pro360Leu	NA
14B	8	14034070	G	GA	PSMA6	frameshift_variant	HIGH	p.Val183fs	NA
14C	10	26681504	G	A	SOX10	missense_variant	MODERATE	p.Ser102Asn	NA
14C	12	36727798	G	C	COL12A1	missense_variant	MODERATE	p.Met2906Ile	NA
14C	13	3892988	A	AT	UBR5	frameshift_variant	HIGH	p.Asn2664fs	TSG
14C	16	46100095	T	C	IRF2	missense_variant	MODERATE	p.Ala59Val	NA
14C	18	16848293	CT	C	PSMC2	frameshift_variant	HIGH	p.Ala269fs	NA
14C	18	49680840	A	G	KMT5B	missense_variant	MODERATE	p.Glu413Lys	NA
14C	1	55529517	C	CGAG,CGAGGAG	AFDN	conservative_inframe_insertion	MODERATE	p.Glu1705dup	NA
14C	1	66051605	GT	G	ECHDC1	frameshift_variant	HIGH	p.Leu41fs	NA
14C	20	36657467	T	G	DCP1A	missense_variant	MODERATE	p.Gln569His	NA
14C	20	36657469	C	T	DCP1A	missense_variant	MODERATE	p.Val570Ala	NA
14C	23	44012547	C	T	CP	missense_variant	MODERATE	p.Arg436Gln	NA
14C	24	24507665	A	G	ERGIC3	missense_variant	MODERATE	p.Ser352Gly	NA
14C	27	41954731	C	T	FKBP4	missense_variant	MODERATE	p.Gly167Ser	NA
14C	2	21612214	GT	G	RPP38	frameshift_variant	HIGH	p.Pro278fs	NA
14C	2	59328441	T	C	NLRC5	missense_variant	MODERATE	p.Arg612His	NA
14C	30	11335597	G	A	B2M	missense_variant	MODERATE	p.Arg107His	TSG
14C	33	30690664	C	T	ACAP2	missense_variant	MODERATE	p.Tyr298His	NA
14C	35	16682874	T	C	KIF13A	missense_variant	MODERATE	p.Ala406Thr	NA
14C	37	14229272	T	C	PARD3B	missense_variant	MODERATE	p.Pro1006Leu	NA
14C	38	6732237	A	G	RGS18	missense_variant	MODERATE	p.Thr99Ile	NA
14C	4	58176018	A	G	TNIP1	missense_variant	MODERATE	p.Arg142His	NA
14C	5	32421218	T	C	POLR2A	missense_variant	MODERATE	p.Ala946Val	NA
14C	6	9109271	T	G	LRCH4	missense_variant	MODERATE	p.Ser237Ala	NA
14C	6	28467141	A	G	NTAN1	missense_variant&splice_region_variant	MODERATE	p.Ala184Val	NA
14C	7	78991709	T	C	MYO5B	missense_variant	MODERATE	p.Thr1469Met	NA
14C	8	1110363	A	G	TC2N	missense_variant	MODERATE	p.Arg184Trp	NA
14C	9	1589278	C	T	EIF4A3	missense_variant	MODERATE	p.Ala257Val	NA
14C	9	21158450	A	C	KRT17	missense_variant	MODERATE	p.Asn210Thr	NA
14C	9	23468617	T	C	PIP4K2B	missense_variant	MODERATE	p.Ala376Val	NA
14C	9	53121000	A	G	ABL1	missense_variant	MODERATE	p.Pro967Ser	oncogene / fusion
14D	11	16025608	C	CA	LMNB1	frameshift_variant	HIGH	p.Gln72fs	NA
14D	13	59438781	C	T	CSN2	missense_variant	MODERATE	p.Met190Ile	NA
14D	18	54111403	A	G	AHNAK	missense_variant	MODERATE	p.Val4294Ile	NA
14D	21	40647640	T	C	SAA1	missense_variant	MODERATE	p.Asp93Asn	NA
14D	21	40647648	T	C	SAA1	missense_variant	MODERATE	p.Arg90Lys	NA
14D	23	44012547	C	T	CP	missense_variant	MODERATE	p.Arg436Gln	NA
14D	24	41585969	T	C	AURKA	missense_variant	MODERATE	p.Asn400Ser	NA
14D	5	32421218	T	C	POLR2A	missense_variant	MODERATE	p.Ala946Val	NA
14D	6	9109271	T	G	LRCH4	missense_variant	MODERATE	p.Ser237Ala	NA
14D	7	78592994	CCAGCAG	C,CCAG	CXXC1	conservative_inframe_deletion	MODERATE	p.Gln168_Gln169del	NA
14D	MT	7966	G	A	MT-ATP6	start_lost	HIGH	p.Met1?	NA
14D	MT	12069	T	C	ND5	missense_variant	MODERATE	p.Trp98Arg	NA
14E	11	26137141	AT	A	HSPA9	frameshift_variant	HIGH	p.Asn188fs	NA
14E	12	36727798	G	C	COL12A1	missense_variant	MODERATE	p.Met2906Ile	NA
14E	14	43339149	T	A	GARS	splice_donor_variant&intron_variant	HIGH		NA
14E	15	14104625	C	CT	LRRC41	frameshift_variant	HIGH	p.Ser134fs	NA
14E	16	46100095	T	C	IRF2	missense_variant	MODERATE	p.Ala59Val	NA
14E	18	54111403	A	G	AHNAK	missense_variant	MODERATE	p.Val4294Ile	NA
14E	1	66051605	GT	G	ECHDC1	frameshift_variant	HIGH	p.Leu41fs	NA
14E	1	107419672	C	T	FTL	missense_variant	MODERATE	p.Ala16Thr	NA
14E	1	111903762	G	A	CEACAM1	missense_variant	MODERATE	p.Gln139Arg	NA
14E	20	33608578	CA	C	ARHGEF3	frameshift_variant	HIGH	p.Gln354fs	NA
14E	23	44012547	C	T	CP	missense_variant	MODERATE	p.Arg436Gln	NA
14E	24	24507665	A	G	ERGIC3	missense_variant	MODERATE	p.Ser352Gly	NA
14E	25	29991036	G	A	CLU	missense_variant	MODERATE	p.Gly132Asp	NA
14E	26	24099625	G	C	SMTN	missense_variant	MODERATE	p.Glu594Gln	NA
14E	28	8798788	A	AT	PDLIM1	frameshift_variant	HIGH	p.Ile28fs	NA
14E	31	35741147	C	A	BACE2	missense_variant	MODERATE	p.Ala320Asp	NA
14E	38	22228312	C	T	TAGLN2	missense_variant	MODERATE	p.Ala24Val	NA
14E	6	40615097	G	A	ATP5F1	missense_variant	MODERATE	p.Arg208Cys	NA
14E	7	29409438	G	A	NME7	missense_variant	MODERATE	p.Arg334Gln	NA
14E	7	29409516	C	T	NME7	missense_variant	MODERATE	p.Pro360Leu	NA
14E	7	78991709	T	C	MYO5B	missense_variant	MODERATE	p.Thr1469Met	NA
14E	8	1110363	A	G	TC2N	missense_variant	MODERATE	p.Arg184Trp	NA
14E	9	6970493	G	GT	COG1	frameshift_variant	HIGH	p.Gln604fs	NA
14E	MT	8157	G	A	MT-ATP6	missense_variant	MODERATE	p.Gly65Glu	NA
14F	10	20542368	G	A	FBLN1	missense_variant	MODERATE	p.Ala366Val	NA
14F	11	74260474	C	T	GSN	missense_variant	MODERATE	p.Arg395Trp	NA
14F	12	36727798	G	C	COL12A1	missense_variant	MODERATE	p.Met2906Ile	NA
14F	13	3892988	A	AT	UBR5	frameshift_variant	HIGH	p.Asn2664fs	TSG
14F	14	44352074	G	C	PDE1C	missense_variant	MODERATE	p.Val17Leu	NA
14F	15	18434649	G	GT	CHD8	frameshift_variant	HIGH	p.Asn2375fs	NA
14F	16	46100095	T	C	IRF2	missense_variant	MODERATE	p.Ala59Val	NA
14F	17	23876730	T	C	YPEL5	missense_variant	MODERATE	p.Arg93Cys	NA
14F	1	111909886	A	G	CEACAM1	missense_variant	MODERATE	p.Asn347Ser	NA
14F	20	33608578	CA	C	ARHGEF3	frameshift_variant	HIGH	p.Gln354fs	NA
14F	20	36657467	T	G	DCP1A	missense_variant	MODERATE	p.Gln569His	NA
14F	20	36657469	C	T	DCP1A	missense_variant	MODERATE	p.Val570Ala	NA
14F	23	44012547	C	T	CP	missense_variant	MODERATE	p.Arg436Gln	NA
14F	26	37906323	C	T	PTEN	stop_gained	HIGH	p.Gln192*	TSG
14F	2	21612214	GT	G	RPP38	frameshift_variant	HIGH	p.Pro278fs	NA
14F	30	11335597	G	A	B2M	missense_variant	MODERATE	p.Arg107His	TSG
14F	33	30690664	C	T	ACAP2	missense_variant	MODERATE	p.Tyr298His	NA
14F	37	28901725	CA	C	ACSL3	frameshift_variant	HIGH	p.Asn97fs	fusion
14F	38	6732237	A	G	RGS18	missense_variant	MODERATE	p.Thr99Ile	NA
14F	4	54929763	A	G	GEMIN5	missense_variant	MODERATE	p.Ala1218Thr	NA
14F	5	32421218	T	C	POLR2A	missense_variant	MODERATE	p.Ala946Val	NA
14F	8	1110363	A	G	TC2N	missense_variant	MODERATE	p.Arg184Trp	NA
14F	8	3252206	A	C	PRMT5	missense_variant	MODERATE	p.Trp404Cys	NA
14F	9	21158450	A	C	KRT17	missense_variant	MODERATE	p.Asn210Thr	NA
14F	X	55633700	T	C	ITGB1BP2	missense_variant	MODERATE	p.Pro63Leu	NA
14F	X	122079384	G	A	FLNA	missense_variant	MODERATE	p.Asn2161Asp	NA
15B	12	72020705	C	T	ERMARD	missense_variant&splice_region_variant	MODERATE	p.Met504Thr	NA
15B	15	3296704	G	T	PABPC4	missense_variant	MODERATE	p.Val334Gly	NA
15B	15	14104625	C	CT	LRRC41	frameshift_variant	HIGH	p.Ser134fs	NA
15B	17	37550447	C	T	IGKV2D-26	missense_variant	MODERATE	p.Phe3Ser	NA
15B	18	17687864	CA	C	PTPN12	frameshift_variant	HIGH	p.Ile683fs	NA
15B	20	32408025	C	T	FLNB	missense_variant&splice_region_variant	MODERATE	p.Gln2327Arg	NA
15B	20	42239674	C	CA	LTF	frameshift_variant	HIGH	p.Cys38fs	NA
15B	29	18841560	T	A	SULF1	missense_variant	MODERATE	p.Glu305Val	NA
15B	2	66858928	AT	A	ABCC11	frameshift_variant&splice_region_variant	HIGH	p.Ser979fs	NA
15B	2	69235821	T	C	PTP4A2	stop_gained	HIGH	p.Arg154*	NA
15B	5	32209155	CT	C	GABARAP	frameshift_variant	HIGH	p.Tyr49fs	NA
15B	9	21158450	A	C	KRT17	missense_variant	MODERATE	p.Asn210Thr	NA
15B	9	22549930	A	G	PSMD3	missense_variant	MODERATE	p.Arg106Cys	NA
15B	9	31754982	CTTT	C	COIL	conservative_inframe_insertion	MODERATE	p.Lys161dup	NA
15B	9	47703255	GA	G	ATP2A3	frameshift_variant	HIGH	p.Arg838fs	NA
15B	MT	3045	TG	T	MT-ND1	frameshift_variant	HIGH	p.Gly101fs	NA
15C	11	25830345	T	C	KIF20A	missense_variant	MODERATE	p.His372Tyr	NA
15C	12	12643468	G	C	HSP90AB1	missense_variant	MODERATE	p.Leu370Phe	fusion
15C	15	9009152	CA	C	CC2D1B	frameshift_variant	HIGH	p.Ser742fs	NA
15C	16	27074869	T	A	FGFR1	missense_variant	MODERATE	p.Met537Lys	oncogene / fusion
15C	18	17687864	CA	C	PTPN12	frameshift_variant	HIGH	p.Ile683fs	NA
15C	18	47499831	T	C	SHANK2	missense_variant	MODERATE	p.Thr160Met	NA
15C	20	36970181	T	G	SFMBT1	stop_gained	HIGH	p.Glu715*	NA
15C	21	40704188	T	G	SAA1	missense_variant	MODERATE	p.Arg89Leu	NA
15C	21	40704190	T	C	SAA1	missense_variant	MODERATE	p.Leu90Phe	NA
15C	21	40704202	A	G	SAA1	missense_variant	MODERATE	p.Asp94Asn	NA
15C	26	29572295	C	T	2020-09-05	missense_variant	MODERATE	p.Arg90His	NA
15C	2	42359128	CA	C	SPINK5	frameshift_variant	HIGH	p.Asn1015fs	NA
15C	2	66858928	AT	A	ABCC11	frameshift_variant&splice_region_variant	HIGH	p.Ser979fs	NA
15C	2	69235821	T	C	PTP4A2	stop_gained	HIGH	p.Arg154*	NA
15C	8	47287956	T	C	ALDH6A1	missense_variant	MODERATE	p.Ala338Thr	NA
15C	9	21158450	A	C	KRT17	missense_variant	MODERATE	p.Asn210Thr	NA
15C	9	22549930	A	G	PSMD3	missense_variant	MODERATE	p.Arg106Cys	NA
15C	9	31754982	CTTT	C	COIL	conservative_inframe_insertion	MODERATE	p.Lys161dup	NA
15C	X	20424526	T	C	POLA1	missense_variant	MODERATE	p.Arg1365Cys	NA
16A	11	16025608	C	CA	LMNB1	frameshift_variant	HIGH	p.Gln72fs	NA
16A	12	10339051	T	TCTG	MDFI	conservative_inframe_deletion	MODERATE	p.Cys204del	NA
16A	15	14104625	CT	C	LRRC41	frameshift_variant	HIGH	p.Ser134fs	NA
16A	16	8849428	G	A	PARP12	missense_variant	MODERATE	p.Arg359His	NA
16A	17	22700915	T	TTTG	PPP1CB	intragenic_variant	MODIFIER		NA
16A	18	49085733	CTCCCGG	C	IGHMBP2	disruptive_inframe_deletion	MODERATE	p.Asp128_Arg129del	NA
16A	18	54111403	A	G	AHNAK	missense_variant	MODERATE	p.Val4294Ile	NA
16A	1	112420439	T	C	RPS19	missense_variant	MODERATE	p.Arg109His	NA
16A	20	37562176	T	C	ALAS1	missense_variant	MODERATE	p.Gly181Ser	NA
16A	25	29998820	A	G	CLU	missense_variant	MODERATE	p.Arg441His	NA
16A	25	37747378	G	A	CUL3	missense_variant	MODERATE	p.Ala539Val	NA
16A	28	32251495	G	A	DMBT1	missense_variant	MODERATE	p.Ala944Thr	NA
16A	30	11335597	A	G	B2M	missense_variant	MODERATE	p.Arg107His	TSG
16A	5	31707265	A	G	CHRNE	missense_variant	MODERATE	p.Val443Ile	NA
16A	5	31707266	G	T	CHRNE	missense_variant	MODERATE	p.Val443Gly	NA
16A	8	71458314	G	A	ZFYVE21	missense_variant	MODERATE	p.Ala97Thr	NA
16A	9	3059857	C	CT	TNRC6C	frameshift_variant	HIGH	p.Gly1130fs	NA
16A	9	49786216	G	A	RPL7A	missense_variant	MODERATE	p.Arg249His	NA
16A	MT	10118	G	A	ND4L	missense_variant	MODERATE	p.Glu70Lys	NA
16A	MT	12671	C	CA	ND5	frameshift_variant	HIGH	p.Ile301fs	NA
16A	MT	14432	A	G	MT-CYB	missense_variant	MODERATE	p.Ala84Thr	NA
16B	10	1340225	TCTG	T	LRP1	conservative_inframe_deletion	MODERATE	p.Leu4436del	TSG
16B	10	1340225	TCTG	T	LRP1	conservative_inframe_deletion	MODERATE	p.Leu4420del	TSG
16B	10	1340225	TCTG	T	LRP1	downstream_gene_variant	MODIFIER		TSG
16B	10	16997902	G	A	HDAC10	missense_variant	MODERATE	p.Arg196His	NA
16B	12	934331	G	A	DLA-12	missense_variant	MODERATE	p.Arg193Gln	NA
16B	12	985354	A	G	DLA-64	missense_variant	MODERATE	p.Ile218Val	NA
16B	12	10339051	T	TCTG	MDFI	conservative_inframe_deletion	MODERATE	p.Cys204del	NA
16B	15	14104625	CT	C	LRRC41	frameshift_variant	HIGH	p.Ser134fs	NA
16B	16	8849428	G	A	PARP12	missense_variant	MODERATE	p.Arg359His	NA
16B	16	27074869	T	A	FGFR1	missense_variant	MODERATE	p.Met537Lys	oncogene / fusion
16B	17	37551110	C	T	IGKV2D-26	missense_variant	MODERATE	p.Ala32Val	NA
16B	18	46468005	A	G	CD81	missense_variant	MODERATE	p.Arg33His	NA
16B	1	106390863	G	A	MYH14	missense_variant	MODERATE	p.Arg1569Trp	NA
16B	1	112420439	T	C	RPS19	missense_variant	MODERATE	p.Arg109His	NA
16B	20	37562176	T	C	ALAS1	missense_variant	MODERATE	p.Gly181Ser	NA
16B	30	39809514	T	G	SCAPER	missense_variant	MODERATE	p.Gln1365His	NA
16B	34	26479758	A	T	SMC4	missense_variant	MODERATE	p.Asn662Tyr	NA
16B	3	47974667	C	T	SLCO3A1	missense_variant	MODERATE	p.Val436Ile	NA
16B	4	24785203	C	A	ADK	missense_variant	MODERATE	p.Ile107Leu	NA
16B	6	24258020	C	T	TMEM159	missense_variant	MODERATE	p.Gly121Asp	NA
16B	7	2208016	C	T	KIF21B	missense_variant	MODERATE	p.Ala637Val	NA
16B	7	29409438	A	G	NME7	missense_variant	MODERATE	p.Arg334Gln	NA
16B	7	39984473	T	A	WDR26	missense_variant	MODERATE	p.Ile203Leu	NA
16B	9	3059857	C	CT	TNRC6C	frameshift_variant	HIGH	p.Gly1130fs	NA
16B	X	106864860	AGAG	A	HTATSF1	conservative_inframe_insertion	MODERATE	p.Glu551dup	NA
16B	MT	4476	G	A	MT-ND2	missense_variant	MODERATE	p.Gly188Asp	NA
16B	MT	7067	G	A	MT-CO2	missense_variant	MODERATE	p.Ala12Thr	NA
16B	MT	14432	A	G	MT-CYB	missense_variant	MODERATE	p.Ala84Thr	NA
16C	12	10339051	T	TCTG	MDFI	conservative_inframe_deletion	MODERATE	p.Cys204del	NA
16C	17	37550459	T	C	IGKV2D-26	missense_variant	MODERATE	p.Leu7Pro	NA
16C	1	112725175	T	C	AXL	missense_variant	MODERATE	p.Ala108Thr	NA
16C	1	114232771	T	C	SIRT2	missense_variant	MODERATE	p.Pro266Ser	NA
16C	20	37562176	T	C	ALAS1	missense_variant	MODERATE	p.Gly181Ser	NA
16C	20	45065049	A	G	JAK3	missense_variant	MODERATE	p.Val1010Ile	oncogene
16C	25	29998820	A	G	CLU	missense_variant	MODERATE	p.Arg441His	NA
16C	2	81131392	G	A	PADI2	missense_variant	MODERATE	p.Arg153Gln	NA
16C	30	39809514	T	G	SCAPER	missense_variant	MODERATE	p.Gln1365His	NA
16C	38	22228312	C	T	TAGLN2	missense_variant	MODERATE	p.Ala24Val	NA
16C	3	7959086	A	G	C5orf30	missense_variant	MODERATE	p.Thr182Met	NA
16C	5	32209155	C	CT	GABARAP	frameshift_variant	HIGH	p.Tyr49fs	NA
16C	8	63133913	T	C	DDX24	missense_variant	MODERATE	p.Gly157Glu	NA
16C	9	24280035	A	G	CDK5RAP3	stop_gained	HIGH	p.Trp45*	NA
16C	X	19364615	G	C	PRDX4	missense_variant	MODERATE	p.Ser15Cys	NA
16C	X	106864860	A	AGAG	HTATSF1	conservative_inframe_insertion	MODERATE	p.Glu551dup	NA
16C	X	118989202	G	A	MTMR1	missense_variant	MODERATE	p.Gln538Arg	NA
16C	MT	7322	G	A	MT-CO2	missense_variant	MODERATE	p.Val97Met	NA
16C	MT	8160	G	A	MT-ATP6	missense_variant	MODERATE	p.Arg66Gln	NA
16C	MT	14432	A	G	MT-CYB	missense_variant	MODERATE	p.Ala84Thr	NA
16D	11	22903738	C	T	DDX46	missense_variant	MODERATE	p.Ala994Val	NA
16D	12	934331	G	A	DLA-12	missense_variant	MODERATE	p.Arg193Gln	NA
16D	12	934997	G	A	DLA-12	missense_variant	MODERATE	p.Val218Ile	NA
16D	12	10339051	T	TCTG	MDFI	conservative_inframe_deletion	MODERATE	p.Cys204del	NA
16D	15	49643125	C	T	GATB	missense_variant	MODERATE	p.Arg307His	NA
16D	18	42397454	G	A	PACSIN3	stop_gained	HIGH	p.Trp284*	NA
16D	18	46468005	A	G	CD81	missense_variant	MODERATE	p.Arg33His	NA
16D	18	54111403	A	G	AHNAK	missense_variant	MODERATE	p.Val4294Ile	NA
16D	18	54111421	A	G	AHNAK	missense_variant	MODERATE	p.Asp4300Asn	NA
16D	1	107419672	C	T	FTL	missense_variant	MODERATE	p.Ala16Thr	NA
16D	1	112420439	T	C	RPS19	missense_variant	MODERATE	p.Arg109His	NA
16D	21	26630860	C	T	RRM1	stop_gained	HIGH	p.Arg742*	NA
16D	24	24507665	A	G	ERGIC3	missense_variant	MODERATE	p.Ser352Gly	NA
16D	2	69530266	C	T	TINAGL1	missense_variant	MODERATE	p.Gly94Ser	NA
16D	30	7952190	G	A	ZFYVE19	missense_variant	MODERATE	p.Ala361Thr	NA
16D	30	11335597	A	G	B2M	missense_variant	MODERATE	p.Arg107His	TSG
16D	35	7519061	C	T	DSP	missense_variant	MODERATE	p.Thr1553Met	NA
16D	37	10013963	G	GA	BZW1	frameshift_variant	HIGH	p.Asn317fs	NA
16D	38	22228312	C	T	TAGLN2	missense_variant	MODERATE	p.Ala24Val	NA
16D	5	32209155	C	CT	GABARAP	frameshift_variant	HIGH	p.Tyr49fs	NA
16D	5	41636507	G	T	TOM1L2	missense_variant	MODERATE	p.Gly361Val	NA
16D	6	55521265	G	GA	BCAR3	frameshift_variant	HIGH	p.Asn724fs	NA
16D	7	64408500	T	C	LAMA3	missense_variant	MODERATE	p.Arg3238Gln	NA
16D	9	20407665	G	A	NAGLU	missense_variant	MODERATE	p.Ala702Val	NA
16D	MT	14432	A	G	MT-CYB	missense_variant	MODERATE	p.Ala84Thr	NA
16F	10	1340225	TCTG	T	LRP1	conservative_inframe_deletion	MODERATE	p.Leu4436del	TSG
16F	10	1340225	TCTG	T	LRP1	conservative_inframe_deletion	MODERATE	p.Leu4420del	TSG
16F	10	1340225	TCTG	T	LRP1	downstream_gene_variant	MODIFIER		TSG
16F	12	934331	G	A	DLA-12	missense_variant	MODERATE	p.Arg193Gln	NA
16F	12	10339051	T	TCTG	MDFI	conservative_inframe_deletion	MODERATE	p.Cys204del	NA
16F	17	22700915	T	TTTG	PPP1CB	intragenic_variant	MODIFIER		NA
16F	17	59901218	C	CT	CTSS	frameshift_variant	HIGH	p.Arg228fs	NA
16F	18	46468005	A	G	CD81	missense_variant	MODERATE	p.Arg33His	NA
16F	18	54111421	A	G	AHNAK	missense_variant	MODERATE	p.Asp4300Asn	NA
16F	19	12190434	G	GT	JADE1	frameshift_variant	HIGH	p.Asn794fs	NA
16F	1	49258360	G	A	IGF2R	missense_variant	MODERATE	p.Val2310Ile	NA
16F	1	112420439	T	C	RPS19	missense_variant	MODERATE	p.Arg109His	NA
16F	20	33623191	G	A	ARHGEF3	missense_variant	MODERATE	p.Gly580Glu	NA
16F	20	50945154	C	T	EIF3G	missense_variant	MODERATE	p.Arg219Trp	NA
16F	22	4552418	G	A	ESD	missense_variant	MODERATE	p.Ala47Thr	NA
16F	25	29998820	A	G	CLU	missense_variant	MODERATE	p.Arg441His	NA
16F	27	5084860	C	T	MCRS1	missense_variant	MODERATE	p.Arg423Trp	NA
16F	2	37057930	A	T	NDFIP1	missense_variant	MODERATE	p.Val193Asp	NA
16F	30	11335597	A	G	B2M	missense_variant	MODERATE	p.Arg107His	TSG
16F	37	10013963	G	GA	BZW1	frameshift_variant	HIGH	p.Asn317fs	NA
16F	38	22228312	C	T	TAGLN2	missense_variant	MODERATE	p.Ala24Val	NA
16F	4	3558319	C	G	LGALS8	missense_variant	MODERATE	p.Trp88Ser	NA
16F	4	3558323	C	T	LGALS8	missense_variant	MODERATE	p.Gly87Arg	NA
16F	5	32209155	C	CT	GABARAP	frameshift_variant	HIGH	p.Tyr49fs	NA
16F	5	58157937	C	T	TPRG1L	missense_variant	MODERATE	p.Ala100Val	NA
16F	6	62720083	CA	C	BCL10	frameshift_variant	HIGH	p.Ile46fs	TSG / fusion
16F	9	3059857	C	CT	TNRC6C	frameshift_variant	HIGH	p.Gly1130fs	NA
16F	X	40773920	G	A	RBM10	missense_variant	MODERATE	p.Thr651Ala	TSG
16F	X	106864860	AGAG	A	HTATSF1	conservative_inframe_insertion	MODERATE	p.Glu551dup	NA
16F	MT	2853	G	A	MT-ND1	missense_variant	MODERATE	p.Gly36Glu	NA
16F	MT	14432	A	G	MT-CYB	missense_variant	MODERATE	p.Ala84Thr	NA
17B	10	45329673	T	G	KANSL3	missense_variant	MODERATE	p.Lys142Asn	NA
17B	11	50160859	C	T	DNAJA1	missense_variant	MODERATE	p.His211Tyr	NA
17B	12	934167	G	T	DLA-12	missense_variant	MODERATE	p.Ser138Arg	NA
17B	12	1329530	G	GA	SLC44A4	frameshift_variant	HIGH	p.Phe616fs	NA
17B	12	2225297	G	T	DLA-DQA1	missense_variant	MODERATE	p.Ile177Arg	NA
17B	12	33297235	TA	T	SMAP1	frameshift_variant	HIGH	p.Ala212fs	NA
17B	13	15224762	A	G	TRPS1	missense_variant	MODERATE	p.Thr59Met	NA
17B	17	13167442	A	AT	SMC6	frameshift_variant	HIGH	p.Ile416fs	NA
17B	17	53843909	T	A	ATP1A1	missense_variant	MODERATE	p.Leu966Gln	oncogene / TSG
17B	17	60889855	AT	ATT	THEM4	frameshift_variant	HIGH	p.Asn331fs	NA
17B	17	60889855	AT	ATT	THEM4	frameshift_variant	HIGH	p.Asn236fs	NA
17B	18	54111403	G	A	AHNAK	missense_variant	MODERATE	p.Val4294Ile	NA
17B	1	103044769	A	C	TMC4	missense_variant	MODERATE	p.Gln236Pro	NA
17B	21	26571050	A	G	STIM1	missense_variant	MODERATE	p.Gly250Glu	NA
17B	23	7191724	CA	C	GOLGA4	frameshift_variant	HIGH	p.Ile1666fs	NA
17B	24	29127988	A	T	TOP1	missense_variant	MODERATE	p.Asp124Glu	fusion
17B	24	32173700	A	G	WISP2	missense_variant	MODERATE	p.Arg230His	NA
17B	25	29991036	G	A	CLU	missense_variant	MODERATE	p.Gly132Asp	NA
17B	26	31210171	A	T	TOP3B	missense_variant	MODERATE	p.Cys161Ser	NA
17B	28	14907521	A	ACG	NFKB2	frameshift_variant	HIGH	p.Leu473fs	oncogene / TSG / fusion
17B	28	26709689	T	C	GFRA1	missense_variant	MODERATE	p.Ala455Thr	NA
17B	28	28698063	CT	C	FAM204A	frameshift_variant	HIGH	p.Lys235fs	NA
17B	2	28084972	C	T	GATA3	missense_variant	MODERATE	p.Arg119Lys	oncogene / TSG
17B	2	77761594	G	A	ECE1	missense_variant	MODERATE	p.Arg167His	NA
17B	3	85355947	GA	G	CCDC149	frameshift_variant	HIGH	p.Leu264fs	NA
17B	4	9813700	T	C	ACTA1	missense_variant	MODERATE	p.Ser200Pro	NA
17B	5	47656662	AT	A	USP1	frameshift_variant	HIGH	p.Asn662fs	NA
17B	5	67908246	T	A	COTL1	missense_variant	MODERATE	p.Ser96Arg	NA
17B	5	76304341	A	G	AARS	stop_gained	HIGH	p.Gln73*	NA
17B	6	21482946	AT	A	RBBP6	frameshift_variant	HIGH	p.Ile1222fs	NA
17B	8	31446522	C	T	KTN1	missense_variant	MODERATE	p.Ile1288Thr	fusion
17B	8	39144095	T	C	PLEKHG3	missense_variant	MODERATE	p.Arg418Trp	NA
17B	8	59714186	A	C	PTPN21	missense_variant	MODERATE	p.Val892Leu	NA
17B	9	19942166	GT	G	NBR1	frameshift_variant	HIGH	p.Gln322fs	NA
17B	X	81166927	T	A	PRPS1	missense_variant	MODERATE	p.Glu195Asp	NA
17B	MT	8159	T	C	MT-ATP6	stop_gained	HIGH	p.Arg66*	NA
17B	MT	9065	G	A	COX3	missense_variant	MODERATE	p.Gly141Glu	NA
17D	12	1329530	G	GA	SLC44A4	frameshift_variant	HIGH	p.Phe616fs	NA
17D	12	2225297	G	T	DLA-DQA1	missense_variant	MODERATE	p.Ile177Arg	NA
17D	13	4367227	C	T	AZIN1	missense_variant	MODERATE	p.Ser367Gly	NA
17D	13	15224762	A	G	TRPS1	missense_variant	MODERATE	p.Thr59Met	NA
17D	17	13167442	A	AT	SMC6	frameshift_variant	HIGH	p.Ile416fs	NA
17D	17	48758267	A	G	DCTN1	missense_variant	MODERATE	p.Asp1227Asn	fusion
17D	18	53241996	CT	C	RTN3	frameshift_variant	HIGH	p.Ala1041fs	NA
17D	18	54111403	G	A	AHNAK	missense_variant	MODERATE	p.Val4294Ile	NA
17D	1	66051605	GT	G	ECHDC1	frameshift_variant	HIGH	p.Leu41fs	NA
17D	1	93835654	G	C	RIC1	missense_variant	MODERATE	p.Ser1005Thr	NA
17D	1	104990256	T	C	PPP2R1A	missense_variant	MODERATE	p.Glu191Gly	TSG
17D	23	7191724	CA	C	GOLGA4	frameshift_variant	HIGH	p.Ile1666fs	NA
17D	23	8735650	G	A	WDR48	missense_variant	MODERATE	p.Lys106Glu	NA
17D	23	44090413	A	G	TM4SF18	missense_variant	MODERATE	p.Ala102Val	NA
17D	24	29127988	A	T	TOP1	missense_variant	MODERATE	p.Asp124Glu	fusion
17D	28	14388982	A	G	MGEA5	missense_variant	MODERATE	p.Arg608Trp	NA
17D	28	26709689	T	C	GFRA1	missense_variant	MODERATE	p.Ala455Thr	NA
17D	2	62429192	AT	A	CHD9	frameshift_variant	HIGH	p.Tyr647fs	NA
17D	30	11335597	G	A	B2M	missense_variant	MODERATE	p.Arg107His	TSG
17D	5	47656662	AT	A	USP1	frameshift_variant	HIGH	p.Asn662fs	NA
17D	6	21482946	AT	A	RBBP6	frameshift_variant	HIGH	p.Ile1222fs	NA
17D	6	38863524	G	A	PKD1	missense_variant	MODERATE	p.Val3975Met	NA
17D	7	41899062	A	G	RIT1	missense_variant	MODERATE	p.Arg120Gln	NA
17D	8	35263531	A	C	DHRS7	missense_variant	MODERATE	p.Val55Gly	NA
17D	8	59714186	A	C	PTPN21	missense_variant	MODERATE	p.Val892Leu	NA
17D	9	22227912	T	G	TOP2A	missense_variant	MODERATE	p.Asp1129Tyr	NA
17D	X	121535206	C	T	BCAP31	missense_variant	MODERATE	p.Val88Ile	NA
18B	12	935007	G	A	DLA-12	missense_variant	MODERATE	p.His221Arg	NA
18B	13	37711863	A	G	BOP1	missense_variant	MODERATE	p.Ala118Val	NA
18B	14	18644201	CT	CTT	SAMD9L	frameshift_variant	HIGH	p.Val1494fs	NA
18B	16	27074869	T	A	FGFR1	missense_variant	MODERATE	p.Met537Lys	oncogene / fusion
18B	17	22700915	T	TTTG,TTTTG	PPP1CB	frameshift_variant	HIGH	p.Leu337fs	NA
18B	17	33932902	G	C	EML4	missense_variant	MODERATE	p.Pro901Ala	fusion
18B	17	33932903	A	C	EML4	missense_variant	MODERATE	p.Pro901His	fusion
18B	18	17687864	CA	C	PTPN12	frameshift_variant	HIGH	p.Ile683fs	NA
18B	1	34696816	T	G	AIG1	missense_variant	MODERATE	p.Cys67Phe	NA
18B	1	102380869	A	C	BRSK1	missense_variant	MODERATE	p.Lys45Asn	NA
18B	1	107419672	T	C	FTL	missense_variant	MODERATE	p.Ala16Thr	NA
18B	1	113835321	A	C	SAMD4B	stop_gained	HIGH	p.Glu674*	NA
18B	20	57786051	A	G	CFD	missense_variant	MODERATE	p.Ala154Val	NA
18B	24	32606686	C	T	MATN4	splice_donor_variant&intron_variant	HIGH		NA
18B	25	14764971	G	A	MIPEP	missense_variant	MODERATE	p.Asn58Asp	NA
18B	27	19502416	T	C	CCDC91	missense_variant	MODERATE	p.Ala32Thr	NA
18B	28	9960840	C	CT	TM9SF3	frameshift_variant	HIGH	p.Ser70fs	NA
18B	2	76337809	T	C	KDM1A	missense_variant	MODERATE	p.Arg342His	NA
18B	30	11796739	T	C	C15orf48	missense_variant	MODERATE	p.Ala24Val	NA
18B	30	36092250	A	T	BBS4	missense_variant	MODERATE	p.Ser86Thr	NA
18B	34	19364386	A	G	RFC4	missense_variant	MODERATE	p.Pro139Ser	NA
18B	37	10013963	GA	G	BZW1	frameshift_variant	HIGH	p.Asn317fs	NA
18B	38	22228312	T	C	TAGLN2	missense_variant	MODERATE	p.Ala24Val	NA
18B	5	64621131	A	G	PIEZO1	missense_variant	MODERATE	p.Val382Met	NA
18B	6	40615097	A	G	ATP5F1	missense_variant	MODERATE	p.Arg208Cys	NA
18B	7	66487610	A	G	ESCO1	stop_gained	HIGH	p.Trp661*	NA
18B	9	15184452	T	C	PRKAR1A	missense_variant	MODERATE	p.Ala136Val	oncogene / TSG / fusion
18B	9	21158450	A	C	KRT17	missense_variant	MODERATE	p.Asn210Thr	NA
18B	MT	8159	T	C	MT-ATP6	stop_gained	HIGH	p.Arg66*	NA
18C	11	39037643	CTTA	C	FTH1	disruptive_inframe_deletion	MODERATE	p.Tyr41del	NA
18C	13	37711863	A	G	BOP1	missense_variant	MODERATE	p.Ala118Val	NA
18C	15	14104625	CT	C	LRRC41	frameshift_variant	HIGH	p.Ser134fs	NA
18C	17	22700915	T	TTTG,TTTTG	PPP1CB	frameshift_variant	HIGH	p.Leu337fs	NA
18C	17	33932902	G	C	EML4	missense_variant	MODERATE	p.Pro901Ala	fusion
18C	17	33932903	A	C	EML4	missense_variant	MODERATE	p.Pro901His	fusion
18C	1	102380869	A	C	BRSK1	missense_variant	MODERATE	p.Lys45Asn	NA
18C	1	107419672	T	C	FTL	missense_variant	MODERATE	p.Ala16Thr	NA
18C	20	57786051	A	G	CFD	missense_variant	MODERATE	p.Ala154Val	NA
18C	22	58520046	T	C	COL4A1	missense_variant	MODERATE	p.Ser1446Gly	NA
18C	25	14764971	G	A	MIPEP	missense_variant	MODERATE	p.Asn58Asp	NA
18C	2	37057930	A	T	NDFIP1	missense_variant	MODERATE	p.Val193Asp	NA
18C	2	60976577	T	TCTC	IRX5	conservative_inframe_deletion	MODERATE	p.Glu192del	NA
18C	2	76337809	T	C	KDM1A	missense_variant	MODERATE	p.Arg342His	NA
18C	30	11796739	T	C	C15orf48	missense_variant	MODERATE	p.Ala24Val	NA
18C	37	10013963	GA	G	BZW1	frameshift_variant	HIGH	p.Asn317fs	NA
18C	38	22228312	T	C	TAGLN2	missense_variant	MODERATE	p.Ala24Val	NA
18C	9	15184452	T	C	PRKAR1A	missense_variant	MODERATE	p.Ala136Val	oncogene / TSG / fusion
18C	9	47703255	G	GA	ATP2A3	frameshift_variant	HIGH	p.Arg838fs	NA
18C	MT	8159	T	C	MT-ATP6	stop_gained	HIGH	p.Arg66*	NA
18D	13	37711863	A	G	BOP1	missense_variant	MODERATE	p.Ala118Val	NA
18D	17	19828285	A	C	DTNB	missense_variant	MODERATE	p.Cys262Phe	NA
18D	17	33932902	G	C	EML4	missense_variant	MODERATE	p.Pro901Ala	fusion
18D	17	33932903	A	C	EML4	missense_variant	MODERATE	p.Pro901His	fusion
18D	1	102380869	A	C	BRSK1	missense_variant	MODERATE	p.Lys45Asn	NA
18D	1	107419672	T	C	FTL	missense_variant	MODERATE	p.Ala16Thr	NA
18D	20	57786051	A	G	CFD	missense_variant	MODERATE	p.Ala154Val	NA
18D	21	29918897	C	A	TAF10	missense_variant	MODERATE	p.Val96Gly	NA
18D	2	60976577	T	TCTC	IRX5	conservative_inframe_deletion	MODERATE	p.Glu192del	NA
18D	2	76337809	T	C	KDM1A	missense_variant	MODERATE	p.Arg342His	NA
18D	34	19364386	A	G	RFC4	missense_variant	MODERATE	p.Pro139Ser	NA
18D	38	22228312	T	C	TAGLN2	missense_variant	MODERATE	p.Ala24Val	NA
18D	3	13857973	A	G	RHOBTB3	missense_variant	MODERATE	p.His23Tyr	NA
18D	6	40615097	A	G	ATP5F1	missense_variant	MODERATE	p.Arg208Cys	NA
18D	7	41611722	A	C	SMG5	missense_variant	MODERATE	p.Glu426Ala	NA
18D	9	15184452	T	C	PRKAR1A	missense_variant	MODERATE	p.Ala136Val	oncogene / TSG / fusion
18D	9	21158450	A	C	KRT17	missense_variant	MODERATE	p.Asn210Thr	NA
18D	9	47703255	G	GA	ATP2A3	frameshift_variant	HIGH	p.Arg838fs	NA
18D	9	49786216	G	A	RPL7A	missense_variant	MODERATE	p.Arg249His	NA
18D	MT	8159	T	C	MT-ATP6	stop_gained	HIGH	p.Arg66*	NA
18E	12	62232628	G	A	HACE1	missense_variant	MODERATE	p.Pro886Ser	NA
18E	13	37711863	A	G	BOP1	missense_variant	MODERATE	p.Ala118Val	NA
18E	17	19828285	A	C	DTNB	missense_variant	MODERATE	p.Cys262Phe	NA
18E	17	22700915	T	TTTG,TTTTG	PPP1CB	frameshift_variant	HIGH	p.Leu337fs	NA
18E	17	33932902	G	C	EML4	missense_variant	MODERATE	p.Pro901Ala	fusion
18E	17	33932903	A	C	EML4	missense_variant	MODERATE	p.Pro901His	fusion
18E	18	17687864	CA	C	PTPN12	frameshift_variant	HIGH	p.Ile683fs	NA
18E	1	55529517	C	CGAG,CGAGGAG	AFDN	conservative_inframe_insertion	MODERATE	p.Glu1705dup	NA
18E	1	66051605	G	GT	ECHDC1	frameshift_variant	HIGH	p.Leu41fs	NA
18E	1	102380869	A	C	BRSK1	missense_variant	MODERATE	p.Lys45Asn	NA
18E	1	107419672	T	C	FTL	missense_variant	MODERATE	p.Ala16Thr	NA
18E	1	111982125	C	CATA	CXCL17	disruptive_inframe_deletion	MODERATE	p.His60_Lys61delinsGln	NA
18E	20	57786051	A	G	CFD	missense_variant	MODERATE	p.Ala154Val	NA
18E	22	58520046	T	C	COL4A1	missense_variant	MODERATE	p.Ser1446Gly	NA
18E	26	8439879	C	A	HVCN1	missense_variant	MODERATE	p.Val204Gly	NA
18E	27	11603529	GA	G	ZCRB1	frameshift_variant	HIGH	p.Lys141fs	NA
18E	28	9960840	C	CT	TM9SF3	frameshift_variant	HIGH	p.Ser70fs	NA
18E	28	25629217	G	C	FAM160B1	missense_variant	MODERATE	p.Glu711Asp	NA
18E	2	37057930	A	T	NDFIP1	missense_variant	MODERATE	p.Val193Asp	NA
18E	2	60976577	T	TCTC	IRX5	conservative_inframe_deletion	MODERATE	p.Glu192del	NA
18E	38	22228312	T	C	TAGLN2	missense_variant	MODERATE	p.Ala24Val	NA
18E	6	40615097	A	G	ATP5F1	missense_variant	MODERATE	p.Arg208Cys	NA
18E	7	41611722	A	C	SMG5	missense_variant	MODERATE	p.Glu426Ala	NA
18E	7	66487610	A	G	ESCO1	stop_gained	HIGH	p.Trp661*	NA
18E	9	5175715	GT	G	GRB2	frameshift_variant	HIGH	p.Gly63fs	NA
18E	9	21158450	A	C	KRT17	missense_variant	MODERATE	p.Asn210Thr	NA
18E	9	49786216	G	A	RPL7A	missense_variant	MODERATE	p.Arg249His	NA
18E	X	77086396	G	GT	MORF4L2	frameshift_variant	HIGH	p.Pro24fs	NA
18E	MT	8159	T	C	MT-ATP6	stop_gained	HIGH	p.Arg66*	NA
18E	MT	9535	G	A	MT-ND3	missense_variant	MODERATE	p.Ala14Thr	NA
18F	15	4913014	T	C	GNL2	missense_variant	MODERATE	p.Leu478Ser	NA
18F	17	13167442	AT	A	SMC6	frameshift_variant	HIGH	p.Ile416fs	NA
18F	18	17687864	CA	C	PTPN12	frameshift_variant	HIGH	p.Ile683fs	NA
18F	1	66051605	G	GT	ECHDC1	frameshift_variant	HIGH	p.Leu41fs	NA
18F	1	102380869	A	C	BRSK1	missense_variant	MODERATE	p.Lys45Asn	NA
18F	1	107419672	T	C	FTL	missense_variant	MODERATE	p.Ala16Thr	NA
18F	20	49185222	A	C	NFIX	missense_variant	MODERATE	p.Val139Gly	NA
18F	20	55470012	T	G	MAP2K2	missense_variant	MODERATE	p.Val85Gly	oncogene
18F	21	22507196	T	C	UVRAG	missense_variant	MODERATE	p.Ser689Asn	NA
18F	25	37752452	A	AT	CUL3	frameshift_variant	HIGH	p.Asn435fs	NA
18F	28	9960840	C	CT	TM9SF3	frameshift_variant	HIGH	p.Ser70fs	NA
18F	2	37057930	A	T	NDFIP1	missense_variant	MODERATE	p.Val193Asp	NA
18F	2	53520374	A	C	PIK3R1	missense_variant	MODERATE	p.Lys380Asn	TSG
18F	38	22228312	T	C	TAGLN2	missense_variant	MODERATE	p.Ala24Val	NA
18F	3	13857973	A	G	RHOBTB3	missense_variant	MODERATE	p.His23Tyr	NA
18F	4	23945047	A	AT	ANXA7	frameshift_variant	HIGH	p.Ile223fs	NA
18F	5	4718705	G	A	APLP2	missense_variant	MODERATE	p.Arg494Trp	NA
18F	6	40615097	A	G	ATP5F1	missense_variant	MODERATE	p.Arg208Cys	NA
18F	MT	8159	T	C	MT-ATP6	stop_gained	HIGH	p.Arg66*	NA
18F	MT	11986	C	T	ND5	missense_variant	MODERATE	p.Thr70Ile	NA
18G	12	1329530	G	GA	SLC44A4	frameshift_variant	HIGH	p.Phe616fs	NA
18G	13	37711863	A	G	BOP1	missense_variant	MODERATE	p.Ala118Val	NA
18G	15	14104625	CT	C	LRRC41	frameshift_variant	HIGH	p.Ser134fs	NA
18G	15	29611666	G	T	KITLG	missense_variant	MODERATE	p.Leu84Ile	NA
18G	17	19828285	A	C	DTNB	missense_variant	MODERATE	p.Cys262Phe	NA
18G	17	33932902	G	C	EML4	missense_variant	MODERATE	p.Pro901Ala	fusion
18G	17	33932903	A	C	EML4	missense_variant	MODERATE	p.Pro901His	fusion
18G	18	54108994	G	A	AHNAK	missense_variant	MODERATE	p.Val3491Met	NA
18G	1	34696816	T	G	AIG1	missense_variant	MODERATE	p.Cys67Phe	NA
18G	1	66051605	G	GT	ECHDC1	frameshift_variant	HIGH	p.Leu41fs	NA
18G	1	102380869	A	C	BRSK1	missense_variant	MODERATE	p.Lys45Asn	NA
18G	1	107419672	T	C	FTL	missense_variant	MODERATE	p.Ala16Thr	NA
18G	21	22507196	T	C	UVRAG	missense_variant	MODERATE	p.Ser689Asn	NA
18G	22	58520046	T	C	COL4A1	missense_variant	MODERATE	p.Ser1446Gly	NA
18G	25	14764971	G	A	MIPEP	missense_variant	MODERATE	p.Asn58Asp	NA
18G	2	37057930	A	T	NDFIP1	missense_variant	MODERATE	p.Val193Asp	NA
18G	2	76337809	T	C	KDM1A	missense_variant	MODERATE	p.Arg342His	NA
18G	30	11796739	T	C	C15orf48	missense_variant	MODERATE	p.Ala24Val	NA
18G	34	7171814	G	A	NSUN2	missense_variant	MODERATE	p.Cys675Tyr	NA
18G	34	19364386	A	G	RFC4	missense_variant	MODERATE	p.Pro139Ser	NA
18G	37	10013963	GA	G	BZW1	frameshift_variant	HIGH	p.Asn317fs	NA
18G	38	22228312	T	C	TAGLN2	missense_variant	MODERATE	p.Ala24Val	NA
18G	3	13857973	A	G	RHOBTB3	missense_variant	MODERATE	p.His23Tyr	NA
18G	5	21045191	GT	G	NKAPD1	frameshift_variant	HIGH	p.Gln170fs	NA
18G	6	40615097	A	G	ATP5F1	missense_variant	MODERATE	p.Arg208Cys	NA
18G	7	66487610	A	G	ESCO1	stop_gained	HIGH	p.Trp661*	NA
18G	9	2673089	C	CA	CYTH1	frameshift_variant&splice_region_variant	HIGH	p.Pro323fs	NA
18G	9	15184452	T	C	PRKAR1A	missense_variant	MODERATE	p.Ala136Val	oncogene / TSG / fusion
18G	MT	8159	T	C	MT-ATP6	stop_gained	HIGH	p.Arg66*	NA
1C	11	64044895	A	C	ELP1	missense_variant	MODERATE	p.Glu1201Asp	NA
1C	11	74260474	T	C	GSN	missense_variant	MODERATE	p.Arg395Trp	NA
1C	12	983861	T	A	DLA-64	missense_variant	MODERATE	p.Phe31Tyr	NA
1C	12	2157116	C	A	HLA-DRB1	missense_variant	MODERATE	p.Ile127Ser	NA
1C	12	2157117	C	T	HLA-DRB1	missense_variant	MODERATE	p.Ile127Val	NA
1C	13	58026931	G	A	CENPC	missense_variant	MODERATE	p.Arg754Trp	NA
1C	13	60069684	A	G	RUFY3	splice_acceptor_variant&intron_variant	HIGH		NA
1C	15	17735656	C	CCAG	TEP1	conservative_inframe_deletion	MODERATE	p.Leu685del	NA
1C	18	54111403	A	G	AHNAK	missense_variant	MODERATE	p.Val4294Ile	NA
1C	1	107419672	T	C	FTL	missense_variant	MODERATE	p.Ala16Thr	NA
1C	1	117419893	T	G	FXYD5	missense_variant	MODERATE	p.Ala93Glu	NA
1C	1	119459276	ACAGT	A	DPY19L3	frameshift_variant	HIGH	p.Asp719fs	NA
1C	20	8792451	G	GT	THUMPD3	frameshift_variant	HIGH	p.Thr145fs	NA
1C	20	53780243	AGCCTG	A	GTF2F1	frameshift_variant	HIGH	p.Ser570fs	NA
1C	20	58090567	G	C	PLPP2	missense_variant	MODERATE	p.Ala39Gly	NA
1C	22	5200026	G	GA	ZC3H13	frameshift_variant	HIGH	p.Ala959fs	NA
1C	23	10560310	C	T	CTNNB1	missense_variant	MODERATE	p.Ser37Phe	oncogene / fusion
1C	26	6016054	C	T	EIF2B1	missense_variant	MODERATE	p.Ala143Val	NA
1C	26	10644789	A	T	TPCN1	missense_variant	MODERATE	p.Tyr347Phe	NA
1C	30	11335597	A	G	B2M	missense_variant	MODERATE	p.Arg107His	TSG
1C	33	31341662	C	T	LRRC15	missense_variant	MODERATE	p.Leu412Pro	NA
1C	5	32209155	C	CT	GABARAP	frameshift_variant	HIGH	p.Tyr49fs	NA
1C	6	62950468	T	C	MCOLN3	missense_variant	MODERATE	p.Leu451Pro	NA
1C	7	19459119	C	A	C1orf27	missense_variant	MODERATE	p.Ser242Tyr	NA
1C	7	74575772	G	T	PTPRM	missense_variant	MODERATE	p.Trp1262Leu	NA
1C	8	4107261	CT	C	PCK2	frameshift_variant	HIGH	p.Gly581fs	NA
1C	9	3059857	C	CT	TNRC6C	frameshift_variant	HIGH	p.Gly1130fs	NA
1C	9	20596296	G	T	STAT3	missense_variant	MODERATE	p.Gln276His	oncogene
1C	9	48778781	T	C	TMEM141	splice_donor_variant&intron_variant	HIGH		NA
1C	9	49497319	T	C	CAMSAP1	missense_variant	MODERATE	p.Arg220Cys	NA
1C	X	101300260	G	A	AIFM1	stop_gained	HIGH	p.Arg41*	NA
1E	10	22775219	C	T	A4GALT	missense_variant	MODERATE	p.Phe129Ser	NA
1E	11	39037907	AC	A	FTH1	frameshift_variant	HIGH	p.His129fs	NA
1E	11	74260474	T	C	GSN	missense_variant	MODERATE	p.Arg395Trp	NA
1E	12	983861	T	A	DLA-64	missense_variant	MODERATE	p.Phe31Tyr	NA
1E	17	37551127	C	G	IGKV2D-26	missense_variant	MODERATE	p.Leu38Val	NA
1E	17	37551218	C	G	IGKV2D-26	missense_variant	MODERATE	p.Thr68Ser	NA
1E	17	60889855	AT	A	THEM4	frameshift_variant	HIGH	p.Asn331fs	NA
1E	17	60889855	AT	A	THEM4	frameshift_variant	HIGH	p.Asn236fs	NA
1E	1	107419672	T	C	FTL	missense_variant	MODERATE	p.Ala16Thr	NA
1E	20	52315821	G	A	ZNF358	missense_variant	MODERATE	p.Gly576Asp	NA
1E	20	52621614	T	C	TIMM44	missense_variant	MODERATE	p.Lys146Glu	NA
1E	23	1868100	T	A	ZNF852	missense_variant	MODERATE	p.Ile430Asn	NA
1E	23	1868112	C	T	ZNF852	missense_variant	MODERATE	p.Ala434Val	NA
1E	26	10644789	A	T	TPCN1	missense_variant	MODERATE	p.Tyr347Phe	NA
1E	26	23526210	A	C	RNF215	missense_variant	MODERATE	p.Ala355Ser	NA
1E	26	24102607	C	G	SMTN	missense_variant	MODERATE	p.Ala789Pro	NA
1E	33	27797746	G	A	ITGB5	missense_variant	MODERATE	p.Pro779Ser	NA
1E	37	16605846	T	G	PIKFYVE	missense_variant	MODERATE	p.Val1664Phe	NA
1E	38	6202374	T	C	RGS2	missense_variant	MODERATE	p.Asp41Asn	NA
1E	6	28145179	T	C	MYH11	missense_variant	MODERATE	p.Ala1491Val	fusion
1E	6	39313450	G	A	TELO2	missense_variant	MODERATE	p.His621Tyr	NA
1E	7	29409438	A	G	NME7	missense_variant	MODERATE	p.Arg334Gln	NA
1E	9	48778781	T	C	TMEM141	splice_donor_variant&intron_variant	HIGH		NA
1E	X	104950507	CT	C	CCDC160	frameshift_variant&stop_gained	HIGH	p.Ser59fs	NA
1E	X	122079384	G	A	FLNA	missense_variant	MODERATE	p.Asn2161Asp	NA
1E	JH373278.1	358374	C	CT	DDX56	frameshift_variant	HIGH	p.Leu95fs	NA
1F	10	41799059	G	T	TBC1D8	missense_variant	MODERATE	p.Asp323Tyr	NA
1F	11	64044895	A	C	ELP1	missense_variant	MODERATE	p.Glu1201Asp	NA
1F	11	74260474	T	C	GSN	missense_variant	MODERATE	p.Arg395Trp	NA
1F	12	2249086	C	T	DLA-DQB1	missense_variant	MODERATE	p.Ala60Thr	NA
1F	12	2728168	A	G	WDR46	missense_variant	MODERATE	p.Cys173Arg	NA
1F	12	10737567	G	T	C6orf132	missense_variant	MODERATE	p.Thr268Pro	NA
1F	12	64512184	A	G	PDSS2	missense_variant	MODERATE	p.Met137Thr	NA
1F	12	72015792	T	C	ERMARD	missense_variant	MODERATE	p.Ser405Leu	NA
1F	14	36005457	A	AT	RAPGEF5	frameshift_variant	HIGH	p.Phe723fs	NA
1F	16	6297491	G	A	EPHA1	missense_variant	MODERATE	p.Gly476Glu	NA
1F	16	44209737	A	G	FAT1	missense_variant	MODERATE	p.Val1615Ile	TSG
1F	16	45035960	C	A	SORBS2	missense_variant	MODERATE	p.Met1043Leu	NA
1F	17	37551272	G	A	IGKV2D-26	missense_variant	MODERATE	p.Arg86Lys	NA
1F	18	1788882	C	A	FIGNL1	missense_variant	MODERATE	p.Phe650Leu	NA
1F	18	12018601	AGC	A	SFRP4	frameshift_variant	HIGH	p.Asp107fs	TSG
1F	18	16848293	C	CT	PSMC2	frameshift_variant	HIGH	p.Ala269fs	NA
1F	18	33211906	C	G	EHF	missense_variant&splice_region_variant	MODERATE	p.Ser32Thr	NA
1F	18	38827954	A	AGTC	TNKS1BP1	disruptive_inframe_deletion	MODERATE	p.Arg897del	NA
1F	18	45198836	T	C	CD151	missense_variant	MODERATE	p.Arg195Trp	NA
1F	18	49085801	A	G	IGHMBP2	stop_gained	HIGH	p.Gln108*	NA
1F	18	53810692	C	T	SLC3A2	missense_variant	MODERATE	p.Thr490Ala	NA
1F	18	54105454	T	A	AHNAK	missense_variant	MODERATE	p.Ile2311Phe	NA
1F	18	54987464	T	G	CPSF7	missense_variant	MODERATE	p.Leu25Arg	NA
1F	19	22735222	T	A	AMMECR1L	missense_variant	MODERATE	p.Val103Glu	NA
1F	1	55529517	C	CGAG,CGAGGAG	AFDN	conservative_inframe_insertion	MODERATE	p.Glu1705dup	NA
1F	1	107419672	T	C	FTL	missense_variant	MODERATE	p.Ala16Thr	NA
1F	1	110437222	G	C	RELB	missense_variant	MODERATE	p.Pro540Arg	NA
1F	1	119459276	ACAGT	A	DPY19L3	frameshift_variant	HIGH	p.Asp719fs	NA
1F	20	4314241	C	A	XPC	missense_variant	MODERATE	p.Ser257Ala	TSG
1F	20	22653825	T	G	ARL6IP5	missense_variant	MODERATE	p.Asp14Glu	NA
1F	20	33716981	T	A	CCDC66	missense_variant	MODERATE	p.Leu762Gln	NA
1F	20	39463308	G	A	UBA7	missense_variant	MODERATE	p.Ser427Asn	NA
1F	20	39576102	A	G	RNF123	missense_variant	MODERATE	p.Ser92Phe	NA
1F	20	39956590	T	C	C3orf62	missense_variant	MODERATE	p.Ala251Val	NA
1F	20	50128370	C	T	LDLR	missense_variant	MODERATE	p.Lys515Arg	NA
1F	20	55316410	G	T	MPND	missense_variant	MODERATE	p.Thr224Pro	NA
1F	20	55864005	A	G	C19orf71	missense_variant	MODERATE	p.Arg139Trp	NA
1F	20	57849578	A	G	PALM	missense_variant	MODERATE	p.Pro216Leu	NA
1F	20	58090567	G	C	PLPP2	missense_variant	MODERATE	p.Ala39Gly	NA
1F	21	31290488	C	G	PPFIBP2	missense_variant	MODERATE	p.Glu389Gln	NA
1F	22	152034	T	C	ALG11	missense_variant	MODERATE	p.Val603Ile	NA
1F	22	3421338	T	C	NUDT15	missense_variant	MODERATE	p.Asn106Asp	NA
1F	22	9147928	T	C	VWA8	missense_variant	MODERATE	p.Arg1878Cys	NA
1F	22	58907600	T	C	CARS2	missense_variant	MODERATE	p.Ala282Thr	NA
1F	22	60406877	A	G	ATP11A	missense_variant	MODERATE	p.Val726Ile	NA
1F	24	32606686	C	T	MATN4	splice_donor_variant&intron_variant	HIGH		NA
1F	26	10644789	A	T	TPCN1	missense_variant	MODERATE	p.Tyr347Phe	NA
1F	28	24657116	T	C	PLEKHS1	missense_variant	MODERATE	p.His218Tyr	NA
1F	28	24659419	C	G	PLEKHS1	missense_variant	MODERATE	p.Cys303Ser	NA
1F	2	30102233	A	G	ANKRD16	missense_variant	MODERATE	p.Val211Ile	NA
1F	2	30694778	C	T	AKR1E2	missense_variant	MODERATE	p.Ser302Asn	NA
1F	2	58806941	A	G	ADGRG1	stop_gained	HIGH	p.Gln673*	NA
1F	2	68856787	C	T	BSDC1	missense_variant	MODERATE	p.Thr138Ile	NA
1F	2	71490861	A	G	EPB41	missense_variant	MODERATE	p.Ser79Leu	NA
1F	2	74549512	G	GA	RSRP1	frameshift_variant	HIGH	p.Ile300fs	NA
1F	30	11335597	A	G	B2M	missense_variant	MODERATE	p.Arg107His	TSG
1F	30	36092250	A	T	BBS4	missense_variant	MODERATE	p.Ser86Thr	NA
1F	32	32267133	A	AATG	ALPK1	disruptive_inframe_deletion	MODERATE	p.Asp1196del	NA
1F	33	25803790	T	C	HSPBAP1	missense_variant	MODERATE	p.Asp433Asn	NA
1F	33	29050018	C	G	MUC20	missense_variant	MODERATE	p.Ser92Thr	NA
1F	33	29050419	C	T	MUC20	missense_variant	MODERATE	p.Tyr226His	NA
1F	33	30422678	C	T	BDH1	missense_variant	MODERATE	p.Ala45Thr	NA
1F	33	30422723	G	GGCTC	BDH1	frameshift_variant	HIGH	p.His30fs	NA
1F	33	30422724	GCTCA	G	BDH1	frameshift_variant&splice_region_variant	HIGH	p.His30fs	NA
1F	36	12881363	C	T	STK39	missense_variant&splice_region_variant	MODERATE	p.Ala499Thr	NA
1F	36	14609697	G	A	UBR3	missense_variant	MODERATE	p.Arg800His	NA
1F	37	16605846	T	G	PIKFYVE	missense_variant	MODERATE	p.Val1664Phe	NA
1F	37	25265970	T	C	BCS1L	missense_variant	MODERATE	p.Arg306Cys	NA
1F	37	29705991	A	C	SERPINE2	missense_variant	MODERATE	p.Ala310Ser	NA
1F	37	29715243	C	T	SERPINE2	missense_variant	MODERATE	p.Asp211Asn	NA
1F	3	62316649	A	G	FGFR3	missense_variant	MODERATE	p.Arg153Trp	oncogene / fusion
1F	3	64343049	G	A	PROM1	missense_variant	MODERATE	p.Asp539Asn	NA
1F	3	87375696	A	T	ADGRA3	stop_gained	HIGH	p.Lys132*	NA
1F	4	52774824	G	A	CYFIP2	missense_variant	MODERATE	p.Ala1216Val	NA
1F	4	54986561	A	G	FAXDC2	missense_variant	MODERATE	p.Asn159Asp	NA
1F	5	32209155	C	CT	GABARAP	frameshift_variant	HIGH	p.Tyr49fs	NA
1F	5	41683330	A	G	SREBF1	missense_variant	MODERATE	p.Asn827Ser	NA
1F	5	47815298	C	A	KANK4	missense_variant	MODERATE	p.Asn434His	NA
1F	5	56259484	G	C	AGRN	missense_variant	MODERATE	p.Glu283Asp	NA
1F	5	56267831	G	A	AGRN	missense_variant	MODERATE	p.Arg1530His	NA
1F	6	7227369	G	A	RHBDD2	missense_variant	MODERATE	p.Arg251Gly	NA
1F	6	7714727	A	G	LRWD1	missense_variant	MODERATE	p.Ala274Val	NA
1F	6	7716445	T	G	LRWD1	missense_variant	MODERATE	p.Leu51Met	NA
1F	6	10056411	C	T	ZNF789	missense_variant	MODERATE	p.Tyr110Cys	NA
1F	6	15136704	C	T	MAD1L1	missense_variant	MODERATE	p.Thr521Met	NA
1F	6	16097087	T	C	DNAAF5	missense_variant	MODERATE	p.Ala448Thr	NA
1F	6	18956479	G	A	KIAA0556	missense_variant	MODERATE	p.Pro579Leu	NA
1F	6	28467141	G	A	NTAN1	missense_variant&splice_region_variant	MODERATE	p.Ala184Val	NA
1F	6	30985853	G	A	RSL1D1	missense_variant	MODERATE	p.Asp89Gly	NA
1F	7	963219	T	C	ELF3	missense_variant	MODERATE	p.Thr34Ala	NA
1F	7	16506359	G	T	LAMC1	missense_variant	MODERATE	p.Val916Gly	NA
1F	7	29409516	C	T	NME7	missense_variant	MODERATE	p.Pro360Leu	NA
1F	7	41588643	G	C	GLMP	missense_variant	MODERATE	p.Cys49Trp	NA
1F	7	45390392	C	T	SLC14A1	missense_variant	MODERATE	p.Met199Val	NA
1F	8	63477529	T	C	SERPINA9	missense_variant	MODERATE	p.Gly278Asp	NA
1F	8	63483625	T	G	SERPINA9	missense_variant	MODERATE	p.Thr199Lys	NA
1F	8	71109802	G	GACA	EIF5	disruptive_inframe_deletion	MODERATE	p.Asn420del	NA
1F	8	72397614	T	C	CEP170B	missense_variant	MODERATE	p.Arg1511Cys	NA
1F	8	72459404	A	G	CDCA4	missense_variant	MODERATE	p.Ala216Val	NA
1F	9	49010179	CTGGTGG	C	NOTCH1	conservative_inframe_deletion	MODERATE	p.Val1572_Val1573del	oncogene / TSG / fusion
1F	9	49010207	T	C	NOTCH1	missense_variant	MODERATE	p.Leu1580Pro	oncogene / TSG / fusion
1F	9	49497319	T	C	CAMSAP1	missense_variant	MODERATE	p.Arg220Cys	NA
1F	X	118989202	A	G	MTMR1	missense_variant	MODERATE	p.Gln538Arg	NA
1F	X	122079056	T	G	FLNA	missense_variant	MODERATE	p.Val2090Gly	NA
1F	MT	4415	G	A	MT-ND2	missense_variant	MODERATE	p.Gly168Ser	NA
1F	JH373368.1	51919	G	A	HENMT1	missense_variant	MODERATE	p.Asp203Asn	NA
2A	10	19826393	T	C	CELSR1	missense_variant	MODERATE	p.Ala2276Val	NA
2A	10	23752843	A	G	ACO2	missense_variant	MODERATE	p.Thr235Met	NA
2A	10	38043581	A	G	FHL2	missense_variant	MODERATE	p.Ala30Thr	NA
2A	12	934331	A	G	DLA-12	missense_variant	MODERATE	p.Arg193Gln	NA
2A	12	2157194	T	G	HLA-DRB1	missense_variant	MODERATE	p.Ser101Tyr	NA
2A	12	2157203	T	A	HLA-DRB1	missense_variant	MODERATE	p.Asp98Val	NA
2A	12	11290733	A	G	UBR2	missense_variant	MODERATE	p.Cys1659Tyr	NA
2A	13	37456111	T	C	PLEC	missense_variant	MODERATE	p.Ala2817Thr	NA
2A	13	38456133	C	CTCG	WFS1	disruptive_inframe_deletion	MODERATE	p.Asp266del	NA
2A	15	31797442	T	C	LUM	stop_gained	HIGH	p.Trp94*	NA
2A	17	51537885	GA	G	PHTF1	frameshift_variant	HIGH	p.Phe546fs	NA
2A	17	54359902	T	C	PTGFRN	stop_gained	HIGH	p.Arg473*	NA
2A	17	57301688	G	A	PDE4DIP	missense_variant	MODERATE	p.Val1027Met	fusion
2A	18	54111403	A	G	AHNAK	missense_variant	MODERATE	p.Val4294Ile	NA
2A	1	110437222	C	G	RELB	missense_variant	MODERATE	p.Pro540Arg	NA
2A	20	5603239	T	C	PLXND1	missense_variant	MODERATE	p.Arg1576Trp	NA
2A	20	37299598	A	G	NISCH	missense_variant	MODERATE	p.Ala128Val	NA
2A	20	46974174	T	C	NOTCH3	missense_variant	MODERATE	p.Thr1786Ile	NA
2A	20	52886750	T	C	CD320	missense_variant	MODERATE	p.Asp179Asn	NA
2A	21	25918452	T	C	FOLR2	missense_variant	MODERATE	p.His82Arg	NA
2A	23	7191724	CA	C	GOLGA4	frameshift_variant	HIGH	p.Ile1666fs	NA
2A	23	12399093	G	A	CMTM8	missense_variant	MODERATE	p.Phe164Ser	NA
2A	23	51982294	TA	T	GFM1	frameshift_variant	HIGH	p.Gly747fs	NA
2A	24	9350050	A	G	ISM1	missense_variant	MODERATE	p.Ala67Val	NA
2A	24	24507665	A	G	ERGIC3	missense_variant	MODERATE	p.Ser352Gly	NA
2A	26	6121418	G	A	SNRNP35	missense_variant	MODERATE	p.Leu14Phe	NA
2A	26	31210171	A	T	TOP3B	missense_variant	MODERATE	p.Cys161Ser	NA
2A	27	17600357	T	G	IPO8	stop_gained	HIGH	p.Glu385*	NA
2A	30	11335597	G	A	B2M	missense_variant	MODERATE	p.Arg107His	TSG
2A	3	17692132	T	C	ARRDC3	missense_variant	MODERATE	p.Arg58Cys	NA
2A	3	61084769	A	G	HTT	missense_variant	MODERATE	p.Ala2906Val	NA
2A	3	69588238	T	A	SLC2A9	missense_variant	MODERATE	p.Lys494Ile	NA
2A	5	31679049	T	G	SLC25A11	missense_variant	MODERATE	p.Ala197Ser	NA
2A	5	76143116	C	T	GLG1	missense_variant	MODERATE	p.Trp564Arg	NA
2A	6	9109271	T	G	LRCH4	missense_variant	MODERATE	p.Ser237Ala	NA
2A	7	40185	A	G	MYBPH	missense_variant	MODERATE	p.Arg188His	NA
2A	7	43502400	T	C	S100A6	missense_variant	MODERATE	p.Ala2Val	NA
2A	7	69866953	T	C	MYL12A	missense_variant	MODERATE	p.Arg14Cys	NA
2A	9	430576	T	C	P4HB	missense_variant	MODERATE	p.Ala177Val	NA
2A	9	1443797	T	C	RNF213	missense_variant	MODERATE	p.Gly4280Glu	fusion
2A	9	31720864	C	T	TRIM25	missense_variant	MODERATE	p.Lys198Glu	NA
2A	9	47703255	GA	G	ATP2A3	frameshift_variant	HIGH	p.Arg838fs	NA
2A	9	58144993	A	G	ARPC5L	missense_variant	MODERATE	p.Arg55Trp	NA
2A	X	122079384	G	A	FLNA	missense_variant	MODERATE	p.Asn2161Asp	NA
2A	MT	5573	TG	T	MT-CO1	frameshift_variant	HIGH	p.Gly77fs	NA
2A	MT	6739	C	T	MT-CO1	missense_variant	MODERATE	p.Ala464Val	NA
2A	MT	9154	G	A	COX3	missense_variant	MODERATE	p.Val171Ile	NA
2B	10	16832578	A	G	SBF1	missense_variant	MODERATE	p.Ala300Thr	NA
2B	10	23752843	A	G	ACO2	missense_variant	MODERATE	p.Thr235Met	NA
2B	10	28106803	A	AGAG	MYH9	conservative_inframe_deletion	MODERATE	p.Glu929del	TSG / fusion
2B	10	38043581	A	G	FHL2	missense_variant	MODERATE	p.Ala30Thr	NA
2B	11	26626091	T	C	SIL1	stop_gained	HIGH	p.Trp104*	NA
2B	12	934331	A	G	DLA-12	missense_variant	MODERATE	p.Arg193Gln	NA
2B	12	11290733	A	G	UBR2	missense_variant	MODERATE	p.Cys1659Tyr	NA
2B	15	31797442	T	C	LUM	stop_gained	HIGH	p.Trp94*	NA
2B	17	20181896	T	A	RAB10	missense_variant	MODERATE	p.Leu14Gln	NA
2B	17	53843909	T	A	ATP1A1	missense_variant	MODERATE	p.Leu966Gln	oncogene / TSG
2B	17	54359902	T	C	PTGFRN	stop_gained	HIGH	p.Arg473*	NA
2B	18	49085733	C	CTCCCGG	IGHMBP2	disruptive_inframe_deletion	MODERATE	p.Asp128_Arg129del	NA
2B	1	14028761	G	A	PHLPP1	missense_variant	MODERATE	p.Pro1379Ser	NA
2B	20	46974174	T	C	NOTCH3	missense_variant	MODERATE	p.Thr1786Ile	NA
2B	20	52886750	T	C	CD320	missense_variant	MODERATE	p.Asp179Asn	NA
2B	23	12399093	G	A	CMTM8	missense_variant	MODERATE	p.Phe164Ser	NA
2B	23	51982294	TA	T	GFM1	frameshift_variant	HIGH	p.Gly747fs	NA
2B	2	69010668	C	T	TXLNA	splice_donor_variant&intron_variant	HIGH		NA
2B	2	69235821	C	T	PTP4A2	stop_gained	HIGH	p.Arg154*	NA
2B	3	61084769	A	G	HTT	missense_variant	MODERATE	p.Ala2906Val	NA
2B	3	69588238	T	A	SLC2A9	missense_variant	MODERATE	p.Lys494Ile	NA
2B	5	31679049	T	G	SLC25A11	missense_variant	MODERATE	p.Ala197Ser	NA
2B	7	40185	A	G	MYBPH	missense_variant	MODERATE	p.Arg188His	NA
2B	7	29409438	G	A	NME7	missense_variant	MODERATE	p.Arg334Gln	NA
2B	7	43502400	T	C	S100A6	missense_variant	MODERATE	p.Ala2Val	NA
2B	7	69866953	T	C	MYL12A	missense_variant	MODERATE	p.Arg14Cys	NA
2B	9	430576	T	C	P4HB	missense_variant	MODERATE	p.Ala177Val	NA
2B	9	1443797	T	C	RNF213	missense_variant	MODERATE	p.Gly4280Glu	fusion
2B	9	3059857	CT	C	TNRC6C	frameshift_variant	HIGH	p.Gly1130fs	NA
2B	9	31720864	C	T	TRIM25	missense_variant	MODERATE	p.Lys198Glu	NA
2B	9	47703255	GA	G	ATP2A3	frameshift_variant	HIGH	p.Arg838fs	NA
2B	9	58144993	A	G	ARPC5L	missense_variant	MODERATE	p.Arg55Trp	NA
2B	X	106864860	AGAG	A	HTATSF1	conservative_inframe_insertion	MODERATE	p.Glu551dup	NA
2B	X	122079384	G	A	FLNA	missense_variant	MODERATE	p.Asn2161Asp	NA
2D	10	38043581	A	G	FHL2	missense_variant	MODERATE	p.Ala30Thr	NA
2D	12	934331	A	G	DLA-12	missense_variant	MODERATE	p.Arg193Gln	NA
2D	12	11290733	A	G	UBR2	missense_variant	MODERATE	p.Cys1659Tyr	NA
2D	15	31797442	T	C	LUM	stop_gained	HIGH	p.Trp94*	NA
2D	17	51537885	GA	GAA	PHTF1	frameshift_variant	HIGH	p.Met547fs	NA
2D	17	54359902	T	C	PTGFRN	stop_gained	HIGH	p.Arg473*	NA
2D	18	49088688	A	T	IGHMBP2	missense_variant	MODERATE	p.Val39Glu	NA
2D	20	5603239	T	C	PLXND1	missense_variant	MODERATE	p.Arg1576Trp	NA
2D	20	52886750	T	C	CD320	missense_variant	MODERATE	p.Asp179Asn	NA
2D	23	7191724	CA	C	GOLGA4	frameshift_variant	HIGH	p.Ile1666fs	NA
2D	23	51982294	TA	T	GFM1	frameshift_variant	HIGH	p.Gly747fs	NA
2D	24	9350050	A	G	ISM1	missense_variant	MODERATE	p.Ala67Val	NA
2D	25	7857822	T	C	FRY	missense_variant	MODERATE	p.Arg2809Lys	NA
2D	27	17600357	T	G	IPO8	stop_gained	HIGH	p.Glu385*	NA
2D	30	11335597	G	A	B2M	missense_variant	MODERATE	p.Arg107His	TSG
2D	35	18722781	C	CT	MBOAT1	frameshift_variant	HIGH	p.Asp575fs	NA
2D	37	28901725	C	CA	ACSL3	frameshift_variant	HIGH	p.Asn97fs	fusion
2D	3	17692132	T	C	ARRDC3	missense_variant	MODERATE	p.Arg58Cys	NA
2D	3	61084769	A	G	HTT	missense_variant	MODERATE	p.Ala2906Val	NA
2D	5	31679049	T	G	SLC25A11	missense_variant	MODERATE	p.Ala197Ser	NA
2D	5	76143116	C	T	GLG1	missense_variant	MODERATE	p.Trp564Arg	NA
2D	7	43502400	T	C	S100A6	missense_variant	MODERATE	p.Ala2Val	NA
2D	9	430576	T	C	P4HB	missense_variant	MODERATE	p.Ala177Val	NA
2D	9	1443797	T	C	RNF213	missense_variant	MODERATE	p.Gly4280Glu	fusion
2D	9	47703255	GA	G	ATP2A3	frameshift_variant	HIGH	p.Arg838fs	NA
2D	MT	14786	G	A	MT-CYB	missense_variant	MODERATE	p.Glu202Lys	NA
2F	10	16832578	A	G	SBF1	missense_variant	MODERATE	p.Ala300Thr	NA
2F	10	23752843	A	G	ACO2	missense_variant	MODERATE	p.Thr235Met	NA
2F	10	38043581	A	G	FHL2	missense_variant	MODERATE	p.Ala30Thr	NA
2F	12	934331	A	G	DLA-12	missense_variant	MODERATE	p.Arg193Gln	NA
2F	12	11290733	A	G	UBR2	missense_variant	MODERATE	p.Cys1659Tyr	NA
2F	13	37456111	T	C	PLEC	missense_variant	MODERATE	p.Ala2817Thr	NA
2F	13	38456133	C	CTCG	WFS1	disruptive_inframe_deletion	MODERATE	p.Asp266del	NA
2F	15	6660245	T	C	KIAA0319L	missense_variant	MODERATE	p.Thr656Met	NA
2F	15	16609356	G	T	PTPRF	missense_variant	MODERATE	p.Ser993Arg	NA
2F	15	16609594	G	A	PTPRF	missense_variant	MODERATE	p.Ala914Val	NA
2F	15	16730070	C	T	SZT2	missense_variant	MODERATE	p.Val3374Met	NA
2F	15	19737309	G	C	CSRP2	missense_variant	MODERATE	p.Arg22Pro	NA
2F	15	31797442	T	C	LUM	stop_gained	HIGH	p.Trp94*	NA
2F	15	49104541	G	A	SH3D19	missense_variant	MODERATE	p.Thr312Ile	NA
2F	16	6297491	G	A	EPHA1	missense_variant	MODERATE	p.Gly476Glu	NA
2F	16	6340455	T	G	FAM131B	missense_variant	MODERATE	p.Ala445Ser	NA
2F	16	14673665	T	C	RARRES2	missense_variant	MODERATE	p.Arg54Lys	NA
2F	17	19384734	T	C	EFR3B	stop_gained	HIGH	p.Gln90*	NA
2F	17	19384736	T	G	EFR3B	missense_variant	MODERATE	p.Gln90His	NA
2F	17	54359902	T	C	PTGFRN	stop_gained	HIGH	p.Arg473*	NA
2F	18	14377609	C	T	SYPL1	missense_variant	MODERATE	p.Met165Thr	NA
2F	18	31580645	C	T	C11orf74	missense_variant	MODERATE	p.Ile84Met	NA
2F	18	46074742	T	C	SYT8	stop_gained	HIGH	p.Gln261*	NA
2F	18	46074979	G	A	SYT8	missense_variant	MODERATE	p.Arg308Lys	NA
2F	18	49072795	C	G	IGHMBP2	missense_variant	MODERATE	p.Asp502Glu	NA
2F	18	49085733	C	CTCCCGG	IGHMBP2	disruptive_inframe_deletion	MODERATE	p.Asp128_Arg129del	NA
2F	18	52324667	A	G	CDC42BPG	missense_variant	MODERATE	p.Gln344Arg	NA
2F	18	52327745	G	A	CDC42BPG	missense_variant	MODERATE	p.Gly599Arg	NA
2F	1	73402179	CA	CAA	ZCCHC6	frameshift_variant	HIGH	p.Ile56fs	NA
2F	1	73402179	CA	CAA	ZCCHC6	frameshift_variant	HIGH	p.Ile56fs	NA
2F	20	32122541	C	A	ACOX2	missense_variant	MODERATE	p.Leu396Met	NA
2F	20	33747386	C	T	CCDC66	missense_variant	MODERATE	p.Ile92Met	NA
2F	20	37299598	A	G	NISCH	missense_variant	MODERATE	p.Ala128Val	NA
2F	20	39817657	G	C	AMT	missense_variant	MODERATE	p.Ala123Gly	NA
2F	20	40359447	G	A	PRKAR2A	missense_variant	MODERATE	p.Ile219Val	NA
2F	20	46974174	T	C	NOTCH3	missense_variant	MODERATE	p.Thr1786Ile	NA
2F	20	52886750	T	C	CD320	missense_variant	MODERATE	p.Asp179Asn	NA
2F	22	4627102	C	T	LRCH1	missense_variant	MODERATE	p.Ala369Thr	NA
2F	22	9054347	C	A	VWA8	missense_variant	MODERATE	p.Lys1461Thr	NA
2F	23	51982294	TA	T	GFM1	frameshift_variant	HIGH	p.Gly747fs	NA
2F	24	9350050	A	G	ISM1	missense_variant	MODERATE	p.Ala67Val	NA
2F	24	29203591	A	G	PLCG1	missense_variant	MODERATE	p.Ala373Thr	oncogene / fusion
2F	25	7857822	T	C	FRY	missense_variant	MODERATE	p.Arg2809Lys	NA
2F	27	8062822	CATG	C	SLC38A2	conservative_inframe_insertion	MODERATE	p.Met339dup	NA
2F	2	21612666	C	T	RPP38	missense_variant	MODERATE	p.Glu127Gly	NA
2F	2	32212047	G	A	PITRM1	missense_variant	MODERATE	p.Val593Met	NA
2F	2	58806941	A	G	ADGRG1	stop_gained	HIGH	p.Gln673*	NA
2F	2	58808044	G	A	ADGRG1	missense_variant	MODERATE	p.Ser622Pro	NA
2F	2	60429800	C	G	LPCAT2	missense_variant	MODERATE	p.Glu386Asp	NA
2F	2	79377855	T	C	EMC1	missense_variant	MODERATE	p.Leu432Phe	NA
2F	30	36092250	A	T	BBS4	missense_variant	MODERATE	p.Ser86Thr	NA
2F	30	39597175	G	A	SCAPER	missense_variant	MODERATE	p.Asn928Ser	NA
2F	33	23174983	G	C	TIMMDC1	missense_variant	MODERATE	p.Ser247Thr	NA
2F	33	26745417	T	C	MYLK	missense_variant	MODERATE	p.Ser1071Asn	NA
2F	33	29050419	C	T	MUC20	missense_variant	MODERATE	p.Tyr226His	NA
2F	33	29988300	C	T	MELTF	missense_variant	MODERATE	p.Ile567Val	NA
2F	33	30422678	C	T	BDH1	missense_variant	MODERATE	p.Ala45Thr	NA
2F	38	2862960	A	G	EIF2D	missense_variant	MODERATE	p.Ile291Thr	NA
2F	38	21880813	G	A	NCSTN	missense_variant	MODERATE	p.Leu465Ser	NA
2F	38	22098650	C	T	IGSF8	missense_variant	MODERATE	p.Ser317Pro	NA
2F	38	22222466	G	T	IGSF9	missense_variant	MODERATE	p.Ala1157Ser	NA
2F	3	579781	T	G	EPB41L4A	missense_variant	MODERATE	p.Arg42Leu	NA
2F	3	61084769	A	G	HTT	missense_variant	MODERATE	p.Ala2906Val	NA
2F	5	4652946	C	A	ST14	missense_variant	MODERATE	p.Gly825Trp	NA
2F	5	31679049	T	G	SLC25A11	missense_variant	MODERATE	p.Ala197Ser	NA
2F	5	32209155	CT	C	GABARAP	frameshift_variant	HIGH	p.Tyr49fs	NA
2F	5	32565114	T	C	TP53	missense_variant	MODERATE	p.Asp13Asn	oncogene / TSG / fusion
2F	5	39884983	C	T	ADORA2B	missense_variant	MODERATE	p.Val131Ile	NA
2F	5	56260122	A	C	AGRN	missense_variant	MODERATE	p.Ser409Tyr	NA
2F	5	76143116	C	T	GLG1	missense_variant	MODERATE	p.Trp564Arg	NA
2F	6	9109271	T	G	LRCH4	missense_variant	MODERATE	p.Ser237Ala	NA
2F	7	14043632	G	A	ACBD6	missense_variant	MODERATE	p.Ser30Pro	NA
2F	7	37562142	C	T	AHCTF1	missense_variant	MODERATE	p.Asp1485Gly	NA
2F	7	43502400	T	C	S100A6	missense_variant	MODERATE	p.Ala2Val	NA
2F	7	64408500	T	C	LAMA3	missense_variant	MODERATE	p.Arg3238Gln	NA
2F	7	64410289	C	T	LAMA3	missense_variant	MODERATE	p.Val3202Ile	NA
2F	7	64795894	A	G	NPC1	missense_variant	MODERATE	p.Arg934His	NA
2F	7	73325542	T	C	LAMA1	missense_variant&splice_region_variant	MODERATE	p.Gly2495Arg	NA
2F	9	31720864	C	T	TRIM25	missense_variant	MODERATE	p.Lys198Glu	NA
2F	9	55311610	C	A	CIZ1	missense_variant	MODERATE	p.Pro354His	NA
2F	X	7689225	G	A	HCCS	missense_variant	MODERATE	p.Ser55Asn	NA
2F	X	42023208	G	T	HDAC6	missense_variant	MODERATE	p.Tyr934Asp	NA
2F	X	106864860	A	AGAG	HTATSF1	conservative_inframe_insertion	MODERATE	p.Glu551dup	NA
2F	X	118989202	G	A	MTMR1	missense_variant	MODERATE	p.Gln538Arg	NA
2F	X	122079384	A	G	FLNA	missense_variant	MODERATE	p.Asn2161Asp	NA
3A	10	11566997	T	C	CCT2	missense_variant	MODERATE	p.Ala270Val	NA
3A	12	934997	G	A	DLA-12	missense_variant	MODERATE	p.Val218Ile	NA
3A	16	27074869	T	A	FGFR1	missense_variant	MODERATE	p.Met537Lys	oncogene / fusion
3A	18	54105454	A	T	AHNAK	missense_variant	MODERATE	p.Ile2311Phe	NA
3A	18	54111403	G	A	AHNAK	missense_variant	MODERATE	p.Val4294Ile	NA
3A	18	54111421	G	A	AHNAK	missense_variant	MODERATE	p.Asp4300Asn	NA
3A	1	55529517	C	CGAG,CGAGGAG	AFDN	conservative_inframe_insertion	MODERATE	p.Glu1705dup	NA
3A	22	58807563	C	T	COL4A2	missense_variant	MODERATE	p.Phe1091Leu	NA
3A	28	32220483	A	G	DMBT1	missense_variant	MODERATE	p.Ala365Thr	NA
3A	2	16025665	A	T	SVIL	missense_variant	MODERATE	p.Asn1620Ile	NA
3A	2	53523583	C	G	PIK3R1	missense_variant	MODERATE	p.Cys671Trp	TSG
3A	37	28901725	CA	C	ACSL3	frameshift_variant	HIGH	p.Asn97fs	fusion
3A	4	9813700	T	C	ACTA1	missense_variant	MODERATE	p.Ser200Pro	NA
3A	5	32209155	C	CT	GABARAP	frameshift_variant	HIGH	p.Tyr49fs	NA
3A	5	67965199	A	G	TLDC1	missense_variant	MODERATE	p.Arg43Gln	NA
3A	6	42242833	A	G	AMPD2	missense_variant	MODERATE	p.Arg545Cys	NA
3A	6	42286474	A	G	GNAI3	missense_variant	MODERATE	p.Arg176Trp	NA
3A	7	54392048	A	G	GALNT1	missense_variant	MODERATE	p.Ala527Val	NA
3A	8	3208864	C	CCCT	LRP10	disruptive_inframe_deletion	MODERATE	p.Leu11del	NA
3B	10	11566997	T	C	CCT2	missense_variant	MODERATE	p.Ala270Val	NA
3B	10	55526971	T	C	SPTBN1	missense_variant	MODERATE	p.Pro603Leu	NA
3B	12	934997	G	A	DLA-12	missense_variant	MODERATE	p.Val218Ile	NA
3B	15	3415920	T	C	MACF1	missense_variant	MODERATE	p.Gly5240Glu	NA
3B	15	14104625	C	CT	LRRC41	frameshift_variant	HIGH	p.Ser134fs	NA
3B	18	54105454	A	T	AHNAK	missense_variant	MODERATE	p.Ile2311Phe	NA
3B	30	11335597	G	A	B2M	missense_variant	MODERATE	p.Arg107His	TSG
3B	35	12738592	T	G	PHACTR1	missense_variant	MODERATE	p.Arg513Leu	NA
3B	4	154149	GT	G	ZNF248	frameshift_variant	HIGH	p.Pro350fs	NA
3B	5	80314834	A	G	NIP7	missense_variant	MODERATE	p.Arg184Trp	NA
3B	6	6889361	A	G	NSUN5	missense_variant	MODERATE	p.Gly163Ser	NA
3B	6	42242833	A	G	AMPD2	missense_variant	MODERATE	p.Arg545Cys	NA
3B	6	42286474	A	G	GNAI3	missense_variant	MODERATE	p.Arg176Trp	NA
3B	8	3208864	C	CCCT	LRP10	disruptive_inframe_deletion	MODERATE	p.Leu11del	NA
3B	8	13679509	CT	C	BAZ1A	frameshift_variant	HIGH	p.Ala74fs	NA
3B	8	14034070	GA	G	PSMA6	frameshift_variant	HIGH	p.Val183fs	NA
3B	9	21158450	A	C	KRT17	missense_variant	MODERATE	p.Asn210Thr	NA
3B	X	121820116	G	A	TMEM187	missense_variant	MODERATE	p.Met83Val	NA
3B	X	122079384	A	G	FLNA	missense_variant	MODERATE	p.Asn2161Asp	NA
3B	MT	9064	G	A	COX3	missense_variant	MODERATE	p.Gly141Arg	NA
3D	10	11566997	T	C	CCT2	missense_variant	MODERATE	p.Ala270Val	NA
3D	12	934997	G	A	DLA-12	missense_variant	MODERATE	p.Val218Ile	NA
3D	12	935007	G	A	DLA-12	missense_variant	MODERATE	p.His221Arg	NA
3D	12	2157116	A	C	HLA-DRB1	missense_variant	MODERATE	p.Ile127Ser	NA
3D	12	2157117	T	C	HLA-DRB1	missense_variant	MODERATE	p.Ile127Val	NA
3D	12	2157123	C	G	HLA-DRB1	missense_variant	MODERATE	p.Gly125Arg	NA
3D	18	45198836	C	T	CD151	missense_variant	MODERATE	p.Arg195Trp	NA
3D	18	54111403	G	A	AHNAK	missense_variant	MODERATE	p.Val4294Ile	NA
3D	18	54111421	G	A	AHNAK	missense_variant	MODERATE	p.Asp4300Asn	NA
3D	1	55529517	C	CGAG,CGAGGAG	AFDN	conservative_inframe_insertion	MODERATE	p.Glu1705dup	NA
3D	20	55470012	T	G	MAP2K2	missense_variant	MODERATE	p.Val85Gly	oncogene
3D	24	24641107	CT	C	RBM39	frameshift_variant	HIGH	p.Ser38fs	NA
3D	24	41585969	T	C	AURKA	missense_variant	MODERATE	p.Asn400Ser	NA
3D	26	23600717	T	C	SEC14L4	missense_variant	MODERATE	p.Gly396Asp	NA
3D	4	154149	GT	G	ZNF248	frameshift_variant	HIGH	p.Pro350fs	NA
3D	5	32209155	C	CT	GABARAP	frameshift_variant	HIGH	p.Tyr49fs	NA
3D	5	67908246	T	A	COTL1	missense_variant	MODERATE	p.Ser96Arg	NA
3D	5	80314834	A	G	NIP7	missense_variant	MODERATE	p.Arg184Trp	NA
3D	6	6889361	A	G	NSUN5	missense_variant	MODERATE	p.Gly163Ser	NA
3D	6	6899056	T	C	NSUN5	missense_variant	MODERATE	p.Phe418Leu	NA
3D	6	42242833	A	G	AMPD2	missense_variant	MODERATE	p.Arg545Cys	NA
3D	6	42286474	A	G	GNAI3	missense_variant	MODERATE	p.Arg176Trp	NA
3D	7	54392048	A	G	GALNT1	missense_variant	MODERATE	p.Ala527Val	NA
3D	8	3208864	C	CCCT	LRP10	disruptive_inframe_deletion	MODERATE	p.Leu11del	NA
3D	8	14034070	GA	G	PSMA6	frameshift_variant	HIGH	p.Val183fs	NA
3D	9	21158450	A	C	KRT17	missense_variant	MODERATE	p.Asn210Thr	NA
3D	X	121820116	G	A	TMEM187	missense_variant	MODERATE	p.Met83Val	NA
3D	MT	6228	A	G	MT-CO1	missense_variant	MODERATE	p.Thr294Ala	NA
4A	10	26477269	A	AGC	MAFF	frameshift_variant	HIGH	p.Leu29fs	NA
4A	12	894738	G	A	DLA88	missense_variant	MODERATE	p.Thr187Met	NA
4A	15	596816	A	T	C1orf50	missense_variant	MODERATE	p.Gln103Leu	NA
4A	17	21205032	A	G	CAD	missense_variant	MODERATE	p.Arg468His	NA
4A	17	25836208	T	C	BIRC6	missense_variant	MODERATE	p.Ser4612Phe	NA
4A	17	60283259	C	CT	PIP5K1A	frameshift_variant	HIGH	p.Leu282fs	NA
4A	1	107547207	T	C	BCAT2	missense_variant	MODERATE	p.Pro358Ser	NA
4A	20	46786619	T	G	AKAP8L	missense_variant	MODERATE	p.Gly345Val	NA
4A	20	53780243	A	AGCCTG	GTF2F1	frameshift_variant	HIGH	p.Ser570fs	NA
4A	26	6172552	A	G	KMT5A	missense_variant	MODERATE	p.Arg329Cys	NA
4A	26	29510720	C	T	GNB1L	missense_variant	MODERATE	p.Met344Thr	NA
4A	2	42739742	GA	G	SKIV2L2	frameshift_variant	HIGH	p.Val793fs	NA
4A	2	50746521	A	AGT	CWC27	frameshift_variant	HIGH	p.Val335fs	NA
4A	31	38970624	C	CCAG	SLC19A1	conservative_inframe_deletion	MODERATE	p.Leu74del	NA
4A	33	6425412	TA	T	COL8A1	frameshift_variant&stop_gained	HIGH	p.Tyr742fs	NA
4A	35	4362965	C	T	ECI2	missense_variant	MODERATE	p.Ala158Thr	NA
4A	5	76304368	T	C	AARS	missense_variant	MODERATE	p.Ala64Thr	NA
4A	6	7508086	AT	A	YWHAG	frameshift_variant	HIGH	p.Ile88fs	NA
4A	6	38794040	A	G	TRAF7	missense_variant	MODERATE	p.Leu133Phe	TSG
4A	6	58615888	GT	G	ZNF326	frameshift_variant	HIGH	p.Asn295fs	NA
4A	7	57984564	AT	A	DSG2	frameshift_variant	HIGH	p.Ile843fs	NA
4A	8	4174848	A	G	IPO4	missense_variant	MODERATE	p.Ala668Val	NA
4A	X	122079384	A	G	FLNA	missense_variant	MODERATE	p.Asn2161Asp	NA
4B	12	1329530	G	GA	SLC44A4	frameshift_variant	HIGH	p.Phe616fs	NA
4B	18	38811666	AC	A	SSRP1	frameshift_variant	HIGH	p.Ser700fs	NA
4B	1	66051605	GT	G	ECHDC1	frameshift_variant	HIGH	p.Leu41fs	NA
4B	20	39031927	T	C	HYAL2	missense_variant	MODERATE	p.Pro65Ser	NA
4B	20	42239674	C	CA	LTF	frameshift_variant	HIGH	p.Cys38fs	NA
4B	20	44026117	T	G	TMEM161A	missense_variant	MODERATE	p.Ala147Ser	NA
4B	21	32948907	C	CA	SWAP70	frameshift_variant	HIGH	p.Asn102fs	NA
4B	23	51982294	TA	T	GFM1	frameshift_variant	HIGH	p.Gly747fs	NA
4B	26	6172552	A	G	KMT5A	missense_variant	MODERATE	p.Arg329Cys	NA
4B	27	25104221	T	A	CMAS	missense_variant	MODERATE	p.Met227Lys	NA
4B	2	42739742	GA	G	SKIV2L2	frameshift_variant	HIGH	p.Val793fs	NA
4B	30	16630845	A	G	SPPL2A	stop_gained	HIGH	p.Gln8*	NA
4B	37	10013963	G	GA	BZW1	frameshift_variant	HIGH	p.Asn317fs	NA
4B	4	59035669	A	AGC	HMGXB3	frameshift_variant	HIGH	p.Leu568fs	NA
4B	5	4976283	C	T	NFRKB	stop_gained	HIGH	p.Gln967*	NA
4B	5	76304368	T	C	AARS	missense_variant	MODERATE	p.Ala64Thr	NA
4B	7	57984564	AT	A	DSG2	frameshift_variant	HIGH	p.Ile843fs	NA
4B	8	4174848	A	G	IPO4	missense_variant	MODERATE	p.Ala668Val	NA
4B	9	21158450	A	C	KRT17	missense_variant	MODERATE	p.Asn210Thr	NA
4B	9	51323396	T	G	RALGDS	missense_variant	MODERATE	p.Phe557Cys	NA
4E	10	23764584	G	A	ACO2	missense_variant	MODERATE	p.Arg18Trp	NA
4E	12	17335812	C	A	MUT	missense_variant	MODERATE	p.Ala137Ser	TSG
4E	15	3397505	A	AT	MACF1	frameshift_variant	HIGH	p.Ile6254fs	NA
4E	17	7371018	G	GT	ODC1	frameshift_variant	HIGH	p.Leu295fs	NA
4E	18	54111403	A	G	AHNAK	missense_variant	MODERATE	p.Val4294Ile	NA
4E	1	25087289	C	T	MOXD1	missense_variant	MODERATE	p.Ala341Val	NA
4E	1	66051605	GT	G	ECHDC1	frameshift_variant	HIGH	p.Leu41fs	NA
4E	20	2083775	C	T	SEC61A1	missense_variant	MODERATE	p.Ala381Val	NA
4E	20	49815811	C	T	ACP5	missense_variant	MODERATE	p.Pro307Ser	NA
4E	20	53780243	A	AGCCTG	GTF2F1	frameshift_variant	HIGH	p.Ser570fs	NA
4E	20	55470012	T	G	MAP2K2	missense_variant	MODERATE	p.Val85Gly	oncogene
4E	21	25918447	T	C	FOLR2	missense_variant	MODERATE	p.Ser84Gly	NA
4E	26	6172552	A	G	KMT5A	missense_variant	MODERATE	p.Arg329Cys	NA
4E	31	38970624	C	CCAG	SLC19A1	conservative_inframe_deletion	MODERATE	p.Leu74del	NA
4E	35	15447598	G	T	GMPR	missense_variant	MODERATE	p.Lys298Asn	NA
4E	6	40615097	G	A	ATP5F1	missense_variant	MODERATE	p.Arg208Cys	NA
4E	9	54955937	G	A	SPTAN1	stop_gained	HIGH	p.Gln2249*	NA
6B	11	17962325	C	T	SLC27A6	missense_variant	MODERATE	p.Ala492Val	NA
6B	11	53855046	C	A	FBXO10	missense_variant	MODERATE	p.Lys224Asn	NA
6B	13	48168179	A	G	EXOC1	missense_variant	MODERATE	p.Ala685Thr	NA
6B	13	59438646	A	T	CSN2	missense_variant	MODERATE	p.Gln235His	NA
6B	15	14706841	C	T	GPBP1L1	synonymous_variant	LOW	p.Gly52Gly	NA
6B	15	14706841	C	T	GPBP1L1	intron_variant	MODIFIER		NA
6B	16	5427426	C	CA	TPK1	frameshift_variant	HIGH	p.Ile112fs	NA
6B	17	21034316	C	CT	TMEM214	frameshift_variant&stop_gained	HIGH	p.Asp198fs	NA
6B	18	12598910	T	G	LAMB4	missense_variant	MODERATE	p.Asp1556Tyr	NA
6B	18	46294340	G	A	IGF2	missense_variant	MODERATE	p.Pro192Leu	NA
6B	19	12190434	GT	G	JADE1	frameshift_variant	HIGH	p.Asn794fs	NA
6B	19	35276987	CT	C	SLC35F5	frameshift_variant	HIGH	p.Cys249fs	NA
6B	1	14517163	G	A	TNFRSF11A	missense_variant	MODERATE	p.Ala481Val	NA
6B	20	32408025	C	T	FLNB	missense_variant&splice_region_variant	MODERATE	p.Gln2327Arg	NA
6B	21	40704188	G	T	SAA1	missense_variant	MODERATE	p.Arg89Leu	NA
6B	21	40704190	C	T	SAA1	missense_variant	MODERATE	p.Leu90Phe	NA
6B	23	7191724	CA	C	GOLGA4	frameshift_variant	HIGH	p.Ile1666fs	NA
6B	26	5815865	C	T	DNAH10	missense_variant	MODERATE	p.Arg2761His	NA
6B	30	11335597	G	A	B2M	missense_variant	MODERATE	p.Arg107His	TSG
6B	30	29919309	C	CA	HACD3	frameshift_variant	HIGH	p.Lys464fs	NA
6B	30	36580765	A	G	NEO1	stop_gained	HIGH	p.Trp679*	NA
6B	32	7397569	G	T	GPAT3	missense_variant	MODERATE	p.Ala205Ser	NA
6B	3	73523019	C	CT	TLR6	frameshift_variant	HIGH	p.Trp774fs	NA
6B	4	75072362	TA	T	ZFR	frameshift_variant	HIGH	p.Glu360fs	NA
6B	5	24402853	AT	A	CUL5	frameshift_variant	HIGH	p.Asn544fs	NA
6B	5	31707265	A	G	CHRNE	missense_variant	MODERATE	p.Val443Ile	NA
6B	5	31707266	G	T	CHRNE	missense_variant	MODERATE	p.Val443Gly	NA
6B	5	52924616	C	T	PLPP3	missense_variant	MODERATE	p.Ala9Val	NA
6B	5	81569898	T	C	PSKH1	missense_variant	MODERATE	p.Arg332His	NA
6B	6	10991867	G	A	BAIAP2L1	missense_variant	MODERATE	p.Gly34Glu	NA
6B	7	38529606	CA	C	PARP1	frameshift_variant	HIGH	p.Phe600fs	NA
6B	7	75289729	GA	GAA	ANKRD12	frameshift_variant	HIGH	p.Asn932fs	NA
6B	7	75289729	GA	GAA	ANKRD12	frameshift_variant	HIGH	p.Asn909fs	NA
6B	9	3059857	C	CT	TNRC6C	frameshift_variant	HIGH	p.Gly1130fs	NA
6B	9	21158450	A	C	KRT17	missense_variant	MODERATE	p.Asn210Thr	NA
6B	9	34144842	C	T	CLTC	missense_variant	MODERATE	p.Ala198Val	TSG / fusion
6B	9	46146739	A	G	DPH1	missense_variant	MODERATE	p.Thr402Ala	NA
6C	10	449103	A	G	ESYT1	missense_variant	MODERATE	p.Gly83Ser	NA
6C	10	26932790	A	T	LGALS1	missense_variant	MODERATE	p.Leu134His	NA
6C	10	27465476	C	T	MPST	missense_variant	MODERATE	p.Arg232His	NA
6C	10	33251552	A	AT	WASHC4	frameshift_variant	HIGH	p.Asn1042fs	NA
6C	10	60598383	A	G	BCL11A	missense_variant	MODERATE	p.Ser614Leu	oncogene / fusion
6C	10	63326668	C	T	MDH1	missense_variant	MODERATE	p.Ala134Val	NA
6C	12	934167	T	G	DLA-12	missense_variant	MODERATE	p.Ser138Arg	NA
6C	12	35673719	T	TA	SLC17A5	frameshift_variant	HIGH	p.Tyr117fs	NA
6C	14	25925093	CA	C	PHF14	frameshift_variant	HIGH	p.Met215fs	NA
6C	16	44209885	T	C	FAT1	missense_variant	MODERATE	p.Ser1664Phe	TSG
6C	16	54367800	C	T	ARHGEF10	missense_variant	MODERATE	p.Thr1036Met	NA
6C	18	45142617	G	A	ACCS	missense_variant	MODERATE	p.Leu515Pro	NA
6C	18	45197284	G	A	CD151	missense_variant	MODERATE	p.Gly20Glu	NA
6C	18	45198836	C	T	CD151	missense_variant	MODERATE	p.Arg195Trp	NA
6C	18	45336631	C	CA	AP2A2	frameshift_variant	HIGH	p.Val223fs	NA
6C	18	46072974	G	A	SYT8	missense_variant	MODERATE	p.His24Arg	NA
6C	18	46074742	C	T	SYT8	stop_gained	HIGH	p.Gln261*	NA
6C	18	46074979	A	G	SYT8	missense_variant	MODERATE	p.Arg308Lys	NA
6C	18	46294340	G	A	IGF2	missense_variant	MODERATE	p.Pro192Leu	NA
6C	19	35276987	CT	C	SLC35F5	frameshift_variant	HIGH	p.Cys249fs	NA
6C	1	48553845	G	C	FNDC1	missense_variant	MODERATE	p.Val270Leu	NA
6C	1	49220135	G	A	IGF2R	missense_variant	MODERATE	p.His742Arg	NA
6C	1	49261819	AAAG	A	IGF2R	disruptive_inframe_deletion	MODERATE	p.Lys2427_Val2428delinsMet	NA
6C	1	85967280	CA	C	TMEM2	frameshift_variant	HIGH	p.Phe221fs	NA
6C	20	41086446	G	GA	MAP4	frameshift_variant	HIGH	p.Thr944fs	NA
6C	21	31308526	G	A	PPFIBP2	missense_variant	MODERATE	p.Lys845Arg	NA
6C	21	31322854	A	G	CYB5R2	missense_variant	MODERATE	p.Leu47Pro	NA
6C	21	40647640	C	T	SAA1	missense_variant	MODERATE	p.Asp93Asn	NA
6C	21	40647648	C	T	SAA1	missense_variant	MODERATE	p.Arg90Lys	NA
6C	22	624187	C	CA	INTS6	frameshift_variant	HIGH	p.Val412fs	NA
6C	22	58809202	A	T	COL4A2	missense_variant	MODERATE	p.Thr1180Ser	NA
6C	23	7191724	CA	C	GOLGA4	frameshift_variant	HIGH	p.Ile1666fs	NA
6C	25	34867214	T	C	SLC39A14	missense_variant	MODERATE	p.Arg108Gln	NA
6C	26	29998555	C	T	CLTCL1	missense_variant	MODERATE	p.Ala1537Val	TSG / fusion
6C	2	30694778	C	T	AKR1E2	missense_variant	MODERATE	p.Ser302Asn	NA
6C	2	69600875	A	C	SERINC2	missense_variant	MODERATE	p.Cys439Phe	NA
6C	2	69602087	G	T	SERINC2	missense_variant	MODERATE	p.Asn352His	NA
6C	30	36580765	A	G	NEO1	stop_gained	HIGH	p.Trp679*	NA
6C	30	39586476	T	C	SCAPER	missense_variant	MODERATE	p.Met891Thr	NA
6C	33	26737847	C	G,T	MYLK	missense_variant	MODERATE	p.Val1199Leu	NA
6C	34	26485748	C	CA	SMC4	frameshift_variant	HIGH	p.Gln856fs	NA
6C	37	24813038	A	G	RUFY4	missense_variant	MODERATE	p.Ala62Thr	NA
6C	3	39011511	A	G	TJP1	missense_variant	MODERATE	p.Ala1198Val	NA
6C	4	24494941	A	G	VCL	missense_variant	MODERATE	p.Ala487Thr	NA
6C	5	30146130	G	A	ZZEF1	missense_variant	MODERATE	p.Ala2554Val	NA
6C	5	33107029	G	T	ARHGEF15	missense_variant	MODERATE	p.Ala769Ser	NA
6C	6	11451576	C	G	EIF2AK1	missense_variant	MODERATE	p.Gly479Arg	NA
6C	7	8282076	G	A	LAMB3	missense_variant	MODERATE	p.Ala800Val	NA
6C	7	58065348	C	T	DSG3	missense_variant	MODERATE	p.Val131Ile	NA
6C	7	64408500	C	T	LAMA3	missense_variant	MODERATE	p.Arg3238Gln	NA
6C	7	64410289	T	C	LAMA3	missense_variant	MODERATE	p.Val3202Ile	NA
6C	7	64428028	A	T	LAMA3	missense_variant	MODERATE	p.Glu2834Asp	NA
6C	7	64428050	T	C	LAMA3	missense_variant	MODERATE	p.Arg2827His	NA
6C	7	64428051	A	G	LAMA3	missense_variant	MODERATE	p.Arg2827Cys	NA
6C	7	64448862	C	G	LAMA3	missense_variant	MODERATE	p.Gln2253Glu	NA
6C	7	73325542	T	C	LAMA1	missense_variant&splice_region_variant	MODERATE	p.Gly2495Arg	NA
6C	9	3059857	C	CT	TNRC6C	frameshift_variant	HIGH	p.Gly1130fs	NA
6D	12	12572436	A	G	TMEM63B	missense_variant	MODERATE	p.Gln620Arg	NA
6D	13	38420377	G	GT	IREB2	frameshift_variant	HIGH	p.Asn218fs	NA
6D	13	59438646	A	T	CSN2	missense_variant	MODERATE	p.Gln235His	NA
6D	13	59438781	C	T	CSN2	missense_variant	MODERATE	p.Met190Ile	NA
6D	18	17687864	CA	C	PTPN12	frameshift_variant	HIGH	p.Ile683fs	NA
6D	19	35276987	CT	C	SLC35F5	frameshift_variant	HIGH	p.Cys249fs	NA
6D	20	37327722	G	T	SEMA3G	missense_variant	MODERATE	p.Gln471His	NA
6D	22	26912029	G	A	DIS3	missense_variant	MODERATE	p.Ala728Val	NA
6D	24	5349868	G	GA	RRBP1	frameshift_variant	HIGH	p.Val146fs	NA
6D	24	24507665	A	G	ERGIC3	missense_variant	MODERATE	p.Ser352Gly	NA
6D	32	21789509	T	C	DAPP1	missense_variant	MODERATE	p.Phe83Leu	NA
6D	36	20993636	G	A	NFE2L2	missense_variant	MODERATE	p.Ala91Val	oncogene / TSG
6D	38	21310340	C	G	PPOX	missense_variant	MODERATE	p.Gly51Arg	NA
6D	5	32209155	CT	C	GABARAP	frameshift_variant	HIGH	p.Tyr49fs	NA
6D	6	58615888	G	GT	ZNF326	frameshift_variant	HIGH	p.Asn295fs	NA
6D	X	121807016	G	A	HCFC1	missense_variant	MODERATE	p.Pro199Leu	NA
8A	10	26681494	T	G	SOX10	missense_variant	MODERATE	p.Ala99Ser	NA
8A	10	26681504	A	G	SOX10	missense_variant	MODERATE	p.Ser102Asn	NA
8A	1	16894598	CA	C	LMAN1	frameshift_variant	HIGH	p.Phe517fs	NA
8A	21	32948907	C	CA	SWAP70	frameshift_variant	HIGH	p.Asn102fs	NA
8A	26	10446344	G	T	OAS2	missense_variant	MODERATE	p.Ala581Ser	NA
8A	26	16097850	A	G	GCN1	missense_variant	MODERATE	p.Ala2285Val	NA
8A	2	74549512	G	GA	RSRP1	frameshift_variant	HIGH	p.Ile300fs	NA
8A	32	13184120	T	C	MMRN1	missense_variant	MODERATE	p.Ile1167Thr	NA
8A	3	53364623	T	C	FURIN	missense_variant	MODERATE	p.His81Arg	NA
8A	5	32563391	T	C	TP53	missense_variant	MODERATE	p.Arg238Gln	oncogene / TSG / fusion
8A	5	67908246	A	T	COTL1	missense_variant	MODERATE	p.Ser96Arg	NA
8A	6	52302923	C	T	DPYD	missense_variant	MODERATE	p.Ala638Val	NA
8A	7	45390439	G	A	SLC14A1	missense_variant	MODERATE	p.Ala183Val	NA
8A	8	37947497	C	T	PPP2R5E	stop_gained	HIGH	p.Trp447*	NA
8A	8	65281153	C	G	PAPOLA	missense_variant	MODERATE	p.Leu741Val	NA
8A	X	122079384	G	A	FLNA	missense_variant	MODERATE	p.Asn2161Asp	NA
8B	10	22687747	CA	C	ARFGAP3	frameshift_variant	HIGH	p.Ile453fs	NA
8B	10	25537103	T	C	MIEF1	missense_variant	MODERATE	p.Ala397Thr	NA
8B	10	28508928	G	A	APOL5	missense_variant	MODERATE	p.His124Tyr	NA
8B	15	14104625	CT	C	LRRC41	frameshift_variant	HIGH	p.Ser134fs	NA
8B	17	53843909	T	A	ATP1A1	missense_variant	MODERATE	p.Leu966Gln	oncogene / TSG
8B	18	17687864	CA	C	PTPN12	frameshift_variant	HIGH	p.Ile683fs	NA
8B	18	54111403	A	G	AHNAK	missense_variant	MODERATE	p.Val4294Ile	NA
8B	1	16894598	CA	C	LMAN1	frameshift_variant	HIGH	p.Phe517fs	NA
8B	1	82458249	GT	G	PCSK5	frameshift_variant	HIGH	p.Arg16fs	NA
8B	20	42239674	CA	C	LTF	frameshift_variant	HIGH	p.Cys38fs	NA
8B	23	51982294	T	TA	GFM1	frameshift_variant	HIGH	p.Gly747fs	NA
8B	26	16097850	A	G	GCN1	missense_variant	MODERATE	p.Ala2285Val	NA
8B	26	22760700	GT	G	THOC5	frameshift_variant	HIGH	p.Thr413fs	NA
8B	2	16025665	A	T	SVIL	missense_variant	MODERATE	p.Asn1620Ile	NA
8B	2	74549512	G	GA	RSRP1	frameshift_variant	HIGH	p.Ile300fs	NA
8B	5	32563391	T	C	TP53	missense_variant	MODERATE	p.Arg238Gln	oncogene / TSG / fusion
8B	7	29409438	G	A	NME7	missense_variant	MODERATE	p.Arg334Gln	NA
8B	7	29409516	C	T	NME7	missense_variant	MODERATE	p.Pro360Leu	NA
8B	8	70873306	A	T	CDC42BPB	missense_variant	MODERATE	p.Val81Glu	NA
8B	X	101199811	A	G	BCORL1	missense_variant	MODERATE	p.Ser1522Gly	oncogene / TSG
8B	MT	8378	C	T	MT-ATP6	missense_variant	MODERATE	p.Pro139Ser	NA
8B	JH373278.1	358374	CT	C	DDX56	frameshift_variant	HIGH	p.Leu95fs	NA
8C	10	22687747	CA	C	ARFGAP3	frameshift_variant	HIGH	p.Ile453fs	NA
8C	10	26681494	T	G	SOX10	missense_variant	MODERATE	p.Ala99Ser	NA
8C	10	26681504	A	G	SOX10	missense_variant	MODERATE	p.Ser102Asn	NA
8C	12	935928	T	C	DLA-12	missense_variant&splice_region_variant	MODERATE	p.Arg345Cys	NA
8C	14	43339149	T	A	GARS	splice_donor_variant&intron_variant	HIGH		NA
8C	17	6431753	T	C	ASAP2	missense_variant	MODERATE	p.Tyr75His	NA
8C	18	16848293	CT	C	PSMC2	frameshift_variant	HIGH	p.Ala269fs	NA
8C	18	17687864	CA	C	PTPN12	frameshift_variant	HIGH	p.Ile683fs	NA
8C	18	45198836	T	C	CD151	missense_variant	MODERATE	p.Arg195Trp	NA
8C	1	16894598	CA	C	LMAN1	frameshift_variant	HIGH	p.Phe517fs	NA
8C	1	99409160	AG	A	TRIM28	frameshift_variant	HIGH	p.Leu814fs	NA
8C	20	42239674	CA	C	LTF	frameshift_variant	HIGH	p.Cys38fs	NA
8C	24	5349868	GA	G	RRBP1	frameshift_variant	HIGH	p.Val146fs	NA
8C	24	18565298	T	C	NOP56	missense_variant	MODERATE	p.Glu74Gly	NA
8C	25	35244739	C	A	XPO7	missense_variant	MODERATE	p.Glu822Asp	NA
8C	26	16097850	A	G	GCN1	missense_variant	MODERATE	p.Ala2285Val	NA
8C	26	22760700	GT	G	THOC5	frameshift_variant	HIGH	p.Thr413fs	NA
8C	28	32590207	G	GA	ACADSB	frameshift_variant	HIGH	p.Met253fs	NA
8C	2	16025665	A	T	SVIL	missense_variant	MODERATE	p.Asn1620Ile	NA
8C	36	14345382	C	CA	PPIG	frameshift_variant	HIGH	p.Arg230fs	NA
8C	5	32563391	T	C	TP53	missense_variant	MODERATE	p.Arg238Gln	oncogene / TSG / fusion
8C	5	67908246	A	T	COTL1	missense_variant	MODERATE	p.Ser96Arg	NA
8C	8	10412259	AT	A	HECTD1	frameshift_variant	HIGH	p.Ile2040fs	NA
8C	8	70873306	A	T	CDC42BPB	missense_variant	MODERATE	p.Val81Glu	NA
8C	9	3059857	C	CT	TNRC6C	frameshift_variant	HIGH	p.Gly1130fs	NA
8C	9	32583879	C	T	CUEDC1	missense_variant	MODERATE	p.Gly92Ser	NA
8C	X	55574247	C	T	GJB1	missense_variant	MODERATE	p.Ala147Val	NA
8C	X	80345039	A	C	RNF128	missense_variant	MODERATE	p.Arg361Ser	NA
8C	X	122079384	G	A	FLNA	missense_variant	MODERATE	p.Asn2161Asp	NA
8E	10	22687747	CA	C	ARFGAP3	frameshift_variant	HIGH	p.Ile453fs	NA
8E	12	63683345	T	A	ATG5	missense_variant	MODERATE	p.Glu26Val	NA
8E	17	22700915	T	TTTG,TTTTG	PPP1CB	frameshift_variant	HIGH	p.Leu337fs	NA
8E	1	16894598	CA	C	LMAN1	frameshift_variant	HIGH	p.Phe517fs	NA
8E	1	66051605	GT	G	ECHDC1	frameshift_variant	HIGH	p.Leu41fs	NA
8E	1	82458249	GT	G	PCSK5	frameshift_variant	HIGH	p.Arg16fs	NA
8E	20	42239674	CA	C	LTF	frameshift_variant	HIGH	p.Cys38fs	NA
8E	24	5349868	GA	G	RRBP1	frameshift_variant	HIGH	p.Val146fs	NA
8E	26	16097850	A	G	GCN1	missense_variant	MODERATE	p.Ala2285Val	NA
8E	26	22760700	GT	G	THOC5	frameshift_variant	HIGH	p.Thr413fs	NA
8E	2	21612214	G	GT	RPP38	frameshift_variant	HIGH	p.Pro278fs	NA
8E	3	73522242	G	A	TLR6	missense_variant	MODERATE	p.Asp513Asn	NA
8E	5	15150535	G	GT	ARCN1	frameshift_variant	HIGH	p.Leu337fs	NA
8E	5	32563391	T	C	TP53	missense_variant	MODERATE	p.Arg238Gln	oncogene / TSG / fusion
8E	5	67908246	A	T	COTL1	missense_variant	MODERATE	p.Ser96Arg	NA
8E	5	76143116	T	C	GLG1	missense_variant	MODERATE	p.Trp564Arg	NA
8E	7	42428196	A	C	EFNA4	missense_variant	MODERATE	p.Trp178Gly	NA
8E	9	3059857	C	CT	TNRC6C	frameshift_variant	HIGH	p.Gly1130fs	NA
8E	9	5502837	C	T	HID1	missense_variant	MODERATE	p.Arg658Trp	NA
8E	9	37589361	G	A	HEATR6	missense_variant	MODERATE	p.Ala617Val	NA
8E	9	49016063	G	T	NOTCH1	stop_gained	HIGH	p.Glu2165*	oncogene / TSG / fusion
9A	11	64044895	A	C	ELP1	missense_variant	MODERATE	p.Glu1201Asp	NA
9A	12	894939	A	C	DLA88	missense_variant	MODERATE	p.Ile120Ser	NA
9A	12	894940	T	G	DLA88	missense_variant	MODERATE	p.Ile120Leu	NA
9A	12	934167	G	T	DLA-12	missense_variant	MODERATE	p.Ser138Arg	NA
9A	13	4367227	C	T	AZIN1	missense_variant	MODERATE	p.Ser367Gly	NA
9A	13	19287129	G	GT	MRPL13	frameshift_variant	HIGH	p.Asn115fs	NA
9A	13	37468037	C	T	PLEC	missense_variant	MODERATE	p.Asp563Asn	NA
9A	15	35397166	T	C	METAP2	missense_variant	MODERATE	p.Ser391Pro	NA
9A	15	35397171	T	G	METAP2	missense_variant	MODERATE	p.His392Gln	NA
9A	16	27074869	A	T	FGFR1	missense_variant	MODERATE	p.Met537Lys	oncogene / fusion
9A	17	20181896	T	A	RAB10	missense_variant	MODERATE	p.Leu14Gln	NA
9A	17	53843909	T	A	ATP1A1	missense_variant	MODERATE	p.Leu966Gln	oncogene / TSG
9A	20	32408025	C	T	FLNB	missense_variant&splice_region_variant	MODERATE	p.Gln2327Arg	NA
9A	21	42387190	G	A	HTATIP2	missense_variant	MODERATE	p.Gly86Ser	NA
9A	22	46247058	C	T	DZIP1	missense_variant	MODERATE	p.Ala472Thr	NA
9A	23	43902568	AT	A	HLTF	frameshift_variant	HIGH	p.Asn326fs	NA
9A	26	23527056	T	C	RNF215	missense_variant	MODERATE	p.Val260Ile	NA
9A	26	23600717	T	C	SEC14L4	missense_variant	MODERATE	p.Gly396Asp	NA
9A	26	29510720	T	C	GNB1L	missense_variant	MODERATE	p.Met344Thr	NA
9A	26	29530005	T	C	TBX1	missense_variant&splice_region_variant	MODERATE	p.Ala191Thr	NA
9A	2	81470101	A	G	RSG1	missense_variant	MODERATE	p.Arg38His	NA
9A	2	84003482	A	G	VPS13D	missense_variant	MODERATE	p.Leu3756Pro	NA
9A	2	84963330	CA	C	EXOSC10	frameshift_variant	HIGH	p.Leu882fs	NA
9A	37	10013963	GA	G	BZW1	frameshift_variant	HIGH	p.Asn317fs	NA
9A	3	61008341	C	T	RGS12	missense_variant	MODERATE	p.Val231Ile	NA
9A	3	74367520	C	G	PGM2	missense_variant	MODERATE	p.Ala198Pro	NA
9A	4	55011451	G	T	LARP1	missense_variant	MODERATE	p.Asp281Glu	NA
9A	4	58467013	C	T	RBM22	missense_variant	MODERATE	p.Thr262Met	NA
9A	5	28920225	G	A	MMP12	missense_variant	MODERATE	p.Glu49Lys	NA
9A	6	14473454	C	T	GNA12	missense_variant	MODERATE	p.Thr181Met	NA
9A	9	47703255	G	GA	ATP2A3	frameshift_variant	HIGH	p.Arg838fs	NA
9A	X	81166927	T	A	PRPS1	missense_variant	MODERATE	p.Glu195Asp	NA
9B	12	934167	G	T	DLA-12	missense_variant	MODERATE	p.Ser138Arg	NA
9B	12	934997	G	T	DLA-12	missense_variant	MODERATE	p.Val218Phe	NA
9B	12	985574	T	C	DLA-64	missense_variant	MODERATE	p.Ala291Val	NA
9B	15	14104625	C	CT	LRRC41	frameshift_variant	HIGH	p.Ser134fs	NA
9B	16	27074869	A	T	FGFR1	missense_variant	MODERATE	p.Met537Lys	oncogene / fusion
9B	17	7371018	G	GT	ODC1	frameshift_variant	HIGH	p.Leu295fs	NA
9B	24	24641107	C	CT	RBM39	frameshift_variant	HIGH	p.Ser38fs	NA
9B	2	65020547	C	T	ADCY7	missense_variant	MODERATE	p.Val338Ile	NA
9B	34	17079846	G	A	AP2M1	missense_variant	MODERATE	p.Ala396Thr	NA
9B	37	10013963	GA	G	BZW1	frameshift_variant	HIGH	p.Asn317fs	NA
9B	38	22228312	C	T	TAGLN2	missense_variant	MODERATE	p.Ala24Val	NA
9B	5	75181530	A	T	KARS	missense_variant	MODERATE	p.Glu178Asp	NA
9B	5	75181531	G	C	KARS	missense_variant	MODERATE	p.Gly179Arg	NA
9B	6	32053659	C	T	EMP2	missense_variant	MODERATE	p.Ala36Val	NA
9B	X	1411530	C	T	CD99	missense_variant	MODERATE	p.Ala36Val	NA
9B	X	122068495	T	C	FLNA	missense_variant	MODERATE	p.Pro718Ser	NA
9B	MT	13973	T	C	ND6	missense_variant	MODERATE	p.Asn46Ser	NA
9C	11	64044895	A	C	ELP1	missense_variant	MODERATE	p.Glu1201Asp	NA
9C	16	27074869	A	T	FGFR1	missense_variant	MODERATE	p.Met537Lys	oncogene / fusion
9C	20	46891841	G	A	BRD4	missense_variant	MODERATE	p.Val90Ile	oncogene / fusion
9C	23	43902568	AT	A	HLTF	frameshift_variant	HIGH	p.Asn326fs	NA
9C	24	5349868	G	GA	RRBP1	frameshift_variant	HIGH	p.Val146fs	NA
9C	27	14293501	C	CAT	KIF21A	frameshift_variant	HIGH	p.Met1088fs	NA
9C	2	72914204	T	C	MAP3K6	missense_variant	MODERATE	p.Arg925Trp	NA
9C	2	84963330	CA	C	EXOSC10	frameshift_variant	HIGH	p.Leu882fs	NA
9C	30	29582855	C	A	CILP	missense_variant	MODERATE	p.Gly78Val	NA
9C	30	36454758	A	G	NEO1	stop_gained	HIGH	p.Trp90*	NA
9C	34	12675674	A	G	PIK3CA	missense_variant	MODERATE	p.His1047Arg	oncogene
9C	37	10013963	GA	G	BZW1	frameshift_variant	HIGH	p.Asn317fs	NA
9C	4	36051965	GTGC	G	PRELID1	disruptive_inframe_deletion	MODERATE	p.Gln216del	NA
9C	5	21396398	G	A	SIK2	missense_variant	MODERATE	p.Arg141Cys	NA
9C	5	32209155	C	CT	GABARAP	frameshift_variant	HIGH	p.Tyr49fs	NA
9C	6	38297099	G	GA	SRRM2	frameshift_variant	HIGH	p.Lys193fs	NA
9C	8	3190747	T	G	MMP14	missense_variant	MODERATE	p.Val343Gly	NA
9C	9	3059857	C	CT	TNRC6C	frameshift_variant	HIGH	p.Gly1130fs	NA
9C	X	101199811	G	A	BCORL1	missense_variant	MODERATE	p.Ser1522Gly	oncogene / TSG
9C	X	122068495	C	T	FLNA	missense_variant	MODERATE	p.Pro718Ser	NA
9E	10	26681494	G	T	SOX10	missense_variant	MODERATE	p.Ala99Ser	NA
9E	11	64044895	A	C	ELP1	missense_variant	MODERATE	p.Glu1201Asp	NA
9E	12	2157116	C	A	HLA-DRB1	missense_variant	MODERATE	p.Ile127Ser	NA
9E	12	2157117	C	T	HLA-DRB1	missense_variant	MODERATE	p.Ile127Val	NA
9E	12	39909747	G	C	PHIP	missense_variant	MODERATE	p.Ser1558Thr	NA
9E	13	4367227	C	T	AZIN1	missense_variant	MODERATE	p.Ser367Gly	NA
9E	15	14104625	C	CT	LRRC41	frameshift_variant	HIGH	p.Ser134fs	NA
9E	17	22700915	T	TTTG,TTTTG	PPP1CB	frameshift_variant	HIGH	p.Leu337fs	NA
9E	17	37550447	C	T	IGKV2D-26	missense_variant	MODERATE	p.Phe3Ser	NA
9E	17	37551218	G	C	IGKV2D-26	missense_variant	MODERATE	p.Thr68Ser	NA
9E	18	32392525	A	C	FJX1	missense_variant	MODERATE	p.Val293Gly	NA
9E	1	102514481	G	GA	PPP1R12C	frameshift_variant	HIGH	p.Glu673fs	NA
9E	20	40678389	T	G	PLXNB1	missense_variant	MODERATE	p.Val1813Gly	NA
9E	21	32477693	AT	A	DENND5A	frameshift_variant	HIGH	p.Lys896fs	NA
9E	23	4139881	GT	G	PDCD6IP	frameshift_variant	HIGH	p.Leu201fs	NA
9E	23	43902568	AT	A	HLTF	frameshift_variant	HIGH	p.Asn326fs	NA
9E	24	24641107	C	CT	RBM39	frameshift_variant	HIGH	p.Ser38fs	NA
9E	2	74549512	G	GA	RSRP1	frameshift_variant	HIGH	p.Ile300fs	NA
9E	2	84963330	CA	C	EXOSC10	frameshift_variant	HIGH	p.Leu882fs	NA
9E	32	532303	C	T	SDAD1	missense_variant	MODERATE	p.Lys150Glu	NA
9E	33	28235645	GT	G	ZNF148	frameshift_variant	HIGH	p.Thr320fs	NA
9E	4	23945047	A	AT	ANXA7	frameshift_variant	HIGH	p.Ile223fs	NA
9E	5	32209155	C	CT	GABARAP	frameshift_variant	HIGH	p.Tyr49fs	NA
9E	9	2581736	T	C	USP36	missense_variant	MODERATE	p.Thr944Met	NA
9E	X	55851579	T	C	OGT	missense_variant	MODERATE	p.Ser953Pro	NA
9F	12	894939	A	C	DLA88	missense_variant	MODERATE	p.Ile120Ser	NA
9F	12	894940	T	G	DLA88	missense_variant	MODERATE	p.Ile120Leu	NA
9F	12	934165	A	T	DLA-12	missense_variant	MODERATE	p.Ser138Cys	NA
9F	12	1329530	G	GA	SLC44A4	frameshift_variant	HIGH	p.Phe616fs	NA
9F	13	4367227	C	T	AZIN1	missense_variant	MODERATE	p.Ser367Gly	NA
9F	16	27074869	A	T	FGFR1	missense_variant	MODERATE	p.Met537Lys	oncogene / fusion
9F	17	51537885	GA	GAA	PHTF1	frameshift_variant	HIGH	p.Met547fs	NA
9F	17	53843909	T	A	ATP1A1	missense_variant	MODERATE	p.Leu966Gln	oncogene / TSG
9F	18	50131234	A	C	SSH3	missense_variant	MODERATE	p.Ser239Ile	NA
9F	18	52823379	A	T	VEGFB	missense_variant	MODERATE	p.Cys89Ser	NA
9F	22	3111918	GT	G	LPAR6	frameshift_variant	HIGH	p.Gln156fs	NA
9F	25	9556504	CA	C	HMGB1	frameshift_variant	HIGH	p.Val175fs	NA
9F	26	10443643	C	CAA	OAS2	frameshift_variant	HIGH	p.Asn426fs	NA
9F	2	74549512	G	GA	RSRP1	frameshift_variant	HIGH	p.Ile300fs	NA
9F	30	36454758	A	G	NEO1	stop_gained	HIGH	p.Trp90*	NA
9F	32	532303	C	T	SDAD1	missense_variant	MODERATE	p.Lys150Glu	NA
9F	36	22129036	C	CA	PLEKHA3	frameshift_variant	HIGH	p.Ser244fs	NA
9F	37	1508097	CGGG	C	GLS	conservative_inframe_deletion	MODERATE	p.Gly740del	NA
9F	5	32209155	C	CT	GABARAP	frameshift_variant	HIGH	p.Tyr49fs	NA
9F	5	41309587	G	C	FLII	missense_variant	MODERATE	p.Ala558Gly	NA
9F	5	75181530	A	T	KARS	missense_variant	MODERATE	p.Glu178Asp	NA
9F	5	75181531	G	C	KARS	missense_variant	MODERATE	p.Gly179Arg	NA
9F	X	106864860	AGAG	A	HTATSF1	conservative_inframe_insertion	MODERATE	p.Glu551dup	NA
9F	JH373278.1	358374	CT	C	DDX56	frameshift_variant	HIGH	p.Leu95fs	NA
